# Supplementary material for: Efficacy of low-level laser therapy on pain and disability in knee osteoarthritis: systematic review and meta-analysis of randomised placebo-controlled trials
Source: PubMed Central journal article supplement — BMJ Open. 2019 Oct 28;9(10):e031142. doi: 10.1136/bmjopen-2019-031142 (PMC6830679; doi:10.1136/bmjopen-2019-031142), 2019-10-28
Supplement: bmjopen-2019-031142.draft_revisions.pdf [file bmjopen-2019-031142.draft_revisions.pdf]

# BMJ Open

BMJ Open is committed to open peer review. As part of this commitment we make the peer review history of every article we publish publicly available.

When an article is published we post the peer reviewers' comments and the authors' responses online. We also post the versions of the paper that were used during peer review. These are the versions that the peer review comments apply to.

The versions of the paper that follow are the versions that were submitted during the peer review process. They are not the versions of record or the final published versions. They should not be cited or distributed as the published version of this manuscript.

BMJ Open is an open access journal and the full, final, typeset and author-corrected version of record of the manuscript is available on our site with no access controls, subscription charges or pay-per-view fees (<http://bmjopen.bmj.com>).

If you have any questions on BMJ Open's open peer review process please email [info.bmjopen@bmj.com](mailto:info.bmjopen@bmj.com)

# BMJ Open

## Efficacy of low-level laser therapy on pain and disability in knee osteoarthritis: A systematic review and meta-analysis of randomized placebo-controlled trials

|                               |                                                                                                                                                                                                                                                                                                                                                                                                                                                                                                                                                                                                                                                                                                                                                                                       |
|-------------------------------|---------------------------------------------------------------------------------------------------------------------------------------------------------------------------------------------------------------------------------------------------------------------------------------------------------------------------------------------------------------------------------------------------------------------------------------------------------------------------------------------------------------------------------------------------------------------------------------------------------------------------------------------------------------------------------------------------------------------------------------------------------------------------------------|
| Journal:                      | <i>BMJ Open</i>                                                                                                                                                                                                                                                                                                                                                                                                                                                                                                                                                                                                                                                                                                                                                                       |
| Manuscript ID                 | bmjopen-2019-031142                                                                                                                                                                                                                                                                                                                                                                                                                                                                                                                                                                                                                                                                                                                                                                   |
| Article Type:                 | Research                                                                                                                                                                                                                                                                                                                                                                                                                                                                                                                                                                                                                                                                                                                                                                              |
| Date Submitted by the Author: | 18-Apr-2019                                                                                                                                                                                                                                                                                                                                                                                                                                                                                                                                                                                                                                                                                                                                                                           |
| Complete List of Authors:     | <p>Stausholm, Martin; University of Bergen, Department of Global Public Health and Primary Care<br/> Naterstad, Ingvill; University of Bergen, Department of Global Public Health and Primary Care<br/> Joensen, Jon; University of Bergen, Department of Global Public Health and Primary Care<br/> Lopes-Martins, Rodrigo; Universidade do Vale do Paraíba, Instituto de Pesquisa &amp; Desenvolvimento<br/> Sæbø, Humaira; University of Bergen, Department of Global Public Health and Primary Care<br/> Lund, Hans; Hogskulen pa Vestlandet, Centre for Evidence-Based Practice<br/> Fersum, Kjartan; University of Bergen, Department of Global Public Health and Primary Care<br/> Bjordal, Jan; University of Bergen, Department of Global Public Health and Primary Care</p> |
| Keywords:                     | Phototherapy, Laser therapy < DERMATOLOGY, Knee osteoarthritis, Systematic review, Meta-analysis                                                                                                                                                                                                                                                                                                                                                                                                                                                                                                                                                                                                                                                                                      |
|                               |                                                                                                                                                                                                                                                                                                                                                                                                                                                                                                                                                                                                                                                                                                                                                                                       |

SCHOLARONE™  
Manuscripts

# Efficacy of low-level laser therapy on pain and disability in knee osteoarthritis: A systematic review and meta-analysis of randomized placebo-controlled trials

Martin Bjørn Stausholm<sup>1</sup>, Ingvill Fjell Naterstad<sup>1</sup>, Jon Joensen<sup>1</sup>, Rodrigo Alvaro Brandão Lopes-Martins<sup>2</sup>, Humaira Sæbø<sup>1</sup>, Hans Lund<sup>3</sup>, Kjartan Vibe Fersum<sup>1</sup>, Jan Magnus Bjordal<sup>1</sup>

<sup>1</sup>Department of Global Public Health and Primary Care, University of Bergen, Bergen, Norway

<sup>2</sup>Instituto de Pesquisa & Desenvolvimento, Universidade do Vale do Paraíba, São José dos Campos, Brazil

<sup>3</sup>Centre for Evidence-Based Practice, Western Norway University of Applied Sciences, Bergen, Norway

**Correspondence to:** Martin Bjørn Stausholm [m.b.stausholm@gmail.com](mailto:m.b.stausholm@gmail.com)

**Word count, excluding title page, abstract, references, figures and tables: 2997**

## ABSTRACT

### OBJECTIVE

Low-level laser therapy (LLLT) is not recommended in major knee osteoarthritis (KOA) treatment guidelines. We investigated whether a LLLT dose-response relationship exists in KOA.

### DESIGN

We conducted a systematic review and meta-analysis of randomized placebo-controlled trials. The included trials were subgrouped by dose using the World Association for Laser Therapy treatment recommendations.

### DATA SOURCES

We searched for eligible articles using PubMed, Embase, CINAHL, PEDro, and CENTRAL on the 18<sup>th</sup> February 2019, reference lists of eligible articles, related reviews, a book, citations, and experts in the field.

### ELIGIBILITY CRITERIA FOR SELECTING STUDIES

We solely included randomized placebo-controlled trials involving participants with KOA according to the American College of Rheumatology and/or Kellgren/Lawrence criteria in which LLLT was applied to participants' knee(s). There were no language restrictions.

### RESULTS

22 trial articles were included in the meta-analysis (N = 1063). Overall, pain was significantly reduced by LLLT compared to placebo-control at the end of therapy (14.23 mm VAS [95% CI: 7.31-21.14]) and during follow-ups 2-12 weeks later (15.92 mm VAS [95% CI: 6.47-25.37]). The subgroup analysis revealed that more pain was significantly reduced by the recommended LLLT doses compared to the placebo-control at the end of therapy (18.71 mm [95% CI: 9.42-27.99]) and during follow-ups 2-12 weeks later (23.23 mm VAS [95% CI: 10.60-35.86]). The pain reduction provided by the recommended LLLT doses peaked during follow-ups 2-4 weeks after the end of therapy at 31.87 mm VAS significantly beyond placebo ([95% CI: 18.18-45.56]). A similar positive

statistically significant trend for disability was found in comparing LLLT to placebo-control. No adverse events were reported.

## CONCLUSION

LLLT is safe and offers disability reduction and clinically relevant pain relief in KOA at 4-7 Joules with 785-860 nm wavelength or 1-3 Joules with 904 nm wavelength per treatment spot.

## STUDY REGISTRATION

PROSPERO registration number: CRD42016035587.

**Keywords** Phototherapy; Laser therapy; Knee osteoarthritis; Systematic review; Meta-analysis

### Strengths and limitations of this study

- ▶ The review was conducted in conformance with an a priori published protocol including a detailed plan for statistical analysis.
- ▶ No language restrictions were applied; four (18%) of the included trials were reported in non-English language.
- ▶ Three persons each independently extracted the data for meta-analysis and resolved data disagreements by consensus-based discussions.
- ▶ A series of analyses were conducted to estimate the effectiveness of low-level laser therapy on pain over time.
- ▶ No quality of life meta-analysis was performed as this outcome was only assessed in a single included trial.

## Introduction

Approximately 13% of women and 10% of men in the population aged  $\geq 60$  years suffer from knee osteoarthritis (KOA) in the USA.<sup>1</sup> KOA is a degenerative inflammatory disease affecting the entire joint and is characterised by progressive loss of cartilage and associated with pain, disability and reduced quality of life.<sup>1</sup> Increased inflammatory activity is associated with higher pain intensity and more rapid KOA disease progression.<sup>1 2</sup>

Some of the conservative intervention options for KOA are exercise therapy, Non-Steroidal Anti-Inflammatory Drugs (NSAIDs) and anti-inflammatory Low-Level Laser Therapy (LLLT). There is evidence that exercise therapy reduces pain and disability and improves quality of life (QoL) in persons with KOA.<sup>3 4</sup> NSAIDs are recommended in most KOA clinical treatment guidelines and is probably the most frequently prescribed therapy category for osteoarthritis, despite intake of these drugs is associated with negative side effects<sup>5</sup>, which is problematic, especially in chronic diseases, such as OA, which require long-term treatment. Furthermore, the results of a network meta-analysis indicate that the pain relieving effect from NSAIDs in KOA beyond placebo is small to moderate (depending on drug type)<sup>6</sup>, and the effect of using the NSAID tiaprofenic acid, for example, is probably gone within less than two weeks, unless the treatment is continued.<sup>7</sup>

LLLT is a non-invasive treatment modality<sup>8 9</sup> with an anti-inflammatory effect<sup>9-14</sup>, which has been compared to that of a NSAID in rats with KOA by Tomazoni et al.; NSAID (10 mg diclofenac/knee/session) and LLLT (6 Joules 830 nm wavelength laser/knee/session) reduced similar levels of inflammatory cells and metalloproteinase (MP 3 and 13). In addition, LLLT reduced the expression of pro-inflammatory cytokines (interleukin-1 $\beta$ , interleukin-6, and tumour necrosis factor  $\alpha$ ), myeloperoxidase, and prostaglandin E<sub>2</sub> significantly more than NSAID did.<sup>10 11</sup> LLLT is not recommended in major osteoarthritis treatment guidelines. LLLT for KOA was mentioned in the European League Against Rheumatism (EULAR) osteoarthritis guidelines (2018) but not recommended<sup>15</sup>, and in the Osteoarthritis Research Society International (OARSI)



1  
2  
3  
4 guidelines (2018), it was stressed that LLLT should not be considered a core intervention in the  
5 management of KOA.<sup>16</sup>

6 This may be partly due to conflicting results of two recently published reviews on the current topic  
7 (Huang et al. 2015 and Rayegani et al. 2017).<sup>8 17</sup> The conflicting results may arise from omission of  
8 relevant trials<sup>8 17-23</sup> and LLLT dose-related issues. Only Huang et al. conducted a LLLT dose-  
9 response relationship investigation in KOA, i.e., by subgrouping the trials by laser dose, but they  
10 did not consider that World Association for Laser Therapy (WALT) recommends applying four  
11 times the laser dose with continuous irradiation compared to highly pulsed irradiation.<sup>17 22 24-26</sup>

12 Thus, it was unknown whether LLLT is effective in KOA, and we believed it necessitated  
13 conducting a new systematic review.

14 The objectives of the current review were to estimate the effectiveness of LLLT in KOA regarding  
15 knee pain, disability and quality of life (QoL), and we only considered randomized placebo-  
16 controlled clinical trials (RCTs) for inclusion to minimize risk of bias.

## 17 18 19 20 21 **Methods**

22 This review was conducted in adherence to a PROSPERO protocol (number CRD42016035587)  
23 and it is reported in accordance with the Preferred Reporting Items of Systematic reviews and Meta-  
24 Analysis statement 2009.<sup>27</sup>

### 25 26 **Literature search and selection of studies**

27 Any identified study was included if it was a randomized placebo-controlled trial involving  
28 participants with KOA according to the American College of Rheumatology tool and/or a  
29 radiographic inspection with the Kellgren/Lawrence (K/L) criteria, focusing on LLLT applied to  
30 participants' knee(s) and self-reported pain, disability, and/or QoL was reported. There were no  
31 language restrictions.

32 We updated a search for eligible articles indexed in PubMed, Embase, CINAHL, PEDro, and  
33 CENTRAL on the 18<sup>th</sup> February 2019. The database search strings contained synonyms for LLLT,  
34 KOA, and RCT, and keywords were added when optional (a search string is provided in the  
35 PROSPERO protocol). The search was continued by reading reference lists of all the eligible trial  
36 and relevant review articles<sup>8 17 28</sup>, citations<sup>29-33</sup>, and a laser book<sup>34</sup>, and involving experts in the field.  
37 Two reviewers (MBS and JMB) each independently selected the trial articles. Both reviewers  
38 scrutinized the titles/abstracts of all the publications identified in the search, and any accessible full-  
39 text article was retrieved if it was judged potential eligible by at least one reviewer. Both reviewers  
40 evaluated the full texts of all potentially eligible retrieved articles and made an independent decision  
41 to include or exclude each article, with close attention to the inclusion criteria. When selection  
42 disagreements could not be resolved by discussion, a third reviewer (IFN) made the final  
43 consensus-based decision. Any retrieved article not fulfilling the inclusion criteria was omitted and  
44 listed with reason for exclusion.

### 45 46 47 48 **Risk of bias analysis**

49 Two reviewers (MBS and JJ) each independently evaluated all included trials for risk of bias at the  
50 outcome level, using the Cochrane Collaboration's risk of bias tool.<sup>35</sup> When risk of bias  
51 disagreements could not be resolved by discussion, a third reviewer (IFN) made the final  
52 consensus-based decision. Likelihood of publication bias was assessed with graphical funnel  
53 plots.<sup>35</sup>

### 54 55 56 57 **Data-extraction and meta-analysis**

Three reviewers (MBS, JMB, and KVF) each independently extracted the data for meta-analysis. Two of the reviewers (MBS and KVF) each independently collected the other trial characteristics. The data-extraction forms were subsequently compared, and data disagreements were resolved by consensus-based discussions. Summary data were extracted, unless published individual participant data were available.<sup>21</sup> The results from the included trials for statistical analysis were selected from outcome scales in adherence to hierarchies published by Juhl et al.<sup>36</sup>

Pain intensity was the primary outcome. As pain reported with continuous, numeric and categorical/Likert scales highly correlates with pain measured using the Visual Analogue Scale (VAS), the scores of all pain scales were transformed to 0-100%, corresponding to 0-100 mm VAS.<sup>37</sup> The pain results were combined with the Mean Difference (MD) method, primarily using change scores, i.e., when only final scores could be obtained from a trial, change and final scores were mixed in the analysis, since the MD method allows for this without introducing bias.<sup>35</sup>

Self-reported disability and QoL results were synthesized using the Standardized Mean Difference (SMD) method using change scores solely. The SMD was adjusted to Hedges' *g* and interpreted as follows: SMDs of 0.2, ~ 0.5, and > 0.8 represent a small, moderate, and large effect, respectively.<sup>35</sup>

Random effects meta-analyses were conducted, and impact from heterogeneity (inconsistency) on the analyses was examined using *I*<sup>2</sup> statistics. An *I*<sup>2</sup> value of 0% indicates no inconsistency, and an *I*<sup>2</sup> value of 100% indicates maximal inconsistency<sup>35</sup>; the values were categorized as low (25%), moderate (50%), and high (75%).<sup>38</sup>

Standard deviations (SD) for analysis were extracted or estimated from other variance data in a pre-specified prioritized order: (1) SD, (2) standard error, (3) 95% confidence interval, (4) P-value, (5) interquartile range, (6) median of correlations, (7) visually from graph, or (8) other methods.<sup>35</sup>

The trials were subgrouped by adherence and non-adherence to the WALT recommendations for laser dose per treatment spot, as pre-specified. WALT recommends irradiating the knee joint line/synovia with the following laser doses per treatment spot:  $\geq 4$  Joules applied with 5-500 mW mean power using 780-860 nm wavelength and/or  $\geq 1$  Joules applied with 5-500 mW mean power ( $> 1000$  mW peak power) using 904 nm wavelength.<sup>24 25</sup>

The main meta-analyses were conducted using two pre-specified time points of assessment, i.e., immediately after the end of LLLT and last time point of assessment 1-12 weeks after the end of LLLT (follow-up).

MBS performed the meta-analyses, under supervision of JMB, using the software programs Excel 2016 (Microsoft) and Review Manager Version 5.3 (Copenhagen: The Nordic Cochrane Centre, The Cochrane Collaboration, 2014).

### Patient and public involvement

Patients or the public were not involved in the conceptualisation or carrying out of this research.

### Results

In total, 2735 publications were identified in the search, of which 22 trial articles were judged eligible and included in the review (N = 1089) (fig 1 and table 1-2) with data for meta-analysis (N = 1063). Four included trials were not reported in the English language<sup>19 21 23 39</sup> and one included trial was unpublished (Gur and Oktayoglu). Excluded articles initially judged potentially eligible were listed with reasons for omission (supplementary material).

Fig 1 | Flow chart illustrating the trial identification process

LLLT = low-level laser therapy; ACR = American College of Rheumatology; K/L = Kellgren/Lawrence.

At the group level, the mean age of the participants was 60.25 (50.11-69) years (data from 19 trials), the mean percentage of women was 69.63 (0-100) (data from 17 trials), the mean BMI of the

participants was 29.55 (25.8-38) (data from 14 trials), the mean of median K/L grades was 2.37 (data from 13 trials) and the mean baseline pain was 63.61 mm VAS (35.25-92) (data from 22 trials). LLLT was used as an adjunct to exercise therapy in eleven trials. The mean duration of the treatment periods was 3.53 weeks with the recommended LLLT doses and 3.89 weeks with the non-recommended LLLT doses (table 1-2). Non-recommended LLLT doses were applied in nine of the trials. That is, Al Rashoud et al.<sup>31</sup>, Bülow et al.<sup>20</sup>, Tascioglu et al.<sup>40</sup>, and Bagheri et al.<sup>23</sup> applied too few (< 4) Joules per treatment spot with 830 nm wavelength, Jensen et al.<sup>21</sup>, Nivbrant et al.<sup>19</sup> and Hinman et al.<sup>41</sup> applied too few (< 1) Joules per treatment spot with 904 nm wavelength, and Youssef et al.<sup>42</sup> (one group) and Rayegani et al.<sup>43</sup> used continuous laser with too long of a wavelength (880 nm) (table 2). No adverse event was reported by any of the trial authors. None of the authors stated receiving funding from the laser industry (supplementary material).

Table 1 | Characteristics of the included trials

| First author                        | Intervention group at baseline                                                         | Control group at baseline                                                             | Intervention vs control programme                                                                                                               | Outcome scales, week of assessment after baseline                                               |
|-------------------------------------|----------------------------------------------------------------------------------------|---------------------------------------------------------------------------------------|-------------------------------------------------------------------------------------------------------------------------------------------------|-------------------------------------------------------------------------------------------------|
| Al Rashoud 2014 <sup>31</sup>       | N: 26<br>Women: 62%<br>Age: 52 years<br>BMI: 38<br>VAS pain: 64 mm<br>K/L: -           | N: 23<br>Women: 65%<br>Age: 56 years<br>BMI: 37.1<br>VAS pain: 59 mm<br>K/L: -        | 3 weeks of exercise therapy, advice, and LLLT vs 3 weeks of exercise therapy, advice, and sham LLLT                                             | Pain: VAS (movement)<br>Disability: SKFS<br>QoL: -<br>Week of assessment: 2, 3, 9, 29           |
| Alfredo 2011/2018 <sup>29, 44</sup> | N: 24<br>Women: 75%<br>Age: 61.15 years<br>BMI: 30.16<br>VAS pain: 53.2 mm<br>K/L: 3   | N: 22<br>Women: 80%<br>Age: 62.25 years<br>BMI: 29.21<br>VAS pain: 35.4 mm<br>K/L: 2  | 3 weeks of LLLT followed by 8 weeks of exercise therapy vs 3 weeks of sham LLLT followed by 8 weeks of exercise therapy                         | Pain: WOMAC<br>Disability: WOMAC<br>QoL: -<br>Week of assessment: 3, 11, 24, 37                 |
| Alghadir 2014 <sup>32</sup>         | N: 20<br>Women: 50%<br>Age: 55.2 years<br>BMI: 32.34<br>VAS pain: 74.5 mm<br>K/L: 2    | N: 20<br>Women: 40%<br>Age: 57 years<br>BMI: 33.09<br>VAS pain: 75.5 mm<br>K/L: 2     | 4 weeks of exercise therapy, heat packs, and LLLT vs 4 weeks of exercise therapy, heat packs, and sham LLLT                                     | Pain: WOMAC<br>Disability: WOMAC<br>QoL: -<br>Week of assessment: 4                             |
| Bagheri 2011 <sup>23</sup>          | N: 18<br>Women: 83.13%<br>Age: 58.32 years<br>BMI: 28.87<br>VAS pain: 67 mm<br>K/L: -  | N: 18<br>Women: 83.13%<br>Age: 56.14 years<br>BMI: 27.66<br>VAS pain: 59 mm<br>K/L: - | 5 weeks of exercise therapy, therapeutic ultrasound, TENS, and LLLT vs 5 weeks of exercise therapy, therapeutic ultrasound, TENS, and sham LLLT | Pain: WOMAC (VAS) 0-100<br>Disability: WOMAC<br>QoL: -<br>Week of assessment: 5                 |
| Bülow 1994 <sup>20</sup>            | N: 14<br>Women: -<br>Age: -<br>BMI: -<br>VAS pain: 65.08 mm<br>K/L: -                  | N: 15<br>Women: -<br>Age: -<br>BMI: -<br>VAS pain: 56.35 mm<br>K/L: -                 | 3 weeks of LLLT vs 3 weeks of sham LLLT                                                                                                         | Pain: 0-121 Likert scale (movement/rest)<br>Disability: -<br>QoL: -<br>Week of assessment: 3, 6 |
| Delkhosh 2018 <sup>39</sup>         | N: 15<br>Women: 100%<br>Age: 55.9 years<br>BMI: 26.5<br>VAS pain: 57 mm<br>K/L: -      | N: 15<br>Women: 100%<br>Age: 58.3 years<br>BMI: 27.8<br>VAS pain: 45 mm<br>K/L: -     | 2 weeks of exercise therapy, therapeutic ultrasound, TENS, and LLLT vs 2 weeks of exercise therapy, therapeutic ultrasound, TENS, and sham LLLT | Pain: VAS<br>Disability: WOMAC<br>QoL: -<br>Week of assessment: 2, 8                            |
| Fukuda 2011 <sup>30</sup>           | N: 25<br>Women: 80%<br>Age: 63 years<br>BMI: 30<br>VAS pain: 61 mm<br>K/L: 2           | N: 22<br>Women: 64%<br>Age: 63 years<br>BMI: 30<br>VAS pain: 62 mm<br>K/L: 2          | 3 weeks of LLLT vs 3 weeks of sham LLLT                                                                                                         | Pain: VNSP (movement)<br>Disability: Lequesne<br>QoL: -<br>Week of assessment: 3                |
| Gur 2003 <sup>33</sup> (1.5 Joules) | N: 30<br>Women: 83.3%<br>Age: 58.64 years<br>BMI: 31.17<br>VAS pain: 73.2 mm<br>K/L: 2 | N: 30<br>Women: 80%<br>Age: 60.52 years<br>BMI: 30.27<br>VAS pain: 67.4 mm<br>K/L: 2  | 14 weeks of exercise and 2 weeks of LLLT vs 14 weeks of exercise and 2 weeks of sham LLLT                                                       | Pain: VAS (movement)<br>Disability: -<br>QoL: -<br>Week of assessment: 6, 10, 14                |
| Gur 2003 <sup>33</sup> (1 Joules)   | N: 30<br>Women: 76.7%                                                                  | N: 30<br>Women: 80%                                                                   | 14 weeks of exercise and 2 weeks of LLLT vs 14 weeks                                                                                            | Pain: VAS (movement)<br>Disability: -                                                           |

|                               |                                                                                        |                                                                                        |                                                                                                          |                                                                                                 |
|-------------------------------|----------------------------------------------------------------------------------------|----------------------------------------------------------------------------------------|----------------------------------------------------------------------------------------------------------|-------------------------------------------------------------------------------------------------|
|                               | Age: 59.8 years<br>BMI: 28.49<br>VAS pain: 74.4 mm<br>K/L: 2                           | Age: 60.52 years<br>BMI: 30.27<br>VAS pain: 67.4 mm<br>K/L: 2                          | of exercise and 2 weeks of<br>sham LLLT                                                                  | QoL: -<br>Week of assessment: 6, 10, 14                                                         |
| Gur and Oktayoglu             | N: 40<br>Women: 75%<br>Age: 58.2 years<br>BMI: 29.11<br>VAS pain: 88 mm<br>K/L: 3      | N: 40<br>Women: 72.5%<br>Age: 58.26 years<br>BMI: 30.11<br>VAS pain: 92 mm<br>K/L: 3   | 14 weeks of exercise and 2<br>weeks of LLLT vs 14 weeks<br>of exercise and 2 weeks of<br>sham LLLT       | Pain: VAS (movement)<br>Disability: -<br>QoL: -<br>Week of assessment: 6, 10, 14                |
| Gworys 2012 <sup>18</sup>     | N: 34<br>Women: -<br>Age: 57.6<br>BMI: -<br>VAS pain: 54 mm<br>K/L: -                  | N: 31<br>Women: -<br>Age: 67.7<br>BMI: -<br>VAS pain: -<br>K/L: -                      | 2 weeks of LLLT vs 2 weeks<br>of sham LLLT                                                               | Pain: VAS<br>Disability: Lequesne<br>QoL: -<br>Week of assessment: 2                            |
| Hegedus 2009 <sup>45</sup>    | N: 18<br>Women: -<br>Age: -<br>BMI: -<br>VAS pain: 57.5 mm<br>K/L: 2                   | N: 17<br>Women: -<br>Age: -<br>BMI: -<br>VAS pain: 56.2 mm<br>K/L: 2                   | 4 weeks of LLLT vs 4 weeks<br>of sham LLLT                                                               | Pain: VAS<br>Disability: -<br>QoL: -<br>Week of assessment: 4, 6, 12                            |
| Helianthi 2016 <sup>46</sup>  | N: 30<br>Women: 60%<br>Age: 69 years<br>BMI: 25.8<br>VAS pain: 60.2 mm<br>K/L: 3       | N: 29<br>Women: 82.8%<br>Age: 68 years<br>BMI: 26.3<br>VAS pain: 54.1 mm<br>K/L: 3     | 5 weeks of LLLT vs 5 weeks<br>of sham LLLT                                                               | Pain: VAS (movement)<br>Disability: Lequesne<br>QoL: -<br>Week of assessment: 2, 5, 7           |
| Hinman 2014 <sup>41</sup>     | N: 71<br>Women: 39%<br>Age: 63.4 years<br>BMI: 30.7<br>VAS pain: 41.5 mm<br>K/L: -     | N: 70<br>Women: 56%<br>Age: 63.8 years<br>BMI: 28.8<br>VAS pain: 43 mm<br>K/L: -       | 12 weeks of LLLT vs 12<br>weeks of sham LLLT                                                             | Pain: WOMAC<br>Disability: WOMAC<br>QoL: AQoL-6D<br>Week of assessment: 12, 52                  |
| Jensen 1987 <sup>21</sup>     | N: 13<br>Women: -<br>Age: -<br>BMI: -<br>VAS pain: 67 mm<br>K/L: -                     | N: 16<br>Women: -<br>Age: -<br>BMI: -<br>VAS pain: 72.6 mm<br>K/L: -                   | 1 week of LLLT vs 1 week<br>of sham LLLT                                                                 | Pain: 0-21 (movement)<br>Disability: -<br>QoL: -<br>Week of assessment: 1                       |
| Kheshie 2014 <sup>47</sup>    | N: 18<br>Women: 0%<br>Age: 56.56 years<br>BMI: 28.62<br>VAS pain: 76.8 mm<br>K/L: 2.5  | N: 15<br>Women: 0%<br>Age: 55.6 years<br>BMI: 28.51<br>VAS pain: 78.7 mm<br>K/L: 2.5   | 6 weeks of exercise and<br>LLLT vs 6 weeks of exercise<br>and sham LLLT                                  | Pain: WOMAC<br>Disability: WOMAC<br>QoL: -<br>Week of assessment: 6                             |
| Koutenaevi 2017 <sup>48</sup> | N: 20<br>Women: 85%<br>Age: 52.3 years<br>BMI: 28.4<br>VAS pain: 74 mm<br>K/L: 3       | N: 20<br>Women: 80%<br>Age: 53 years<br>BMI: 28.6<br>VAS pain: 65.5 mm<br>K/L: 3       | 2 weeks of exercise and<br>LLLT vs 2 weeks of exercise<br>and sham LLLT                                  | Pain: VAS (movement)<br>Disability: -<br>QoL: -<br>Week of assessment: 2, 4                     |
| Mohammed 2018 <sup>49</sup>   | N: 20<br>Women: 85%<br>Age: 55.25 years<br>BMI: $\geq 25$<br>VAS pain: 70 mm<br>K/L: 2 | N: 20<br>Women: 85%<br>Age: 50.11 years<br>BMI: $\geq 25$<br>VAS pain: 80 mm<br>K/L: 2 | 4 weeks of LLLT vs 4 weeks<br>of sham LLLT                                                               | Pain: VAS<br>Disability: -<br>QoL: -<br>Week of assessment: 4                                   |
| Nambi 2016 <sup>50</sup>      | N: 17<br>Women: -<br>Age: 58<br>BMI: 26.9<br>VAS pain: 78 mm<br>K/L: 3.1               | N: 17<br>Women: -<br>Age: 60<br>BMI: 28.3<br>VAS pain: 76 mm<br>K/L: 3.2               | 4 weeks of exercise, kinesio<br>tape, and LLLT vs 4 weeks<br>of exercise, kinesio tape, and<br>sham LLLT | Pain: VAS<br>Disability: -<br>QoL: -<br>Week of assessment: 4, 8                                |
| Nivbrant 1992 <sup>19</sup>   | N: 15<br>Women: 69.2%<br>Age: 69 years<br>BMI: -<br>VAS pain: 67 mm<br>K/L: -          | N: 15<br>Women: 84.6%<br>Age: 66 years<br>BMI: -<br>VAS pain: 58 mm<br>K/L: -          | 2 weeks of LLLT vs 2 weeks<br>of sham LLLT                                                               | Pain: VAS (movement)<br>Disability: Walking disability<br>QoL: -<br>Week of assessment: 2, 3, 6 |
| Rayegani 2012 <sup>43</sup>   | N: 12<br>Women: 83.3%                                                                  | N: 13<br>Women: 92.3%                                                                  | 2 weeks of LLLT vs 2 weeks<br>of sham LLLT                                                               | Pain: WOMAC<br>Disability: WOMAC                                                                |

1  
2  
3  
4  
5  
6  
7  
8  
9  
10  
11  
12  
13  
14  
15  
16  
17  
18  
19  
20  
21  
22  
23  
24  
25  
26  
27  
28  
29  
30  
31  
32  
33  
34  
35  
36  
37  
38  
39  
40  
41  
42  
43  
44  
45  
46  
47  
48  
49  
50  
51  
52  
53  
54  
55  
56  
57  
58  
59  
60

|                                           |                                                                                         |                                                                                       |                                                                   |                                                                                |
|-------------------------------------------|-----------------------------------------------------------------------------------------|---------------------------------------------------------------------------------------|-------------------------------------------------------------------|--------------------------------------------------------------------------------|
|                                           | Age: 61.7 years<br>BMI: -<br>VAS pain: 63 mm<br>K/L: < 4                                | Age: 61.2 years<br>BMI: -<br>VAS pain: 52 mm<br>K/L: < 4                              |                                                                   | QoL: -<br>Week of assessment: <b>6, 14</b>                                     |
| Tascioglu 2004 <sup>40</sup> (3 Joules)   | N: 20<br>Women: 70%<br>Age: 62.86 years<br>BMI: 27.56<br>VAS pain: 68 mm<br>K/L: 2      | N: 20<br>Women: 65%<br>Age: 64.27 years<br>BMI: 29.56<br>VAS pain: 63.88 mm<br>K/L: 2 | 10 days of LLLT vs 10 days of sham LLLT                           | Pain: WOMAC<br>Disability: WOMAC<br>QoL: -<br>Week of assessment: <b>3, 26</b> |
| Tascioglu 2004 <sup>40</sup> (1.5 Joules) | N: 20<br>Women: 75%<br>Age: 59.92 years<br>BMI: 28.63<br>VAS pain: 65.72 mm<br>K/L: 2.5 | N: 20<br>Women: 65%<br>Age: 64.27 years<br>BMI: 29.56<br>VAS pain: 63.88 mm<br>K/L: 2 | 10 days of LLLT vs 10 days of sham LLLT                           | Pain: WOMAC<br>Disability: WOMAC<br>QoL: -<br>Week of assessment: <b>3, 26</b> |
| Youssef 2016 <sup>42</sup> (904 nm)       | N: 18<br>Women: 66.7%<br>Age: 67.5<br>BMI: < 40<br>VAS pain: 51.67 mm<br>K/L: 2         | N: 15<br>Women: 66.7%<br>Age: 66.3 years<br>BMI: < 40<br>VAS pain: 50.00 mm<br>K/L: 2 | 8 weeks of exercise and LLLT vs 8 weeks of exercise and sham LLLT | Pain: WOMAC<br>Disability: WOMAC<br>QoL: -<br>Week of assessment: <b>8</b>     |
| Youssef 2016 <sup>42</sup> (880 nm)       | N: 18<br>Women: 61.1%<br>Age: 67.3<br>BMI: < 40<br>VAS pain: 52.50 mm<br>K/L: 2         | N: 15<br>Women: 66.7%<br>Age: 66.3 years<br>BMI: < 40<br>VAS pain: 50.00 mm<br>K/L: 2 | 8 weeks of exercise and LLLT vs 8 weeks of exercise and sham LLLT | Pain: WOMAC<br>Disability: WOMAC<br>QoL: -<br>Week of assessment: <b>8</b>     |

VAS = Visual Analogue Scale; VNPS = visual numerical pain scale; WOMAC = Western Ontario and McMaster Universities Osteoarthritis Index; NRS = Numeric Rating Scale; DIQ = Disability Index Questionnaire; SKFS = Saudi Knee Function Scale; QoL = Quality of life; AQoL-6D = Assessment of Quality of Life 6 Dimensions; TENS = transcutaneous electrical nerve stimulation.

The values for age and body mass index (BMI) are means, and the values for the Kellgren/Lawrence (K/L) grade are medians. Baseline VAS scores have been extracted or estimated as described in the method section. Week of assessment in bold denotes time point used for the main meta-analyses.

Table 2 | Laser characteristics of the included trials

| First author                         | Treated area                                                         | Wave-length (nm) | Joules per treatment spot | Mean output (mW) | Seconds per treated spot | Number of spots treated | Sessions/sessions per week |
|--------------------------------------|----------------------------------------------------------------------|------------------|---------------------------|------------------|--------------------------|-------------------------|----------------------------|
| Al Rashoud 2014 <sup>31*</sup>       | Knee joint line (medial and lateral) and acupoints (SP9, SP10, ST36) | 830              | 1.2                       | 30               | 40                       | 5                       | 9/3                        |
| Alfredo 2011, 2018 <sup>29, 44</sup> | Knee joint line (medial and lateral)                                 | 904              | 3                         | 60               | 50                       | 9                       | 9/3                        |
| Alghadir 2014 <sup>32</sup>          | Knee condyles, joint line (medial and lateral), and popliteal fossa  | 850              | 6                         | 100              | 60                       | 8                       | 8/2                        |
| Bagheri 2011 <sup>23*</sup>          | Knee joint line                                                      | 830              | 3                         | 30               | 100                      | 10                      | 10/5                       |
| Bülow 1994 <sup>20*</sup>            | Painful spots in 0-10 cm radius of the knee joint line               | 830              | 1.5-4.5                   | 25               | 60-180                   | 5-15                    | 9/3                        |
| Delkhosh 2018 <sup>39</sup>          | Knee joint                                                           | 830              | 5                         | 30               | 167                      | 5                       | 10/5                       |
| Fukuda 2011 <sup>30</sup>            | Front knee capsule                                                   | 904              | 3                         | 60               | 50                       | 9                       | 9/3                        |
| Gur 2003 <sup>33</sup> (1.5 Joules)  | Antero-lateral and antero-medial portal of the knee                  | 904              | 1.5                       | 10               | 150                      | 2                       | 10/2                       |
| Gur 2003 <sup>33</sup> (1 Joules)    | Antero-lateral and antero-medial portal of the knee                  | 904              | 1                         | 11.2             | 90                       | 2                       | 10/2                       |
| Gur and Oktayoglu                    | Antero-lateral and antero-medial portal of the knee                  | 904              | 1.5                       | 10               | 150                      | 2                       | 10/2                       |
| Gworys 2012 <sup>18</sup>            | Knee joint line, patellofemoral joint, and popliteal fossa           | 810              | 6.6                       | 400              | 16                       | 7                       | 10/2                       |
| Hegedus 2009 <sup>45</sup>           | Knee joint line, popliteal fossa, and condyles                       | 830              | 6                         | 50               | 120                      | 8                       | 8/2                        |
| Helianthi 2016 <sup>46</sup>         | Knee joint line (lateral) and acupoints (ST36, SP9, GB34, EX-LE-4)   | 785              | 4                         | 50               | 80                       | 5                       | 10/2                       |
| Hinman 2014 <sup>41*</sup>           | Acupoints (locations not stated)                                     | 904              | 0.2                       | 10               | 20                       | 6                       | 8-12/0.67-1                |



|                                            |                                                                         |     |       |     |     |   |      |
|--------------------------------------------|-------------------------------------------------------------------------|-----|-------|-----|-----|---|------|
| Jensen 1987 <sup>21*</sup>                 | Knee joint line (medial and lateral), apex and basis of patellae        | 904 | 0.054 | 0.3 | 180 | 4 | 5/5  |
| Kheshie 2014 <sup>47#</sup>                | Front knee                                                              | 830 | -     | 160 | -   | - | 12/2 |
| Koutenaiei 2017 <sup>48</sup>              | Front knee, popliteal fossa, and femur condyles in the popliteal cavity | 810 | 7     | 100 | 70  | 8 | 10/5 |
| Mohammed 2018 <sup>49</sup>                | Knee joint line (lateral) and acupoints (ST36, Sp10, GB, ashi)          | 808 | 5.4   | 90  | 60  | 7 | 12/3 |
| Nambi 2016 <sup>50</sup>                   | Knee joint line, condyles, and popliteal fossa                          | 904 | 1.5   | 25  | 60  | 8 | 12/4 |
| Nivbrant 1992 <sup>19*</sup>               | Knee joint line (medial and lateral) and acupoints (ST34, SP10, X32)    | 904 | 0.72  | 4   | 180 | 7 | 6/3  |
| Rayegani 2012 <sup>43*</sup>               | Knee joint line and popliteal fossa                                     | 880 | 6     | 50  | 120 | 8 | 10/5 |
| Tascioglu 2004 <sup>40</sup> (3 Joules)*   | Painful spots on the knee                                               | 830 | 3     | 50  | 60  | 5 | 10/5 |
| Tascioglu 2004 <sup>40</sup> (1.5 Joules)* | Painful spots on the knee                                               | 830 | 1.5   | 50  | 30  | 5 | 10/5 |
| Youssef 2016 <sup>42</sup> (904 nm)        | Knee joint line (medial and lateral)                                    | 904 | 3     | 60  | 50  | 9 | 16/2 |
| Youssef 2016 <sup>42</sup> (880 nm)*       | Knee joint line (medial and lateral), epicondyles and popliteal fossa   | 880 | 6     | 50  | 120 | 8 | 16/2 |

\* Non-recommended LLLT dose; # 1250 Joules per session.

Regardless of laser doses applied, pain was significantly reduced by LLLT compared to the placebo-control at the end of therapy (14.23 mm VAS [95% CI: 7.31 to 21.14];  $I^2 = 93\%$ ;  $N = 816$ ) (fig 2) and during follow-ups 2-12 weeks later (15.92 mm VAS [95% CI: 6.47 to 25.37];  $I^2 = 93\%$ ;  $N = 581$ ) (fig 3). The dose subgroup analyses demonstrated that more pain was significantly reduced by the recommended LLLT doses compared to the placebo-control at the end of therapy (18.71 mm [95% CI: 9.42 to 27.99];  $I^2 = 95\%$ ;  $N = 480$ ) (fig 2) and during follow-ups 2-12 weeks later (23.23 mm VAS [95% CI: 10.60 to 35.86];  $I^2 = 95\%$ ;  $N = 392$ ) (fig 3). The dose subgroup analyses demonstrated that pain was significantly reduced by the non-recommended LLLT doses compared to placebo-control at the end of therapy (6.34 mm VAS [95% CI: 1.26 to 11.41];  $I^2 = 44\%$ ;  $N = 336$ ) (fig 2), but the difference during follow-ups 2-12 weeks later was not significant (6.20 mm VAS [95% CI: -0.65 to 13.05];  $I^2 = 38\%$ ;  $N = 189$ ) (fig 3). The between-subgroup differences in pain results (recommended vs non-recommended doses) were significantly in favour of the recommended LLLT doses regarding both time points ( $P = 0.02$  and  $0.02$ ) (fig 2-3).

Regardless of laser doses applied, disability was significantly reduced by LLLT compared to placebo-control at the end of therapy (SMD = 0.59 [95% CI: 0.33 to 0.86];  $I^2 = 57\%$ ;  $N = 617$ ) (fig 4) and during follow-ups 2-12 weeks later (SMD = 0.66 [95% CI: 0.23 to 1.09];  $I^2 = 67\%$ ;  $N = 289$ ) (fig 5). The dose subgroup analyses demonstrated that more disability was significantly reduced by the recommended LLLT doses compared to placebo-control at the end of therapy (SMD = 0.75 [95% CI: 0.46 to 1.03];  $I^2 = 34\%$ ;  $N = 339$ ) (fig 4) and during follow-ups 2-8 weeks later (SMD = 1.31 [95% CI: 0.92 to 1.69];  $I^2 = 0\%$ ;  $N = 129$ ) (fig 5). The dose subgroup analyses demonstrated that disability was neither significantly reduced by the non-recommended LLLT doses compared to placebo-control at the end of therapy (SMD = 0.36 [95% CI: -0.02 to 0.73];  $I^2 = 49\%$ ;  $N = 278$ ) (fig 4) nor during follow-ups 2-12 weeks later (SMD = 0.26 [95% CI: -0.06 to 0.58];  $I^2 = 0\%$ ;  $N = 160$ ) (fig 5). The between-subgroup difference in disability results was significantly in favour of the recommended LLLT doses over the non-recommended LLLT doses regarding one of two time points ( $P = 0.11$  and  $< 0.0001$ ) (fig 4-5).

No QoL meta-analysis was performed because this outcome was only assessed in a single trial, i.e., by Hinman et al. who applied a non-recommended LLLT dose and reported insignificant results.<sup>41</sup> The funnel plots revealed no publication bias (supplementary material). Additionally, the point effect estimates only changed negligible by changing to fixed effect models post hoc, indicating that the effect estimates were not influenced by small study biases (supplementary material).

Post hoc analyses showed that LLLT was significantly superior to the placebo-control both with and without exercise therapy as cointervention ( $P \leq 0.007$ ) (supplementary material).

1  
2  
3  
4 The therapists were not blinded in six of the trials (fig 6), however, post hoc analyses revealed that  
5 there was no statistically significant interaction between the effect estimates and any of the risk of  
6 bias domains judged and no drop in statistical heterogeneity (supplementary material). The same  
7 applied to the statistical heterogeneity when we changed from the MD to the SMD method post hoc  
8 (supplementary material).

9  
10 Post hoc analyses were performed to more precisely estimate the pain time-effect profile for the  
11 recommended LLLT doses by imputing the results of the trials with these doses in subgroups with  
12 narrower time intervals. Pain was significantly reduced by the recommended LLLT doses compared  
13 to the placebo-control immediately after therapy week 2-3 and 4-8 and at follow-ups 2-4, 6-8 and  
14 12 weeks later; the peak point was 2-4 weeks after the end of therapy (31.87 mm VAS beyond  
15 placebo [95% CI: 18.18 to 45.56];  $I^2 = 93%$ ;  $N = 322$ ). The 21- and 34-weeks follow-up pain results  
16 were not statistically significant (fig 7 and supplemental material). The statistical heterogeneity in  
17 the main pain analyses of the recommended LLLT doses was high ( $I^2 = 95%$ ) (fig 2-3) but the mean  
18 statistical heterogeneity of the six subgroups covering the same time period was only moderate ( $I^2 =$   
19  $58%$ ) (fig 7 and supplementary material).

20  
21  
22  
23 Fig 2 | Pain results from immediately after the end of therapy

24  
25 Fig 3 | Pain results from 2-12-weeks follow-ups

26  
27 Fig 4 | Disability results from immediately after the end of therapy

28  
29 Fig 5 | Disability results from 2-12-weeks follow-ups

30  
31 Fig 6 | Risk of bias plot of the included trials

32 The trials are ranked by pain point effect estimates, i.e., more LLLT positive results in the bottom of the fig; the plot is  
33 based on the results from the main pain analyses (immediately after the end of therapy, primarily). Support for our  
34 judgements and risk of bias statistical analyses are available (supplementary material).

35  
36 Fig 7 | Pain time-effect profile (recommended LLLT doses vs placebo-control)

37 Values on the y-axis are mm VAS pain results. Positive VAS score indicates the recommended LLLT doses are  
38 superior to the placebo-control. The related forest plot is available (supplementary material).

39 VAS = Visual Analogue Scale.

40 \* Recommended LLLT doses are statistically significantly superior to the placebo-control ( $P \leq 0.05$ ); \*\* Recommended  
41 LLLT doses are statistically significantly superior to the placebo-control ( $P \leq 0.01$ ).

## 42 43 Discussion

44 Our meta-analyses showed that pain and disability were significantly reduced by LLLT compared  
45 to the placebo-control, regardless of the laser doses applied. Subsequently, we sub-grouped the  
46 included trials according to the WALT recommendations (2010) for laser dose per treatment spot,  
47 and this revealed a dose-response relationship. The subgroup analyses demonstrated that pain was  
48 reduced significantly more by the recommended LLLT doses compared to the placebo-control at  
49 the end of therapy and that the pain relief improved slightly during the time of follow-up. The non-  
50 recommended LLLT doses provided no or little positive effect beyond placebo.

51 The statistical heterogeneity in the pain analyses of the recommended LLLT doses was high, and  
52 some of it is due to the increase and subsequent decrease in pain reduction with time. The pain  
53 sensitivity analysis for time showed a drop in the mean statistical heterogeneity to a moderate level.  
54 The time-effect profile demonstrated that pain was significantly reduced by the recommended  
55 LLLT doses compared to the placebo-control, even at follow-up 12 weeks post-therapy, and that the  
56 pain reduction provided by these doses peaked during the follow-ups 2-4 weeks post-therapy at  
57 31.87 mm VAS highly significantly beyond placebo. Our pain results are between-group (placebo-  
58  
59  
60

controlled) estimates and a mix of pain during movement (primarily) and global pain. In comparison, the estimated minimal clinically important pain reduction within-subject is 19.9 mm VAS pain (depending on, e.g., the level of baseline pain) or 40.8% during movement.<sup>51</sup> Thus, our results clearly demonstrate that the recommended LLLT doses offer a clinically important level of KOA pain relief.

Our analyses also demonstrated that disability was significantly more reduced by the recommended LLLT doses compared to the placebo-control at the end of therapy (SMD = 0.75) and during follow-ups 2-8 weeks later (SMD = 1.31).

Furthermore, we found that LLLT appears effective as a single therapy as well as an adjunct to exercise therapy.

Subgrouping all the trials by risk of bias judgements in pain and disability analyses only altered the statistical heterogeneity by negligible levels, indicating that the trials were generally of high methodological quality.

According to WALT, the osteoarthritic knee should be laser irradiated to reduce inflammation and promote tissue repair.<sup>24 25 52</sup> One of the discrepancies from our review and previously published reviews of the same topic is that we omitted the RCT by Yurtkuran et al.<sup>8 17 28 53</sup>, as they solely applied laser to an acupoint located distally from the knee joint (spleen 9).<sup>53</sup>

In line with our findings and the WALT dose recommendations, Joensen et al. (2012) observed that the percentage of laser penetrating rat skin at 810 and 904 nm wavelength was 20 and 38-58, respectively. That is, to deliver the same dose beneath the skin, 2.4 times the energy on the skin surface is required with an 810 nm laser compared to a 904 nm laser device. This may be due to the different wavelengths and/or because 904 nm laser is super-pulsed (pulse peak power  $\geq 10000$  mW typically), whereas shorter wavelength laser is delivered continuously or with less intense pulsation.<sup>26</sup> The estimated median dose applied with the recommended LLLT was six and three Joules per treatment spot with 785-860 and 904 nm wavelength laser, respectively. Most of the trial authors reported LLLT parameters in detail but did not state whether the laser devices were calibrated. That is, in the LLLT trials with non-significant effect estimates, equipment failure cannot be ruled out.

It is important to note that no adverse events were reported by any of the trial authors and the dropout rate was minor, indicating that LLLT is harmless.

The positive effect from LLLT lasts longer than those of widely recommended painkiller drugs<sup>7</sup>, and future trials with booster sessions of LLLT should be conducted to see if the effect can be prolonged. Analyses of LLLT vs NSAIDs in terms of cost-effectiveness would also provide valuable information.

### Limitations

This review lacks QoL analyses and direct comparisons between LLLT and other interventions.

### Conclusions

LLLT is safe and offers disability reduction and clinically relevant pain relief in KOA at 4-7 Joules with 785-860 nm wavelength or 1-3 Joules with 904 nm wavelength per treatment spot on the knee joint.

**Contributors:** MBS, JMB, and HL wrote the PROSPERO protocol. MBS and JMB selected the trials, with the involvement of IFN when necessary. MBS and JJ judged the risk of bias, with the involvement of IFN when necessary. MBS and IFN did the translations. MBS, JMB, and KVF extracted the data. MBS performed the analyses, under supervision of JMB. All the authors participated in interpreting of the results. MBS drafted the manuscript, and subsequently revised it, based on comments by RABLM, HS, and all the other authors. All the authors read and accepted the final version of the manuscript.



1  
2  
3  
4  
5  
6  
7  
8  
9  
10  
11  
12  
13  
14  
15  
16  
17  
18  
19  
20  
21  
22  
23  
24  
25  
26  
27  
28  
29  
30  
31  
32  
33  
34  
35  
36  
37  
38  
39  
40  
41  
42  
43  
44  
45  
46  
47  
48  
49  
50  
51  
52  
53  
54  
55  
56  
57  
58  
59  
60

**Funding:** The University of Bergen funded this research. No specific grant from any funding agency in the public, commercial, or not-for-profit sectors was received for this work. The corresponding author had full access to all data in the study and had the final responsibility for the decision to submit for publication.

**Competing interests:** JMB and RABLM are post-presidents and former board members of World Association for Laser Therapy, a non-for-profit research organization from which they have never received funding, grants, or fees. The other authors declared that they had no conflict of interests related to this work.

**Ethical approval:** Not required.

**Data sharing:** The dataset for meta-analysis is available from the corresponding author upon reasonable request. The corresponding author affirms that the manuscript is an honest, accurate, and transparent account of the study being reported; that no important aspects of the study have been omitted; and that any discrepancies from the study as planned (and, if relevant, registered) have been explained.

1. Heidari B. Knee osteoarthritis prevalence, risk factors, pathogenesis and features - Part 1. *Caspian J Intern Med* 2011;2:205-12.
2. Berenbaum F. Osteoarthritis as an inflammatory disease (osteoarthritis is not osteoarthrosis!). *Osteoarthritis cartilage / OARS, Osteoarthritis Research Society* 2013;21:16-21. doi: 10.1016/j.joca.2012.11.012
3. Bartels EM, Juhl CB, Christensen R, et al. Aquatic exercise for the treatment of knee and hip osteoarthritis. *Cochrane Database Syst Rev* 2016;3:CD005523. doi: 10.1002/14651858.CD005523.pub3
4. Juhl C, Christensen R, Roos EM, et al. Impact of exercise type and dose on pain and disability in knee osteoarthritis: A systematic review and meta-regression analysis of randomized controlled trials. *Arthritis Rheumatol* 2014;66:622-36. doi: 10.1002/art.38290
5. Rannou F, Pelletier JP, Martel-Pelletier J. Efficacy and safety of oral NSAIDs and analgesics in the management of osteoarthritis: Evidence from real-life setting trials and surveys. *Semin Arthritis Rheum* 2016;45:22-7. doi: 10.1016/j.semarthrit.2015.11.009 [published Online First: 2016/01/26]
6. Bannuru RR, Schmid CH, Kent DM, et al. Comparative effectiveness of pharmacologic interventions for knee osteoarthritis: A systematic review and network meta-analysis. *Ann Intern Med* 2015;162:46-54. doi: 10.7326/m14-1231 [published Online First: 2015/01/07]
7. Scott DL, Berry H, Capell H, et al. The long-term effects of non-steroidal anti-inflammatory drugs in osteoarthritis of the knee: A randomized placebo-controlled trial. *Rheumatology (Oxford, England)* 2000;39:1095-101. [published Online First: 2000/10/18]
8. Rayegani SM, Raeissadat SA, Heidari S, et al. Safety and effectiveness of low-level laser therapy in patients with knee osteoarthritis: A systematic review and meta-analysis. *J Lasers Med Sci* 2017;8:12-19.
9. Hamblin MR. Can osteoarthritis be treated with light? *Arthritis Res Ther* 2013;15(5):120. doi: 10.1186/ar4354 [published Online First: 2013/11/30]
10. Tomazoni SS, Leal-Junior ECP, Pallotta RC, et al. Effects of photobiomodulation therapy, pharmacological therapy, and physical exercise as single and/or combined treatment on the inflammatory response induced by experimental osteoarthritis. *Lasers med sci* 2017;32:101-08. doi: <http://dx.doi.org/10.1007/s10103-016-2091-8>
11. Tomazoni SS, Leal-Junior EC, Frigo L, et al. Isolated and combined effects of photobiomodulation therapy, topical nonsteroidal anti-inflammatory drugs, and physical activity in the treatment of osteoarthritis induced by papain. *J Biomed Opt* 2016;21(10) doi: 10.1117/1.JBO.21.10.108001 [published Online First: 2016/10/19]
12. Wang P, Liu C, Yang X, et al. Effects of low-level laser therapy on joint pain, synovitis, anabolic, and catabolic factors in a progressive osteoarthritis rabbit model. *Lasers med sci* 2014;29(6):1875-85. doi: 10.1007/s10103-014-1600-x [published Online First: 2014/06/04]
13. Assis L, Almeida T, Milares LP, et al. Musculoskeletal Atrophy in an Experimental Model of Knee Osteoarthritis: The Effects of Exercise Training and Low-Level Laser Therapy. *Am J Phys Med Rehabil* 2015;94(8):609-16. doi: 10.1097/phm.0000000000000219 [published Online First: 2014/10/10]
14. Pallotta RC, Bjordal JM, Frigo L, et al. Infrared (810-nm) low-level laser therapy on rat experimental knee inflammation. *Lasers med sci* 2012;27(1):71-78. doi: <http://dx.doi.org/10.1007/s10103-011-0906-1>
15. Geenen R, Overman CL, Christensen R, et al. EULAR recommendations for the health professional's approach to pain management in inflammatory arthritis and osteoarthritis. *Ann Rheum Dis* 2018;77(6):797-807. doi: 10.1136/annrheumdis-2017-212662
16. Collins NJ, Hart HF, Mills KAG. OARSI year in review 2018: Rehabilitation and outcomes. *Osteoarthritis cartilage / OARS, Osteoarthritis Research Society* 2018: Published online 7. dec. 2018. doi.org/10.1016/j.joca.2018.11.010. doi: 10.1016/j.joca.2018.11.010 [published Online First: 2018/12/12]

17. Huang Z, Chen J, Ma J, et al. Effectiveness of low-level laser therapy in patients with knee osteoarthritis: A systematic review and metaanalysis. *Osteoarthritis Cartilage* 2015;23:1437-44.
18. Gworys K, Gasztych J, Puzder A, et al. Influence of various laser therapy methods on knee joint pain and function in patients with knee osteoarthritis. *Ortop Traumatol Rehabil* 2012;14:269-77. doi: 10.5604/15093492.1002257
19. Nivbrant B, Friberg S. Laser tycks ha effekt pa knaledsartros men vetenskapligt bevis saknas [Swedish]. *Lakartidningen [Journal of the Swedish Medical Association]* 1992;89:859-61.
20. Bülow PM, Jensen H, Danneskiold-Samsøe B. Low power Ga-Al-As laser treatment of painful osteoarthritis of the knee. A double-blind placebo-controlled study. *Scand J Rehabil Med* 1994;26:155-9.
21. Jensen H, Harreby M, Kjer J. Infrarød laser -- effekt ved smertende knæartrose? [Danish]. *Ugeskr Laeger* 1987;149:3104-06.
22. Stausholm MB, Bjordal JM, Lopes-Martins RAB, et al. Methodological flaws in meta-analysis of low-level laser therapy in knee osteoarthritis: A letter to the editor. *Osteoarthritis cartilage / OARS, Osteoarthritis Research Society* 2016;25:e9-e10. doi: 10.1016/j.joca.2016.09.022 [published Online First: 2016/11/07]
23. Bagheri SR, Fatemi E, Fazeli SH, et al. Efficacy of low level laser on knee osteoarthritis treatment [Persian]. *Koomesh* 2011;12:285-92.
24. WALT. Recommended treatment doses for Low Level Laser Therapy 780-860 nm wavelength: *World Association for Laser Therapy*; 2010 [Available from: [http://waltza.co.za/wp-content/uploads/2012/08/Dose\\_table\\_780-860nm\\_for\\_Low\\_Level\\_Laser\\_Therapy\\_WALT-2010.pdf](http://waltza.co.za/wp-content/uploads/2012/08/Dose_table_780-860nm_for_Low_Level_Laser_Therapy_WALT-2010.pdf)].
25. WALT. Recommended treatment doses for Low Level Laser Therapy 904 nm wavelength: *World Association for Laser Therapy*; 2010 [Available from: [http://waltza.co.za/wp-content/uploads/2012/08/Dose\\_table\\_904nm\\_for\\_Low\\_Level\\_Laser\\_Therapy\\_WALT-2010.pdf](http://waltza.co.za/wp-content/uploads/2012/08/Dose_table_904nm_for_Low_Level_Laser_Therapy_WALT-2010.pdf)].
26. Joensen J, Ovsthus K, Reed RK, et al. Skin penetration time-profiles for continuous 810 nm and Superpulsed 904 nm lasers in a rat model. *Photomed laser surg* 2012;30:688-94. doi: 10.1089/pho.2012.3306 [published Online First: 2012/10/03]
27. Moher DLAT, J.; Altman, DG. Preferred Reporting Items for Systematic Reviews and Meta-Analyses: The PRISMA Statement: *PLoS Med* 2009.
28. Bjordal JM, Johnson MI, Lopes-Martins RA, et al. Short-term efficacy of physical interventions in osteoarthritic knee pain: A systematic review and meta-analysis of randomised placebo-controlled trials. *BMC musculoskeletal disord* 2007;8:51. doi: 10.1186/1471-2474-8-51 [published Online First: 2007/06/26]
29. Alfredo PP, Bjordal JM, Dreyer SH, et al. Efficacy of low level laser therapy associated with exercises in knee osteoarthritis: A randomized double-blind study. *Clin rehabil* 2011;26:523-33. doi: 10.1177/0269215511425962 [published Online First: 2011/12/16]
30. Fukuda VO, Fukuda TY, Guimaraes M, et al. Short-term efficacy of low-level laser therapy in patients with knee osteoarthritis: A randomized placebo-controlled, double-blind clinical trial. *Rev Bras Ortop* 2011;46:526-33. doi: 10.1016/s2255-4971(15)30407-9 [published Online First: 2011/09/01]
31. Al Rashoud AS, Abboud RJ, Wang W, et al. Efficacy of low-level laser therapy applied at acupuncture points in knee osteoarthritis: A randomised double-blind comparative trial. *Physiotherapy* 2014;100(3):242-48. doi: 10.1016/j.physio.2013.09.007
32. Alghadir A, Omar MT, Al-Askar AB, et al. Effect of low-level laser therapy in patients with chronic knee osteoarthritis: A single-blinded randomized clinical study. *Lasers med sci* 2014;29:749-55. doi: 10.1007/s10103-013-1393-3
33. Gur A, Cosut A, Sarac AJ, et al. Efficacy of different therapy regimes of low-power laser in painful osteoarthritis of the knee: A double-blind and randomized-controlled trial. *Lasers surg med* 2003;33:330-38.
34. Tunér J, Hode L. The new laser therapy handbook: A guide for research scientists, doctors, dentists, veterinarians and other interested parties within the medical field. *Grängesberg: Prima Books* 2010.
35. Higgins JPT, Green S. *Cochrane Handbook for Systematic Reviews of Interventions* 2011 [Available from: <http://handbook.cochrane.org/> accessed 3.12. 2015].
36. Juhl C, Lund H, Roos EM, et al. A hierarchy of patient-reported outcomes for meta-analysis of knee osteoarthritis trials: Empirical evidence from a survey of high impact journals. *Arthritis* 2012 doi: 10.1155/2012/136245
37. Bolognese JA, Schnitzer TJ, Ehrich EW. Response relationship of VAS and Likert scales in osteoarthritis efficacy measurement. *Osteoarthritis Cartilage* 2003;11:499-507. doi: 10.1016/s1063-4584(03)00082-7
38. Higgins JP, Thompson SG, Deeks JJ, et al. Measuring inconsistency in meta-analyses. *BMJ* 2003;327:557-60. doi: 10.1136/bmj.327.7414.557 [published Online First: 2003/09/06]

- 1
  - 2
  - 3
  - 4
  - 5
  - 6
  - 7
  - 8
  - 9
  - 10
  - 11
  - 12
  - 13
  - 14
  - 15
  - 16
  - 17
  - 18
  - 19
  - 20
  - 21
  - 22
  - 23
  - 24
  - 25
  - 26
  - 27
  - 28
  - 29
  - 30
  - 31
  - 32
  - 33
  - 34
  - 35
  - 36
  - 37
  - 38
  - 39
  - 40
  - 41
  - 42
  - 43
  - 44
  - 45
  - 46
  - 47
  - 48
  - 49
  - 50
  - 51
  - 52
  - 53
  - 54
  - 55
  - 56
  - 57
  - 58
  - 59
  - 60
39. Delkhosh CT, Fatemy E, Ghorbani R, et al. Comparing the immediate and long-term effects of low and high power laser on the symptoms of knee osteoarthritis [Persian]. *Journal of mazandaran university of medical sciences* 2018;28(165):69-77.
40. Tascioglu F, Armagan O, Tabak Y, et al. Low power laser treatment in patients with knee osteoarthritis. *Swiss Med Wkly* 2004;134:254-8. doi: 2004/17/smw-10518 [published Online First: 2004/07/10]
41. Hinman RS, McCrory P, Pirota M, et al. Acupuncture for chronic knee pain: A randomized clinical trial. *The JAMA* 2014;312:1313-22. doi: 10.1001/jama.2014.12660
42. Youssef EF, Muaidi QI, Shanb AA. Effect of Laser Therapy on Chronic Osteoarthritis of the Knee in Older Subjects. *Lasers Med Sci* 2016;7:112-9. doi: 10.15171/jlms.2016.19 [published Online First: 2016/06/23]
43. Rayegani SM, Bahrami MH, Elyaspour D, et al. Therapeutic Effects of Low Level Laser Therapy (LLLT) in Knee Osteoarthritis, Compared to Therapeutic Ultrasound. *Lasers Med Sci* 2012;3:71-74.
44. Alfredo PP, Bjordal JM, Junior WS, et al. Long-term results of a randomized, controlled, double-blind study of low-level laser therapy before exercises in knee osteoarthritis: Laser and exercises in knee osteoarthritis. *Clin rehabil* 2018;32:173-78. doi: 10.1177/0269215517723162 [published Online First: 2017/08/05]
45. Hegedus B, Viharos L, Gervain M, et al. The effect of low-level laser in knee osteoarthritis: A double-blind, randomized, placebo-controlled trial. *Photomed laser surg* 2009;27:577-84.
46. Helianthi DR, Simadibrata C, Srilestari A, et al. Pain Reduction After Laser Acupuncture Treatment in Geriatric Patients with Knee Osteoarthritis: A Randomized Controlled Trial. *Acta Med Indones* 2016;48:114-21. [published Online First: 2016/08/24]
47. Kheshie AR, Alayat MS, Ali MM. High-intensity versus low-level laser therapy in the treatment of patients with knee osteoarthritis: A randomized controlled trial. *Lasers med sci* 2014;29:1371-6. doi: 10.1007/s10103-014-1529-0
48. Koutenaei FR, Mosallanezhad Z, Naghikhani M, et al. The Effect of Low Level Laser Therapy on Pain and Range of Motion of Patients With Knee Osteoarthritis. *Physical Treatments - Specific Physical Therapy* 2017;7(1):13-18. doi: 10.29252/nrip.ptj.7.1.13
49. Mohammed N, Allam H, Elghoroury E, et al. Evaluation of serum beta-endorphin and substance P in knee osteoarthritis patients treated by laser acupuncture. *J Complement Integr Med* 2018;15 doi: <http://dx.doi.org/10.1515/jcim-2017-0010>
50. Nambi SG, Kamal W, George J, et al. Radiological and biochemical effects (CTX-II, MMP-3, 8, and 13) of low-level laser therapy (LLLT) in chronic osteoarthritis in Al-Kharj, Saudi Arabia. *Lasers Med Sci* 2016;32 doi: 10.1007/s10103-016-2114-5 [published Online First: 2016/12/04]
51. Tubach F, Ravaud P, Baron G, et al. Evaluation of clinically relevant changes in patient reported outcomes in knee and hip osteoarthritis: The minimal clinically important improvement. *Ann Rheum Dis* 2005;64:29-33. doi: 10.1136/ard.2004.022905
52. Lopes-Martins RAB, Marcos RL, Leal-Junior ECP, et al. Low-Level Laser Therapy and World Association for Laser Therapy Dosage Recommendations in Musculoskeletal Disorders and Injuries. *Photomed laser surg* 2018;36:457-59. doi: 10.1089/pho.2018.4493 [published Online First: 2018/09/07]
53. Yurtkuran M, Alp A, Konur S, et al. Laser acupuncture in knee osteoarthritis: A double-blind, randomized controlled study. *Photomed laser surg* 2007;25:14-20. doi: 10.1089/pho.2006.1093

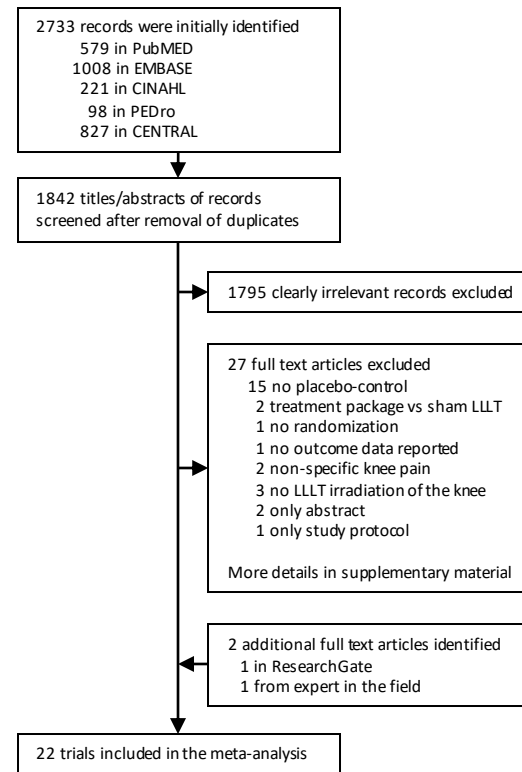

1  
2  
3  
4  
5  
6  
7  
8  
9  
10  
11  
12  
13  
14  
15  
16  
17  
18  
19  
20  
21  
22  
23  
24  
25  
26  
27  
28  
29  
30  
31  
32  
33  
34  
35  
36  
37  
38  
39  
40  
41  
42  
43  
44  
45  
46  
47  
48  
49  
50  
51  
52  
53  
54  
55  
56  
57  
58  
59  
60

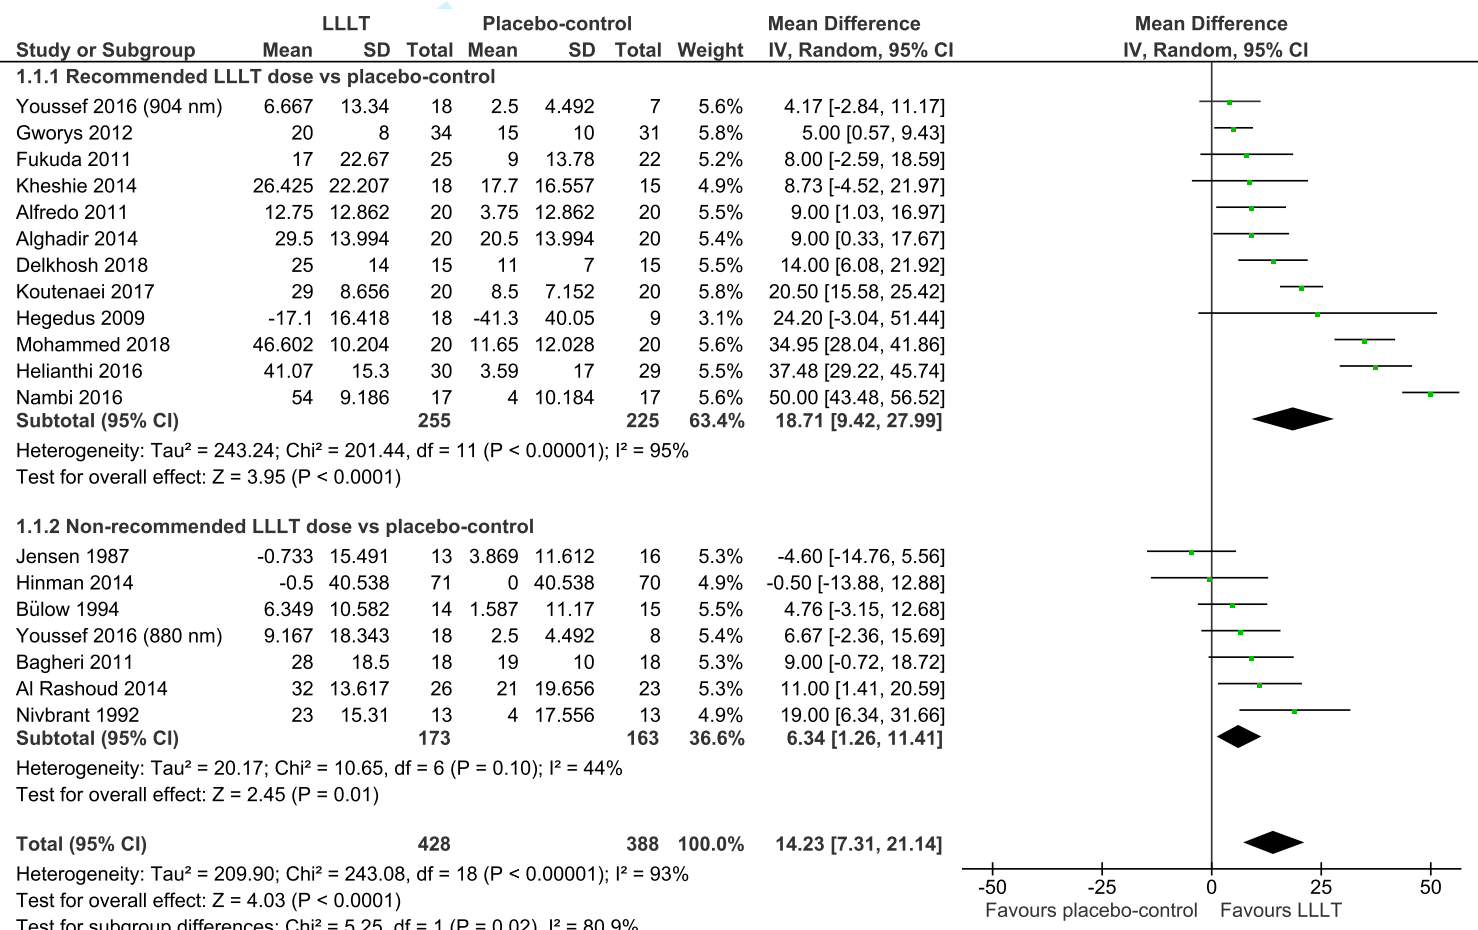

1  
2  
3  
4  
5  
6  
7  
8  
9  
10  
11  
12  
13  
14  
15  
16  
17  
18  
19  
20  
21  
22  
23  
24  
25  
26  
27  
28  
29  
30  
31  
32  
33  
34  
35  
36  
37  
38  
39  
40  
41  
42  
43  
44  
45  
46  
47  
48  
49  
50  
51  
52  
53  
54  
55  
56  
57  
58  
59  
60

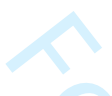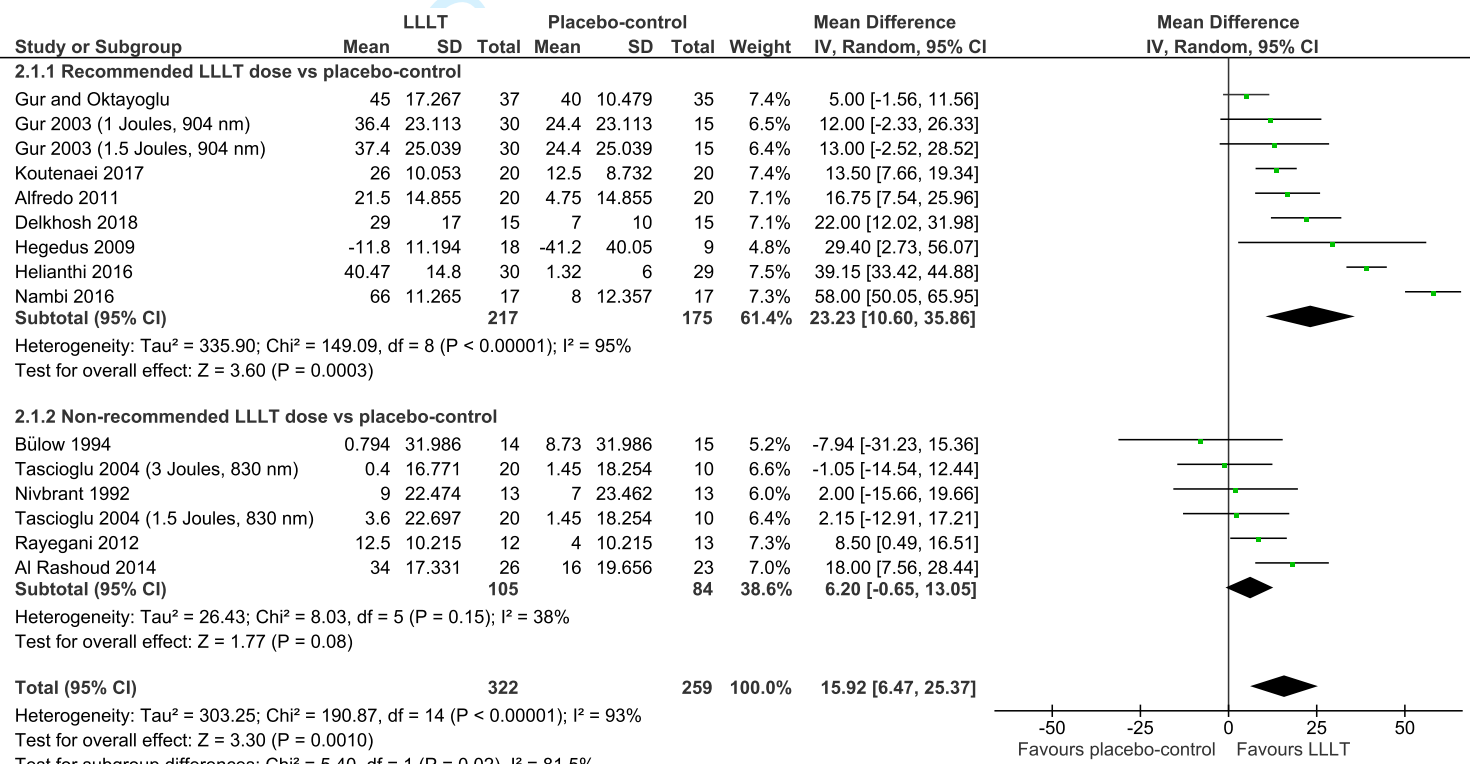

1  
2  
3  
4  
5  
6  
7  
8  
9  
10  
11  
12  
13  
14  
15  
16  
17  
18  
19  
20  
21  
22  
23  
24  
25  
26  
27  
28  
29  
30  
31  
32  
33  
34  
35  
36  
37  
38  
39  
40  
41  
42  
43  
44  
45  
46  
47  
48  
49  
50  
51  
52  
53  
54  
55  
56  
57  
58  
59  
60

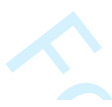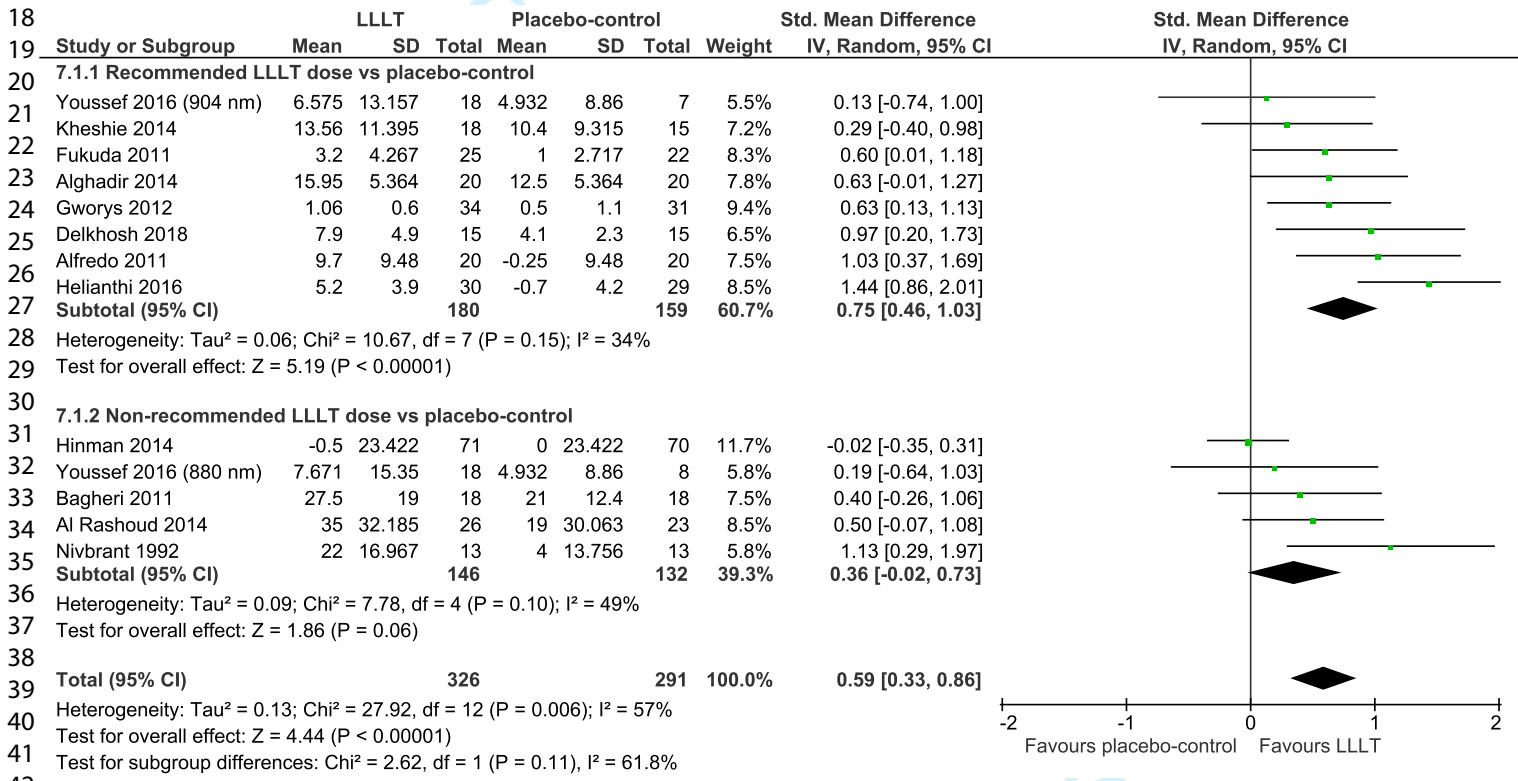



1  
2  
3  
4  
5  
6  
7  
8  
9  
10  
11  
12  
13  
14  
15  
16  
17  
18  
19  
20  
21  
22  
23  
24  
25  
26  
27  
28  
29  
30  
31  
32  
33  
34  
35  
36  
37  
38  
39  
40  
41  
42  
43  
44  
45  
46  
47  
48  
49  
50  
51  
52  
53  
54  
55  
56  
57  
58  
59  
60

FOR

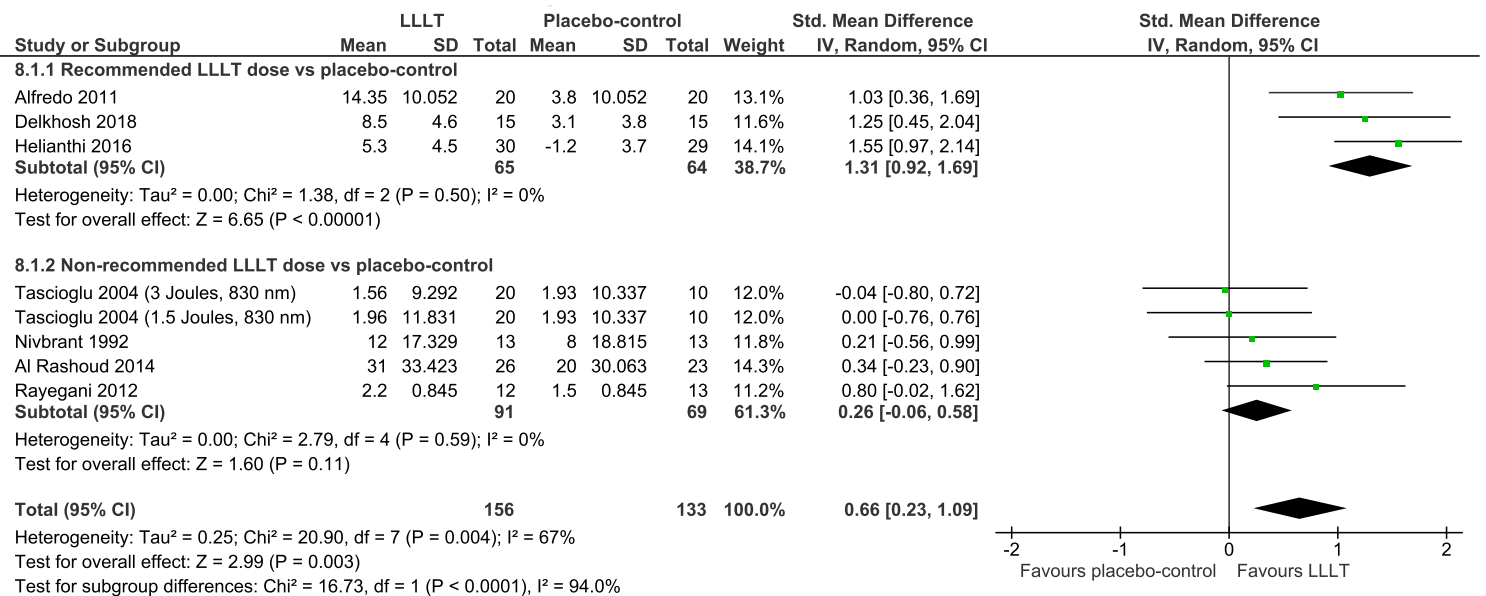

1111



1  
2  
3  
4  
5  
6  
7  
8  
9  
10  
11  
12  
13  
14  
15  
16  
17  
18  
19  
20  
21  
22  
23  
24  
25  
26  
27  
28  
29  
30  
31  
32  
33  
34  
35  
36  
37  
38  
39  
40  
41  
42  
43  
44  
45  
46  
47  
48  
49  
50  
51  
52  
53  
54  
55  
56  
57  
58  
59  
60

|                   | Random sequence generation (selection bias) | Allocation concealment (selection bias) | Blinding (performance bias) | Blinding of outcome assessment (detection bias) | Incomplete outcome data (attrition bias) | Selective reporting (reporting bias) |
|-------------------|---------------------------------------------|-----------------------------------------|-----------------------------|-------------------------------------------------|------------------------------------------|--------------------------------------|
| Jensen 1987       | ?                                           | ?                                       | ?                           | +                                               | +                                        | +                                    |
| Hinman 2014       | +                                           | +                                       | +                           | +                                               | +                                        | +                                    |
| Tascioglu 2004    | +                                           | ?                                       | +                           | +                                               | +                                        | +                                    |
| Bülow 1994        | ?                                           | ?                                       | +                           | +                                               | +                                        | +                                    |
| Gworys 2012       | ?                                           | ?                                       | ?                           | +                                               | +                                        | +                                    |
| Gur and Oktayoglu | +                                           | ?                                       | +                           | +                                               | +                                        | +                                    |
| Youssef 2016      | +                                           | +                                       | ?                           | +                                               | +                                        | +                                    |
| Fukuda 2011       | +                                           | +                                       | +                           | +                                               | +                                        | +                                    |
| Rayegani 2012     | +                                           | ?                                       | +                           | +                                               | ?                                        | +                                    |
| Kheshie 2014      | +                                           | +                                       | +                           | +                                               | +                                        | +                                    |
| Bagheri 2011      | ?                                           | ?                                       | +                           | +                                               | +                                        | +                                    |
| Alfredo 2011      | +                                           | +                                       | +                           | +                                               | +                                        | +                                    |
| Alghadir 2014     | +                                           | +                                       | +                           | +                                               | +                                        | +                                    |
| Al Rashoud 2014   | +                                           | +                                       | +                           | +                                               | +                                        | +                                    |
| Gur 2003          | +                                           | ?                                       | +                           | +                                               | +                                        | +                                    |
| Delkhosh 2018     | +                                           | ?                                       | +                           | +                                               | ?                                        | +                                    |
| Nivbrant 1992     | +                                           | ?                                       | +                           | +                                               | +                                        | +                                    |
| Koutenaei 2017    | +                                           | +                                       | +                           | +                                               | ?                                        | +                                    |
| Hegedus 2009      | +                                           | +                                       | +                           | +                                               | +                                        | +                                    |
| Mohammed 2018     | ?                                           | ?                                       | +                           | +                                               | ?                                        | +                                    |
| Helianthi 2016    | +                                           | +                                       | ?                           | +                                               | +                                        | +                                    |
| Nambi 2016        | +                                           | +                                       | +                           | +                                               | +                                        | +                                    |

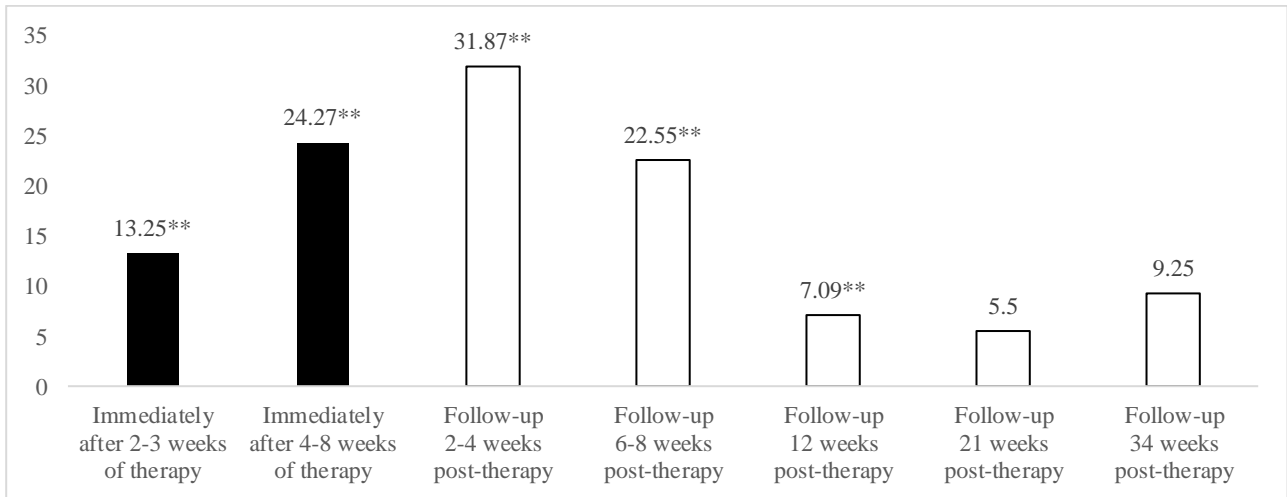

**Supplementary material for the article by Stausholm et al. entitled  
*Efficacy of low-level laser therapy on pain and disability in knee osteoarthritis:  
 A systematic review and meta-analysis of randomized placebo-controlled trials***

**Table of content**

|                                                                             |    |
|-----------------------------------------------------------------------------|----|
| Excluded articles .....                                                     | 1  |
| Pain time-effect profile of LLLT .....                                      | 2  |
| Publication and small study bias assessment .....                           | 3  |
| Risk of bias impact analysis .....                                          | 5  |
| Support for risk of bias judgments and funding of the included trials ..... | 9  |
| LLLT with and without exercise therapy .....                                | 16 |
| Mean Difference vs Standardized Mean Difference .....                       | 17 |
| References .....                                                            | 19 |

**Excluded articles**

Table 1 | Excluded articles initially judged potentially eligible

| First author                     | Reason for exclusion                             |
|----------------------------------|--------------------------------------------------|
| Alayat 2017 <sup>1</sup>         | HILT, not LLLT                                   |
| Ciechanowska 2008 <sup>2</sup>   | No placebo-control                               |
| Coelho <sup>3</sup>              | Only study protocol                              |
| de Matos 2018 <sup>4</sup>       | No placebo-control                               |
| de Meneses <sup>5</sup>          | Full-text not available (emailed)                |
| de Paula 2018 <sup>6</sup>       | NBLT + LLLT vs sham LLLT alone                   |
| Giavelli 1998 <sup>7</sup>       | No placebo-control                               |
| Götte 1995 <sup>8</sup>          | No outcome data reported                         |
| Kujawa 2004 <sup>9</sup>         | No placebo-control                               |
| Leal-Junior 2014 <sup>10</sup>   | Non-specific knee pain                           |
| Lepilina 1990 <sup>11</sup>      | No placebo-control                               |
| Marquina 2012 <sup>12</sup>      | Non-specific knee pain                           |
| Montes-Molina 2009 <sup>13</sup> | No placebo-control                               |
| Nakamura 2014 <sup>14</sup>      | No placebo-control                               |
| Paolillo 2018 <sup>15</sup>      | No placebo-control                               |
| Pinfildi <sup>16</sup>           | Full-text not available (emailed)                |
| Ren 2010 <sup>17</sup>           | No placebo-control                               |
| Shen 2009 <sup>18</sup>          | LLLT + moxibustion vs sham LLLT alone            |
| Soleimanpour 2014 <sup>19</sup>  | No placebo-control                               |
| Stelian 1992 <sup>20</sup>       | NBLT, not laser                                  |
| Trelles 1991 <sup>21</sup>       | No placebo-control                               |
| Wang 2013 <sup>22</sup>          | No randomization                                 |
| Yavuz 2013 <sup>23</sup>         | No placebo-control                               |
| Yurtkuran 2006 <sup>24</sup>     | Irradiated acupoint spleen 9, not the knee joint |
| Yuvarani 2018 <sup>25</sup>      | No placebo-control                               |
| Zhao 2010 <sup>26</sup>          | No placebo-control                               |
| Zou 2017 <sup>27</sup>           | No placebo-control                               |

NBLT = narrow-band light therapy; LLLT = low-level laser therapy; HILT = high intensity laser therapy; ACR = American College of Rheumatology; K/L = Kellgren/Lawrence.

**Pain time-effect profile of LLLT**

Analyses were performed to estimate the pain time-effect profile of the recommended LLLT doses by imputing the results of the trials with these doses in subgroups with narrower time intervals (fig 1).

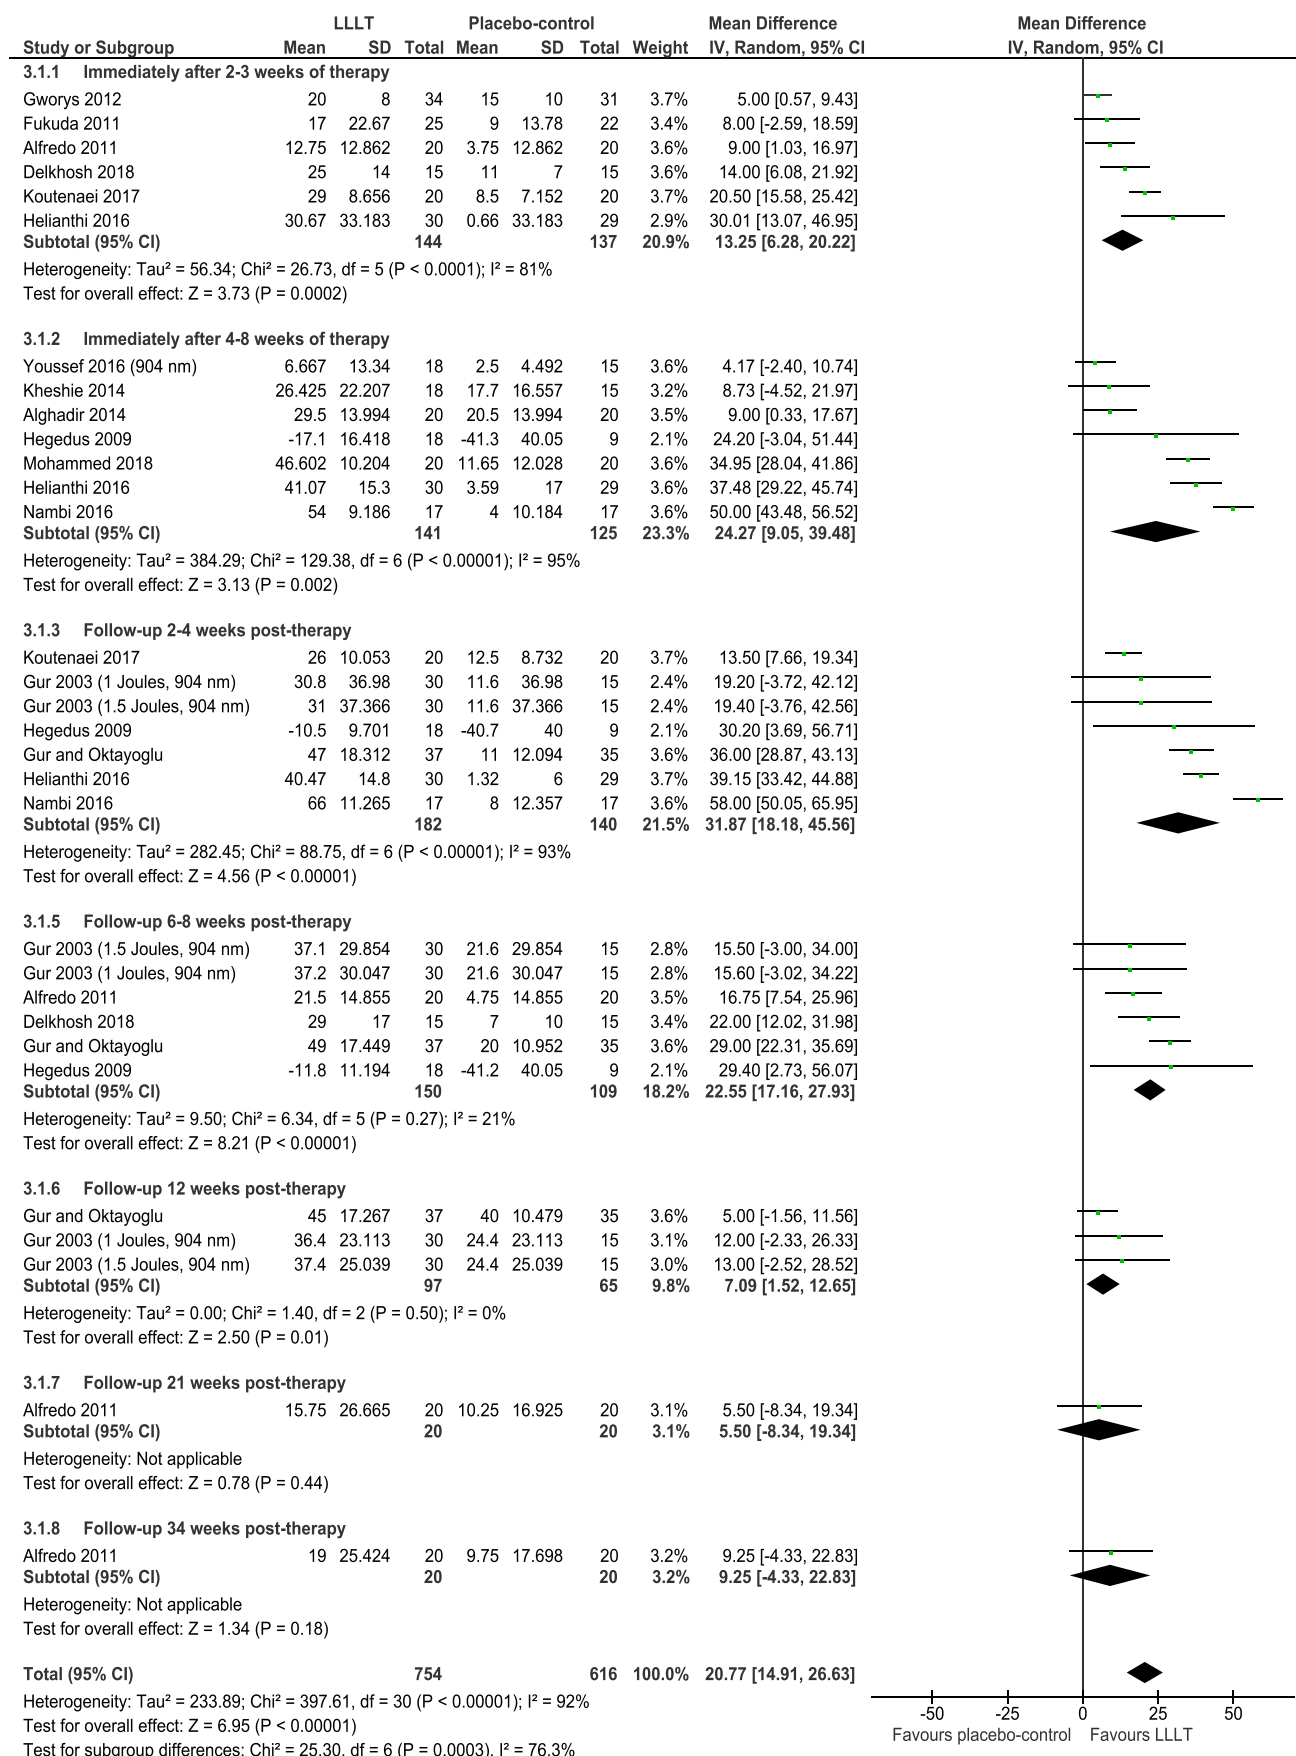

Fig 1 | Pain time-effect profile (recommended LLLT doses vs placebo-control)

**Publication and small study bias assessment**

Funnel plots were performed using the results from the main analyses (immediately after the end of therapy, primarily). There were no clear indications of publication bias (fig 2-3). Moreover, a subsequent change from random to fixed effects models only caused a slight change in point effect estimates: Pain results from 13.22 to 14.14 mm VAS (fig 4-5) and disability from 0.57 to 0.48 (SMD) (fig 6-7).

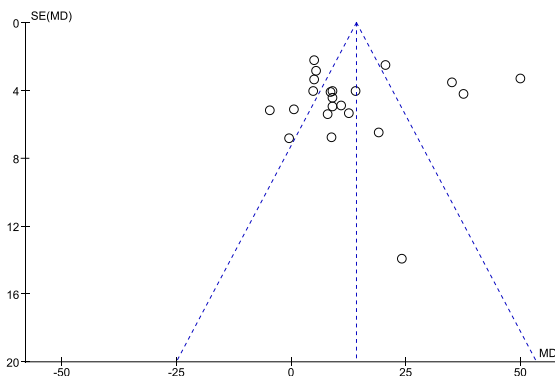

Fig 2 | Funnel plot (pain)

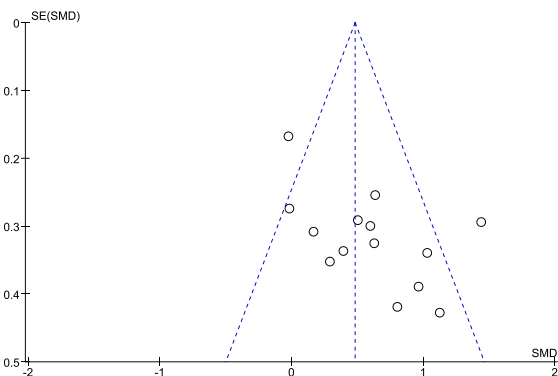

Fig 3 | Funnel plot (disability)

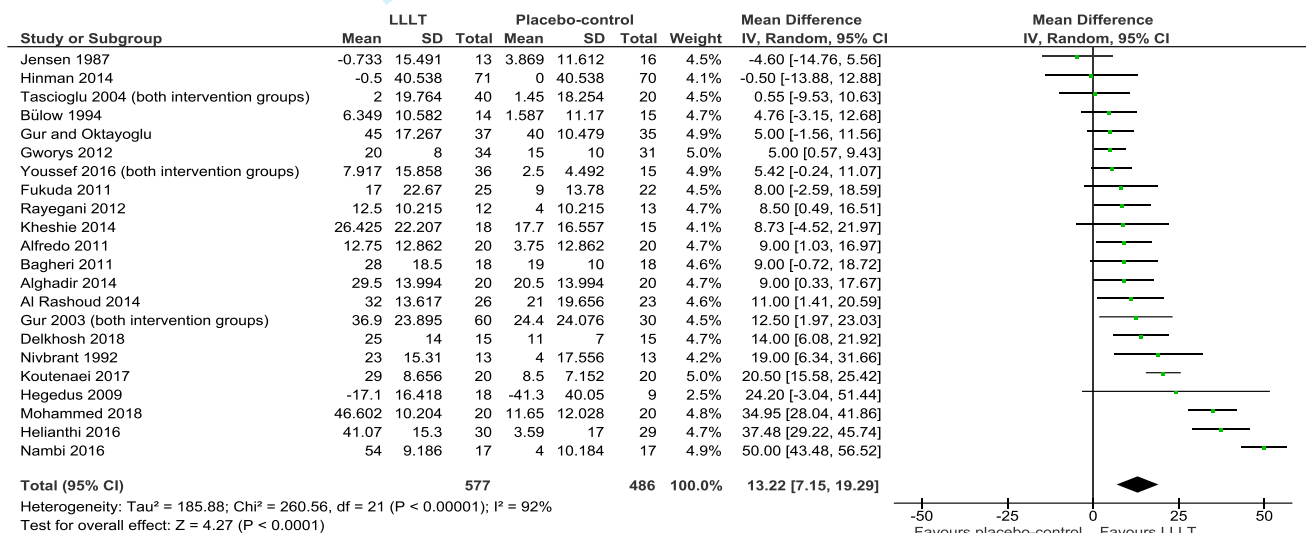

Fig 4 | Random effects model (pain)

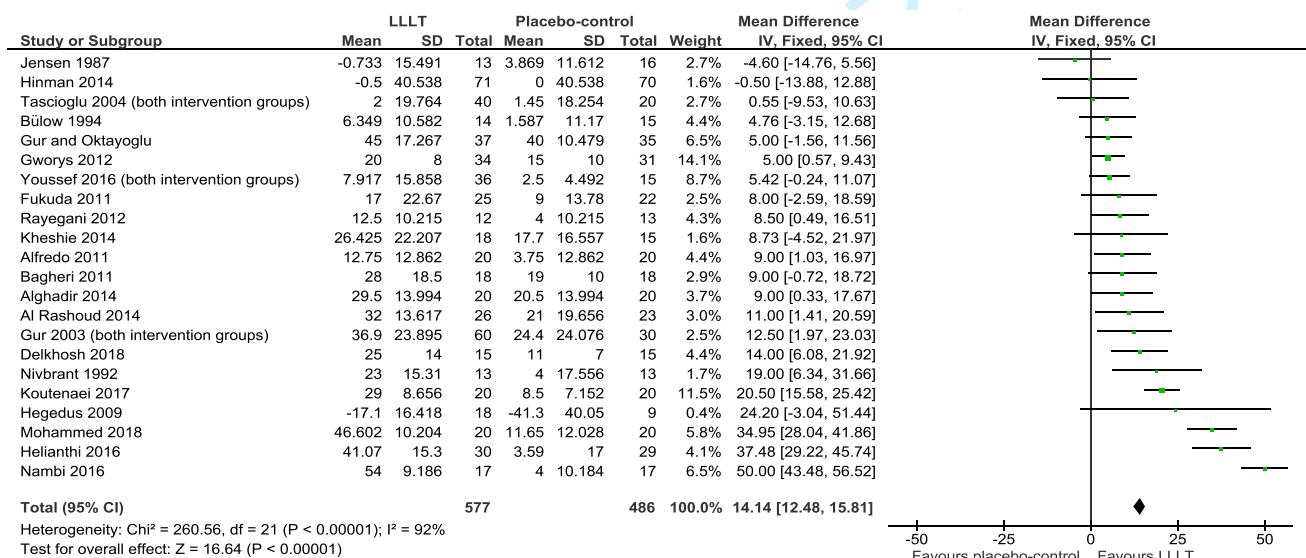

Fig 5 | Fixed effects model (pain)

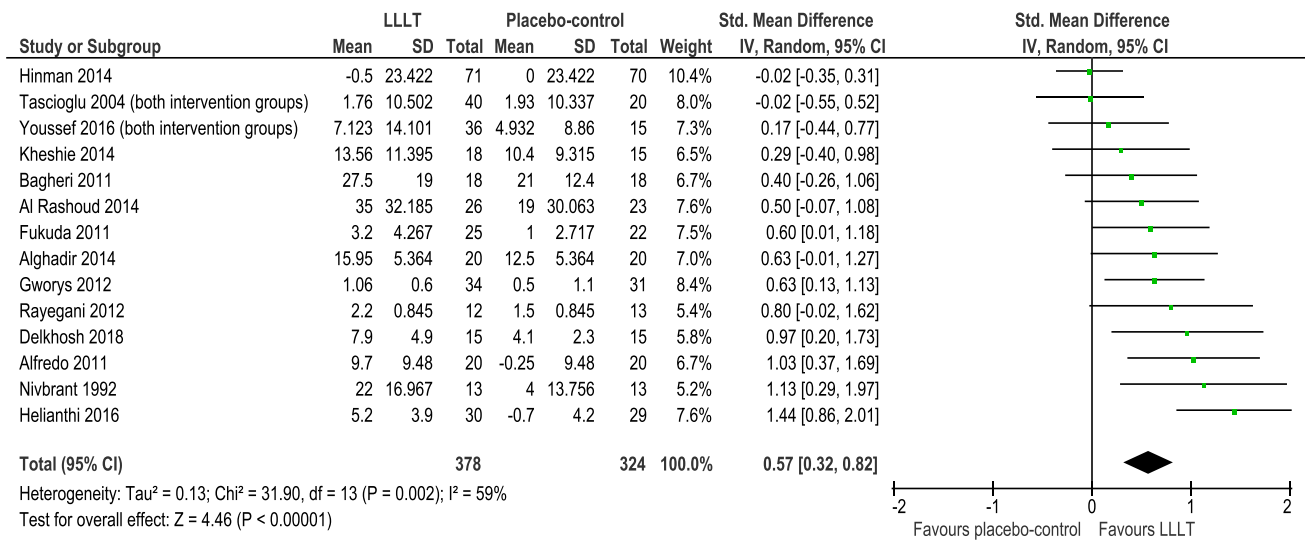

Fig 6 | Random effects model (disability)

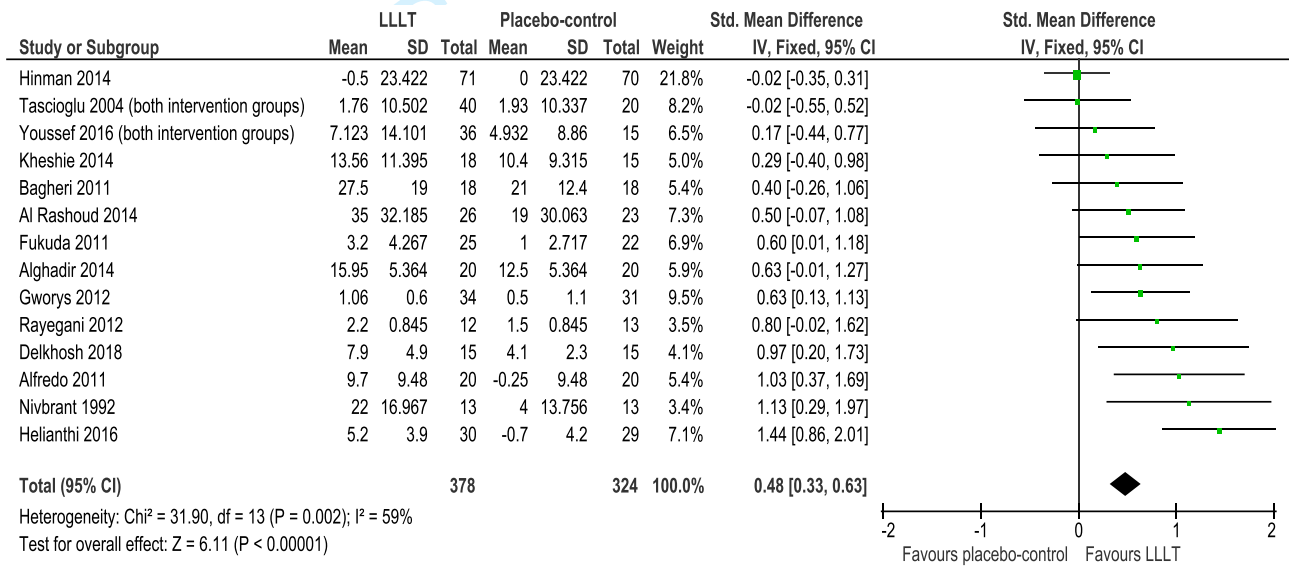

Fig 7 | Fixed effects model (disability)

## Risk of bias impact analysis

Risk of bias impact analyses were performed using the results from the main analyses (immediately after the end of therapy, primarily). The mean statistical heterogeneity of the subgroup analyses were similar to the overall levels (fig 8-15).

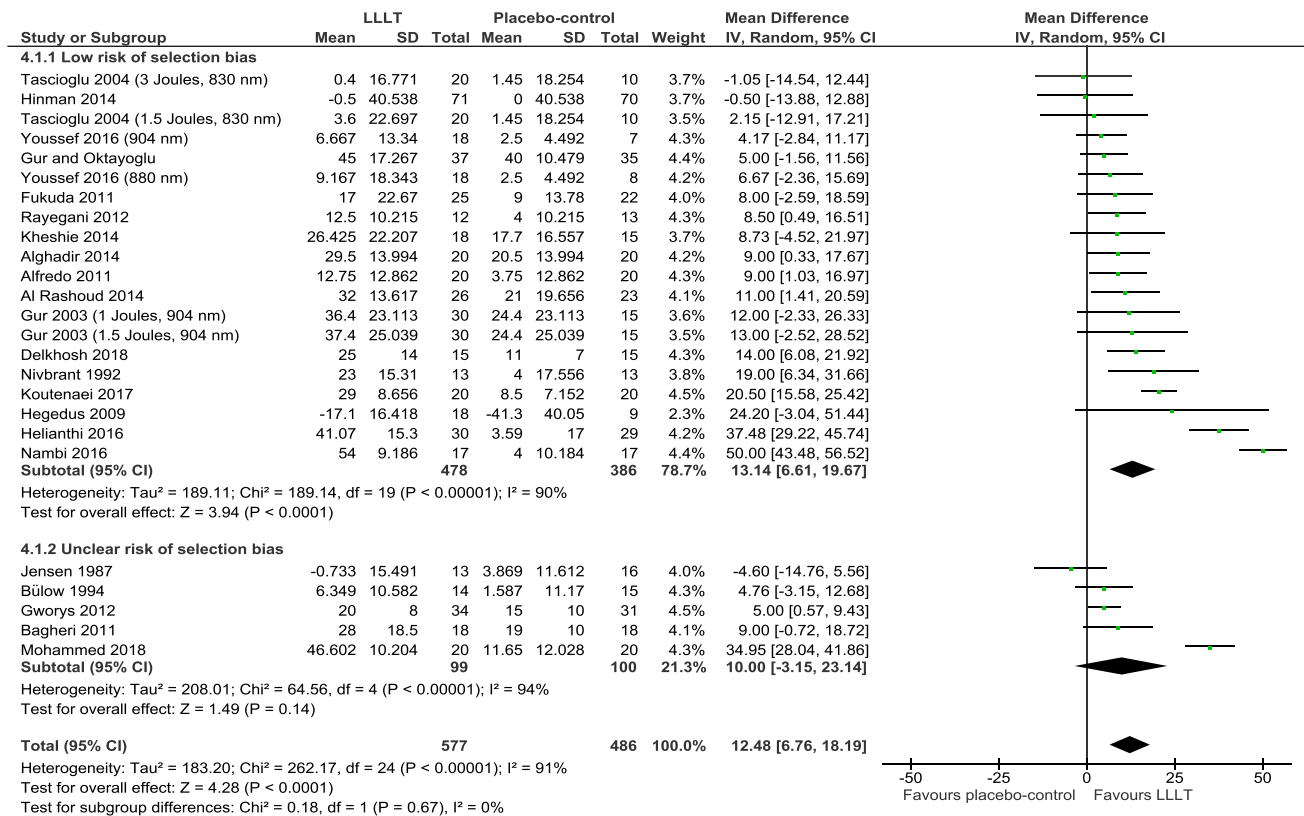

Fig 8 | Pain results - risk of selection bias (random sequence generation)

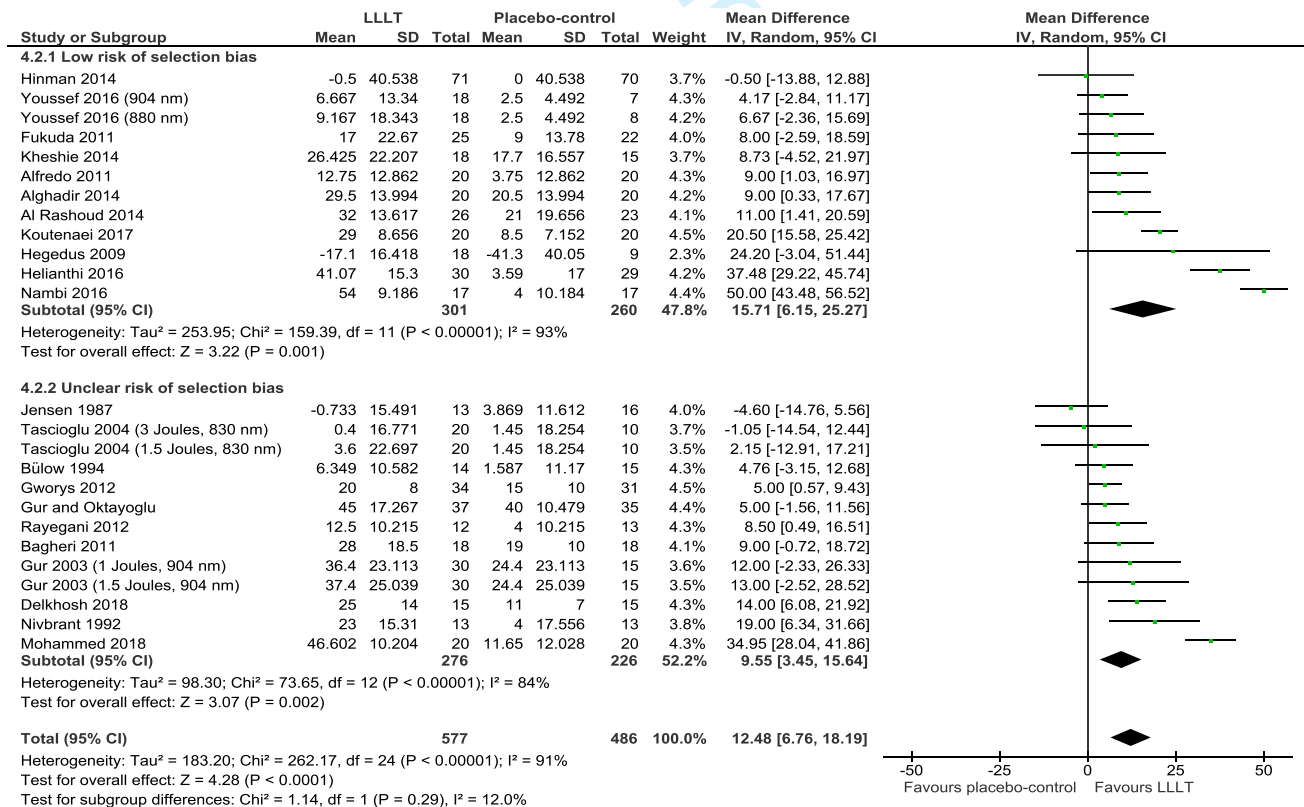

Fig 9 | Pain results - risk of selection bias (allocation concealment)



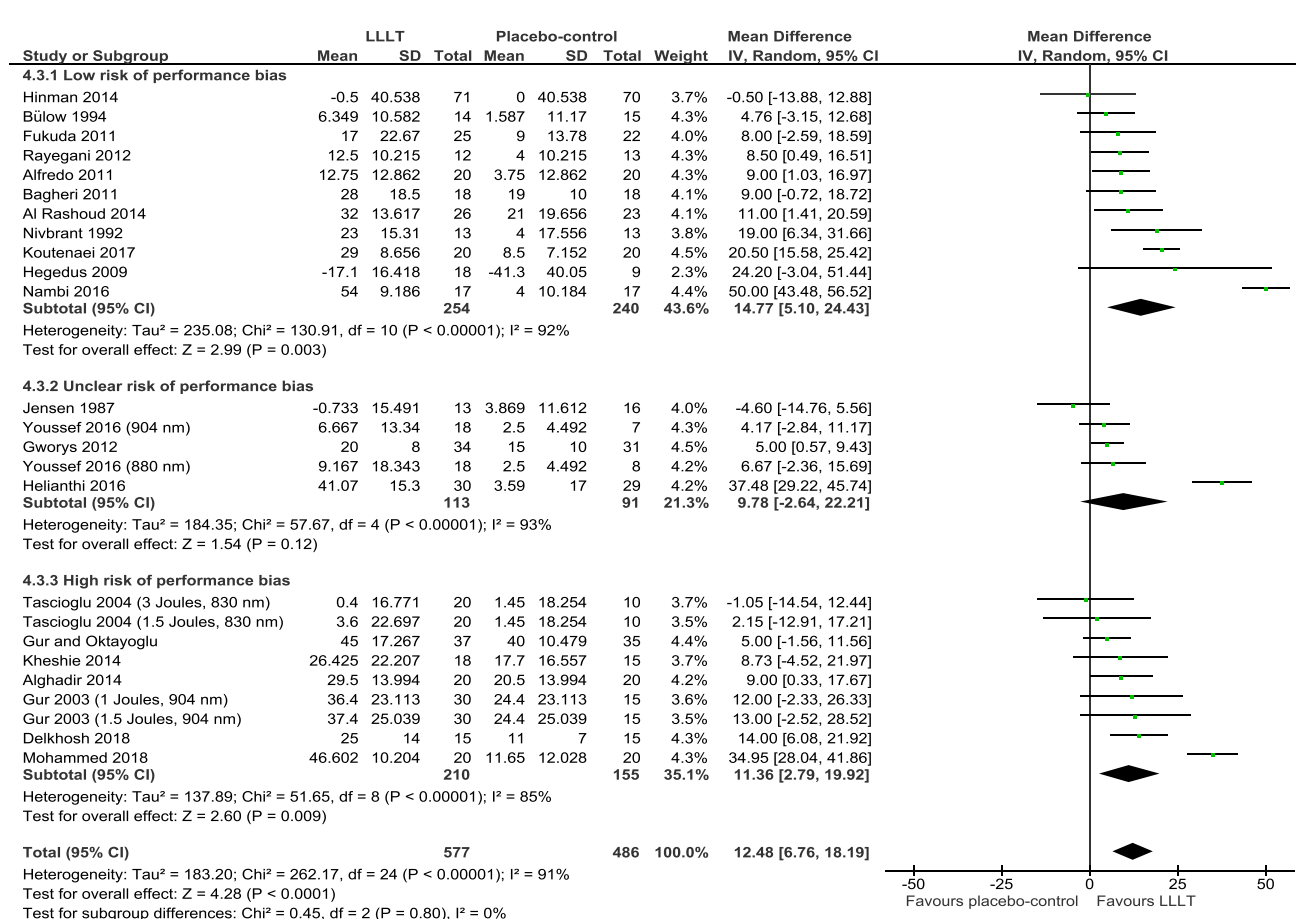

Fig 10 | Pain results - risk of performance bias (blinding of therapist)

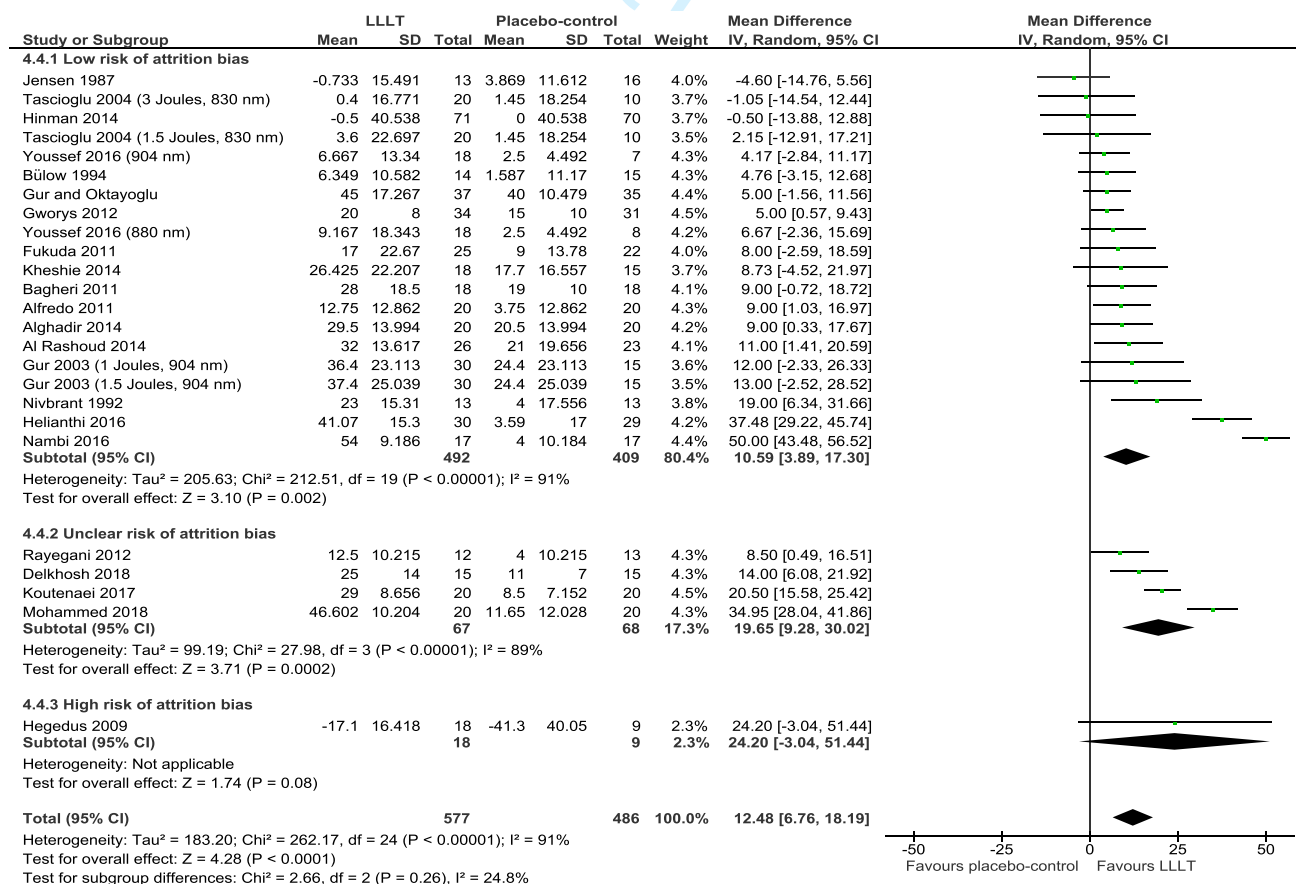

Fig 11 | Pain results - risk of attrition bias (incomplete outcome data)



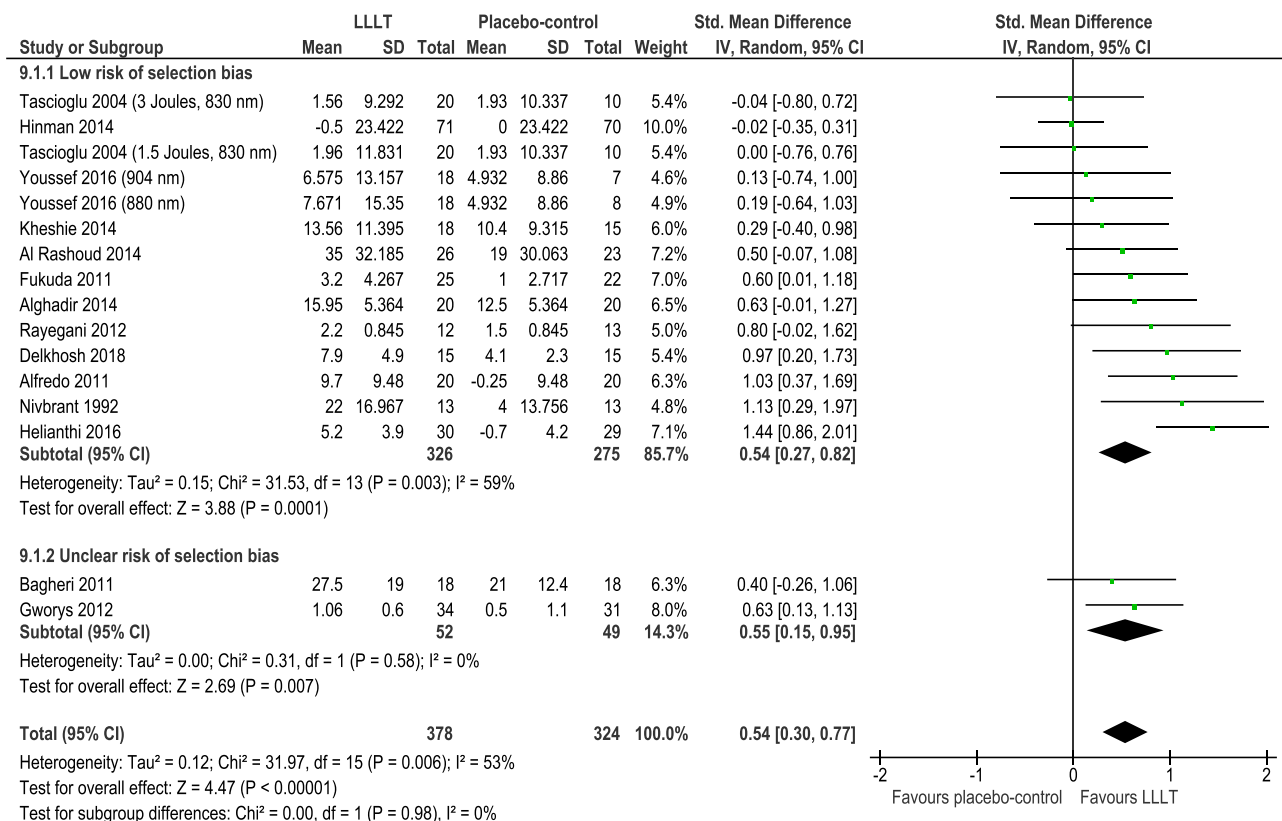

Fig 12 | Disability results - risk of selection bias (random sequence generation)

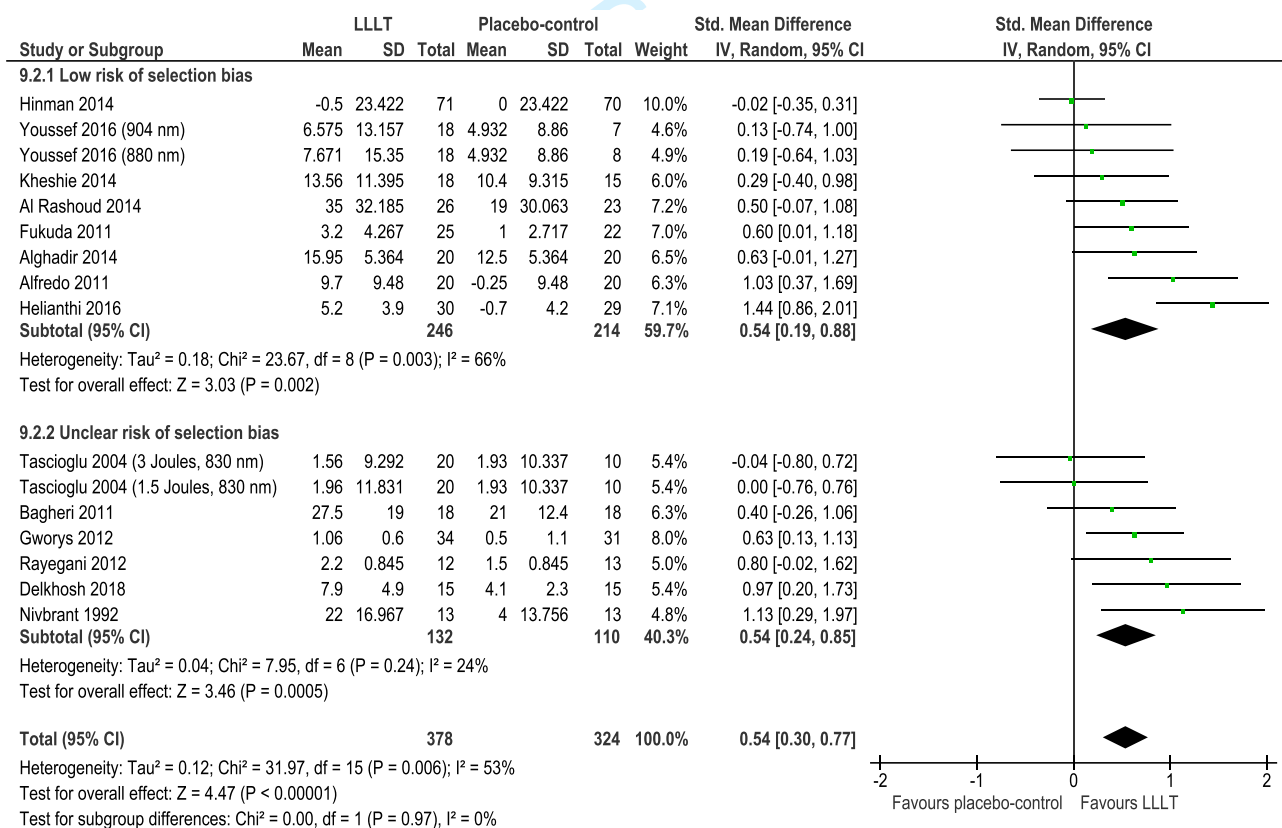

Fig 13 | Disability results - risk of selection bias (allocation concealment)

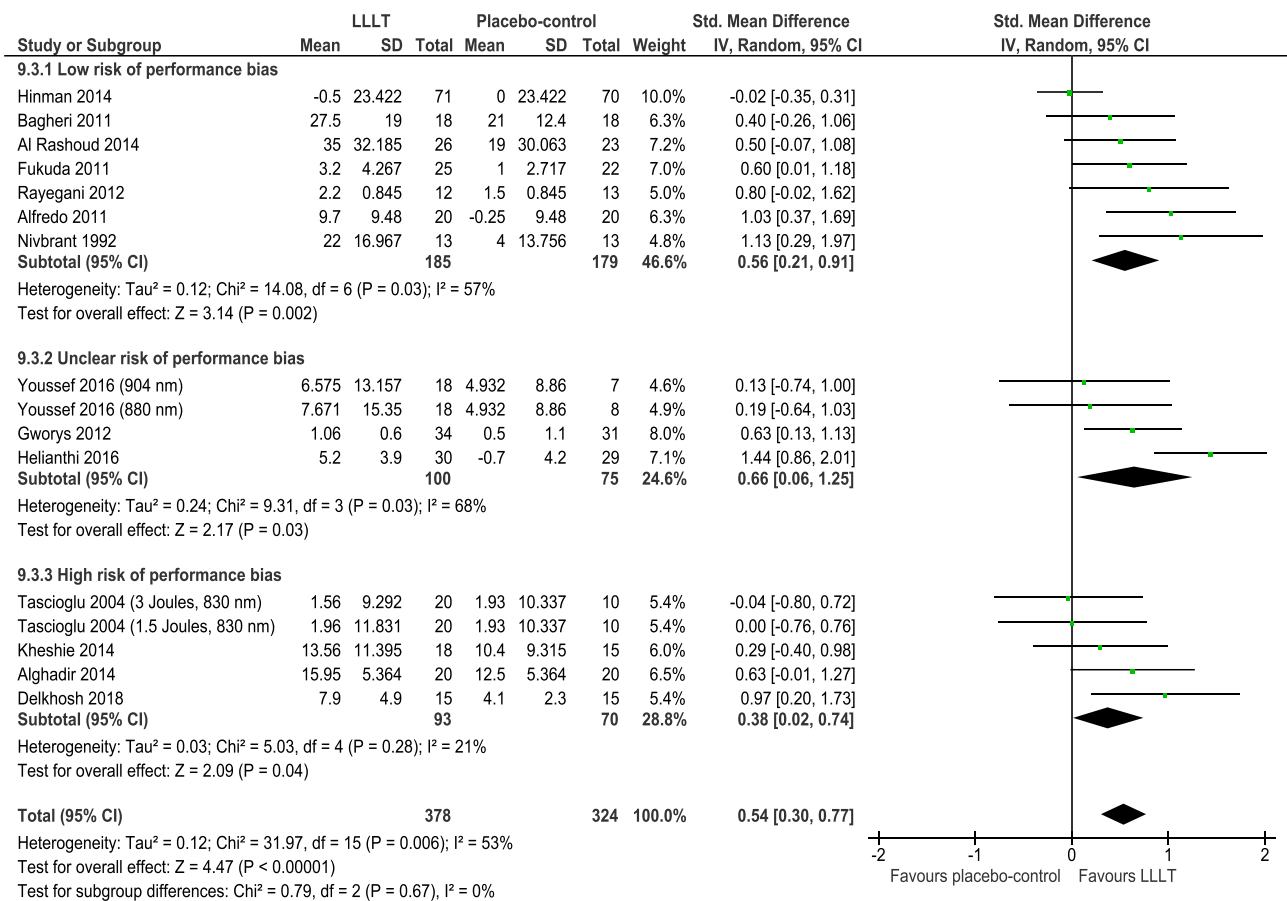

Fig 14 | Disability results - risk of performance bias (blinding of therapist)

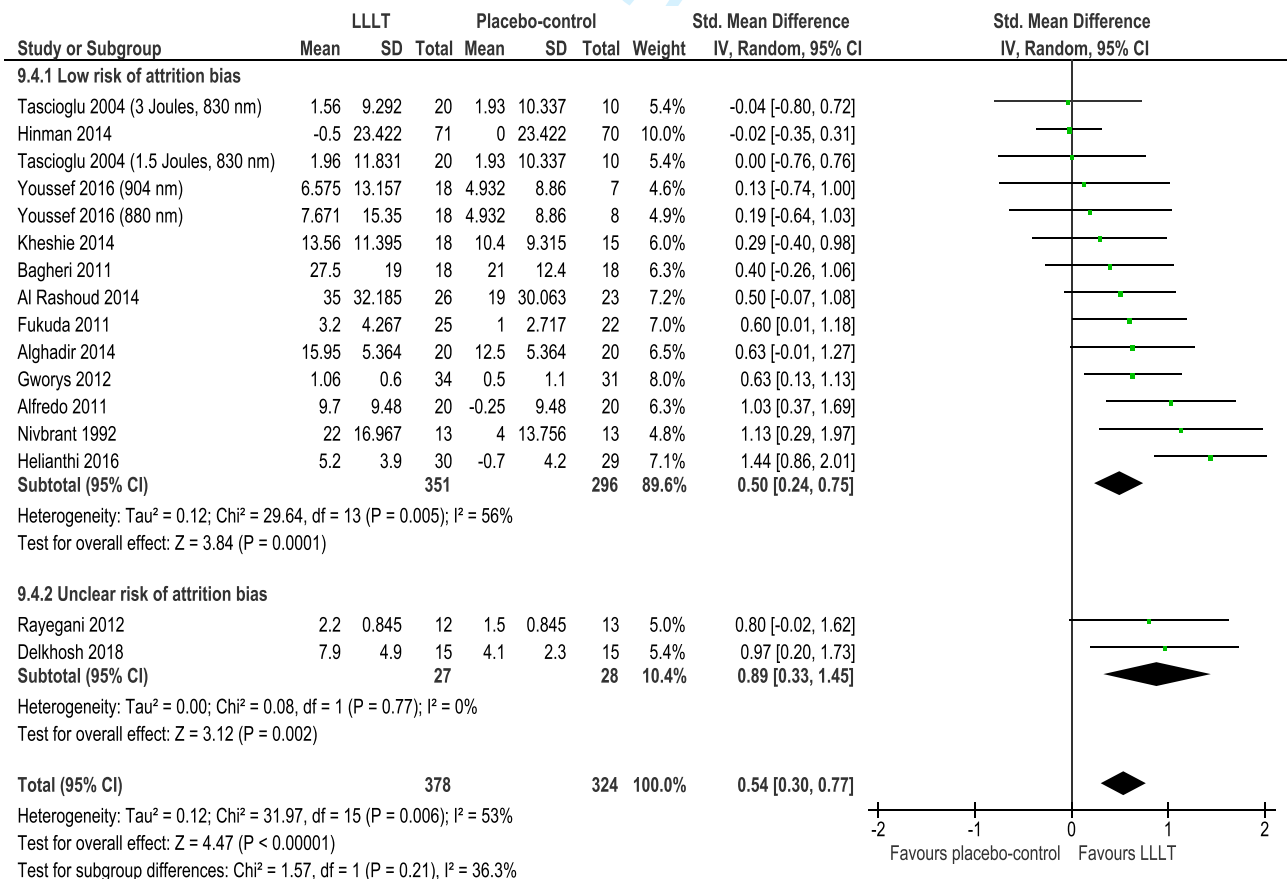

Fig 15 | Disability results - risk of attrition bias (incomplete outcome data)

## Support for risk of bias judgments and funding of the included trials

### Al Rashoud et al. 2014

| Type of bias                           | Judgment | Support for judgment                                                                                                                                                                                                                                                                                    |
|----------------------------------------|----------|---------------------------------------------------------------------------------------------------------------------------------------------------------------------------------------------------------------------------------------------------------------------------------------------------------|
| Random sequence generation             | Low risk | Quote: "... a randomization list was produced using software-generated randomised numbers to the randomisation depended on random blocks of 10."<br>Our comment: Probably done.                                                                                                                         |
| Allocation concealment                 | Low risk | Our comment: Investigators are unable to predict the allocation made by a computer-based randomization program.                                                                                                                                                                                         |
| Blinding of participants and personnel | Low risk | Quote: "Neither investigator nor the patient knew whether a placebo or active treatment was being administered to only the research assistant had the identifying code to determine which treatment was given."<br>Our comment: Probably true. The experimental group was treated with invisible laser. |
| Blinding of assessor                   | Low risk | Our comment: All outcomes of interest are self-reported (participant-assessed) and the participants were probably blinded.                                                                                                                                                                              |
| Incomplete data                        | Low risk | Quote: "Forty-nine patients with knee osteoarthritis were assigned at random into two groups: Active laser group (n = 26) and placebo laser group (n = 23)", "... 49 completed the study ...".<br>Our comment: Probably true.                                                                           |
| Selective reporting                    | Low risk | Our comment: Reported in adherence to a protocol (International Standard Randomised Controlled Trials Number: ISRCTN24010862).                                                                                                                                                                          |

**Funding - quote:** "The project was funded by general administration for medical services of Ministry of Interior, Security Forces Hospital; Riyadh, Saudi Arabia."

### Alfredo et al. 2011

| Type of bias                           | Judgment | Support for judgment                                                                                                                                                                                                                                                                                                                                                     |
|----------------------------------------|----------|--------------------------------------------------------------------------------------------------------------------------------------------------------------------------------------------------------------------------------------------------------------------------------------------------------------------------------------------------------------------------|
| Random sequence generation             | Low risk | Quote: "Randomization was performed by using sealed, randomly filled envelopes describing the treatment group. Patients and the physiotherapist responsible for the evaluation were unaware of randomization results".<br>Our comment: Probably done. It seems unlikely that the investigators could easily predict the group allocation due to the sequence generation. |
| Allocation concealment                 | Low risk | Quote: "Patients and the physiotherapist responsible for the randomization were unaware of the randomization results".<br>Our comment: Probably true.                                                                                                                                                                                                                    |
| Blinding of participants and personnel | Low risk | Quote: "All patients were treated by the same physiotherapist who had not taken part in the evaluations".<br>"The laser equipment had two identical pens, one for the active treatment and one for the placebo treatment (sealed)".<br>Our comment: Probably done. The experimental group was treated with invisible laser.                                              |
| Blinding of assessor                   | Low risk | Quote: "All participants were evaluated by the same blinded physiotherapist"<br>Our comment: All outcomes of interest are self-reported (participant-assessed) and the participants were probably blinded.                                                                                                                                                               |
| Incomplete data                        | Low risk | Our comment: 13% of the included participants were not evaluated. This number is unlikely to introduce a relevant bias.                                                                                                                                                                                                                                                  |
| Selective reporting                    | Low risk | Reported in adherence to a protocol (Clinical Trials number: CT01306435).                                                                                                                                                                                                                                                                                                |

**Funding - quote:** "This study was supported financially by: Fundação de Amparo à Pesquisa do Estado de São Paulo (FAPESP) – Foundation of Research Support of São Paulo State and Coordenação de Aperfeiçoamento de Pessoal de Nível Superior (CAPES) – Coordination for the Improvement of Higher Level – or Education – Personnel. Biostatistics Support Group, Department of Dentistic, School of Odontology, University of São Paulo, São Paulo, Brazil."

### Alghadir et al. 2013

| Type of bias                           | Judgment  | Support for judgment                                                                                                                                                                                                                                                                       |
|----------------------------------------|-----------|--------------------------------------------------------------------------------------------------------------------------------------------------------------------------------------------------------------------------------------------------------------------------------------------|
| Random sequence generation             | Low risk  | Quote: "Randomization was performed using sealed, randomly filled envelopes".<br>Our comment: Probably done.                                                                                                                                                                               |
| Allocation concealment                 | Low risk  | Our comment: It seems unlikely that the investigators could easily predict the group allocation due to the sequence generation.                                                                                                                                                            |
| Blinding of participants and personnel | High risk | Quote: "The treatment parameters were identical, but without switching on the machine".<br>Our comment: Probably done. The study is described as single-blinded. The experimental group was treated with invisible laser. The physiotherapists treating the participants were not blinded. |
| Blinding of assessor                   | Low risk  | Our comment: All outcomes of interest are self-reported (participant-assessed) and the participants were probably blinded.                                                                                                                                                                 |
| Incomplete data                        | Low risk  | Quote: "(...) all of them completed the study period."<br>Our comment: Probably true.                                                                                                                                                                                                      |
| Selective reporting                    | Low risk  | Our comment: Reported as stated in the protocol.                                                                                                                                                                                                                                           |

**Funding - quote:** "The authors extend their appreciation to the Deanship of Scientific Research at King Saud University for funding the work through the research group project NO RGP-VPP-209."

**Bagheri et al. 2010**

| Type of bias                           | Judgment     | Support for judgment                                                                                                                                                                                                                           |
|----------------------------------------|--------------|------------------------------------------------------------------------------------------------------------------------------------------------------------------------------------------------------------------------------------------------|
| Random sequence generation             | Unclear risk | Quote (translated from Farsi): <i>"The random distribution of people was done in such a way that the number of male and female patients is the same in both groups"</i> .<br>Our comment: Not enough information to make a qualified judgment. |
| Allocation concealment                 | Unclear risk | Our comment: Not enough information to make a qualified judgment.                                                                                                                                                                              |
| Blinding of participants and personnel | Low risk     | Quote (translated from Farsi): <i>"The presence of active or inactive lasers was not known"</i> .<br>Our comment: Probably true. The experimental group was treated with invisible laser.                                                      |
| Blinding of assessor                   | Low risk     | Our comment: All outcomes of interest are self-reported (participant-assessed) and the participants were probably blinded. The experimental group was treated with invisible laser.                                                            |
| Incomplete data                        | Low risk     | Our comment: 10% of the participants were not evaluated. This number is unlikely to introduce a relevant bias.                                                                                                                                 |
| Selective reporting                    | Low risk     | Our comment: No outcome of interest described in the method section is missing from the result section.                                                                                                                                        |

**Funding** - Sponsored by the Semnan University of Science.

**Bülow et al. 1994**

| Type of bias                           | Judgment     | Support for judgment                                                                                                                                                                                                                                                                         |
|----------------------------------------|--------------|----------------------------------------------------------------------------------------------------------------------------------------------------------------------------------------------------------------------------------------------------------------------------------------------|
| Random sequence generation             | Unclear risk | Our comment: The authors state that the study is randomized, but there is no description of the randomization method.                                                                                                                                                                        |
| Allocation concealment                 | Unclear risk | Our comment: Not enough information to make a qualified judgment.                                                                                                                                                                                                                            |
| Blinding of participants and personnel | Low risk     | Quote: <i>"The nurse in charge of the randomization key selected the laser or placebo-laser before each treatment"</i> and <i>"The blinded settings for patient and physician were maintained"</i> .<br>Our comment: Probably done. The experimental group was treated with invisible laser. |
| Blinding of assessor                   | Low risk     | Our comment: All outcomes of interest are self-reported (participant-assessed) and the participants were probably blinded.                                                                                                                                                                   |
| Incomplete data                        | Low risk     | Our comment: No dropouts.                                                                                                                                                                                                                                                                    |
| Selective reporting                    | Low risk     | Our comment: No outcomes of interest described in the method section is missing in the result section.                                                                                                                                                                                       |

**Funding - quote:** *"The study was sponsored by Henny and Helge Holgersen's Foundation and the Bodil Petersen Foundation."*

**Delkhosh et al. 2018**

| Type of bias                           | Judgment     | Support for judgment                                                                                                                                                                                                                                                                                                                                                                                                 |
|----------------------------------------|--------------|----------------------------------------------------------------------------------------------------------------------------------------------------------------------------------------------------------------------------------------------------------------------------------------------------------------------------------------------------------------------------------------------------------------------|
| Random sequence generation             | Low risk     | Quote: <i>"... volunteers are randomly allocated to three groups by lottery."</i> .<br>Our comment: Probably done.                                                                                                                                                                                                                                                                                                   |
| Allocation concealment                 | Unclear risk | Our comment: Not enough information to make a qualified judgment.                                                                                                                                                                                                                                                                                                                                                    |
| Blinding of participants and personnel | High risk    | Quotes: <i>"The patients were randomly assigned to three groups: 1-standard treatment with placebo laser..."</i> and <i>"Not blinded"</i> .<br>Our comment: The investigators claimed the trial was placebo-controlled which is probably true as the participants were treated with invisible laser. Therefore, it seems likely that the investigators statement regarding lack of blinding refers to the therapist. |
| Blinding of assessor                   | Low risk     | Our comment: All outcomes of interest are self-reported (participant-assessed) and the participants were probably blinded.                                                                                                                                                                                                                                                                                           |
| Incomplete data                        | Unclear risk | Our comment: Not enough information to make a qualified judgment.                                                                                                                                                                                                                                                                                                                                                    |
| Selective reporting                    | Low risk     | Our comment: Reported in adherence to a protocol (Iranian Registry of Clinical Trials number: IRCT201502224549N8).                                                                                                                                                                                                                                                                                                   |

**Funding - quote:** *"Vice chancellor for research, Semnan University of Medical Sciences."*

**Fukuda et al. 2011**

| Type of bias                           | Judgment | Support for judgment                                                                                                                                                                                                                                                                                                                    |
|----------------------------------------|----------|-----------------------------------------------------------------------------------------------------------------------------------------------------------------------------------------------------------------------------------------------------------------------------------------------------------------------------------------|
| Random sequence generation             | Low risk | Quote: <i>"This distribution was made by a secretary who was not involved in the treatment or evaluation, through a draw of sealed opaque envelopes. The envelopes were taken directly to the therapist without the patient having access to the result."</i><br>Our comment: Probably done.                                            |
| Allocation concealment                 | Low risk | Our comment: It seems unlikely that the investigators could easily predict the group allocation due to the sequence generation.                                                                                                                                                                                                         |
| Blinding of participants and personnel | Low risk | Quote: <i>"(...) two identical pens, of which one was active (laser) and the other was sealed (placebo). These were labelled A and B by the project secretary, and only this person knew the true identification of the pens."</i><br>Our comment to the quote: Probably done. The experimental group was treated with invisible laser. |
| Blinding of assessor                   | Low risk | Our comment: All outcomes of interest are self-reported (participant-assessed) and the participants were probably blinded.                                                                                                                                                                                                              |
| Incomplete data                        | Low risk | Our comment: No dropouts.                                                                                                                                                                                                                                                                                                               |
| Selective reporting                    | Low risk | Our comment: No outcome of interest described in the method section is missing from the result section.                                                                                                                                                                                                                                 |

**Funding:** Physical Therapy Sector, Irmandade da Santa Casa de Misericórdia de São Paulo (ISCMSP), São Paulo, São Paulo, Brazil.

**Gur & Oktayoglu**

| Type of bias                           | Judgment     | Support for judgment                                                                                                                                                                                                                                                                                                                                                                                             |
|----------------------------------------|--------------|------------------------------------------------------------------------------------------------------------------------------------------------------------------------------------------------------------------------------------------------------------------------------------------------------------------------------------------------------------------------------------------------------------------|
| Random sequence generation             | Low risk     | Quote: <i>"Patients were randomly assigned to three treatment groups by one of the non-treating authors by drawing 1 of 120 envelopes."</i><br>Our comment: Probably done.                                                                                                                                                                                                                                       |
| Allocation concealment                 | Unclear risk | Our comment: It is unclear whether envelopes were sequentially numbered, opaque, and sealed.                                                                                                                                                                                                                                                                                                                     |
| Blinding of participants and personnel | High risk    | Quote: <i>"The study was conducted in a double-blind fashion. Subjects and physician were unaware of the code for active or placebo laser until the data analysis was completed but therapist was aware of the code for active or placebo laser."</i><br>Our comment: Probably true. The experimental group was treated with invisible laser. The participants were probably blinded, but the therapist was not. |
| Blinding of assessor                   | Low risk     | Our comment: All outcomes of interest are self-reported (participant-assessed) and the participants were probably blinded.                                                                                                                                                                                                                                                                                       |
| Incomplete data                        | Low risk     | Our comment: 7.5% of the participants allocated to the laser group were not evaluated. 12.5% of the participants allocated to the control group were not evaluated. These numbers are unlikely to introduce a relevant bias. Reasons for dropout across groups are similar.                                                                                                                                      |
| Selective reporting                    | Low risk     | Our comment: No outcome of interest described in the method section is missing from the result section.                                                                                                                                                                                                                                                                                                          |

**Funding:** Not stated.

**Gur et al. 2003**

| Type of bias                           | Judgment     | Support for judgment                                                                                                                                                                                                                                                                                                                                                                                             |
|----------------------------------------|--------------|------------------------------------------------------------------------------------------------------------------------------------------------------------------------------------------------------------------------------------------------------------------------------------------------------------------------------------------------------------------------------------------------------------------|
| Random sequence generation             | Low risk     | Quote: <i>"Patients were randomly assigned to three treatment groups by one of the non-treating authors by drawing of 1 of 90 envelopes"</i><br>Our comment: Probably done.                                                                                                                                                                                                                                      |
| Allocation concealment                 | Unclear risk | Our comment: It is unclear whether envelopes were sequentially numbered, opaque, and sealed.                                                                                                                                                                                                                                                                                                                     |
| Blinding of participants and personnel | High risk    | Quote: <i>"The study was conducted in a double-blind fashion. Subjects and physician were unaware of the code for active or placebo laser until the data analysis was completed but therapist was aware of the code for active or placebo laser."</i><br>Our comment: Probably true. The experimental group was treated with invisible laser. The participants were probably blinded, but the therapist was not. |
| Blinding of assessor                   | Low risk     | Our comment: All outcomes of interest are self-reported (participant-assessed) and the participants were probably blinded.                                                                                                                                                                                                                                                                                       |
| Incomplete data                        | Low risk     | Our comment: No dropouts.                                                                                                                                                                                                                                                                                                                                                                                        |
| Selective reporting                    | Low risk     | Our comment: No outcome of interest described in the method section is missing from the result section.                                                                                                                                                                                                                                                                                                          |

**Funding:** Not stated.

**Gworys et al. 2012**

| Type of bias                           | Judgment     | Support for judgment                                                                                                                                                                                                                                                                                                     |
|----------------------------------------|--------------|--------------------------------------------------------------------------------------------------------------------------------------------------------------------------------------------------------------------------------------------------------------------------------------------------------------------------|
| Random sequence generation             | Unclear risk | Our comment: The authors state that the study is randomized, but there is no description of the randomization method.                                                                                                                                                                                                    |
| Allocation concealment                 | Unclear risk | Our comment: Not enough information to make a qualified judgment.                                                                                                                                                                                                                                                        |
| Blinding of participants and personnel | Unclear risk | Quote: "(...) a placebo group where laser therapy procedures were simulated without actual irradiation.". Our comment: Probably done. The experimental group was treated with invisible laser. The participants were probably blinded, but there is too little information to judge whether the therapists were blinded. |
| Blinding of assessor                   | Low risk     | Our comment: All outcomes of interest are self-reported (participant-assessed) and the participants were probably blinded.                                                                                                                                                                                               |
| Incomplete data                        | Low risk     | Quote: "laser the therapy sessions were performed once a day, 5 days a week over 2 weeks. Each patient attended 10 sessions.". Our comment: All participants probably attended to all 10 sessions. The outcomes were assessed immediately after the 10 sessions. Thus, there were probably no dropouts.                  |
| Selective reporting                    | Low risk     | Our comment: No outcome of interest described in the method section is missing from the result section.                                                                                                                                                                                                                  |

**Funding:** Not stated.

**Hegedus et al. 2009**

| Type of bias                           | Judgment  | Support for judgment                                                                                                                                                                                                                       |
|----------------------------------------|-----------|--------------------------------------------------------------------------------------------------------------------------------------------------------------------------------------------------------------------------------------------|
| Random sequence generation             | Low risk  | Quote: "Randomization was ensured by having patients randomly choose sealed envelopes from a bowl". Our comment: Probably done.                                                                                                            |
| Allocation concealment                 | Low risk  | Our comment: It seems unlikely that the investigators could easily predict the group allocation due to the sequence generation.                                                                                                            |
| Blinding of participants and personnel | Low risk  | Quote: "Neither the patients nor the operator knew which was the active or placebo LLLT probe.". Our comment: Probably true. The experimental group was treated with invisible laser.                                                      |
| Blinding of assessor                   | Low risk  | Quote: "Neither the patients nor the operator knew which was the active or placebo LLLT probe.". Our comment: Probably true. All outcomes of interest are self-reported (participant-assessed) and the participants were probably blinded. |
| Incomplete data                        | High risk | Our comment: 50% of the participants in the control group were not evaluated while 100% of the participants in the laser group were evaluated. These numbers are likely to introduce a relevant bias.                                      |
| Selective reporting                    | Low risk  | Our comment: No outcome of interest described in the method section is missing from the result section.                                                                                                                                    |

**Funding - quote:** "The authors wish to thank Dr. Gábor Deák for the Doppler examinations and András Tóth for taking the numerous thermographic images."

**Helianti et al. 2016**

| Type of bias                           | Judgment     | Support for judgment                                                                                                                                                                                                                                                                                                                                                                                                                                                                                                                                                                              |
|----------------------------------------|--------------|---------------------------------------------------------------------------------------------------------------------------------------------------------------------------------------------------------------------------------------------------------------------------------------------------------------------------------------------------------------------------------------------------------------------------------------------------------------------------------------------------------------------------------------------------------------------------------------------------|
| Random sequence generation             | Low risk     | Quote: "a randomization list was created using a computer-generated table containing random numbers.". Our comment: Probably done.                                                                                                                                                                                                                                                                                                                                                                                                                                                                |
| Allocation concealment                 | Low risk     | Our comment: Investigators are unable to predict the allocation made by a computer-based randomization program.                                                                                                                                                                                                                                                                                                                                                                                                                                                                                   |
| Blinding of participants and personnel | Unclear risk | Quote: "Both investigator and participants did not know whether laser acupuncture active treatment or placebo treatment was being administered. Only the researcher and her assistant had the code to determine which treatment was given. Both groups used the same laser device and the same study site. Participant blinding was optimized by using eye mask and headset (...)". Our comment: The experimental group was treated with invisible laser. The investigator and participants were probably blinded, but it is unclear who administered the therapy and if this person was blinded. |
| Blinding of assessor                   | Low risk     | Our comment: All outcomes of interest are self-reported (participant-assessed) and the participants were probably blinded.                                                                                                                                                                                                                                                                                                                                                                                                                                                                        |
| Incomplete data                        | Low risk     | Our comment: 4.8% of the participants were not evaluated. This number is unlikely to introduce a relevant bias.                                                                                                                                                                                                                                                                                                                                                                                                                                                                                   |
| Selective reporting                    | Low risk     | Our comment: No outcome of interest described in the method section is missing from the result section.                                                                                                                                                                                                                                                                                                                                                                                                                                                                                           |

**Funding sources:** Not stated.



**Hinman et al. 2014**

| Type of bias                           | Judgment | Support for judgment                                                                                                                                                                                                                                       |
|----------------------------------------|----------|------------------------------------------------------------------------------------------------------------------------------------------------------------------------------------------------------------------------------------------------------------|
| Random sequence generation             | Low risk | Quote: "An investigator (K.N.) accessed the computerized randomization to reveal allocation."<br>Our comment: Probably done.                                                                                                                               |
| Allocation concealment                 | Low risk | Our comment: It seems unlikely that the investigators could predict the group allocation due to the sequence generation.                                                                                                                                   |
| Blinding of participants and personnel | Low risk | Quote: "Participant codes for randomized laser treatment groups were pre-programmed into the laser machines by an independent biomechanical engineer to permit blinding of acupuncturist and participants in these groups."<br>Our comment: Probably true. |
| Blinding of assessor                   | Low risk | Our comment: All outcomes of interest are self-reported (participant-assessed) and the participants were probably blinded.                                                                                                                                 |
| Incomplete data                        | Low risk | Our comment: 8.45% and 17.14% had dropped out from the experimental and placebo group at week 12, respectively. Intention to treat analysis was used and this analysis and the results did not differ from the per-protocol analysis.                      |
| Selective reporting                    | Low risk | Our comment: Reported in adherence to a protocol (Australian New Zealand Clinical Trials Registry Number: ACTRN12609001001280).                                                                                                                            |

**Funding - quote:** "Funding/Support: This trial was funded by the National Health and Medical Research Council (project 566783). Drs Hinman and Bennell are both funded in part by Australian Research Council Future Fellowships (FT130100175 and FT0991413, respectively). Dr McCrory is funded in part by a National Health and Medical Research Council Practitioner Fellowship (1026383). Dr Pirotta is funded in part by a National Health and Medical Research Council Career Development Fellowship (1050830). Dr Williamson was funded in part by a National Health and Medical Research Council grant (1004233). Role of the Funder/Sponsor: The study sponsor had no role in the design and conduct of the study; collection, management, analysis, and interpretation of the data; preparation, review, or approval of the manuscript; and decision to submit the manuscript for publication."

**Jensen et al. 1987**

| Type of bias                           | Judgment     | Support for judgment                                                                                                                                                                                                                                                                                                                                                                 |
|----------------------------------------|--------------|--------------------------------------------------------------------------------------------------------------------------------------------------------------------------------------------------------------------------------------------------------------------------------------------------------------------------------------------------------------------------------------|
| Random sequence generation             | Unclear risk | Our comment: The authors state that the study is randomized but there is no description of the randomization method.                                                                                                                                                                                                                                                                 |
| Allocation concealment                 | Unclear risk | Our comment: Not enough information to make a qualified judgment.                                                                                                                                                                                                                                                                                                                    |
| Blinding of participants and personnel | Unclear risk | Quote: (Translated from Danish) "Two coded laser devices of the same appearance was utilized in the trial. One of the devices was inactive and served as control. The other was active with infrared laser."<br>Our comment: The experimental group was treated with invisible laser. The participants were probably blinded, but it is unknown whether the therapists were blinded. |
| Blinding of assessor                   | Low risk     | Our comment: All outcomes of interest are assessed and reported by the participants. The experimental group was treated with invisible laser.                                                                                                                                                                                                                                        |
| Incomplete data                        | Low risk     | Our comment: 1 participant was not evaluated.                                                                                                                                                                                                                                                                                                                                        |
| Selective reporting                    | Low risk     | Our comment: No outcome of interest described in the method section is missing from the result section.                                                                                                                                                                                                                                                                              |

**Funding:** Not stated.

**Kheshie et al. 2014**

| Type of bias                           | Judgment  | Support for judgment                                                                                                                                                                                               |
|----------------------------------------|-----------|--------------------------------------------------------------------------------------------------------------------------------------------------------------------------------------------------------------------|
| Random sequence generation             | Low risk  | Quote: "Randomization was performed simply by assigning a specific identification number for each patient. These numbers were randomized into three groups using the SPSS program".<br>Our comment: Probably done. |
| Allocation concealment                 | Low risk  | Our comment: Investigators are unable to predict the allocation made by a computer-based randomization program.                                                                                                    |
| Blinding of participants and personnel | High risk | Our comment: The study is described as single-blinded and the participants were probably blinded. Thus, the therapist was not blinded.                                                                             |
| Blinding of assessor                   | Low risk  | Our comment: All outcomes of interest are self-reported (participant-assessed) and the participants were probably blinded.                                                                                         |
| Incomplete data                        | Low risk  | Our comment: 15% and 0% dropped out of the placebo and experimental group, respectively. These numbers are unlikely to introduce a relevant bias.                                                                  |
| Selective reporting                    | Low risk  | Our comment: No outcome of interest described in the method section is missing from the result section.                                                                                                            |

**Funding - quote:** "This research received a grant from the Institute of Scientific Research and Revival of Islamic Heritage at Umm Al-Qura University, Makkah, Saudi Arabia."

**Koutenaai et al. 2017**

| Type of bias                           | Judgment     | Support for judgment                                                                                                                                                                                                                                                                   |
|----------------------------------------|--------------|----------------------------------------------------------------------------------------------------------------------------------------------------------------------------------------------------------------------------------------------------------------------------------------|
| Random sequence generation             | Low risk     | Quote: "...were assigned randomly (using random blocks) ...".<br>Our comment: Probably done.                                                                                                                                                                                           |
| Allocation concealment                 | Low risk     | Our comment: The use of random blocks was probably sufficient.                                                                                                                                                                                                                         |
| Blinding of participants and personnel | Low risk     | Quote: "The placebo group also lasted for 70 seconds in these places, but the laser had no output".<br>Our comment: Both participants and therapists were probably blinded because they described the study as double-blinded and treated the intervention group with invisible laser. |
| Blinding of assessor                   | Low risk     | Our comment: All outcomes of interest are self-reported (participant-assessed) and the participants were probably blinded.                                                                                                                                                             |
| Incomplete data                        | Unclear risk | Our comment: Not enough information to make a qualified judgment.                                                                                                                                                                                                                      |
| Selective reporting                    | Low risk     | Our comment: No outcome of interest described in the method section is missing from the result section.                                                                                                                                                                                |

**Funding - quote:** "The study was supported by the Department of Physiotherapy at the University of Social Welfare and Rehabilitation Sciences."

**Mohammed et al. 2017**

| Type of bias                           | Judgment     | Support for judgment                                                                                                                                                                                                                                                                                                                                                                                 |
|----------------------------------------|--------------|------------------------------------------------------------------------------------------------------------------------------------------------------------------------------------------------------------------------------------------------------------------------------------------------------------------------------------------------------------------------------------------------------|
| Random sequence generation             | Unclear risk | Our comment: The authors state that the study is randomized but there is no description of the randomization method.                                                                                                                                                                                                                                                                                 |
| Allocation concealment                 | Unclear risk | Our comment: Not enough information to make a qualified judgment.                                                                                                                                                                                                                                                                                                                                    |
| Blinding of participants and personnel | High risk    | Quote: "(...) placebo laser (laser probe is directed to the same acupoints while the device is off)".<br>Our comment: Probably done. The experimental group was treated with invisible laser. The study is described as single-blinded and the participants were probably blinded. As there was no description of a blinding procedure of the therapist, we assume that this person was not blinded. |
| Blinding of assessor                   | Low risk     | Our comment: All outcomes of interest are self-reported (participant-assessed) and the participants were probably blinded.                                                                                                                                                                                                                                                                           |
| Incomplete data                        | Unclear risk | Our comment: Not enough information to make a qualified judgment.                                                                                                                                                                                                                                                                                                                                    |
| Selective reporting                    | Low risk     | Our comment: No outcome of interest described in the method section is missing from the result section.                                                                                                                                                                                                                                                                                              |

**Funding - quote:** Not stated. The authors state: "The funding organization(s) played no role in the study design; in the collection, analysis, and interpretation of data; in the writing of the report; or in the decision to submit the report for publication."

**Nambi et al. 2016**

| Type of bias                           | Judgment | Support for judgment                                                                                                                                                                                                                                                                                                                             |
|----------------------------------------|----------|--------------------------------------------------------------------------------------------------------------------------------------------------------------------------------------------------------------------------------------------------------------------------------------------------------------------------------------------------|
| Random sequence generation             | Low risk | Quote: "Thirty-four subjects were randomized into two groups (active and placebo) by an investigator who is not involved in assessment, diagnosis or treatment. Randomization was performed by using sealed randomly filled envelopes from a bowl containing an equal number of slips with either number 1 or 2".<br>Our comment: Probably done. |
| Allocation concealment                 | Low risk | Our comment: It seems unlikely that the investigators could predict the group allocation due to the sequence generation.                                                                                                                                                                                                                         |
| Blinding of participants and personnel | Low risk | Quote: "Subjects and the physiotherapist responsible for the evaluation were unaware of randomization results". "super pulsed laser with (...) or with a placebo probe (...) of the same appearance and display".<br>Our comment: Probably true. The experimental group was treated with invisible laser.                                        |
| Blinding of assessor                   | Low risk | Quote: "All subjects were evaluated by the same blinded physiotherapist".<br>Our comment: Probably done. All outcomes of interest are assessed and reported by the participants who were probably blinded.                                                                                                                                       |
| Incomplete data                        | Low risk | Quote: "The required sample for the study was 17 subjects per group". "All 34 subjects completed the study with the 8-week follow-up evaluation".<br>Our comment: Probably true.                                                                                                                                                                 |
| Selective reporting                    | Low risk | Our comment: No outcomes of interest described in the method section was missing in the result section.                                                                                                                                                                                                                                          |

**Funding - quote:** "Authors are grateful to the Deanship of scientific Research, Prince Sattam Bin Abdul Aziz University, Al-Kharj, Saudi Arabia for the financial support to carry out this project no 2015/01/4375. Research funding program: Specialized Research Grant program (Health)".



**Nivbrant et al. 1992**

| Type of bias                           | Judgment     | Support for judgment                                                                                                                                                                                                                                                                                                                                               |
|----------------------------------------|--------------|--------------------------------------------------------------------------------------------------------------------------------------------------------------------------------------------------------------------------------------------------------------------------------------------------------------------------------------------------------------------|
| Random sequence generation             | Low risk     | Our comment: Randomization was performed by drawing of randomly filled envelopes describing the treatment group.                                                                                                                                                                                                                                                   |
| Allocation concealment                 | Unclear risk | Our comment: It is unclear whether envelopes were sequentially numbered, opaque and sealed.                                                                                                                                                                                                                                                                        |
| Blinding of participants and personnel | Low risk     | Quote (translated from Swedish): <i>"The placebo emitter was visually identical to the active laser. A practitioner otherwise not involved in the trial treated the participants with laser. The practitioner was unaware of which was the active and inactive laser."</i><br>Our comment: Probably done. The experimental group was treated with invisible laser. |
| Blinding of assessor (detection bias)  | Low risk     | Our comment: All outcomes of interest are self-reported (participant-assessed) and the participants were probably blinded.                                                                                                                                                                                                                                         |
| Incomplete data                        | Low risk     | Our comment: 13% in each group were not evaluated. This number is unlikely to introduce a relevant bias.                                                                                                                                                                                                                                                           |
| Selective reporting                    | Low risk     | Our comment: No outcome of interest described in the method section is missing from the result section.                                                                                                                                                                                                                                                            |

**Funding:** Not stated.

**Rayegani et al. 2012**

| Type of bias                           | Judgment     | Support for judgment                                                                                                                                                                                                                                                                                   |
|----------------------------------------|--------------|--------------------------------------------------------------------------------------------------------------------------------------------------------------------------------------------------------------------------------------------------------------------------------------------------------|
| Random sequence generation             | Low risk     | Randomization was ensured by having patients randomly choose sealed envelopes from a bowl.                                                                                                                                                                                                             |
| Allocation concealment                 | Unclear risk | Our comment: It is unclear whether the envelopes were opaque.                                                                                                                                                                                                                                          |
| Blinding of participants and personnel | Low risk     | Quote: <i>"Neither the patients nor the operator knew which was the active or placebo LLLT probe."</i> <i>"The placebo group was treated with an ineffective probe (power 0 mW) and with the same method."</i><br>Our comment: Probably done. The experimental group was treated with invisible laser. |
| Blinding of assessor                   | Low risk     | Our comment: All outcomes of interest are self-reported (participant-assessed) and the participants were probably blinded.                                                                                                                                                                             |
| Incomplete data                        | Unclear risk | Our comment: Not enough information to make a qualified judgment.                                                                                                                                                                                                                                      |
| Selective reporting                    | Low risk     | Our comment: No outcome of interest described in the method section is missing from the result section.                                                                                                                                                                                                |

**Funding:** Not stated.

**Tascioglu et al. 2004**

| Type of bias                           | Judgment     | Support for judgment                                                                                                                                                                                    |
|----------------------------------------|--------------|---------------------------------------------------------------------------------------------------------------------------------------------------------------------------------------------------------|
| Random sequence generation             | Low risk     | Quote: <i>"Sixty patients, who fulfilled the entry criteria, were admitted to the study and they were randomly divided into three groups using numbered envelopes"</i> .<br>Our comment: Probably done. |
| Allocation concealment                 | Unclear risk | Our comment: It is unclear whether the envelopes were sealed and opaque.                                                                                                                                |
| Blinding of participants and personnel | High risk    | Our comment: The study is described as single-blinded and the participants were probably blinded. Thus, the therapist was probably not blinded.                                                         |
| Blinding of assessor                   | Low risk     | Our comment: All outcomes of interest are assessed and reported by the participants who were probably blinded.                                                                                          |
| Incomplete data                        | Low risk     | Our comment: No dropouts.                                                                                                                                                                               |
| Selective reporting                    | Low risk     | Our comment: No outcome of interest described in the method section is missing from the result section.                                                                                                 |

**Funding:** Not stated.

Youssef et al. 2016

| Type of bias                           | Judgment     | Support for judgment                                                                                                                                                                                                                                                                                                                                                                                             |
|----------------------------------------|--------------|------------------------------------------------------------------------------------------------------------------------------------------------------------------------------------------------------------------------------------------------------------------------------------------------------------------------------------------------------------------------------------------------------------------|
| Random sequence generation             | Low risk     | Quote: "They were assigned randomly to three groups by a blinded and independent research assistant who opened sealed envelopes that contained a computer-generated randomization card according to the recruitment diagram."<br>Our comment: Probably done.                                                                                                                                                     |
| Allocation concealment                 | Low risk     | Our comment: Not enough information to make a qualified judgment.                                                                                                                                                                                                                                                                                                                                                |
| Blinding of participants and personnel | Unclear risk | Quote: "[...] in the placebo group, procedure was identical but without emission of energy. The laser equipment had two identical pens, one for the active treatment and one for the placebo treatment (sealed)."<br>Our comment: Probably done. The experimental group was treated with invisible laser. The participants were probably blinded, but there was no information regarding blinding of therapists. |
| Blinding of assessor                   | Low risk     | Our comment: All outcomes of interest are self-reported (participant-assessed) and the participants were probably blinded.                                                                                                                                                                                                                                                                                       |
| Incomplete data                        | Low risk     | 1 participant was not evaluated.                                                                                                                                                                                                                                                                                                                                                                                 |
| Selective reporting                    | Low risk     | Our comment: No outcome of interest described in the method section is missing from the result section.                                                                                                                                                                                                                                                                                                          |

Funding: Not stated.

LLLT with and without exercise therapy

Subgroup analyses were performed to assess the impact of exercise therapy on the effect of LLLT in a treatment package (results are from immediately after the end of therapy, primarily). LLLT was significantly superior to the placebo-control both with and without exercise therapy (fig 16-17). The levels of statistical heterogeneity were unaltered in the pain analyses (fig 16), and slightly lowered in the disability analysis (fig 17).

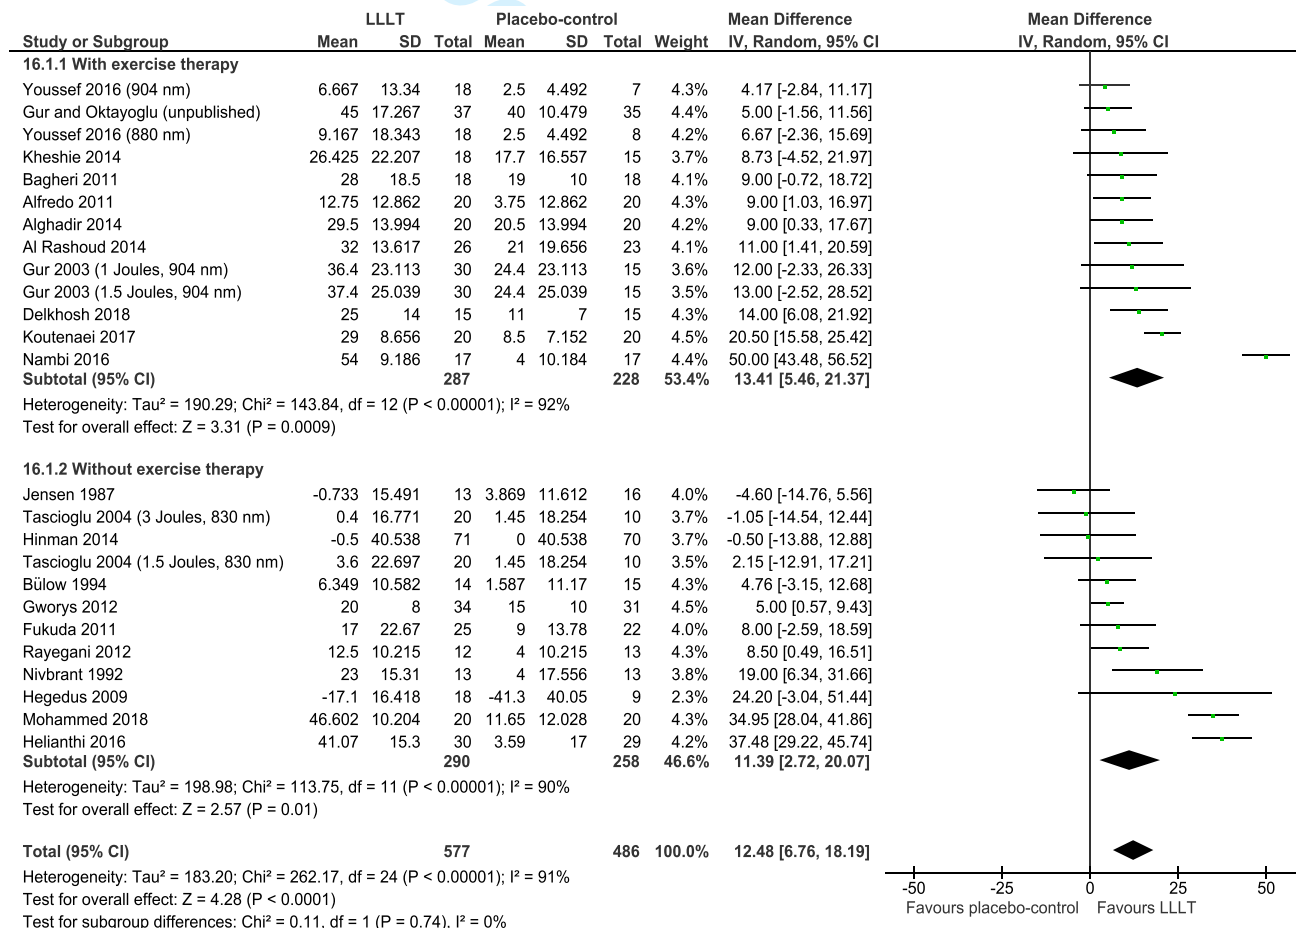

Fig 16 | LLLT with and without exercise therapy (pain)

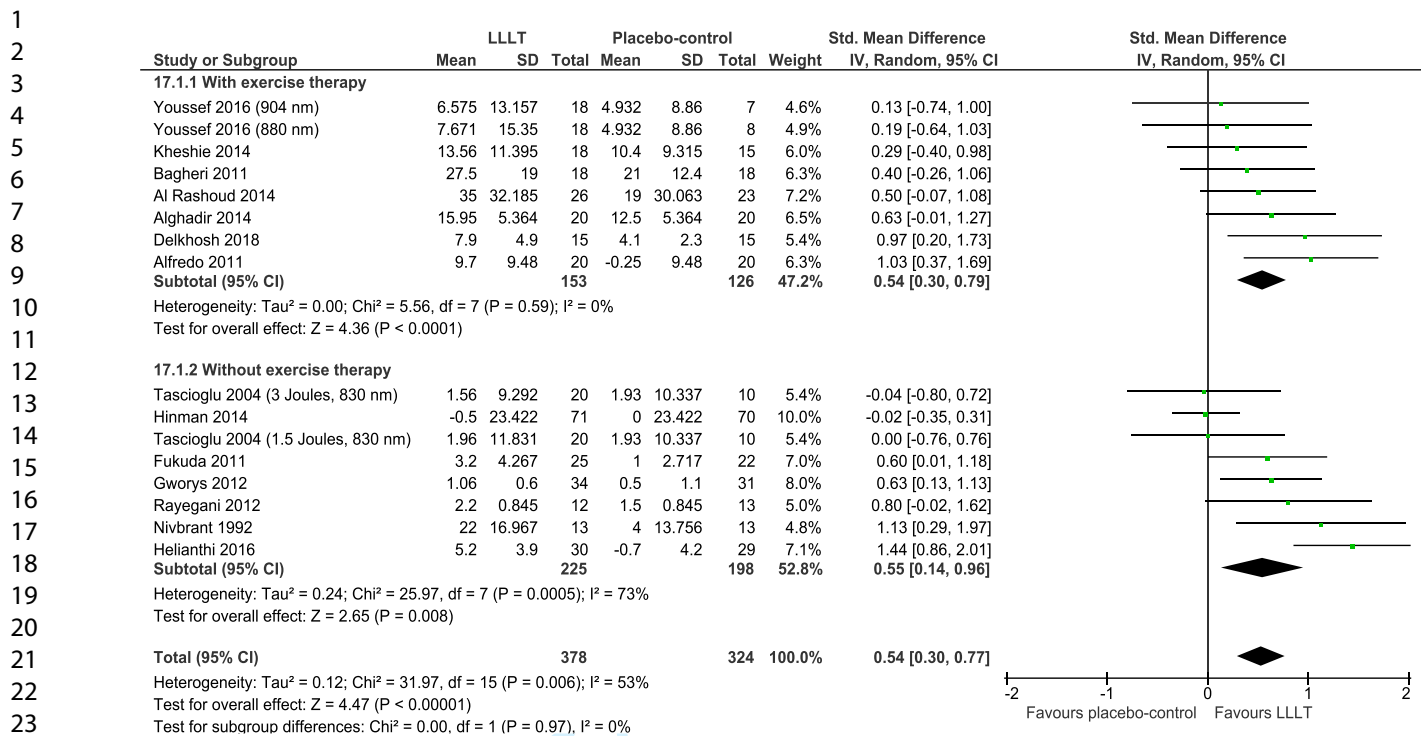

Fig 17 | LLLT with and without exercise therapy (disability)

### Mean Difference vs Standardized Mean Difference

The levels of statistical heterogeneity changed only negligible when we switched from the Mean Difference (MD) method to the Standardized Mean Difference (SMD) method (fig 18-21). The trial by Hegedus et al. was omitted from these analyses as they solely reported final scores, and it is inappropriate to mix final scores with change scores in SMD analyses (fig 18-19).

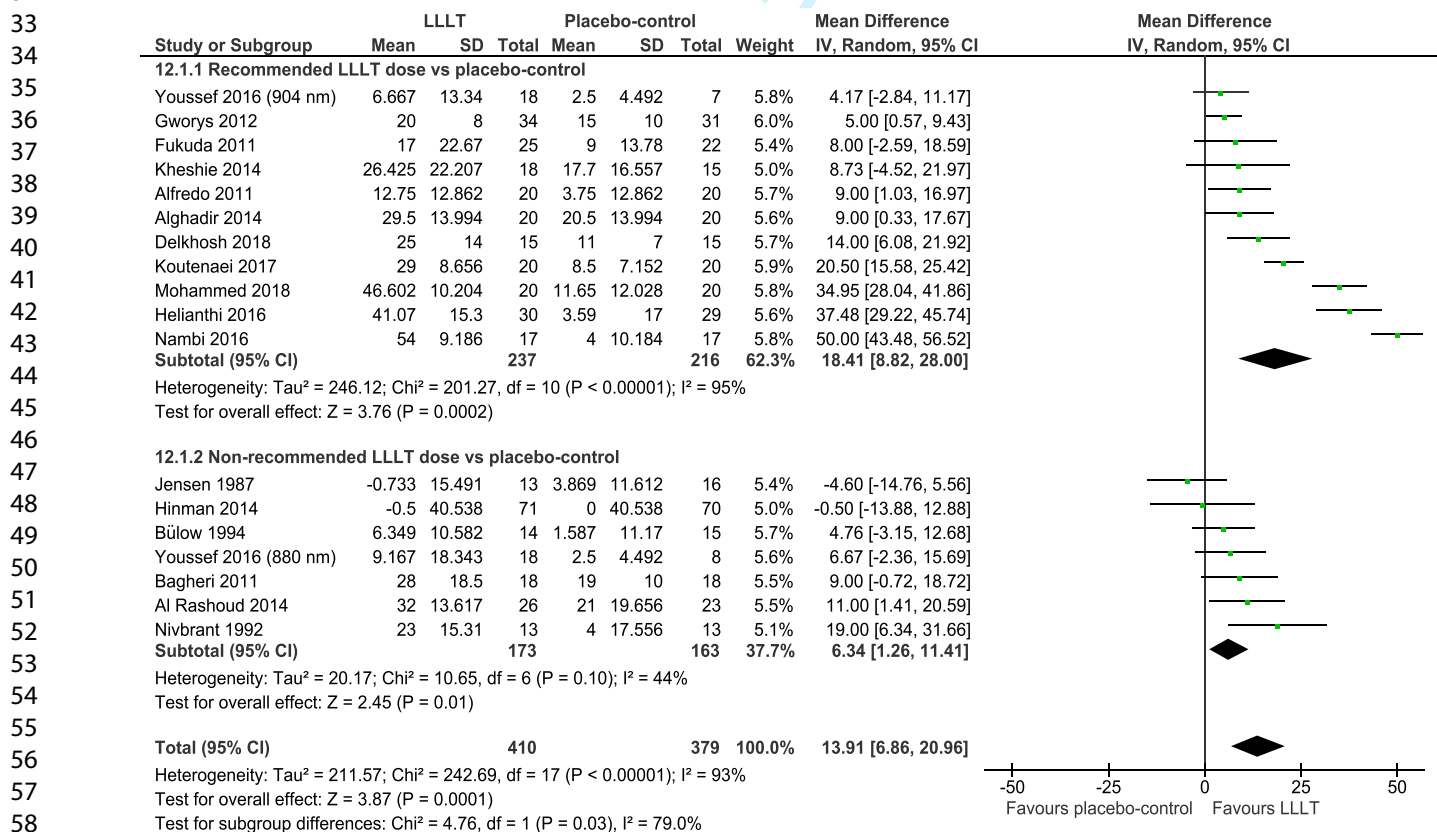

Fig 18 | Mean Difference (pain results from immediately after the end of therapy)

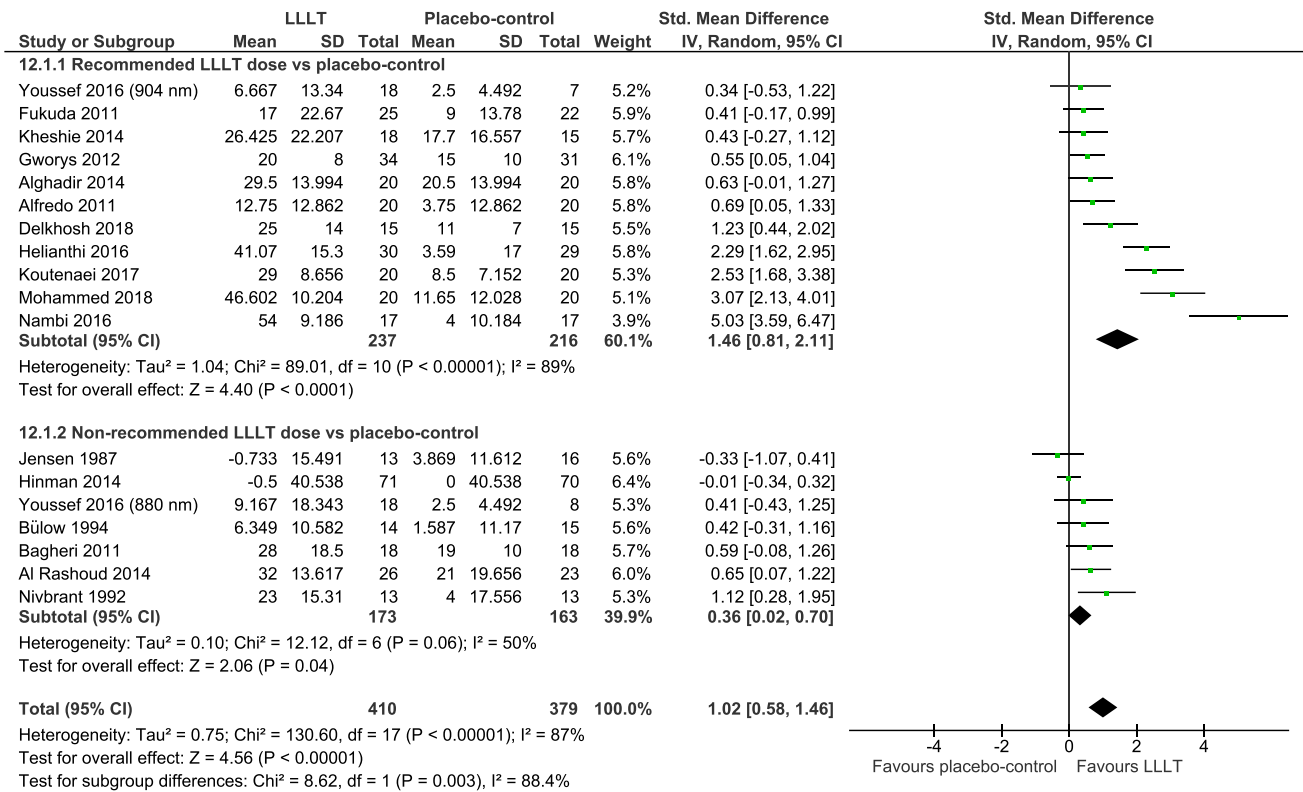

Fig 19 | Standardized Mean Difference (pain results from immediately after the end of therapy)

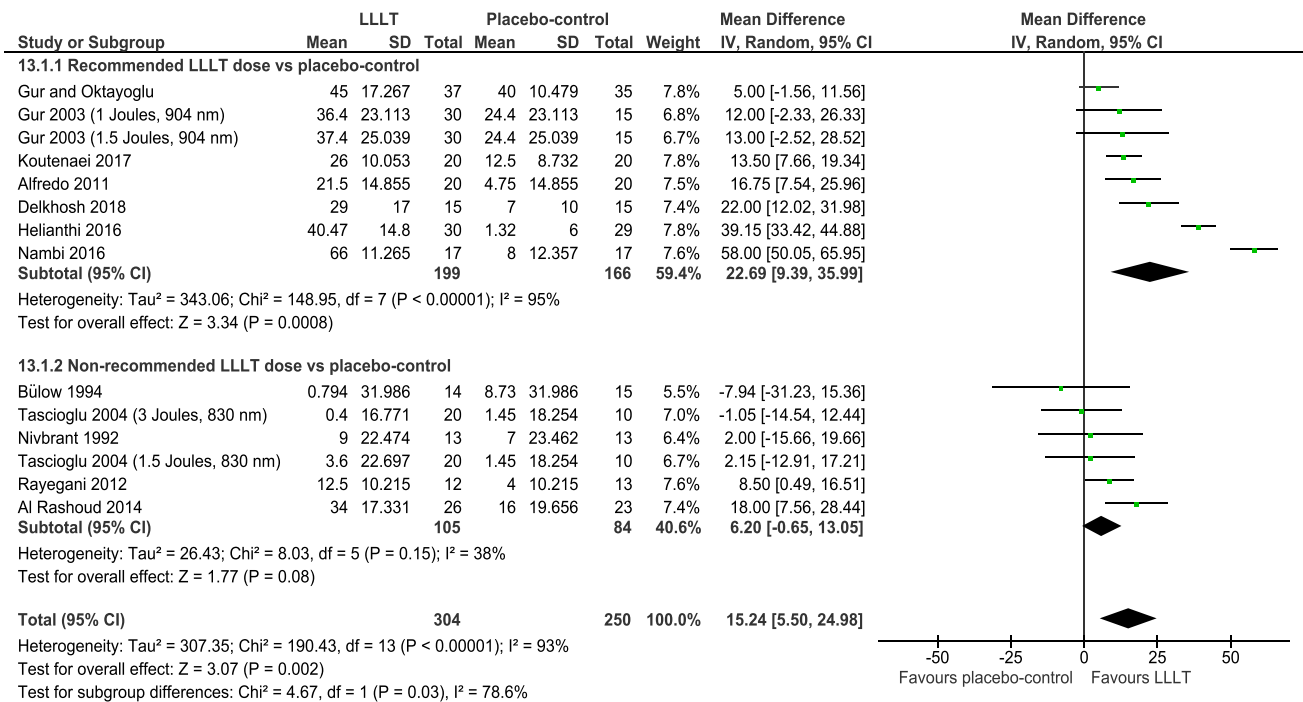

Fig 20 | Mean Difference (pain results from 2-12-weeks follow-ups)

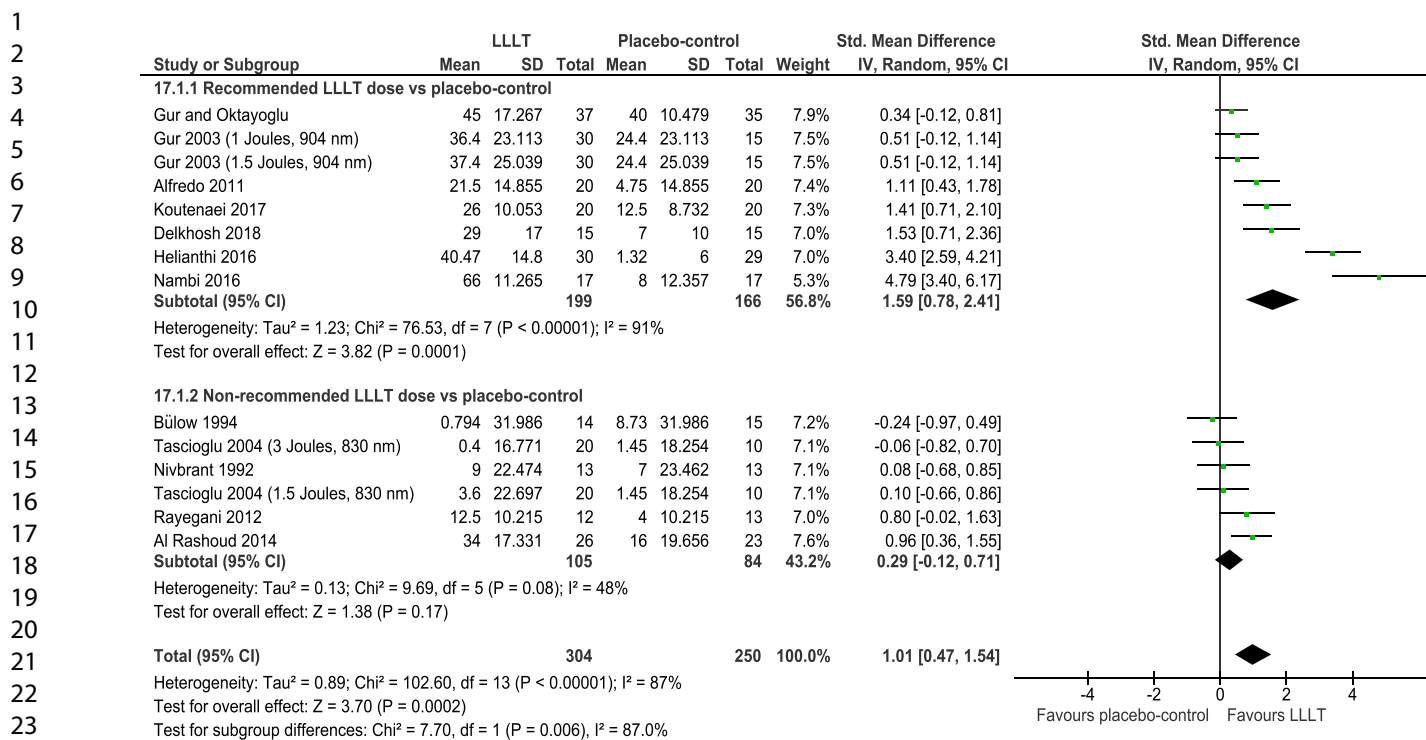

Fig 21 | Standardized Mean Difference (pain results from 2-12-weeks follow-ups)

## References

- Alayat MSM, Aly THA, Elsayed AEM, Fadil ASM. Efficacy of pulsed Nd:YAG laser in the treatment of patients with knee osteoarthritis: A randomized controlled trial. *Lasers Med Sci* 2017; **32**: 503-11.
- Ciechanowska K, Lukowicz M, Weber-Zimmermann M, Buszko K. Ocena skuteczności terapii skojarzonej - Laseroterapii i terapii zinnem z kompresoterapią w leczeniu objawów gonartrozy. *Postępy Rehabilitacji* 2008.
- Coelho, Leal-Junior E, Biasotto-Gonzalez D, et al. Effectiveness of phototherapy incorporated into an exercise program for osteoarthritis of the knee: Study protocol for a randomized controlled trial. *BMC* 2014; **15**.
- de Matos Brunelli Braghin R, Cavalheiro Libardi E, Junqueira C, et al. The effect of low-level laser therapy and physical exercise on pain, stiffness, function, and spatiotemporal gait variables in subjects with bilateral knee osteoarthritis: A blind randomized clinical. *Disabil Rehabil: Epub ahead of print* 2018
- de Meneses SR, Hunter DJ, Young Docko E, Pasqual Marques A. Effect of low-level laser therapy (904 nm) and static stretching in patients with knee osteoarthritis: A protocol of randomised controlled trial. *BMC Musculoskelet Disord* 2015; **16**.
- de Paula Gomes CAF, Leal-Junior ECP, Dibai-Filho AV, et al. Incorporation of photobiomodulation therapy into a therapeutic exercise program for knee osteoarthritis: A placebo-controlled, randomized, clinical trial. *Lasers Surg Med* 2018; **8**: 819-28.
- Giavelli S, Fava G, Castronuovo G, Spinoglio L, Galanti A. Laserterapia con bassa potenza nelle malattie osteoarticolari nel paziente geriatrico. *La Radiologia medica* 1998; **95**: 303-9.
- Gotte S, Keyi W, Wirzbach E. Doppelblindstudie zur Überprüfung der Wirksamkeit und Verträglichkeit einer niederenergetischen Lasertherapie bei Patienten mit aktivierter Gonarthrose [German]. *Jatros Orthopadie* 1995; **12**: 30-4.
- Kujawa J, Talar J, Gworys K, Gworys P, Pieszynski I, Janiszewski M. The analgesic effectiveness of laser therapy in patients with gonarthrosis: An evaluation. *Ortop Traumatol Rehabil* 2004; **6**: 356-66.
- Leal-Junior ECP, Johnson DS, Saltmarche A, Demchak T. Adjunctive use of combination of super-pulsed laser and light-emitting diodes phototherapy on nonspecific knee pain: Double-blinded randomized placebo-controlled trial. *Lasers Med Sci* 2014; **29**: 1839-47.
- Lepilina A, Nikulicheva I, Speranskii V. Laseroterapiia pri revmatoidnom artrite i deformiruiushchem osteoartroze. *Sov Med* 1990: 82-4.
- Marquina N, Dumoulin-White R, Mandel A, Lilge L. Laser therapy applications for osteoarthritis and chronic joint pain - A randomized placebo-controlled clinical trial. *Photonics Lasers Med* 2012; **1**: 299-307.
- Montes-Molina R, Madronero-Agreda MA, Romojaro-Rodriguez AB, et al. Efficacy of



- interferential low-level laser therapy using two independent sources in the treatment of knee pain. *Photomed Laser Surg* 2009; **27**: 467-71.
- 14 Nakamura T, Ebihara S, Ohkuni I, et al. Low level laser therapy for chronic knee joint pain patients. *Laser Ther* 2014; **23**: 273-7.
- 15 Paolillo FR, Paolillo AR, João JP, et al. Ultrasound plus low-level laser therapy for knee osteoarthritis rehabilitation: A randomized, placebo-controlled trial. *Rheumatol int* 2018; **38**: 785-93. doi: 10.1007/s00296-018-4000-x
- 16 Pinfildi CE, Sardim AC, Yi LC, Prado RP. Neuromuscular training with phototherapy associated in patients knee osteoarthritis. *Arch Phys Med Rehabil* 2013; **94**: e59-e60.
- 17 Ren XM, Wang M, Shen XY, Wang LZ, Zhao L. Clinical observation on acupoint irradiation with combined laser or red light on patients with knee osteoarthritis of yang deficiency and cold coagulation type. *Zhongguo Zhen Jiu* 2010; **30**: 977-81.
- 18 Shen X, Zhao L, Ding G, et al. Effect of combined laser acupuncture on knee osteoarthritis: a pilot study. *Lasers med sci* 2009; **24**: 129-36.
- 19 Soleimanpour H, Gahramani K, Taheri R, et al. The effect of low-level laser therapy on knee osteoarthritis: Prospective, descriptive study. *Lasers med sci* 2014; **29**: 1695-700.
- 20 Stelian J, Gil I, Habet B, et al. Improvement of pain and disability in elderly patients with degenerative osteoarthritis of the knee treated with narrow-band light therapy. *J Am Geriatr Soc* 1992; **40**: 23-6.
- 21 Trelles MA, Rigau J, Sala P, Calderhead G, Ohshiro T. Infrared diode laser in low reactive-level laser therapy (LLLT) for knee osteoarthrosis. *Laser Therapy* 1991; **3**: 149-53.
- 22 Wang L, Wu F, Zhao L, et al. Patterns of traditional chinese medicine diagnosis in thermal laser acupuncture treatment of knee osteoarthritis. *Evidence-Based Complementary and Alternative Medicine* 2013.
- 23 Yavuz M, Ataoglu S, Ozsahin M, Baki A, Icmel C. Primer Diz Osteoartritinde İzokinetik Egzersiz, Lazer ve Diklofenak İyontoforezi Uygulamalarının Etkilerinin ve Etkinliklerinin Karşılaştırılması. *Düzce Medical Journal* 2013; **15**: 15-21.
- 24 Yurtkuran M, Alp A, Konur S, Özçakir S, Bingol U. Laser acupuncture in knee osteoarthritis: A double-blind, randomized controlled study. *Photomed Laser Surg* 2007; **25**: 14-20.
- 25 Yuvarani G, Thonisha Xavier L, Mohan Kumar G, et al. To compare the effectiveness between LASER and neuromuscular electrical stimulation in knee osteoarthritis. *Biomedicine (India)* 2018; **38**: 142-46.
- 26 Zhao L, Shen X, Cheng K, et al. Validating a nonacupoint sham control for laser treatment of knee osteoarthritis. *Photomed Laser Surg* 2010; **28**: 351-6.
- 27 Zou YC, Deng HY, Mao Z, Zhao C, Huang J, Liu G. Decreased synovial fluid ghrelin levels are linked with disease severity in primary knee osteoarthritis patients and are increased following laser therapy. *Clin Chim Acta* 2017; **470**: 64-9.

**PRISMA checklist**

| Section/topic                      | #  | Checklist item                                                                                                                                                                                                                                                                                              | Reported on page #                                  |
|------------------------------------|----|-------------------------------------------------------------------------------------------------------------------------------------------------------------------------------------------------------------------------------------------------------------------------------------------------------------|-----------------------------------------------------|
| <b>TITLE</b>                       |    |                                                                                                                                                                                                                                                                                                             |                                                     |
| Title                              | 1  | Identify the report as a systematic review, meta-analysis, or both.                                                                                                                                                                                                                                         | Page 1                                              |
| <b>ABSTRACT</b>                    |    |                                                                                                                                                                                                                                                                                                             |                                                     |
| Structured summary                 | 2  | Provide a structured summary including, as applicable: background; objectives; data sources; study eligibility criteria, participants, and interventions; study appraisal and synthesis methods; results; limitations; conclusions and implications of key findings; systematic review registration number. | Page 1-2                                            |
| <b>INTRODUCTION</b>                |    |                                                                                                                                                                                                                                                                                                             |                                                     |
| Rationale                          | 3  | Describe the rationale for the review in the context of what is already known.                                                                                                                                                                                                                              | Page 2-3                                            |
| Objectives                         | 4  | Provide an explicit statement of questions being addressed with reference to participants, interventions, comparisons, outcomes, and study design (PICOS).                                                                                                                                                  | Page 3 + PROSPERO protocol                          |
| <b>METHODS</b>                     |    |                                                                                                                                                                                                                                                                                                             |                                                     |
| Protocol and registration          | 5  | Indicate if a review protocol exists, if and where it can be accessed (e.g., Web address), and, if available, provide registration information including registration number.                                                                                                                               | Page 3                                              |
| Eligibility criteria               | 6  | Specify study characteristics (e.g., PICOS, length of follow-up) and report characteristics (e.g., years considered, language, publication status) used as criteria for eligibility, giving rationale.                                                                                                      | Page 3-4 + PROSPERO protocol                        |
| Information sources                | 7  | Describe all information sources (e.g., databases with dates of coverage, contact with study authors to identify additional studies) in the search and date last searched.                                                                                                                                  | Page 3 + PROSPERO protocol                          |
| Search                             | 8  | Present full electronic search strategy for at least one database, including any limits used, such that it could be repeated.                                                                                                                                                                               | PROSEPRO protocol                                   |
| Study selection                    | 9  | State the process for selecting studies (i.e., screening, eligibility, included in systematic review, and, if applicable, included in the meta-analysis).                                                                                                                                                   | Page 3-4 + PROSPERO protocol                        |
| Data collection process            | 10 | Describe method of data extraction from reports (e.g., piloted forms, independently, in duplicate) and any processes for obtaining and confirming data from investigators.                                                                                                                                  | Page 4 + PROSPERO protocol                          |
| Data items                         | 11 | List and define all variables for which data were sought (e.g., PICOS, funding sources) and any assumptions and simplifications made.                                                                                                                                                                       | Page 4-8 (table 1-2) + PROSPERO protocol            |
| Risk of bias in individual studies | 12 | Describe methods used for assessing risk of bias of individual studies (including specification of whether this was done at the study or outcome level), and how this information is to be used in any data synthesis.                                                                                      | Page 3 + PROSPERO protocol + supplementary material |
| Summary measures                   | 13 | State the principal summary measures (e.g., risk ratio, difference in means).                                                                                                                                                                                                                               | Page 4 + PROSPERO protocol                          |
| Synthesis of results               | 14 | Describe the methods of handling data and combining results of studies, if done, including measures of consistency (e.g., $I^2$ ) for each meta-analysis.                                                                                                                                                   | Page 4 + supplementary material + PROSPERO protocol |



## PRISMA checklist (continued)

| Section/topic                 | #  | Checklist item                                                                                                                                                                                           | Reported on page #                                           |
|-------------------------------|----|----------------------------------------------------------------------------------------------------------------------------------------------------------------------------------------------------------|--------------------------------------------------------------|
| Risk of bias across studies   | 15 | Specify any assessment of risk of bias that may affect the cumulative evidence (e.g., publication bias, selective reporting within studies).                                                             | Page 3 + supplementary material                              |
| Additional analyses           | 16 | Describe methods of additional analyses (e.g., sensitivity or subgroup analyses, meta-regression), if done, indicating which were pre-specified.                                                         | Page 8-9 + supplementary material                            |
| <b>RESULTS</b>                |    |                                                                                                                                                                                                          |                                                              |
| Study selection               | 17 | Give numbers of studies screened, assessed for eligibility, and included in the review, with reasons for exclusions at each stage, ideally with a flow diagram.                                          | Page 4 + supplementary material (table of excluded articles) |
| Study characteristics         | 18 | For each study, present characteristics for which data were extracted (e.g., study size, PICOS, follow-up period) and provide the citations.                                                             | Page 4-8 (table 1-2)                                         |
| Risk of bias within studies   | 19 | Present data on risk of bias of each study and, if available, any outcome level assessment (see item 12).                                                                                                | Page 8 (figure 6) + supplementary material                   |
| Results of individual studies | 20 | For all outcomes considered (benefits or harms), present, for each study: (a) simple summary data for each intervention group (b) effect estimates and confidence intervals, ideally with a forest plot. | figure 2-5                                                   |
| Synthesis of results          | 21 | Present results of each meta-analysis done, including confidence intervals and measures of consistency.                                                                                                  | Page 8-9 + figure 2-5 + supplementary material               |
| Risk of bias across studies   | 22 | Present results of any assessment of risk of bias across studies (see Item 15).                                                                                                                          | Page 8 + supplementary material                              |
| Additional analysis           | 23 | Give results of additional analyses, if done (e.g., sensitivity or subgroup analyses, meta-regression [see Item 16]).                                                                                    | Page 8-9 + supplementary material                            |
| <b>DISCUSSION</b>             |    |                                                                                                                                                                                                          |                                                              |
| Summary of evidence           | 24 | Summarize the main findings including the strength of evidence for each main outcome; consider their relevance to key groups (e.g., healthcare providers, users, and policy makers).                     | Page 9-10                                                    |
| Limitations                   | 25 | Discuss limitations at study and outcome level (e.g., risk of bias), and at review-level (e.g., incomplete retrieval of identified research, reporting bias).                                            | Page 10                                                      |
| Conclusions                   | 26 | Provide a general interpretation of the results in the context of other evidence, and implications for future research.                                                                                  | Page 10                                                      |
| <b>FUNDING</b>                |    |                                                                                                                                                                                                          |                                                              |
| Funding                       | 27 | Describe sources of funding for the systematic review and other support (e.g., supply of data); role of funders for the systematic review.                                                               | Page 10 + PROSPERO protocol                                  |

# BMJ Open

## Efficacy of low-level laser therapy on pain and disability in knee osteoarthritis: A systematic review and meta-analysis of randomized placebo-controlled trials

|                                 |                                                                                                                                                                                                                                                                                                                                                                                                                                                                                                                                                                                                                                                                                                                                                                                       |
|---------------------------------|---------------------------------------------------------------------------------------------------------------------------------------------------------------------------------------------------------------------------------------------------------------------------------------------------------------------------------------------------------------------------------------------------------------------------------------------------------------------------------------------------------------------------------------------------------------------------------------------------------------------------------------------------------------------------------------------------------------------------------------------------------------------------------------|
| Journal:                        | <i>BMJ Open</i>                                                                                                                                                                                                                                                                                                                                                                                                                                                                                                                                                                                                                                                                                                                                                                       |
| Manuscript ID                   | bmjopen-2019-031142.R1                                                                                                                                                                                                                                                                                                                                                                                                                                                                                                                                                                                                                                                                                                                                                                |
| Article Type:                   | Research                                                                                                                                                                                                                                                                                                                                                                                                                                                                                                                                                                                                                                                                                                                                                                              |
| Date Submitted by the Author:   | 05-Aug-2019                                                                                                                                                                                                                                                                                                                                                                                                                                                                                                                                                                                                                                                                                                                                                                           |
| Complete List of Authors:       | <p>Stausholm, Martin; University of Bergen, Department of Global Public Health and Primary Care<br/> Naterstad, Ingvill; University of Bergen, Department of Global Public Health and Primary Care<br/> Joensen, Jon; University of Bergen, Department of Global Public Health and Primary Care<br/> Lopes-Martins, Rodrigo; Universidade do Vale do Paraíba, Instituto de Pesquisa &amp; Desenvolvimento<br/> Sæbø, Humaira; University of Bergen, Department of Global Public Health and Primary Care<br/> Lund, Hans; Hogskulen pa Vestlandet, Centre for Evidence-Based Practice<br/> Fersum, Kjartan; University of Bergen, Department of Global Public Health and Primary Care<br/> Bjordal, Jan; University of Bergen, Department of Global Public Health and Primary Care</p> |
| <b>Primary Subject Heading</b>: | Rehabilitation medicine                                                                                                                                                                                                                                                                                                                                                                                                                                                                                                                                                                                                                                                                                                                                                               |
| Secondary Subject Heading:      | Public health, Rheumatology                                                                                                                                                                                                                                                                                                                                                                                                                                                                                                                                                                                                                                                                                                                                                           |
| Keywords:                       | Photobiomodulation therapy, Laser therapy < DERMATOLOGY, Knee osteoarthritis, Systematic review, Meta-analysis                                                                                                                                                                                                                                                                                                                                                                                                                                                                                                                                                                                                                                                                        |
|                                 |                                                                                                                                                                                                                                                                                                                                                                                                                                                                                                                                                                                                                                                                                                                                                                                       |

SCHOLARONE™  
Manuscripts

# Efficacy of low-level laser therapy on pain and disability in knee osteoarthritis: A systematic review and meta-analysis of randomized placebo-controlled trials

Martin Bjørn Stausholm<sup>1</sup>, Ingvill Fjell Naterstad<sup>1</sup>, Jon Joensen<sup>1</sup>, Rodrigo Alvaro Brandão Lopes-Martins<sup>2</sup>, Humaira Sæbø<sup>1</sup>, Hans Lund<sup>3</sup>, Kjartan Vibe Fersum<sup>1</sup>, Jan Magnus Bjordal<sup>1</sup>

<sup>1</sup>Department of Global Public Health and Primary Care, University of Bergen, Bergen, Norway

<sup>2</sup>Instituto de Pesquisa & Desenvolvimento, Universidade do Vale do Paraíba, São José dos Campos, Brazil

<sup>3</sup>Centre for Evidence-Based Practice, Western Norway University of Applied Sciences, Bergen, Norway

**Correspondence to:** Martin Bjørn Stausholm [m.b.stausholm@gmail.com](mailto:m.b.stausholm@gmail.com)

**Word count, excluding title page, abstract, references, figures and tables: 3757**

## Abstract

**Objectives** Low-Level Laser Therapy (LLLT) is not recommended in major knee osteoarthritis (KOA) treatment guidelines. We investigated whether a LLLT dose-response relationship exists in KOA, with funding from University of Bergen.

**Design** Systematic review and meta-analysis.

**Data sources** Eligible articles were identified through PubMed, Embase, CINAHL, PEDro and CENTRAL on the 18<sup>th</sup> February 2019, reference lists, a book, citations and experts.

**Eligibility criteria for selecting studies** We solely included randomized placebo-controlled trials involving participants with KOA according to the American College of Rheumatology and/or Kellgren/Lawrence criteria, in which LLLT was applied to participants' knee(s). There were no language restrictions.

**Data extraction and synthesis** The included trials were synthesised with random effects meta-analyses and subgrouped by dose using the World Association for Laser Therapy treatment recommendations. Cochrane's risk of bias tool was used.

**Results** 22 trials (N = 1063) were meta-analysed. Risk of bias was insignificant. Overall, pain was significantly reduced by LLLT compared to placebo at the end of therapy (14.23 mm VAS [95% CI: 7.31-21.14]) and during follow-ups 2-12 weeks later (15.92 mm VAS [95% CI: 6.47-25.37]). The subgroup analysis revealed that pain was significantly reduced by the recommended LLLT doses compared to placebo at the end of therapy (18.71 mm [95% CI: 9.42-27.99]) and during follow-ups 2-12 weeks later (23.23 mm VAS [95% CI: 10.60-35.86]). The pain reduction from the recommended LLLT doses peaked during follow-ups 2-4 weeks after the end of therapy (31.87 mm VAS significantly beyond placebo [95% CI: 18.18-45.56]). Disability was also significantly reduced by LLLT. No adverse events were reported.

**Conclusion** LLLT is safe and offers clinically relevant pain relief and a moderate to large amount of disability reduction in KOA at 4-7 Joules with 785-860 nm wavelength and at 1-3 Joules with 904 nm wavelength per treatment spot.

**PROSPERO registration number** CRD42016035587.

**Keywords** Phototherapy; Laser therapy; Knee osteoarthritis; Systematic review; Meta-analysis

#### Strengths and limitations of this study

- ▶ The review was conducted in conformance with a detailed a priori published protocol, which included e.g. laser dose subgroup criteria.
- ▶ No language restrictions were applied; four (18%) of the included trials were reported in non-English language.
- ▶ A series of meta-analyses were conducted to estimate the effect of Low-Level Laser Therapy on pain over time.
- ▶ Three persons each independently extracted the outcome data from the included trial articles to ensure high reproducibility of the meta-analyses.
- ▶ The review lack quality of life analyses and direct comparisons between Low-Level Laser Therapy and other interventions.

#### Introduction

Approximately 13% of women and 10% of men in the population aged  $\geq 60$  years suffer from knee osteoarthritis (KOA) in the USA.<sup>1</sup> KOA is a degenerative inflammatory disease affecting the entire joint and is characterised by progressive loss of cartilage and associated with pain, disability and reduced quality of life (QoL).<sup>1</sup> Increased inflammatory activity is associated with higher pain intensity and more rapid KOA disease progression.<sup>1 2</sup>

Some of the conservative intervention options for KOA are exercise therapy, Non-Steroidal Anti-Inflammatory Drugs (NSAIDs) and anti-inflammatory Low-Level Laser Therapy (LLLT). There is evidence that exercise therapy reduces pain and disability and improves QoL in persons with KOA.<sup>3</sup> NSAIDs are recommended in most KOA clinical treatment guidelines and is probably the most frequently prescribed therapy category for osteoarthritis, despite intake of these drugs is associated with negative side effects<sup>5</sup>, which is problematic, especially since the disease requires long-term treatment. Furthermore, a recently published network meta-analysis indicates that the pain relieving effect of NSAIDs in KOA beyond placebo is small to moderate (depending on drug type).<sup>6</sup> Likewise, in the first systematic review on this topic, the pain relieving effect of NSAIDs was estimated to only 10.1 mm on the 0-100 mm Visual Analogue Scale (VAS) better than placebo.<sup>7</sup> LLLT is a non-invasive treatment modality<sup>8 9</sup>, which has been reported to induce anti-inflammatory effects<sup>9-14</sup>. LLLT was compared to NSAID in rats with KOA by Tomazoni et al. in a laboratory; NSAID (10 mg diclofenac/knee/session) and LLLT (830 nm wavelength, 6 Joules/knee/session) reduced similar levels of inflammatory cells and metalloproteinase (MP-3 and MP-13). In addition, LLLT reduced the expression of pro-inflammatory cytokines (interleukin-1 $\beta$  and -6 and tumour necrosis factor  $\alpha$ ), myeloperoxidase and prostaglandin E<sub>2</sub> significantly more than NSAID did.<sup>10 11</sup> LLLT has been applied to rabbits with KOA three times per week for eight weeks in a placebo-controlled experiment by Wang et al. At the end of treatment week six, they found that LLLT had significantly reduced pain and synovitis and the production of interleukin-1 $\beta$ , inducible nitric oxide synthase and MP-3 and slowed down loss of Metalloproteinase Inhibitor 1. Two weeks later, LLLT had significantly reduced MP-1 and MP-13 and slowed down loss of collagen II, aggrecan and transforming growth factor beta, and the previous changes were sustained.<sup>12</sup> These findings indicate that the effects of LLLT increase over time.

Pallotta et al. conducted a study on LLLT in rats with acute knee inflammation, which demonstrated that even though LLLT (810 nm) significantly enhanced cyclooxygenase (COX-1 and -2) expression it significantly reduced several other inflammatory makers, i.e., leukocyte infiltration,

1  
2  
3  
4 myeloperoxidase, interleukin-1 and -6 and especially prostaglandin E<sub>2</sub>. Pallotta et al. hypothesised  
5 that the increase in COX levels by LLLT was involved in a production of inflammatory mediators  
6 related to the resolution of the inflammatory process.<sup>14</sup>

7 LLLT is not recommended in major osteoarthritis treatment guidelines. LLLT for KOA was  
8 mentioned in the European League Against Rheumatism (EULAR) osteoarthritis guidelines (2018)  
9 but not recommended<sup>15</sup>, and in the Osteoarthritis Research Society International (OARSI)  
10 guidelines (2018), it was stressed that LLLT should not be considered a core intervention in the  
11 management of KOA.<sup>16</sup>

12 This may be partly due to conflicting results of two recently published reviews on the current topic  
13 (Huang et al. 2015 and Rayegani et al. 2017).<sup>8 17</sup> The conflicting results may arise from omission of  
14 relevant trials<sup>8 17-23</sup> and inadequately addressed LLLT dose-related issues. Only Huang et al.  
15 conducted a LLLT dose-response relationship investigation in KOA, i.e., by subgrouping the trials  
16 by laser dose, but they did not consider that World Association for Laser Therapy (WALT)  
17 recommends applying four times the laser dose with continuous irradiation compared to super-  
18 pulsed irradiation.<sup>17 22 24-26</sup> Thus, it was unknown whether LLLT is effective in KOA, and we saw a  
19 need for a new systematic review.

20 The objectives of the current review were to estimate the effectiveness of LLLT in KOA regarding  
21 knee pain, disability and QoL, and we only considered randomized placebo-controlled clinical trials  
22 (RCTs) for inclusion to minimize risk of bias.

## 23 **Methods**

24 This review was conducted in adherence to a PROSPERO protocol (number CRD42016035587)  
25 and is reported in accordance with the Preferred Reporting Items of Systematic reviews and Meta-  
26 Analysis statement 2009.<sup>27</sup>

### 27 **Literature search and selection of studies**

28 Any identified study was included if it was a randomized placebo-controlled trial involving  
29 participants with KOA according to the American College of Rheumatology tool and/or a  
30 radiographic inspection with the Kellgren/Lawrence (K/L) criteria, in which LLLT was applied to  
31 participants' knee(s) and self-reported pain, disability and/or QoL was reported. There were no  
32 language restrictions.

33 We updated a search for eligible articles indexed in PubMed, Embase, CINAHL, PEDro and  
34 CENTRAL on the 18<sup>th</sup> February 2019. The database search strings contained synonyms for LLLT  
35 and KOA, and keywords were added when optional. The PubMed search string is available in the  
36 supplementary material. The search was continued by reading reference lists of all the eligible trial  
37 and relevant review articles<sup>8 17 28</sup>, citations<sup>29-33</sup>, and a laser book<sup>34</sup> and involving experts in the field.  
38 Two reviewers (MBS and JMB) each independently selected the trial articles. Both reviewers  
39 scrutinised the titles/abstracts of all the publications identified in the search, and any accessible full-  
40 text article was retrieved if it was judged potential eligible by at least one reviewer. Both reviewers  
41 evaluated the full texts of all potentially eligible retrieved articles and made an independent decision  
42 to include or exclude each article, with close attention to the inclusion criteria. When selection  
43 disagreements could not be resolved by discussion, a third reviewer (IFN) made the final  
44 consensus-based decision. Any retrieved article not fulfilling the inclusion criteria was omitted and  
45 listed with reason for exclusion.

### 46 **Risk of bias analysis**

47 Two reviewers (MBS and JJ) each independently evaluated all included trials for risk of bias at the  
48 outcome level, using the Cochrane Collaboration's risk of bias tool.<sup>35</sup> When risk of bias  
49  
50  
51  
52  
53  
54  
55  
56  
57  
58  
59  
60



disagreements could not be resolved by discussion, a third reviewer (IFN) made the final consensus-based decision. Likelihood of publication bias was assessed with graphical funnel plots.<sup>35</sup>

### Data-extraction and meta-analysis

Three reviewers (MBS, JMB and KVF) each independently extracted the data for meta-analysis. Two of the reviewers (MBS and KVF) each independently collected the other trial characteristics. The data-extraction forms were subsequently compared, and data disagreements were resolved by consensus-based discussions. Summary data were extracted, unless published individual participant data were available.<sup>21</sup> The results from the included trials for statistical analysis were selected from outcome scales in adherence to hierarchies published by Juhl et al.<sup>36</sup>

Pain intensity was the primary outcome. As pain reported with continuous, numeric and categorical/Likert scales highly correlates with pain measured using the VAS, the scores of all pain scales were transformed to 0-100%, corresponding to 0-100 mm VAS.<sup>37</sup> The pain results were combined with the Mean Difference (MD) method, primarily using change scores, i.e., when only final scores could be obtained from a trial, change and final scores were mixed in the analysis, since the MD method allows for this without introducing bias.<sup>35</sup>

Self-reported disability results were synthesized using the Standardized Mean Difference (SMD) method using change scores solely. The SMD was adjusted to Hedges' *g* and interpreted as follows: SMDs of 0.2, ~ 0.5, and > 0.8 represent a small, moderate, and large effect, respectively.<sup>35</sup>

Lack of QoL data prohibited an analysis of this outcome.

Random effects meta-analyses were conducted, and impact from heterogeneity (inconsistency) on the analyses was examined using  $I^2$  statistics. An  $I^2$  value of 0% indicates no inconsistency, and an  $I^2$  value of 100% indicates maximal inconsistency<sup>35</sup>; the values were categorised as low (25%), moderate (50%) and high (75%).<sup>38</sup>

Standard deviations (SD) for analysis were extracted or estimated from other variance data in a pre-specified prioritised order: (1) SD, (2) standard error, (3) 95% confidence interval, (4) P-value, (5) interquartile range, (6) median of correlations, (7) visually from graph or (8) other methods.<sup>35</sup>

The trials were subgrouped by adherence and non-adherence to the WALT recommendations for laser dose per treatment spot, as pre-specified. WALT recommends irradiating the knee joint line/synovia with the following laser doses per treatment spot:  $\geq 4$  Joules applied with 5-500 mW mean power using 780-860 nm wavelength and/or  $\geq 1$  Joules applied with 5-500 mW mean power ( $> 1000$  mW peak power) using 904 nm wavelength.<sup>24 25</sup>

The main meta-analyses were conducted using two pre-specified time points of assessment, i.e., immediately after the end of LLLT and last time point of assessment 1-12 weeks after the end of LLLT (follow-up).

MBS performed the meta-analyses, under supervision of JMB, using the software programs Excel 2016 (Microsoft) and Review Manager Version 5.3 (Copenhagen: The Nordic Cochrane Centre, The Cochrane Collaboration, 2014).

### Patient and public involvement

Patients or the public were not involved in the conceptualisation or carrying out of this research.

### Results

In total, 2735 publications were identified in the search, of which 22 trial articles were judged eligible and included in the review (N = 1089) (figure 1 and table 1-2) with data for meta-analysis (N = 1063). Four included trials were not reported in the English language<sup>19 21 23 39</sup> and one included



trial was unpublished (Gur and Oktayoglu). Excluded articles initially judged potentially eligible were listed with reasons for omission (supplementary material).

Figure 1 | Flow chart illustrating the trial identification process  
LLLT = low-level laser therapy.

At the group level, the mean age of the participants was 60.25 (50.11-69) years (data from 19 trials), the mean percentage of women was 69.63 (0-100) (data from 17 trials), the mean BMI of the participants was 29.55 (25.8-38) (data from 14 trials), the mean of median K/L grades was 2.37 (data from 13 trials) and the mean baseline pain was 63.61 mm VAS (35.25-92) (data from 22 trials). LLLT was used as an adjunct to exercise therapy in eleven trials. The mean duration of the treatment periods was 3.53 weeks with the recommended LLLT doses and 3.89 weeks with the non-recommended LLLT doses (table 1-2). Non-recommended LLLT doses were applied in nine of the trials. That is, Al Rashoud et al.<sup>31</sup>, Bülow et al.<sup>20</sup>, Tascioglu et al.<sup>40</sup> and Bagheri et al.<sup>23</sup> applied too few (< 4) Joules per treatment spot with 830 nm wavelength, Jensen et al.<sup>21</sup>, Nivbrant et al.<sup>19</sup> and Hinman et al.<sup>41</sup> applied too few (< 1) Joules per treatment spot with 904 nm wavelength and Youssef et al.<sup>42</sup> (one group) and Rayegani et al.<sup>43</sup> used continuous laser with too long of a wavelength (880 nm) (table 2). No adverse event was reported by any of the trial authors. None of the authors stated receiving funding from the laser industry (supplementary material).

Table 1 | Characteristics of the included trials

| First author                        | Intervention group at baseline                                                        | Control group at baseline                                                             | Intervention vs control programme                                                                                                               | Outcome scales, week of assessment after baseline                                               |
|-------------------------------------|---------------------------------------------------------------------------------------|---------------------------------------------------------------------------------------|-------------------------------------------------------------------------------------------------------------------------------------------------|-------------------------------------------------------------------------------------------------|
| Al Rashoud 2014 <sup>31</sup>       | N: 26<br>Women: 62%<br>Age: 52 years<br>BMI: 38<br>VAS pain: 64 mm<br>K/L: -          | N: 23<br>Women: 65%<br>Age: 56 years<br>BMI: 37.1<br>VAS pain: 59 mm<br>K/L: -        | 3 weeks of exercise therapy, advice, and LLLT vs 3 weeks of exercise therapy, advice, and sham LLLT                                             | Pain: VAS (movement)<br>Disability: SKFS<br>QoL: -<br>Week of assessment: 2, 3, 9, 29           |
| Alfredo 2011/2018 <sup>29, 44</sup> | N: 24<br>Women: 75%<br>Age: 61.15 years<br>BMI: 30.16<br>VAS pain: 53.2 mm<br>K/L: 3  | N: 22<br>Women: 80%<br>Age: 62.25 years<br>BMI: 29.21<br>VAS pain: 35.4 mm<br>K/L: 2  | 3 weeks of LLLT followed by 8 weeks of exercise therapy vs 3 weeks of sham LLLT followed by 8 weeks of exercise therapy                         | Pain: WOMAC<br>Disability: WOMAC<br>QoL: -<br>Week of assessment: 3, 11, 24, 37                 |
| Alghadir 2014 <sup>32</sup>         | N: 20<br>Women: 50%<br>Age: 55.2 years<br>BMI: 32.34<br>VAS pain: 74.5 mm<br>K/L: 2   | N: 20<br>Women: 40%<br>Age: 57 years<br>BMI: 33.09<br>VAS pain: 75.5 mm<br>K/L: 2     | 4 weeks of exercise therapy, heat packs, and LLLT vs 4 weeks of exercise therapy, heat packs, and sham LLLT                                     | Pain: WOMAC<br>Disability: WOMAC<br>QoL: -<br>Week of assessment: 4                             |
| Bagheri 2011 <sup>23</sup>          | N: 18<br>Women: 83.13%<br>Age: 58.32 years<br>BMI: 28.87<br>VAS pain: 67 mm<br>K/L: - | N: 18<br>Women: 83.13%<br>Age: 56.14 years<br>BMI: 27.66<br>VAS pain: 59 mm<br>K/L: - | 5 weeks of exercise therapy, therapeutic ultrasound, TENS, and LLLT vs 5 weeks of exercise therapy, therapeutic ultrasound, TENS, and sham LLLT | Pain: WOMAC (VAS) 0-100<br>Disability: WOMAC<br>QoL: -<br>Week of assessment: 5                 |
| Bülow 1994 <sup>20</sup>            | N: 14<br>Women: -<br>Age: -<br>BMI: -<br>VAS pain: 65.08 mm<br>K/L: -                 | N: 15<br>Women: -<br>Age: -<br>BMI: -<br>VAS pain: 56.35 mm<br>K/L: -                 | 3 weeks of LLLT vs 3 weeks of sham LLLT                                                                                                         | Pain: 0-121 Likert scale (movement/rest)<br>Disability: -<br>QoL: -<br>Week of assessment: 3, 6 |
| Delkhosh 2018 <sup>39</sup>         | N: 15<br>Women: 100%<br>Age: 55.9 years<br>BMI: 26.5<br>VAS pain: 57 mm<br>K/L: -     | N: 15<br>Women: 100%<br>Age: 58.3 years<br>BMI: 27.8<br>VAS pain: 45 mm<br>K/L: -     | 2 weeks of exercise therapy, therapeutic ultrasound, TENS, and LLLT vs 2 weeks of exercise therapy, therapeutic ultrasound, TENS, and sham LLLT | Pain: VAS<br>Disability: WOMAC<br>QoL: -<br>Week of assessment: 2, 8                            |
| Fukuda 2011 <sup>30</sup>           | N: 25<br>Women: 80%                                                                   | N: 22<br>Women: 64%                                                                   | 3 weeks of LLLT vs 3 weeks of sham LLLT                                                                                                         | Pain: VNSP (movement)<br>Disability: Lequesne                                                   |

|                                     |                                                                                        |                                                                                      |                                                                                           |                                                                                              |
|-------------------------------------|----------------------------------------------------------------------------------------|--------------------------------------------------------------------------------------|-------------------------------------------------------------------------------------------|----------------------------------------------------------------------------------------------|
|                                     | Age: 63 years<br>BMI: 30<br>VAS pain: 61 mm<br>K/L: 2                                  | Age: 63 years<br>BMI: 30<br>VAS pain: 62 mm<br>K/L: 2                                |                                                                                           | QoL: -<br>Week of assessment: <b>3</b>                                                       |
| Gur 2003 <sup>33</sup> (1.5 Joules) | N: 30<br>Women: 83.3%<br>Age: 58.64 years<br>BMI: 31.17<br>VAS pain: 73.2 mm<br>K/L: 2 | N: 30<br>Women: 80%<br>Age: 60.52 years<br>BMI: 30.27<br>VAS pain: 67.4 mm<br>K/L: 2 | 14 weeks of exercise and 2 weeks of LLLT vs 14 weeks of exercise and 2 weeks of sham LLLT | Pain: VAS (movement)<br>Disability: -<br>QoL: -<br>Week of assessment: <b>6, 10, 14</b>      |
| Gur 2003 <sup>33</sup> (1 Joules)   | N: 30<br>Women: 76.7%<br>Age: 59.8 years<br>BMI: 28.49<br>VAS pain: 74.4 mm<br>K/L: 2  | N: 30<br>Women: 80%<br>Age: 60.52 years<br>BMI: 30.27<br>VAS pain: 67.4 mm<br>K/L: 2 | 14 weeks of exercise and 2 weeks of LLLT vs 14 weeks of exercise and 2 weeks of sham LLLT | Pain: VAS (movement)<br>Disability: -<br>QoL: -<br>Week of assessment: <b>6, 10, 14</b>      |
| Gur and Oktayoglu                   | N: 40<br>Women: 75%<br>Age: 58.2 years<br>BMI: 29.11<br>VAS pain: 88 mm<br>K/L: 3      | N: 40<br>Women: 72.5%<br>Age: 58.26 years<br>BMI: 30.11<br>VAS pain: 92 mm<br>K/L: 3 | 14 weeks of exercise and 2 weeks of LLLT vs 14 weeks of exercise and 2 weeks of sham LLLT | Pain: VAS (movement)<br>Disability: -<br>QoL: -<br>Week of assessment: <b>6, 10, 14</b>      |
| Gworys 2012 <sup>18</sup>           | N: 34<br>Women: -<br>Age: 57.6<br>BMI: -<br>VAS pain: 54 mm<br>K/L: -                  | N: 31<br>Women: -<br>Age: 67.7<br>BMI: -<br>VAS pain: -<br>K/L: -                    | 2 weeks of LLLT vs 2 weeks of sham LLLT                                                   | Pain: VAS<br>Disability: Lequesne<br>QoL: -<br>Week of assessment: <b>2</b>                  |
| Hegedus 2009 <sup>45</sup>          | N: 18<br>Women: -<br>Age: -<br>BMI: -<br>VAS pain: 57.5 mm<br>K/L: 2                   | N: 17<br>Women: -<br>Age: -<br>BMI: -<br>VAS pain: 56.2 mm<br>K/L: 2                 | 4 weeks of LLLT vs 4 weeks of sham LLLT                                                   | Pain: VAS<br>Disability: -<br>QoL: -<br>Week of assessment: <b>4, 6, 12</b>                  |
| Helianthi 2016 <sup>46</sup>        | N: 30<br>Women: 60%<br>Age: 69 years<br>BMI: 25.8<br>VAS pain: 60.2 mm<br>K/L: 3       | N: 29<br>Women: 82.8%<br>Age: 68 years<br>BMI: 26.3<br>VAS pain: 54.1 mm<br>K/L: 3   | 5 weeks of LLLT vs 5 weeks of sham LLLT                                                   | Pain: VAS (movement)<br>Disability: Lequesne<br>QoL: -<br>Week of assessment: <b>2, 5, 7</b> |
| Hinman 2014 <sup>41</sup>           | N: 71<br>Women: 39%<br>Age: 63.4 years<br>BMI: 30.7<br>VAS pain: 41.5 mm<br>K/L: -     | N: 70<br>Women: 56%<br>Age: 63.8 years<br>BMI: 28.8<br>VAS pain: 43 mm<br>K/L: -     | 12 weeks of LLLT vs 12 weeks of sham LLLT                                                 | Pain: WOMAC<br>Disability: WOMAC<br>QoL: AQoL-6D<br>Week of assessment: <b>12, 52</b>        |
| Jensen 1987 <sup>21</sup>           | N: 13<br>Women: -<br>Age: -<br>BMI: -<br>VAS pain: 67 mm<br>K/L: -                     | N: 16<br>Women: -<br>Age: -<br>BMI: -<br>VAS pain: 72.6 mm<br>K/L: -                 | 1 week of LLLT vs 1 week of sham LLLT                                                     | Pain: 0-21 (movement)<br>Disability: -<br>QoL: -<br>Week of assessment: <b>1</b>             |
| Kheshie 2014 <sup>47</sup>          | N: 18<br>Women: 0%<br>Age: 56.56 years<br>BMI: 28.62<br>VAS pain: 76.8 mm<br>K/L: 2.5  | N: 15<br>Women: 0%<br>Age: 55.6 years<br>BMI: 28.51<br>VAS pain: 78.7 mm<br>K/L: 2.5 | 6 weeks of exercise and LLLT vs 6 weeks of exercise and sham LLLT                         | Pain: WOMAC<br>Disability: WOMAC<br>QoL: -<br>Week of assessment: <b>6</b>                   |
| Koutenaai 2017 <sup>48</sup>        | N: 20<br>Women: 85%<br>Age: 52.3 years<br>BMI: 28.4<br>VAS pain: 74 mm<br>K/L: 3       | N: 20<br>Women: 80%<br>Age: 53 years<br>BMI: 28.6<br>VAS pain: 65.5 mm<br>K/L: 3     | 2 weeks of exercise and LLLT vs 2 weeks of exercise and sham LLLT                         | Pain: VAS (movement)<br>Disability: -<br>QoL: -<br>Week of assessment: <b>2, 4</b>           |
| Mohammed 2018 <sup>49</sup>         | N: 20<br>Women: 85%<br>Age: 55.25 years<br>BMI: ≥ 25<br>VAS pain: 70 mm<br>K/L: 2      | N: 20<br>Women: 85%<br>Age: 50.11 years<br>BMI: ≥ 25<br>VAS pain: 80 mm<br>K/L: 2    | 4 weeks of LLLT vs 4 weeks of sham LLLT                                                   | Pain: VAS<br>Disability: -<br>QoL: -<br>Week of assessment: <b>4</b>                         |
| Nambi 2016 <sup>50</sup>            | N: 17<br>Women: -                                                                      | N: 17<br>Women: -                                                                    | 4 weeks of exercise, kinesio tape, and LLLT vs 4 weeks                                    | Pain: VAS<br>Disability: -                                                                   |

|                                           |                                                                                         |                                                                                       |                                                                   |                                                                                                        |
|-------------------------------------------|-----------------------------------------------------------------------------------------|---------------------------------------------------------------------------------------|-------------------------------------------------------------------|--------------------------------------------------------------------------------------------------------|
|                                           | Age: 58<br>BMI: 26.9<br>VAS pain: 78 mm<br>K/L: 3.1                                     | Age: 60<br>BMI: 28.3<br>VAS pain: 76 mm<br>K/L: 3.2                                   | of exercise, kinesio tape, and sham LLLT                          | QoL: -<br>Week of assessment: <b>4, 8</b>                                                              |
| Nivbrant 1992 <sup>19</sup>               | N: 15<br>Women: 69.2%<br>Age: 69 years<br>BMI: -<br>VAS pain: 67 mm<br>K/L: -           | N: 15<br>Women: 84.6%<br>Age: 66 years<br>BMI: -<br>VAS pain: 58 mm<br>K/L: -         | 2 weeks of LLLT vs 2 weeks of sham LLLT                           | Pain: VAS (movement)<br>Disability: Walking disability<br>QoL: -<br>Week of assessment: <b>2, 3, 6</b> |
| Rayegani 2012 <sup>43</sup>               | N: 12<br>Women: 83.3%<br>Age: 61.7 years<br>BMI: -<br>VAS pain: 63 mm<br>K/L: < 4       | N: 13<br>Women: 92.3%<br>Age: 61.2 years<br>BMI: -<br>VAS pain: 52 mm<br>K/L: < 4     | 2 weeks of LLLT vs 2 weeks of sham LLLT                           | Pain: WOMAC<br>Disability: WOMAC<br>QoL: -<br>Week of assessment: <b>6, 14</b>                         |
| Tascioglu 2004 <sup>40</sup> (3 Joules)   | N: 20<br>Women: 70%<br>Age: 62.86 years<br>BMI: 27.56<br>VAS pain: 68 mm<br>K/L: 2      | N: 20<br>Women: 65%<br>Age: 64.27 years<br>BMI: 29.56<br>VAS pain: 63.88 mm<br>K/L: 2 | 10 days of LLLT vs 10 days of sham LLLT                           | Pain: WOMAC<br>Disability: WOMAC<br>QoL: -<br>Week of assessment: <b>3, 26</b>                         |
| Tascioglu 2004 <sup>40</sup> (1.5 Joules) | N: 20<br>Women: 75%<br>Age: 59.92 years<br>BMI: 28.63<br>VAS pain: 65.72 mm<br>K/L: 2.5 | N: 20<br>Women: 65%<br>Age: 64.27 years<br>BMI: 29.56<br>VAS pain: 63.88 mm<br>K/L: 2 | 10 days of LLLT vs 10 days of sham LLLT                           | Pain: WOMAC<br>Disability: WOMAC<br>QoL: -<br>Week of assessment: <b>3, 26</b>                         |
| Youssef 2016 <sup>42</sup> (904 nm)       | N: 18<br>Women: 66.7%<br>Age: 67.5<br>BMI: < 40<br>VAS pain: 51.67 mm<br>K/L: 2         | N: 15<br>Women: 66.7%<br>Age: 66.3 years<br>BMI: < 40<br>VAS pain: 50.00 mm<br>K/L: 2 | 8 weeks of exercise and LLLT vs 8 weeks of exercise and sham LLLT | Pain: WOMAC<br>Disability: WOMAC<br>QoL: -<br>Week of assessment: <b>8</b>                             |
| Youssef 2016 <sup>42</sup> (880 nm)       | N: 18<br>Women: 61.1%<br>Age: 67.3<br>BMI: < 40<br>VAS pain: 52.50 mm<br>K/L: 2         | N: 15<br>Women: 66.7%<br>Age: 66.3 years<br>BMI: < 40<br>VAS pain: 50.00 mm<br>K/L: 2 | 8 weeks of exercise and LLLT vs 8 weeks of exercise and sham LLLT | Pain: WOMAC<br>Disability: WOMAC<br>QoL: -<br>Week of assessment: <b>8</b>                             |

VAS = Visual Analogue Scale; VNPS = visual numerical pain scale; WOMAC = Western Ontario and McMaster Universities Osteoarthritis Index; NRS = Numeric Rating Scale; DIQ = Disability Index Questionnaire; SKFS = Saudi Knee Function Scale; QoL = Quality of life; AQoL-6D = Assessment of Quality of Life 6 Dimensions; TENS = transcutaneous electrical nerve stimulation.

The values for age and Body Mass Index (BMI) are means and the values for the Kellgren/Lawrence (K/L) grade are medians. Baseline VAS scores have been extracted or estimated as described in the method section. Week of assessment in bold denotes time point used for the main meta-analyses.

Table 2 | Laser characteristics of the included trials

| First author                         | Treated area                                                         | Wave-length (nm) | Joules per treatment spot | Mean output (mW) | Seconds per treated spot | Number of spots treated | Sessions/sessions per week |
|--------------------------------------|----------------------------------------------------------------------|------------------|---------------------------|------------------|--------------------------|-------------------------|----------------------------|
| Al Rashoud 2014 <sup>31*</sup>       | Knee joint line (medial and lateral) and acupoints (SP9, SP10, ST36) | 830              | 1.2                       | 30               | 40                       | 5                       | 9/3                        |
| Alfredo 2011, 2018 <sup>29, 44</sup> | Knee joint line (medial and lateral)                                 | 904              | 3                         | 60               | 50                       | 9                       | 9/3                        |
| Alghadir 2014 <sup>32</sup>          | Knee condyles, joint line (medial and lateral), and popliteal fossa  | 850              | 6                         | 100              | 60                       | 8                       | 8/2                        |
| Bagheri 2011 <sup>23*</sup>          | Knee joint line                                                      | 830              | 3                         | 30               | 100                      | 10                      | 10/5                       |
| Bülow 1994 <sup>20*</sup>            | Painful spots in 0-10 cm radius of the knee joint line               | 830              | 1.5-4.5                   | 25               | 60-180                   | 5-15                    | 9/3                        |
| Delkhosh 2018 <sup>39</sup>          | Knee joint                                                           | 830              | 5                         | 30               | 167                      | 5                       | 10/5                       |
| Fukuda 2011 <sup>30</sup>            | Front knee capsule                                                   | 904              | 3                         | 60               | 50                       | 9                       | 9/3                        |
| Gur 2003 <sup>33</sup> (1.5 Joules)  | Antero-lateral and antero-medial portal of the knee                  | 904              | 1.5                       | 10               | 150                      | 2                       | 10/2                       |

|                                            |                                                                         |     |       |      |     |   |             |
|--------------------------------------------|-------------------------------------------------------------------------|-----|-------|------|-----|---|-------------|
| Gur 2003 <sup>33</sup> (1 Joules)          | Antero-lateral and antero-medial portal of the knee                     | 904 | 1     | 11.2 | 90  | 2 | 10/2        |
| Gur and Oktayoglu                          | Antero-lateral and antero-medial portal of the knee                     | 904 | 1.5   | 10   | 150 | 2 | 10/2        |
| Gworys 2012 <sup>18</sup>                  | Knee joint line, patellofemoral joint, and popliteal fossa              | 810 | 6.6   | 400  | 16  | 7 | 10/2        |
| Hegedus 2009 <sup>45</sup>                 | Knee joint line, popliteal fossa, and condyles                          | 830 | 6     | 50   | 120 | 8 | 8/2         |
| Helianthi 2016 <sup>46</sup>               | Knee joint line (lateral) and acupoints (ST36, SP9, GB34, EX-LE-4)      | 785 | 4     | 50   | 80  | 5 | 10/2        |
| Hinman 2014 <sup>41*</sup>                 | Acupoints (locations not stated)                                        | 904 | 0.2   | 10   | 20  | 6 | 8-12/0.67-1 |
| Jensen 1987 <sup>21*</sup>                 | Knee joint line (medial and lateral), apex and basis of patellae        | 904 | 0.054 | 0.3  | 180 | 4 | 5/5         |
| Kheshie 2014 <sup>47#</sup>                | Front knee                                                              | 830 | -     | 160  | -   | - | 12/2        |
| Koutenaeei 2017 <sup>48</sup>              | Front knee, popliteal fossa, and femur condyles in the popliteal cavity | 810 | 7     | 100  | 70  | 8 | 10/5        |
| Mohammed 2018 <sup>49</sup>                | Knee joint line (lateral) and acupoints (ST36, Sp10, GB, ashi)          | 808 | 5.4   | 90   | 60  | 7 | 12/3        |
| Nambi 2016 <sup>50</sup>                   | Knee joint line, condyles, and popliteal fossa                          | 904 | 1.5   | 25   | 60  | 8 | 12/4        |
| Nivbrant 1992 <sup>19*</sup>               | Knee joint line (medial and lateral) and acupoints (ST34, SP10, X32)    | 904 | 0.72  | 4    | 180 | 7 | 6/3         |
| Rayegani 2012 <sup>43*</sup>               | Knee joint line and popliteal fossa                                     | 880 | 6     | 50   | 120 | 8 | 10/5        |
| Tascioglu 2004 <sup>40</sup> (3 Joules)*   | Painful spots on the knee                                               | 830 | 3     | 50   | 60  | 5 | 10/5        |
| Tascioglu 2004 <sup>40</sup> (1.5 Joules)* | Painful spots on the knee                                               | 830 | 1.5   | 50   | 30  | 5 | 10/5        |
| Youssef 2016 <sup>42</sup> (904 nm)        | Knee joint line (medial and lateral)                                    | 904 | 3     | 60   | 50  | 9 | 16/2        |
| Youssef 2016 <sup>42</sup> (880 nm)*       | Knee joint line (medial and lateral), epicondyles and popliteal fossa   | 880 | 6     | 50   | 120 | 8 | 16/2        |

\* Non-recommended LLLT dose; # 1250 Joules per session.

Overall, pain was significantly reduced by LLLT compared to the placebo-control at the end of therapy (14.23 mm VAS [95% CI: 7.31 to 21.14];  $I^2 = 93%$ ;  $N = 816$ ) (figure 2) and during follow-ups 2-12 weeks later (15.92 mm VAS [95% CI: 6.47 to 25.37];  $I^2 = 93%$ ;  $N = 581$ ) (figure 3). The dose subgroup analyses demonstrated that pain was significantly reduced by the recommended LLLT doses compared to placebo at the end of therapy (18.71 mm [95% CI: 9.42 to 27.99];  $I^2 = 95%$ ;  $N = 480$ ) (figure 2) and during follow-ups 2-12 weeks later (23.23 mm VAS [95% CI: 10.60 to 35.86];  $I^2 = 95%$ ;  $N = 392$ ) (figure 3). The dose subgroup analyses demonstrated that pain was significantly reduced by the non-recommended LLLT doses compared to placebo at the end of therapy (6.34 mm VAS [95% CI: 1.26 to 11.41];  $I^2 = 44%$ ;  $N = 336$ ) (figure 2), but the difference during follow-ups 2-12 weeks later was not significant (6.20 mm VAS [95% CI: -0.65 to 13.05];  $I^2 = 38%$ ;  $N = 189$ ) (figure 3). The between-subgroup differences (recommended vs non-recommended doses) in pain results were significantly in favour of the recommended LLLT doses regarding both time points ( $P = 0.02$  and  $0.02$ ) (figure 2-3).

Overall, disability was significantly reduced by LLLT compared to placebo at the end of therapy (SMD = 0.59 [95% CI: 0.33 to 0.86];  $I^2 = 57%$ ;  $N = 617$ ) (figure 4) and during follow-ups 2-12 weeks later (SMD = 0.66 [95% CI: 0.23 to 1.09];  $I^2 = 67%$ ;  $N = 289$ ) (figure 5). The dose subgroup analyses demonstrated that disability was significantly reduced by the recommended LLLT doses compared to placebo at the end of therapy (SMD = 0.75 [95% CI: 0.46 to 1.03];  $I^2 = 34%$ ;  $N = 339$ ) (figure 4) and during follow-ups 2-8 weeks later (SMD = 1.31 [95% CI: 0.92 to 1.69];  $I^2 = 0%$ ;  $N = 129$ ) (figure 5). The dose subgroup analyses demonstrated that disability was neither significantly reduced by the non-recommended LLLT doses compared to placebo at the end of therapy (SMD = 0.36 [95% CI: -0.02 to 0.73];  $I^2 = 49%$ ;  $N = 278$ ) (figure 4) nor during follow-ups 2-12 weeks later (SMD = 0.26 [95% CI: -0.06 to 0.58];  $I^2 = 0%$ ;  $N = 160$ ) (figure 5). The between-subgroup differences in disability results were in favour of the recommended LLLT doses over the non-

recommended LLLT doses but only significantly regarding one of two time points ( $P = 0.11$  and  $< 0.0001$ ) (figure 4-5).

No QoL meta-analysis was performed because this outcome was only assessed in a single trial, i.e., by Hinman et al. who applied a non-recommended LLLT dose and reported insignificant results.<sup>41</sup> The funnel plots indicated that there was no publication bias (supplementary material). We additionally checked for small study bias by reducing the statistical weight of the smallest studies through a change from random to fixed effects models and this led to similar mean effect estimates, indicating that there was no small study bias (supplementary material).<sup>35</sup>

Methodological quality of the included trials was judged adequate (low risk of bias), unclear (unclear risk of bias) and inadequate (high risk of bias) in 76%, 18% and 6% instances, respectively. Risk of detection bias and reporting bias appeared low in all the trials. There was a lack of information regarding random sequence generation in five trials, allocation concealment in eleven trials, blinding of therapist in four trials and incomplete outcome data in four trials. Therapist blinding was inadequate in seven trials and there was an inadequate handling of data in a single trial (figure 6). However, risk of bias subgroup-analyses conducted post hoc revealed that there was no statistically significant interaction between the effect estimates and risk of bias, and they did not display a drop in statistical heterogeneity (supplementary material). Support for our risk of bias judgments is available (supplementary material).

The statistical heterogeneity remained the same when we changed from the MD to the SMD method post hoc (supplementary material).

Post hoc analyses demonstrated that LLLT was significantly superior to the placebo both with exercise therapy ( $P = 0.0009$  for pain and  $P < 0.0001$  for disability) and without exercise therapy ( $P = 0.01$  for pain and  $P = 0.008$  for disability) as co-intervention (supplementary material).

Post hoc analyses were performed to more precisely estimate the pain time-effect profile for the recommended LLLT doses by imputing the results of the trials with these doses in subgroups with narrower time intervals. Pain was significantly reduced by the recommended LLLT doses compared to placebo immediately after therapy week 2-3 and 4-8 and at follow-ups 2-4, 6-8 and 12 weeks later; the peak point was 2-4 weeks after the end of therapy (31.87 mm VAS beyond placebo [95% CI: 18.18 to 45.56];  $I^2 = 93%$ ;  $N = 322$ ). The 21- and 34-weeks follow-up pain results were not statistically significant (figure 7 and supplementary material). The statistical heterogeneity in the main pain analyses of the recommended LLLT doses was high ( $I^2 = 95%$ ) (figure 2-3) but the mean statistical heterogeneity of the six subgroups covering the same time period was only moderate ( $I^2 = 58%$ ) (figure 7 and supplementary material).

Figure 2 | Pain results from immediately after the end of therapy

Figure 3 | Pain results from 2-12-weeks follow-ups

Figure 4 | Disability results from immediately after the end of therapy

Figure 5 | Disability results from 2-12-weeks follow-ups

Figure 6 | Risk of bias plot of the included trials

The trials are ranked by pain point effect estimates, i.e., more LLLT positive results in the bottom of the figure; the plot is based on the results from the main pain analyses (immediately after the end of therapy, primarily). Support for our judgements and risk of bias statistical analyses are available (supplementary material).

Figure 7 | Pain time-effect profile (recommended LLLT doses vs placebo-control)

Values on the y-axis are mm VAS pain results. Positive VAS score indicates the recommended LLLT doses are superior to the placebo-control. The related forest plot is available (supplementary material).



VAS = Visual Analogue Scale.

\*\* Recommended LLLT doses are highly statistically significantly superior to the placebo ( $P \leq 0.01$ ).

## Discussion

Our meta-analyses showed that pain and disability were significantly reduced by LLLT compared to placebo. We sub-grouped the included trials according to the WALT recommendations (2010) for laser dose per treatment spot, and this revealed a significant dose-response relationship. We conclude that the recommended LLLT doses offers clinically relevant pain relief in KOA. The non-recommended LLLT doses provided no or little pain and disability reduction.

The absolute Minimally Clinically Important Improvement (MCII) of pain in KOA has been estimated to 19.9, 17 and 9 units on a 0-100 scale in 2005, 2012 and 2015, respectively.<sup>51-53</sup> It is important to note that the MCII of pain is a within-subject improvement and depends on baseline pain intensity.<sup>51-53</sup>

The pain reduction from the recommended LLLT doses was significantly superior to placebo even at follow-ups 12 weeks after the end of therapy, and the difference was greater than 20 mm VAS from the final 4-8 weeks of therapy through follow-ups 6-8 weeks after the end of therapy.

Interestingly, the pain reduction from the recommended LLLT doses peaked at follow-ups 2-4 weeks after the end of therapy (31.87 mm VAS highly significantly beyond placebo).

Disability was significantly reduced by the recommended LLLT doses compared to placebo at the end of therapy by a moderate extent (SMD = 0.75) and during follow-ups 2-8 weeks later to a large extent (SMD = 1.31).

Our clinical findings that the effect of LLLT progresses over time is in line with in vivo results of Wang et al.<sup>12</sup>

Furthermore, we found that LLLT appeared equally effective in KOA patients undergoing and not undergoing exercise therapy.

Risk of bias of the included trials appeared insignificant and could not explain the statistical heterogeneity (supplementary material). We find it plausible that some of the statistical heterogeneity of the overall analyses is associated with the dose subgroup criteria (wavelength specific laser doses per treatment spot) since the mean levels of statistical heterogeneity of the subgroup analyses were consistently lower than the overall levels.

It is unknown to us whether other differences in the LLLT protocols impacted the results.

The statistical heterogeneity in the main pain analyses of the recommended LLLT doses was high, and some of it can be explained by the pooling of results from various time points of assessment given the pain reduction increased and subsequent decreased with time; the pain reduction time profile showed a drop in statistical heterogeneity to a moderate level.

According to WALT, the osteoarthritic knee should be laser irradiated to reduce inflammation and promote tissue repair.<sup>24 25 54</sup> One of the discrepancies from our review and previously published reviews of the same topic is that we omitted the RCT by Yurtkuran et al.<sup>8 17 28 55</sup>, as they solely applied laser to an acupoint located distally from the knee joint (spleen 9).

In line with our findings and the WALT dose recommendations, Joensen et al. (2012) observed that the percentage of laser penetrating rat skin at 810 and 904 nm wavelength was 20 and 38-58, respectively. That is, to deliver the same dose beneath the skin, 2.4 times the energy on the skin surface is required with an 810 nm laser compared to a 904 nm laser device. This may be due to the different wavelengths and/or because 904 nm laser is super-pulsed (pulse peak power  $\geq 10000$  mW typically), whereas shorter wavelength laser is delivered continuously or with less intense pulsation.<sup>26</sup> The estimated median dose applied with the recommended LLLT was six and three Joules per treatment spot with 785-860 and 904 nm wavelength laser, respectively. Most of the trial authors reported LLLT parameters in detail but did not state whether the laser devices were



1  
2  
3  
4 calibrated. That is, in the LLLT trials with non-significant effect estimates, equipment failure  
5 cannot be ruled out.

6 It is important to note that no adverse events were reported by any of the trial authors and the  
7 dropout rate was minor, indicating that LLLT is harmless.

8 The positive effect from LLLT lasts longer than those of widely recommended painkiller drugs<sup>56</sup>,  
9 and future trials with booster sessions of LLLT should be conducted to see if the effect can be  
10 prolonged. The effect of using the NSAID tiaprofenic acid, for example, is probably gone within a  
11 week, unless the treatment is continued.<sup>56</sup> Analyses of LLLT vs NSAIDs in terms of cost-  
12 effectiveness would also provide valuable information.  
13  
14

### 15 **Strengths and limitations of this study**

16 In contrast to previous reviews on the current topic, our review was conducted in conformance with  
17 an a priori published protocol<sup>8 17 28</sup>, which included a detailed plan for statistical analysis (e.g. laser  
18 dose subgroup criteria).

19 Furthermore, this is the first review on this topic without language restrictions<sup>8 17 28</sup>, and this  
20 expansion proved important since four (18%) of the included trials were reported in non-English  
21 language.<sup>19 21 23 39</sup>

22 We conducted a series of meta-analyses illustrating effect of LLLT on pain over time. Three  
23 persons each independently extracted the outcome data from the included trial articles to ensure  
24 high reproducibility of the meta-analyses.

25 This review lacks QoL analyses and direct comparisons between LLLT and other interventions.  
26  
27

### 28 **Conclusions**

29 LLLT is safe and offers clinically relevant pain relief and a moderate to large amount of disability  
30 reduction in KOA at 4-7 Joules with 785-860 nm wavelength and at 1-3 Joules with 904 nm  
31 wavelength per treatment spot on the knee joint.  
32  
33

34  
35 **Contributors:** MBS, JMB and HL wrote the PROSPERO protocol. MBS and JMB selected the trials, with the  
36 involvement of IFN when necessary. MBS and JJ judged the risk of bias, with the involvement of IFN when necessary.  
37 MBS and IFN did the translations. MBS, JMB and KVF extracted the data. MBS performed the analyses, under  
38 supervision of JMB. All the authors participated in interpreting of the results. MBS drafted the first version of the  
39 manuscript, and subsequently revised it, based on comments by RABLM, HS and all the other authors. All the authors  
40 read and accepted the final version of the manuscript.

41 **Funding:** The University of Bergen funded this research. No specific grant from any funding agency in the public,  
42 commercial or not-for-profit sectors was received for this work. The corresponding author had full access to all data in  
43 the study and had the final responsibility for the decision to submit for publication.

44 **Competing interests:** JMB and RABLM are post-presidents and former board members of World Association for  
45 Laser Therapy, a non-for-profit research organization from which they have never received funding, grants or fees. The  
46 other authors declared that they had no conflict of interests related to this work.

47 **Ethical approval:** Not required.

48 **Data sharing:** The dataset for meta-analysis is available from the corresponding author upon reasonable request. The  
49 corresponding author affirms that the manuscript is an honest, accurate and transparent account of the study being  
50 reported; that no important aspects of the study have been omitted; and that any discrepancies from the study as planned  
51 (and, if relevant, registered) have been explained.  
52

- 53 1. Heidari B. Knee osteoarthritis prevalence, risk factors, pathogenesis and features - Part 1. *Caspian J Intern Med*  
54 2011;2:205-12.
- 55 2. Berenbaum F. Osteoarthritis as an inflammatory disease (osteoarthritis is not osteoarthrosis!). *Osteoarthritis*  
56 *cartilage / OARS, Osteoarthritis Research Society* 2013;21:16-21. doi: 10.1016/j.joca.2012.11.012
- 57 3. Bartels EM, Juhl CB, Christensen R, et al. Aquatic exercise for the treatment of knee and hip osteoarthritis.  
58 *Cochrane Database Syst Rev* 2016;3:CD005523. doi: 10.1002/14651858.CD005523.pub3  
59  
60

4. Juhl C, Christensen R, Roos EM, et al. Impact of exercise type and dose on pain and disability in knee osteoarthritis: A systematic review and meta-regression analysis of randomized controlled trials. *Arthritis Rheumatol* 2014;66:622-36. doi: 10.1002/art.38290
5. Rannou F, Pelletier JP, Martel-Pelletier J. Efficacy and safety of oral NSAIDs and analgesics in the management of osteoarthritis: Evidence from real-life setting trials and surveys. *Semin Arthritis Rheum* 2016;45:22-7. doi: 10.1016/j.semarthrit.2015.11.009 [published Online First: 2016/01/26]
6. Bannuru RR, Schmid CH, Kent DM, et al. Comparative effectiveness of pharmacologic interventions for knee osteoarthritis: A systematic review and network meta-analysis. *Ann Intern Med* 2015;162:46-54. doi: 10.7326/m14-1231 [published Online First: 2015/01/07]
7. Bjordal JM, Ljunggren AE, Klovning A, et al. Non-steroidal anti-inflammatory drugs, including cyclo-oxygenase-2 inhibitors, in osteoarthritic knee pain: meta-analysis of randomised placebo controlled trials. *Bmj* 2004;329(7478):1317. doi: 10.1136/bmj.38273.626655.63 [published Online First: 2004/11/25]
8. Rayegani SM, Raeissadat SA, Heidari S, et al. Safety and effectiveness of low-level laser therapy in patients with knee osteoarthritis: A systematic review and meta-analysis. *J Lasers Med Sci* 2017;8:12-19.
9. Hamblin MR. Can osteoarthritis be treated with light? *Arthritis Res Ther* 2013;15(5):120. doi: 10.1186/ar4354 [published Online First: 2013/11/30]
10. Tomazoni SS, Leal-Junior ECP, Pallotta RC, et al. Effects of photobiomodulation therapy, pharmacological therapy, and physical exercise as single and/or combined treatment on the inflammatory response induced by experimental osteoarthritis. *Lasers med sci* 2017;32:101-08. doi: <http://dx.doi.org/10.1007/s10103-016-2091-8>
11. Tomazoni SS, Leal-Junior EC, Frigo L, et al. Isolated and combined effects of photobiomodulation therapy, topical nonsteroidal anti-inflammatory drugs, and physical activity in the treatment of osteoarthritis induced by papain. *J Biomed Opt* 2016;21(10) doi: 10.1117/1.JBO.21.10.108001 [published Online First: 2016/10/19]
12. Wang P, Liu C, Yang X, et al. Effects of low-level laser therapy on joint pain, synovitis, anabolic, and catabolic factors in a progressive osteoarthritis rabbit model. *Lasers med sci* 2014;29(6):1875-85. doi: 10.1007/s10103-014-1600-x [published Online First: 2014/06/04]
13. Assis L, Almeida T, Milares LP, et al. Musculoskeletal Atrophy in an Experimental Model of Knee Osteoarthritis: The Effects of Exercise Training and Low-Level Laser Therapy. *Am J Phys Med Rehabil* 2015;94(8):609-16. doi: 10.1097/phm.0000000000000219 [published Online First: 2014/10/10]
14. Pallotta RC, Bjordal JM, Frigo L, et al. Infrared (810-nm) low-level laser therapy on rat experimental knee inflammation. *Lasers med sci* 2012;27(1):71-78. doi: <http://dx.doi.org/10.1007/s10103-011-0906-1>
15. Geenen R, Overman CL, Christensen R, et al. EULAR recommendations for the health professional's approach to pain management in inflammatory arthritis and osteoarthritis. *Ann Rheum Dis* 2018;77(6):797-807. doi: 10.1136/annrheumdis-2017-212662
16. Collins NJ, Hart HF, Mills KAG. OARSI year in review 2018: Rehabilitation and outcomes. *Osteoarthritis cartilage / OARS, Osteoarthritis Research Society* 2018: Published online 7. dec. 2018. doi.org/10.1016/j.joca.2018.11.010. doi: 10.1016/j.joca.2018.11.010 [published Online First: 2018/12/12]
17. Huang Z, Chen J, Ma J, et al. Effectiveness of low-level laser therapy in patients with knee osteoarthritis: A systematic review and metaanalysis. *Osteoarthritis Cartilage* 2015;23:1437-44.
18. Gworys K, Gasztych J, Puzder A, et al. Influence of various laser therapy methods on knee joint pain and function in patients with knee osteoarthritis. *Ortop Traumatol Rehabil* 2012;14:269-77. doi: 10.5604/15093492.1002257
19. Nivbrant B, Friberg S. Laser tycks ha effekt pa knaledsartros men vetenskapligt bevis saknas [Swedish]. *Lakartidningen [Journal of the Swedish Medical Association]* 1992;89:859-61.
20. Bülow PM, Jensen H, Danneskiold-Samsøe B. Low power Ga-Al-As laser treatment of painful osteoarthritis of the knee. A double-blind placebo-controlled study. *Scand J Rehabil Med* 1994;26:155-9.
21. Jensen H, Harreby M, Kjer J. Infrarød laser -- effekt ved smertende knæartrose? [Danish]. *Ugeskr Laeger* 1987;149:3104-06.
22. Stausholm MB, Bjordal JM, Lopes-Martins RAB, et al. Methodological flaws in meta-analysis of low-level laser therapy in knee osteoarthritis: A letter to the editor. *Osteoarthritis cartilage / OARS, Osteoarthritis Research Society* 2016;25:e9-e10. doi: 10.1016/j.joca.2016.09.022 [published Online First: 2016/11/07]
23. Bagheri SR, Fatemi E, Fazeli SH, et al. Efficacy of low level laser on knee osteoarthritis treatment [Persian]. *Koomesh* 2011;12:285-92.
24. WALT. Recommended treatment doses for Low Level Laser Therapy 780-860 nm wavelength: *World Association for Laser Therapy*; 2010 [Available from: [http://waltza.co.za/wp-content/uploads/2012/08/Dose\\_table\\_780-860nm\\_for\\_Low\\_Level\\_Laser\\_Therapy\\_WALT-2010.pdf](http://waltza.co.za/wp-content/uploads/2012/08/Dose_table_780-860nm_for_Low_Level_Laser_Therapy_WALT-2010.pdf)].

1  
2  
3  
4  
5  
6  
7  
8  
9  
10  
11  
12  
13  
14  
15  
16  
17  
18  
19  
20  
21  
22  
23  
24  
25  
26  
27  
28  
29  
30  
31  
32  
33  
34  
35  
36  
37  
38  
39  
40  
41  
42  
43  
44  
45  
46  
47  
48  
49  
50  
51  
52  
53  
54  
55  
56  
57  
58  
59  
60

25. WALT. Recommended treatment doses for Low Level Laser Therapy 904 nm wavelength: *World Association for Laser Therapy*; 2010 [Available from: [http://waltza.co.za/wp-content/uploads/2012/08/Dose\\_table\\_904nm\\_for\\_Low\\_Level\\_Laser\\_Therapy\\_WALT-2010.pdf](http://waltza.co.za/wp-content/uploads/2012/08/Dose_table_904nm_for_Low_Level_Laser_Therapy_WALT-2010.pdf)].
26. Joensen J, Ovsthus K, Reed RK, et al. Skin penetration time-profiles for continuous 810 nm and Superpulsed 904 nm lasers in a rat model. *Photomed laser surg* 2012;30:688-94. doi: 10.1089/pho.2012.3306 [published Online First: 2012/10/03]
27. Moher DLAT, J.; Altman, DG. Preferred Reporting Items for Systematic Reviews and Meta-Analyses: The PRISMA Statement: *PLoS Med* 2009.
28. Bjordal JM, Johnson MI, Lopes-Martins RA, et al. Short-term efficacy of physical interventions in osteoarthritic knee pain: A systematic review and meta-analysis of randomised placebo-controlled trials. *BMC musculoskeletal disord* 2007;8:51. doi: 10.1186/1471-2474-8-51 [published Online First: 2007/06/26]
29. Alfredo PP, Bjordal JM, Dreyer SH, et al. Efficacy of low level laser therapy associated with exercises in knee osteoarthritis: A randomized double-blind study. *Clin rehabil* 2011;26:523-33. doi: 10.1177/0269215511425962 [published Online First: 2011/12/16]
30. Fukuda VO, Fukuda TY, Guimaraes M, et al. Short-term efficacy of low-level laser therapy in patients with knee osteoarthritis: A randomized placebo-controlled, double-blind clinical trial. *Rev Bras Ortop* 2011;46:526-33. doi: 10.1016/s2255-4971(15)30407-9 [published Online First: 2011/09/01]
31. Al Rashoud AS, Abboud RJ, Wang W, et al. Efficacy of low-level laser therapy applied at acupuncture points in knee osteoarthritis: A randomised double-blind comparative trial. *Physiotherapy* 2014;100(3):242-48. doi: 10.1016/j.physio.2013.09.007
32. Alghadir A, Omar MT, Al-Askar AB, et al. Effect of low-level laser therapy in patients with chronic knee osteoarthritis: A single-blinded randomized clinical study. *Lasers med sci* 2014;29:749-55. doi: 10.1007/s10103-013-1393-3
33. Gur A, Cosut A, Sarac AJ, et al. Efficacy of different therapy regimes of low-power laser in painful osteoarthritis of the knee: A double-blind and randomized-controlled trial. *Lasers surg med* 2003;33:330-38.
34. Tunér J, Hode L. The new laser therapy handbook: A guide for research scientists, doctors, dentists, veterinarians and other interested parties within the medical field. *Grängesberg: Prima Books* 2010.
35. Higgins JPT, Green S. *Cochrane Handbook for Systematic Reviews of Interventions* 2011 [Available from: <http://handbook.cochrane.org/> accessed 3.12. 2015].
36. Juhl C, Lund H, Roos EM, et al. A hierarchy of patient-reported outcomes for meta-analysis of knee osteoarthritis trials: Empirical evidence from a survey of high impact journals. *Arthritis* 2012 doi: 10.1155/2012/136245
37. Bolognese JA, Schnitzer TJ, Ehrich EW. Response relationship of VAS and Likert scales in osteoarthritis efficacy measurement. *Osteoarthritis Cartilage* 2003;11:499-507. doi: 10.1016/s1063-4584(03)00082-7
38. Higgins JP, Thompson SG, Deeks JJ, et al. Measuring inconsistency in meta-analyses. *BMJ* 2003;327:557-60. doi: 10.1136/bmj.327.7414.557 [published Online First: 2003/09/06]
39. Delkhosh CT, Fatemy E, Ghorbani R, et al. Comparing the immediate and long-term effects of low and high power laser on the symptoms of knee osteoarthritis [Persian]. *Journal of mazandaran university of medical sciences* 2018;28(165):69-77.
40. Tascioglu F, Armagan O, Tabak Y, et al. Low power laser treatment in patients with knee osteoarthritis. *Swiss Med Wkly* 2004;134:254-8. doi: 2004/17/smw-10518 [published Online First: 2004/07/10]
41. Hinman RS, McCrory P, Pirota M, et al. Acupuncture for chronic knee pain: A randomized clinical trial. *The JAMA* 2014;312:1313-22. doi: 10.1001/jama.2014.12660
42. Youssef EF, Muaidi QI, Shanb AA. Effect of Laser Therapy on Chronic Osteoarthritis of the Knee in Older Subjects. *Lasers Med Sci* 2016;7:112-9. doi: 10.15171/jlms.2016.19 [published Online First: 2016/06/23]
43. Rayegani SM, Bahrami MH, Elyaspour D, et al. Therapeutic Effects of Low Level Laser Therapy (LLLT) in Knee Osteoarthritis, Compared to Therapeutic Ultrasound. *Lasers Med Sci* 2012;3:71-74.
44. Alfredo PP, Bjordal JM, Junior WS, et al. Long-term results of a randomized, controlled, double-blind study of low-level laser therapy before exercises in knee osteoarthritis: Laser and exercises in knee osteoarthritis. *Clin rehabil* 2018;32:173-78. doi: 10.1177/0269215517723162 [published Online First: 2017/08/05]
45. Hegedus B, Viharos L, Gervain M, et al. The effect of low-level laser in knee osteoarthritis: A double-blind, randomized, placebo-controlled trial. *Photomed laser surg* 2009;27:577-84.
46. Helianthi DR, Simadibrata C, Srilestari A, et al. Pain Reduction After Laser Acupuncture Treatment in Geriatric Patients with Knee Osteoarthritis: A Randomized Controlled Trial. *Acta Med Indones* 2016;48:114-21. [published Online First: 2016/08/24]

- 1  
2  
3  
4  
5  
6  
7  
8  
9  
10  
11  
12  
13  
14  
15  
16  
17  
18  
19  
20  
21  
22  
23  
24  
25  
26  
27  
28  
29  
30  
31  
32  
33  
34  
35  
36  
37  
38  
39  
40  
41  
42  
43  
44  
45  
46  
47  
48  
49  
50  
51  
52  
53  
54  
55  
56  
57  
58  
59  
60
47. Kheshie AR, Alayat MS, Ali MM. High-intensity versus low-level laser therapy in the treatment of patients with knee osteoarthritis: A randomized controlled trial. *Lasers med sci* 2014;29:1371-6. doi: 10.1007/s10103-014-1529-0
  48. Koutenaie FR, Mosallanezhad Z, Naghikhani M, et al. The Effect of Low Level Laser Therapy on Pain and Range of Motion of Patients With Knee Osteoarthritis. *Physical Treatments - Specific Physical Therapy* 2017;7(1):13-18. doi: 10.29252/nrip.ptj.7.1.13
  49. Mohammed N, Allam H, Elghoroury E, et al. Evaluation of serum beta-endorphin and substance P in knee osteoarthritis patients treated by laser acupuncture. *J Complement Integr Med* 2018;15 doi: <http://dx.doi.org/10.1515/jcim-2017-0010>
  50. Nambi SG, Kamal W, George J, et al. Radiological and biochemical effects (CTX-II, MMP-3, 8, and 13) of low-level laser therapy (LLLT) in chronic osteoarthritis in Al-Kharj, Saudi Arabia. *Lasers Med Sci* 2016;32 doi: 10.1007/s10103-016-2114-5 [published Online First: 2016/12/04]
  51. Tubach F, Ravaud P, Baron G, et al. Evaluation of clinically relevant changes in patient reported outcomes in knee and hip osteoarthritis: The minimal clinically important improvement. *Ann Rheum Dis* 2005;64:29-33. doi: 10.1136/ard.2004.022905
  52. Bellamy N, Hochberg M, Tubach F, et al. Development of multinational definitions of minimal clinically important improvement and patient acceptable symptomatic state in osteoarthritis. *Arthritis care & research* 2015;67:972-80. doi: 10.1002/acr.22538 [published Online First: 2015/01/13]
  53. Tubach F, Ravaud P, Martin-Mola E, et al. Minimum clinically important improvement and patient acceptable symptom state in pain and function in rheumatoid arthritis, ankylosing spondylitis, chronic back pain, hand osteoarthritis, and hip and knee osteoarthritis: Results from a prospective multinational study. *Arthritis care & research* 2012;64:1699-707. doi: 10.1002/acr.21747 [published Online First: 2012/06/08]
  54. Lopes-Martins RAB, Marcos RL, Leal-Junior ECP, et al. Low-Level Laser Therapy and World Association for Laser Therapy Dosage Recommendations in Musculoskeletal Disorders and Injuries. *Photomed laser surg* 2018;36:457-59. doi: 10.1089/pho.2018.4493 [published Online First: 2018/09/07]
  55. Yurtkuran M, Alp A, Konur S, et al. Laser acupuncture in knee osteoarthritis: A double-blind, randomized controlled study. *Photomed laser surg* 2007;25:14-20. doi: 10.1089/pho.2006.1093
  56. Scott DL, Berry H, Capell H, et al. The long-term effects of non-steroidal anti-inflammatory drugs in osteoarthritis of the knee: A randomized placebo-controlled trial. *Rheumatology (Oxford, England)* 2000;39:1095-101. [published Online First: 2000/10/18]

1  
2  
3  
4  
5  
6  
7  
8  
9  
10  
11  
12  
13  
14  
15  
16  
17  
18  
19  
20  
21  
22  
23  
24  
25  
26  
27  
28  
29  
30  
31  
32  
33  
34  
35  
36  
37  
38  
39  
40  
41

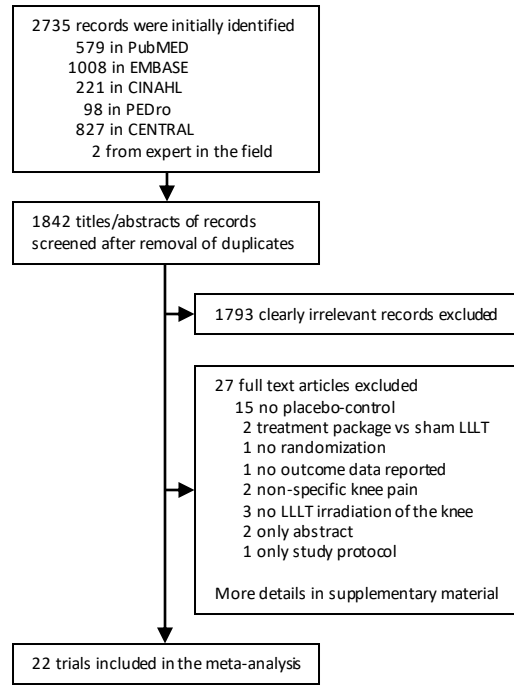

1  
2  
3  
4  
5  
6  
7  
8  
9  
10  
11  
12  
13  
14  
15  
16  
17  
18  
19  
20  
21  
22  
23  
24  
25  
26  
27  
28  
29  
30  
31  
32  
33  
34  
35  
36  
37  
38  
39  
40  
41  
42  
43  
44  
45  
46  
47  
48  
49  
50  
51  
52  
53  
54  
55  
56  
57  
58  
59  
60





1  
2  
3  
4  
5  
6  
7  
8  
9  
10  
11  
12  
13  
14  
15  
16  
17  
18  
19  
20  
21  
22  
23  
24  
25  
26  
27  
28  
29  
30  
31  
32  
33  
34  
35  
36  
37  
38  
39  
40  
41  
42  
43  
44  
45  
46  
47  
48  
49  
50  
51  
52  
53  
54  
55  
56  
57  
58  
59  
60

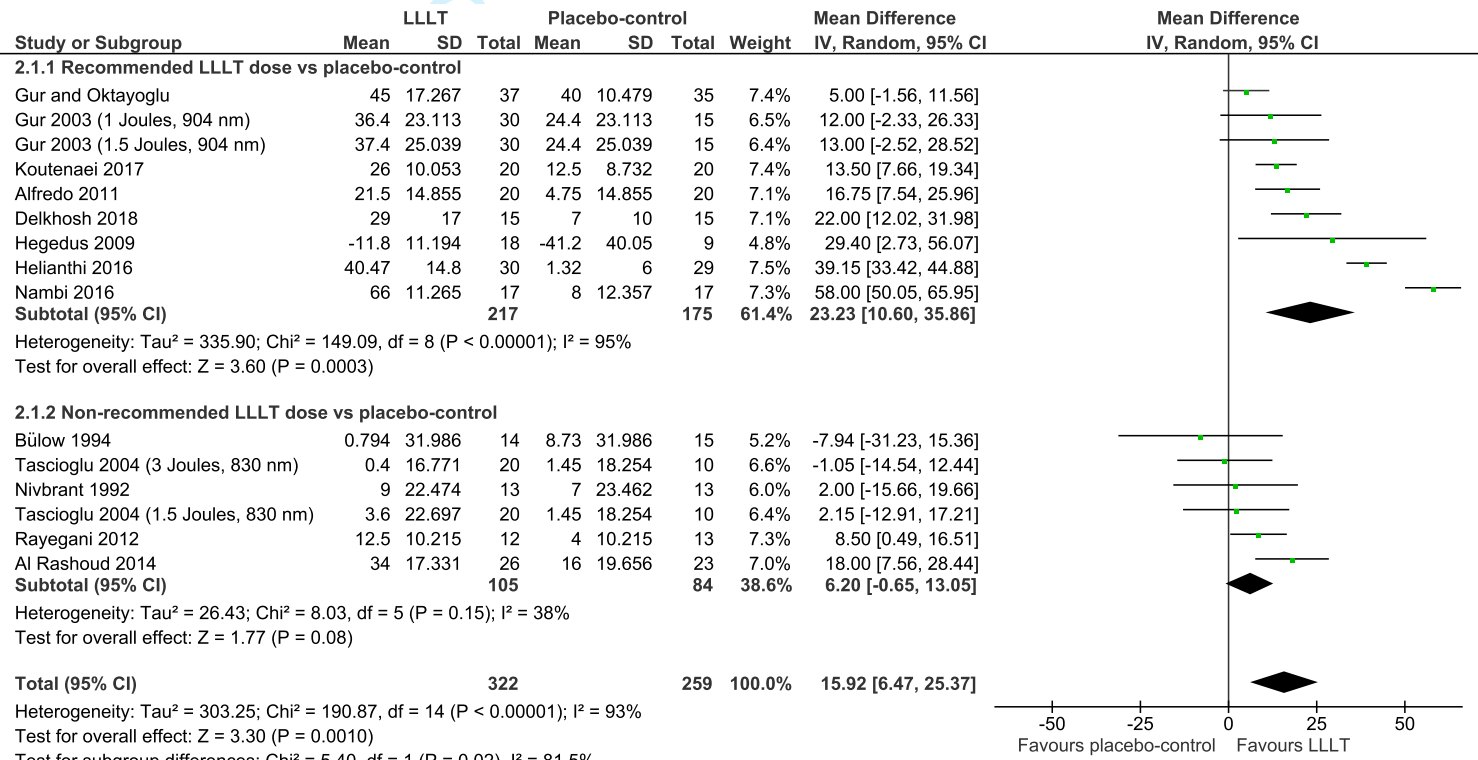

1  
2  
3  
4  
5  
6  
7  
8  
9  
10  
11  
12  
13  
14  
15  
16  
17  
18  
19  
20  
21  
22  
23  
24  
25  
26  
27  
28  
29  
30  
31  
32  
33  
34  
35  
36  
37  
38  
39  
40  
41  
42  
43  
44  
45  
46  
47  
48  
49  
50  
51  
52  
53  
54  
55  
56  
57  
58  
59  
60

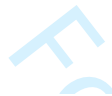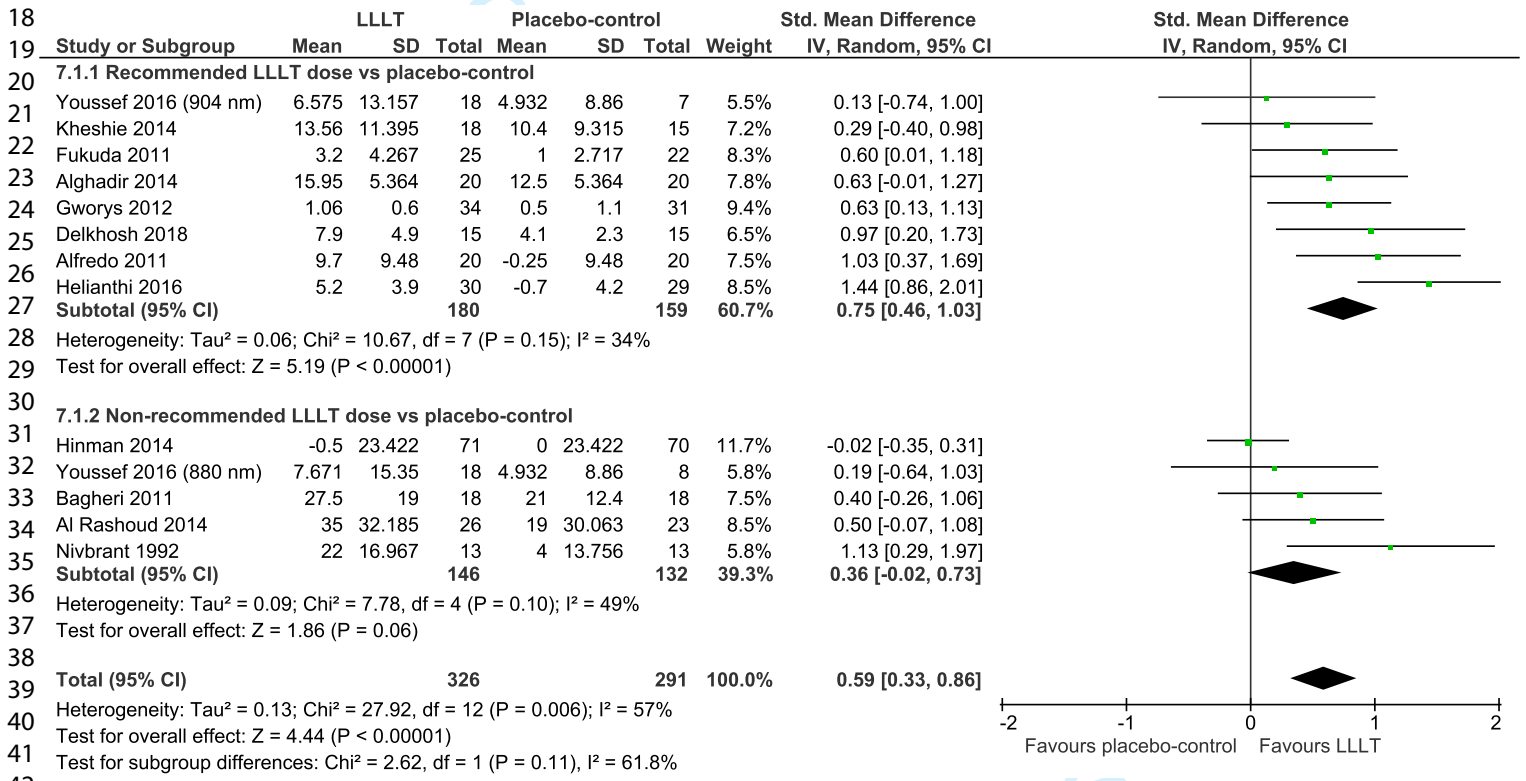

1  
2  
3  
4  
5  
6  
7  
8  
9  
10  
11  
12  
13  
14  
15  
16  
17  
18  
19  
20  
21  
22  
23  
24  
25  
26  
27  
28  
29  
30  
31  
32  
33  
34  
35  
36  
37  
38  
39  
40  
41  
42  
43  
44  
45  
46  
47  
48  
49  
50  
51  
52  
53  
54  
55  
56  
57  
58  
59  
60

FOR

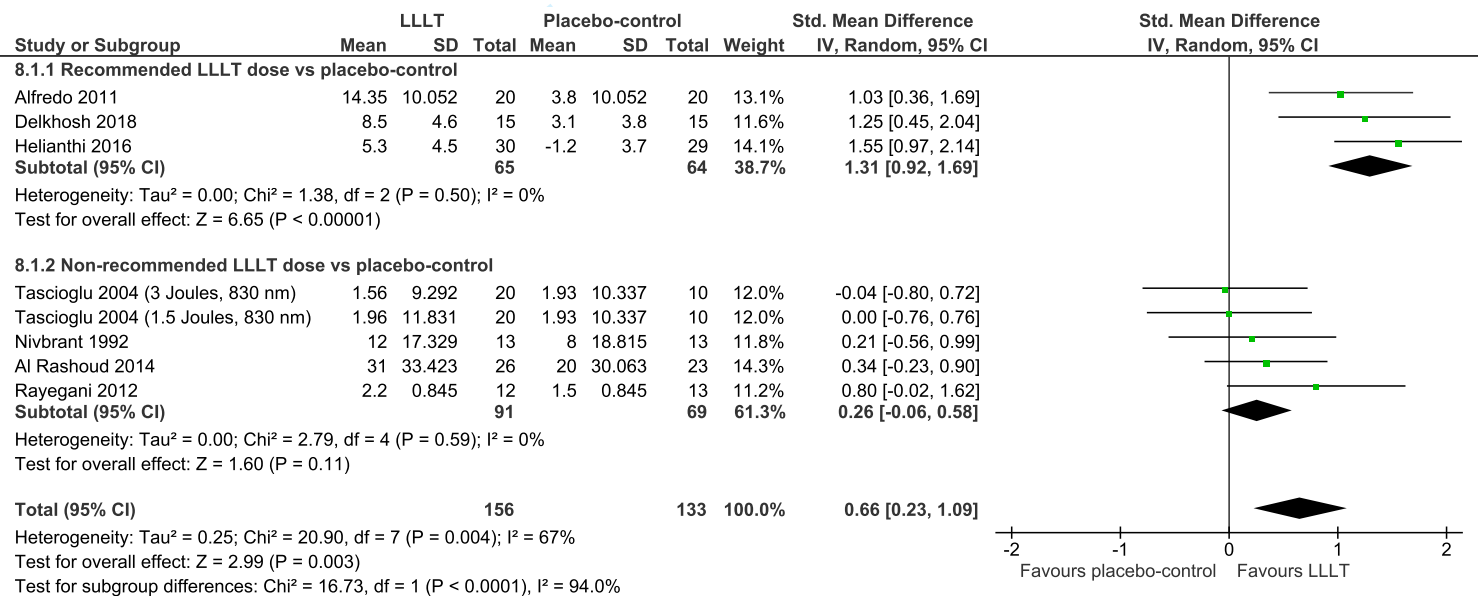

1111

1  
2  
3  
4  
5  
6  
7  
8  
9  
10  
11  
12  
13  
14  
15  
16  
17  
18  
19  
20  
21  
22  
23  
24  
25  
26  
27  
28  
29  
30  
31  
32  
33  
34  
35  
36  
37  
38  
39  
40  
41  
42  
43  
44  
45  
46  
47  
48  
49  
50  
51  
52  
53  
54  
55  
56  
57  
58  
59  
60

|                   | Random sequence generation (selection bias) | Allocation concealment (selection bias) | Blinding (performance bias and detection bias) | Blinding of outcome assessment (detection bias) | Incomplete outcome data (attrition bias) | Selective reporting (reporting bias) |
|-------------------|---------------------------------------------|-----------------------------------------|------------------------------------------------|-------------------------------------------------|------------------------------------------|--------------------------------------|
| Jensen 1987       | ?                                           | ?                                       | ?                                              | +                                               | +                                        | +                                    |
| Hinman 2014       | +                                           | +                                       | +                                              | +                                               | +                                        | +                                    |
| Tascioglu 2004    | +                                           | ?                                       | +                                              | +                                               | +                                        | +                                    |
| Bülow 1994        | ?                                           | ?                                       | +                                              | +                                               | +                                        | +                                    |
| Gworys 2012       | ?                                           | ?                                       | ?                                              | +                                               | +                                        | +                                    |
| Gur and Oktayoglu | +                                           | ?                                       | +                                              | +                                               | +                                        | +                                    |
| Youssef 2016      | +                                           | +                                       | ?                                              | +                                               | +                                        | +                                    |
| Fukuda 2011       | +                                           | +                                       | +                                              | +                                               | +                                        | +                                    |
| Rayegani 2012     | +                                           | ?                                       | +                                              | +                                               | ?                                        | +                                    |
| Kheshie 2014      | +                                           | +                                       | +                                              | +                                               | +                                        | +                                    |
| Bagheri 2011      | ?                                           | ?                                       | +                                              | +                                               | +                                        | +                                    |
| Alfredo 2011      | +                                           | +                                       | +                                              | +                                               | +                                        | +                                    |
| Alghadir 2014     | +                                           | +                                       | +                                              | +                                               | +                                        | +                                    |
| Al Rashoud 2014   | +                                           | +                                       | +                                              | +                                               | +                                        | +                                    |
| Gur 2003          | +                                           | ?                                       | +                                              | +                                               | +                                        | +                                    |
| Delkhosh 2018     | +                                           | ?                                       | +                                              | +                                               | ?                                        | +                                    |
| Nivbrant 1992     | +                                           | ?                                       | +                                              | +                                               | +                                        | +                                    |
| Koutenaei 2017    | +                                           | +                                       | +                                              | +                                               | ?                                        | +                                    |
| Hegedus 2009      | +                                           | +                                       | +                                              | +                                               | +                                        | +                                    |
| Mohammed 2018     | ?                                           | ?                                       | +                                              | +                                               | ?                                        | +                                    |
| Helianthi 2016    | +                                           | +                                       | ?                                              | +                                               | +                                        | +                                    |
| Nambi 2016        | +                                           | +                                       | +                                              | +                                               | +                                        | +                                    |

1  
2  
3  
4  
5  
6  
7  
8  
9  
10  
11  
12  
13  
14  
15  
16  
17  
18  
19  
20  
21  
22  
23  
24  
25  
26  
27  
28  
29  
30  
31  
32  
33  
34  
35  
36  
37  
38  
39  
40  
41  
42  
43  
44  
45  
46  
47  
48  
49  
50  
51  
52  
53  
54  
55  
56  
57  
58  
59  
60

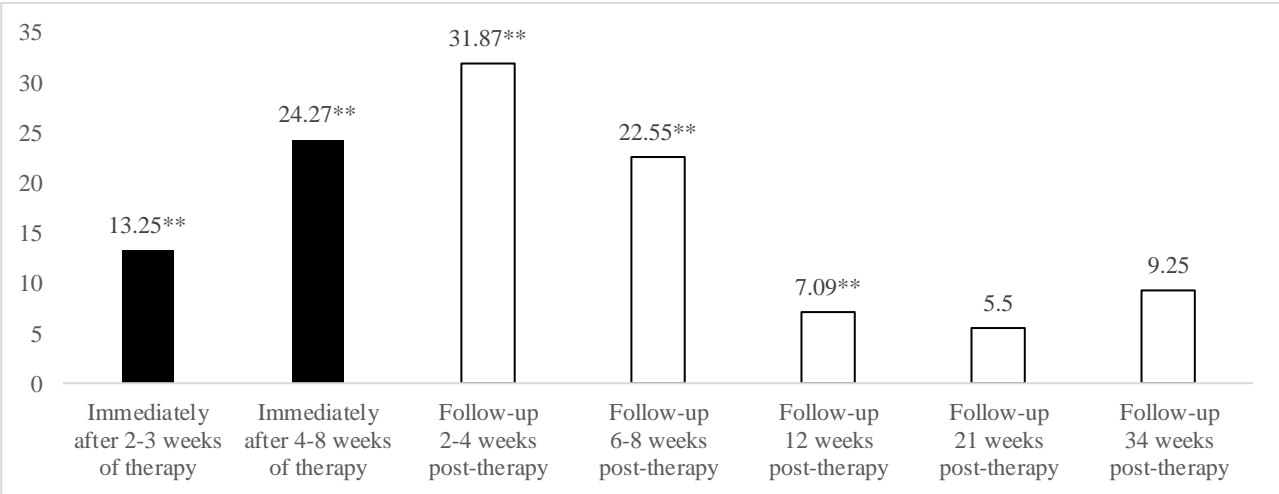

Or peer review only

1  
2  
3  
4  
5  
6  
7  
8  
9  
10  
11  
12  
13  
14  
15  
16  
17  
18  
19  
20  
21  
22

## Supplementary material for the article by Stausholm et al. entitled *Efficacy of low-level laser therapy on pain and disability in knee osteoarthritis: A systematic review and meta-analysis of randomized placebo-controlled trials*

### Table of content

|                                                                             |    |
|-----------------------------------------------------------------------------|----|
| PubMed database search string .....                                         | 1  |
| Excluded articles .....                                                     | 1  |
| Pain time-effect profile of LLLT .....                                      | 2  |
| Publication and small study bias assessment .....                           | 3  |
| Risk of bias impact analysis .....                                          | 5  |
| Support for risk of bias judgments and funding of the included trials ..... | 9  |
| LLLT with and without exercise therapy .....                                | 16 |
| Mean Difference vs Standardized Mean Difference .....                       | 17 |
| References .....                                                            | 19 |

### PubMed database search string

23  
24  
25  
26  
27  
28  
29  
30  
31  
32

The PubMed database search string was: ("Osteoarthritis, Knee"[Mesh] OR "Knee Joint"[Mesh] OR "Knee"[Mesh] OR "Osteoarthritis"[Mesh] OR Knee[Title/Abstract] OR Knees[Title/Abstract] OR Osteoarthr\*[Title/Abstract]) AND ("Low-Level Light Therapy"[Mesh] OR LLLT[Title/Abstract] OR "low level"[Title/Abstract] OR "low power"[Title/Abstract] OR laser therap\*[Title/Abstract] OR "laser acupuncture"[Title/Abstract] OR "narrow band"[Title/Abstract] OR "HeNe"[Title/Abstract] OR "632 nm"[Title/Abstract] OR "Ga-Al-As"[Title/Abstract] OR "820 nm"[Title/Abstract] OR "830 nm"[Title/Abstract] OR "850 nm"[Title/Abstract] OR "GaAs"[Title/Abstract] OR "904 nm"[Title/Abstract])

### Excluded articles

33  
34  
35  
36  
37  
38  
39  
40  
41  
42  
43  
44  
45  
46  
47  
48  
49  
50  
51  
52  
53  
54  
55  
56  
57  
58  
59  
60

Table 1 | Excluded articles initially judged potentially eligible

| First author                     | Reason for exclusion                             |
|----------------------------------|--------------------------------------------------|
| Alayat 2017 <sup>1</sup>         | HILT, not LLLT                                   |
| Ciechanowska 2008 <sup>2</sup>   | No placebo-control                               |
| Coelho <sup>3</sup>              | Only study protocol                              |
| de Matos 2018 <sup>4</sup>       | No placebo-control                               |
| de Meneses <sup>5</sup>          | Full-text not available (emailed)                |
| de Paula 2018 <sup>6</sup>       | NBLT + LLLT vs sham LLLT alone                   |
| Giavelli 1998 <sup>7</sup>       | No placebo-control                               |
| Götte 1995 <sup>8</sup>          | No outcome data reported                         |
| Kujawa 2004 <sup>9</sup>         | No placebo-control                               |
| Leal-Junior 2014 <sup>10</sup>   | Non-specific knee pain                           |
| Lepilina 1990 <sup>11</sup>      | No placebo-control                               |
| Marquina 2012 <sup>12</sup>      | Non-specific knee pain                           |
| Montes-Molina 2009 <sup>13</sup> | No placebo-control                               |
| Nakamura 2014 <sup>14</sup>      | No placebo-control                               |
| Paolillo 2018 <sup>15</sup>      | No placebo-control                               |
| Pinfildi <sup>16</sup>           | Full-text not available (emailed)                |
| Ren 2010 <sup>17</sup>           | No placebo-control                               |
| Shen 2009 <sup>18</sup>          | LLLT + moxibustion vs sham LLLT alone            |
| Soleimanpour 2014 <sup>19</sup>  | No placebo-control                               |
| Stelian 1992 <sup>20</sup>       | NBLT, not laser                                  |
| Trelles 1991 <sup>21</sup>       | No placebo-control                               |
| Wang 2013 <sup>22</sup>          | No randomization                                 |
| Yavuz 2013 <sup>23</sup>         | No placebo-control                               |
| Yurtkuran 2006 <sup>24</sup>     | Irradiated acupoint spleen 9, not the knee joint |
| Yuvarani 2018 <sup>25</sup>      | No placebo-control                               |
| Zhao 2010 <sup>26</sup>          | No placebo-control                               |
| Zou 2017 <sup>27</sup>           | No placebo-control                               |

NBLT = narrow-band light therapy; LLLT = low-level laser therapy; HILT = high intensity laser therapy.



## Pain time-effect profile of LLLT

Analyses were performed to estimate the pain time-effect profile of the recommended LLLT doses by imputing the results of the trials with these doses in subgroups with narrower time intervals (figure 1).

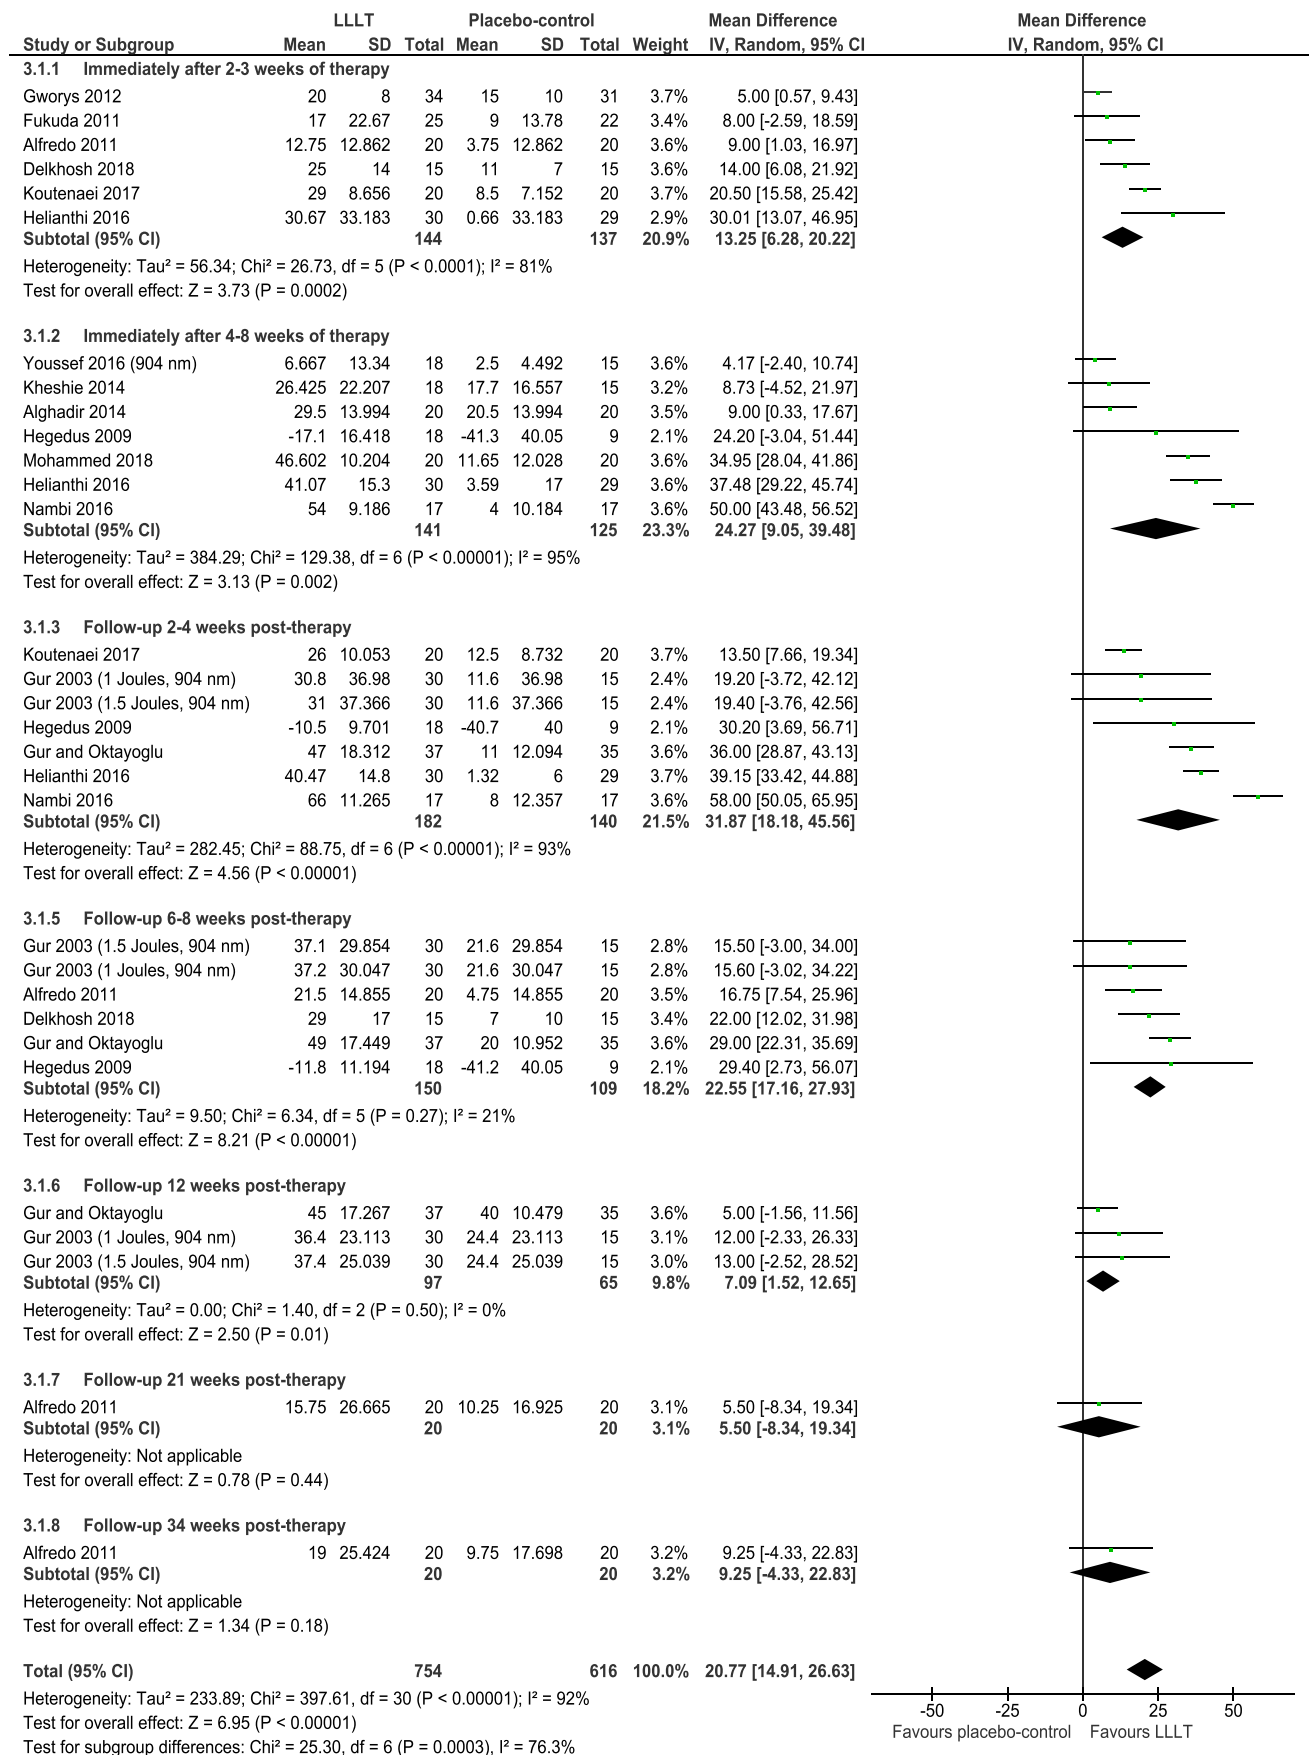

Figure 1 | Pain time-effect profile (recommended LLLT doses vs placebo-control)

**Publication and small study bias assessment**

Funnel plots were performed using the results from the main analyses (immediately after the end of therapy, primarily). There were no clear indications of publication bias (figure 2-3). Moreover, a subsequent change from random to fixed effects models only caused a slight change in point effect estimates: Pain results from 13.22 to 14.14 mm VAS (figure 4-5) and disability from 0.57 to 0.48 (SMD) (figure 6-7).



Figure 2 | Funnel plot (pain)



Figure 3 | Funnel plot (disability)



Figure 4 | Random effects model (pain)



Figure 5 | Fixed effects model (pain)

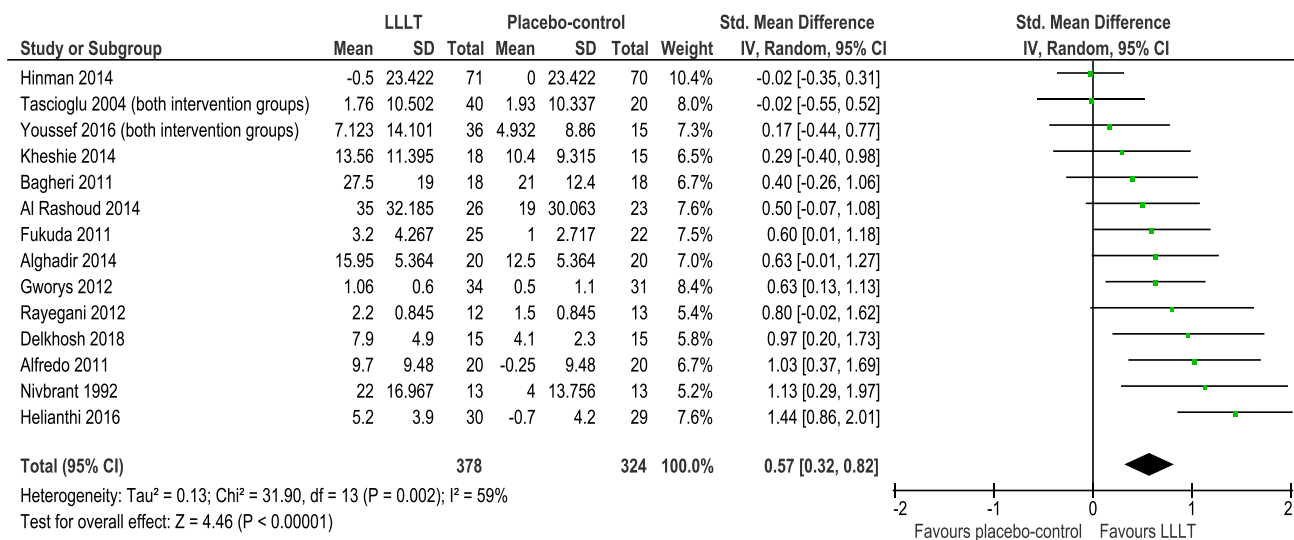

Figure 6 | Random effects model (disability)

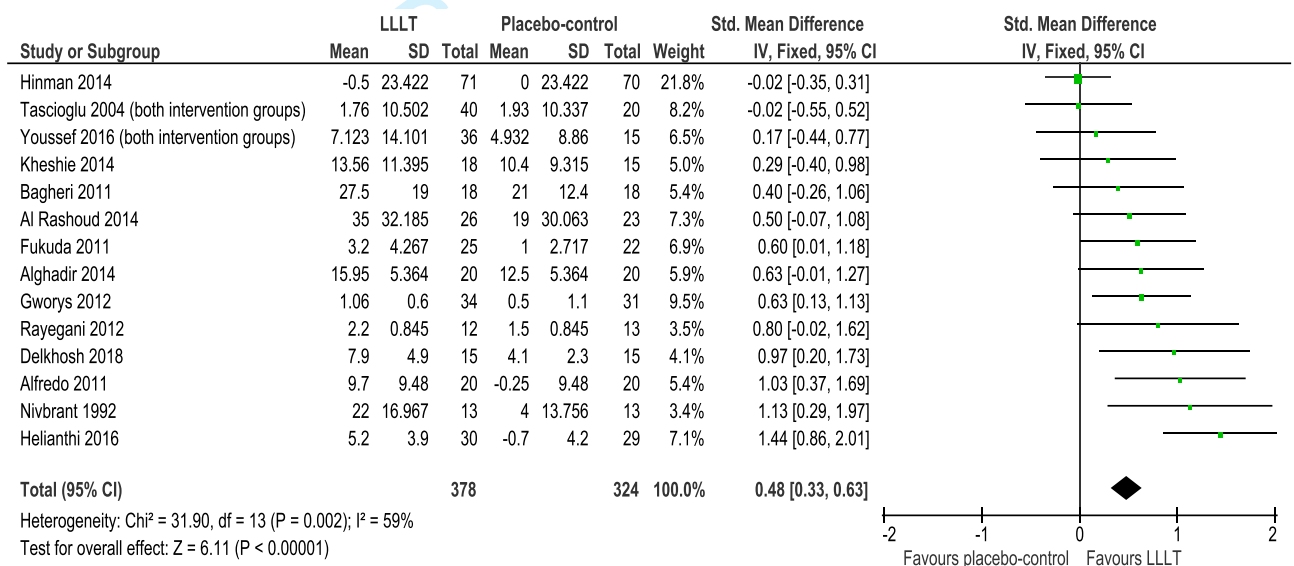

Figure 7 | Fixed effects model (disability)

**Risk of bias impact analysis**

Risk of bias impact analyses were performed using the results from the main analyses (immediately after the end of therapy, primarily). The mean statistical heterogeneity of the subgroup analyses were similar to the overall levels (figure 8-15).

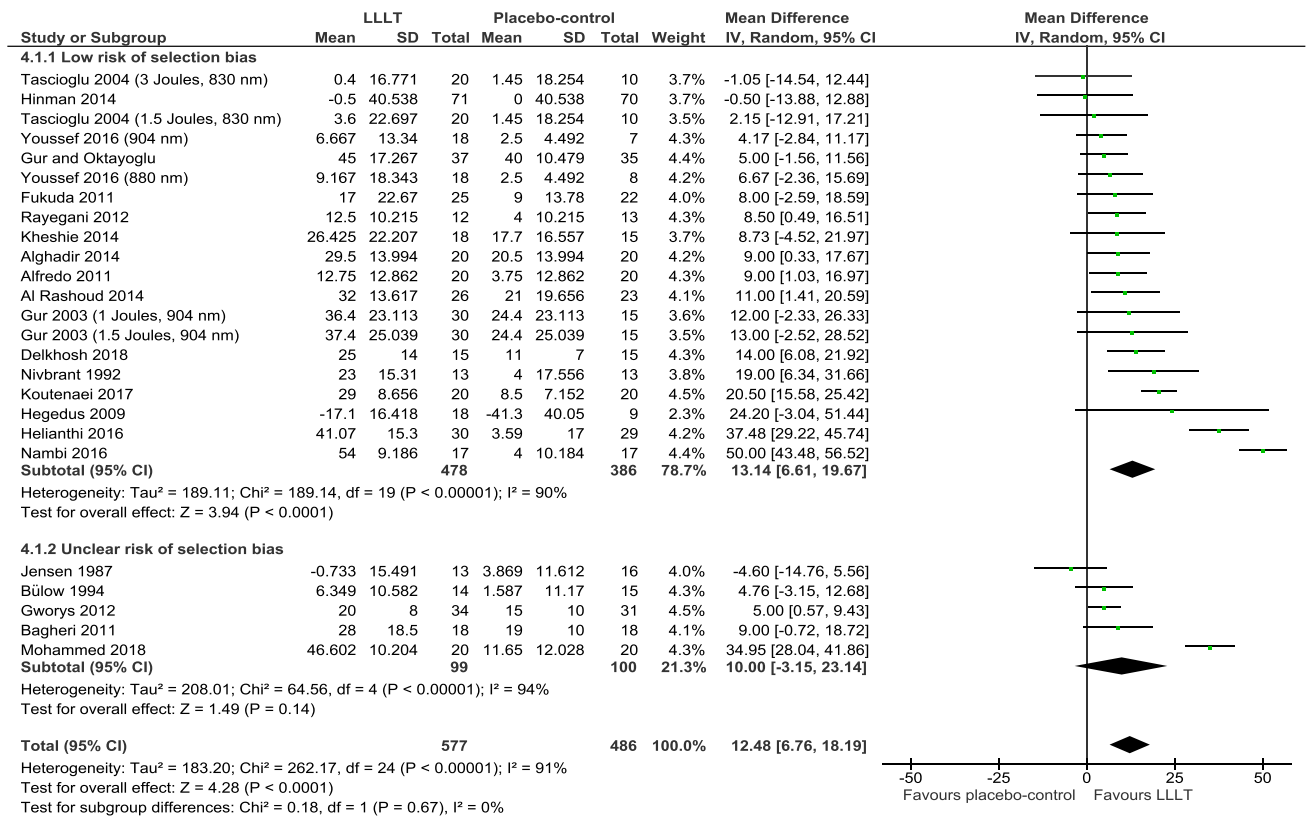

Figure 8 | Pain results - risk of selection bias (random sequence generation)

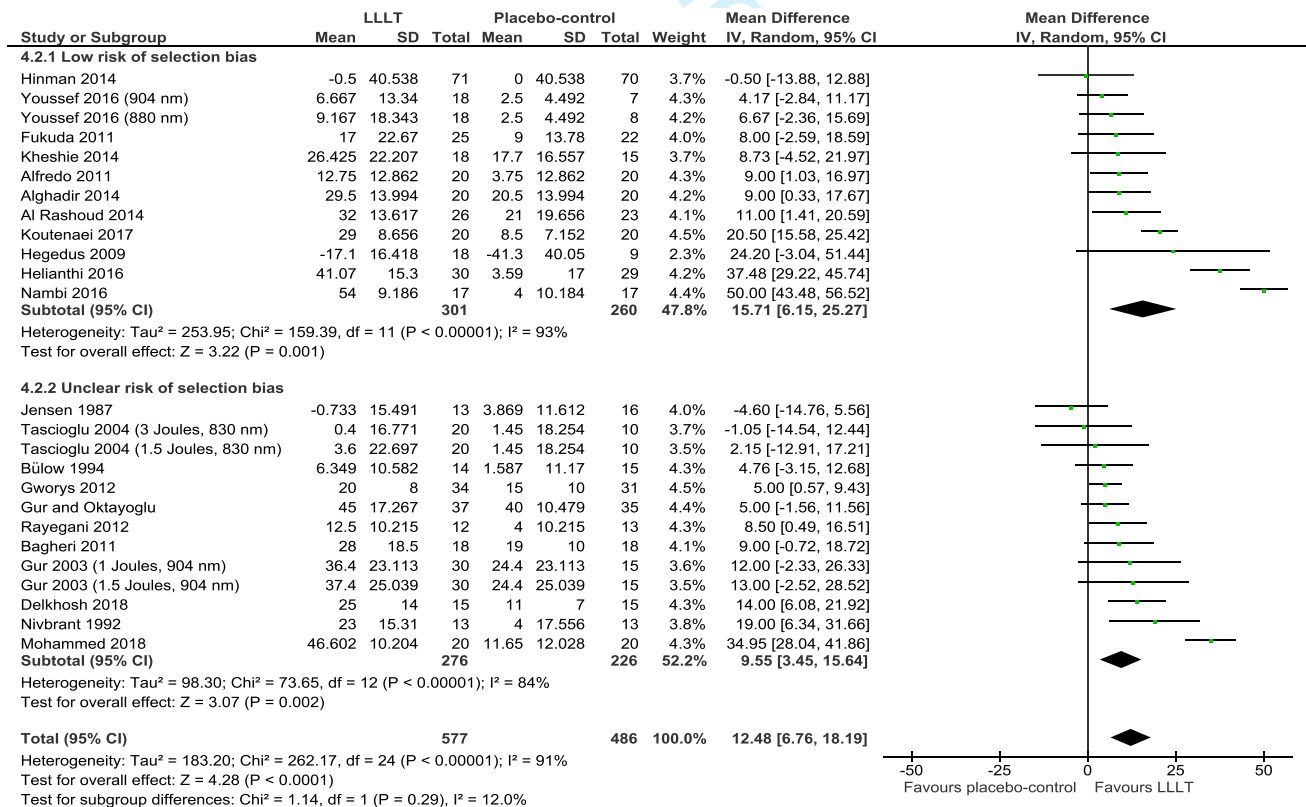

Figure 9 | Pain results - risk of selection bias (allocation concealment)

1  
2  
3  
4  
5  
6  
7  
8  
9  
10  
11  
12  
13  
14  
15  
16  
17  
18  
19  
20  
21  
22  
23  
24  
25  
26  
27  
28  
29  
30  
31  
32  
33  
34  
35  
36  
37  
38  
39  
40  
41  
42  
43  
44  
45  
46  
47  
48  
49  
50  
51  
52  
53  
54  
55  
56  
57  
58  
59  
60

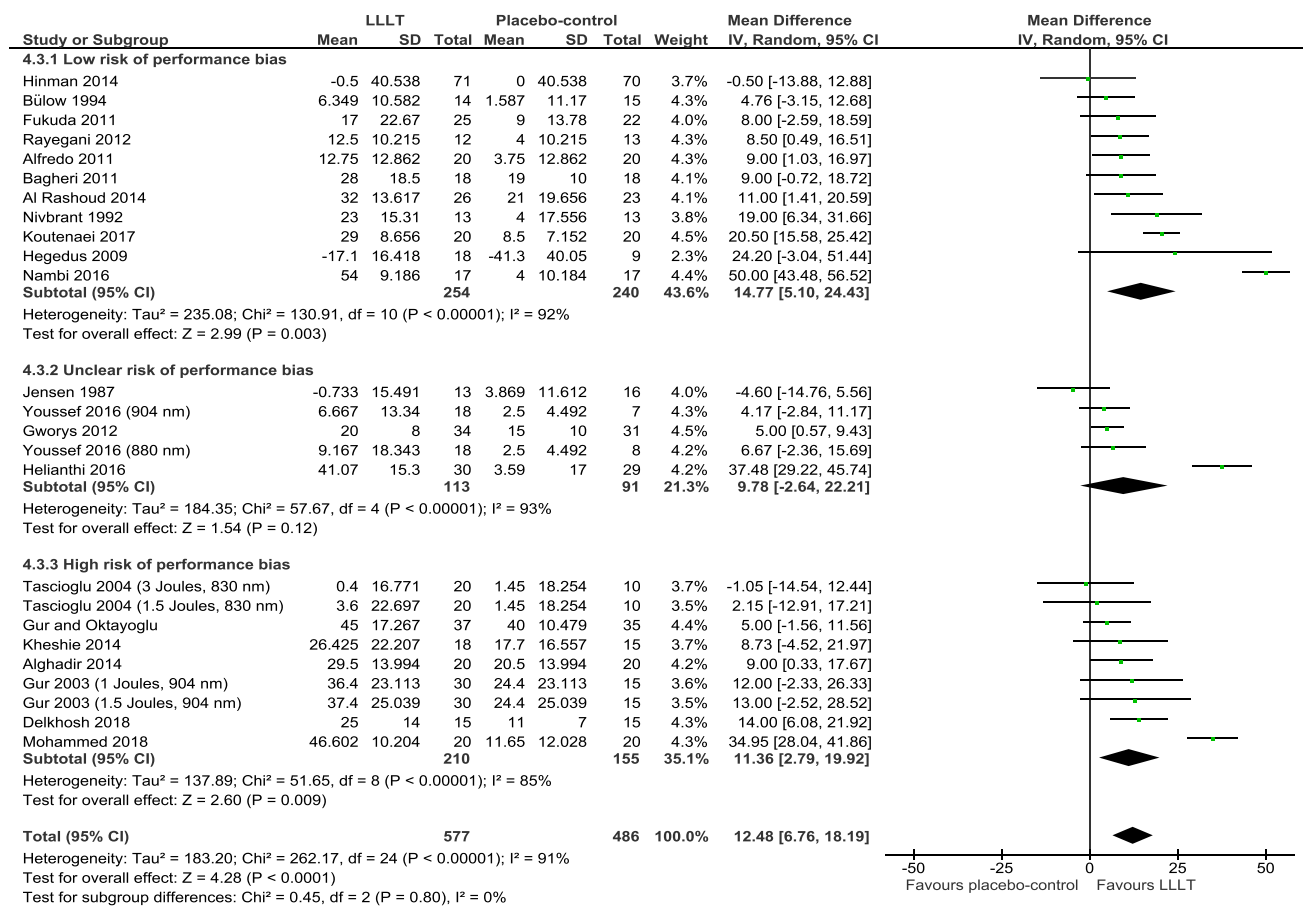

Figure 10 | Pain results - risk of performance bias (blinding of therapist)

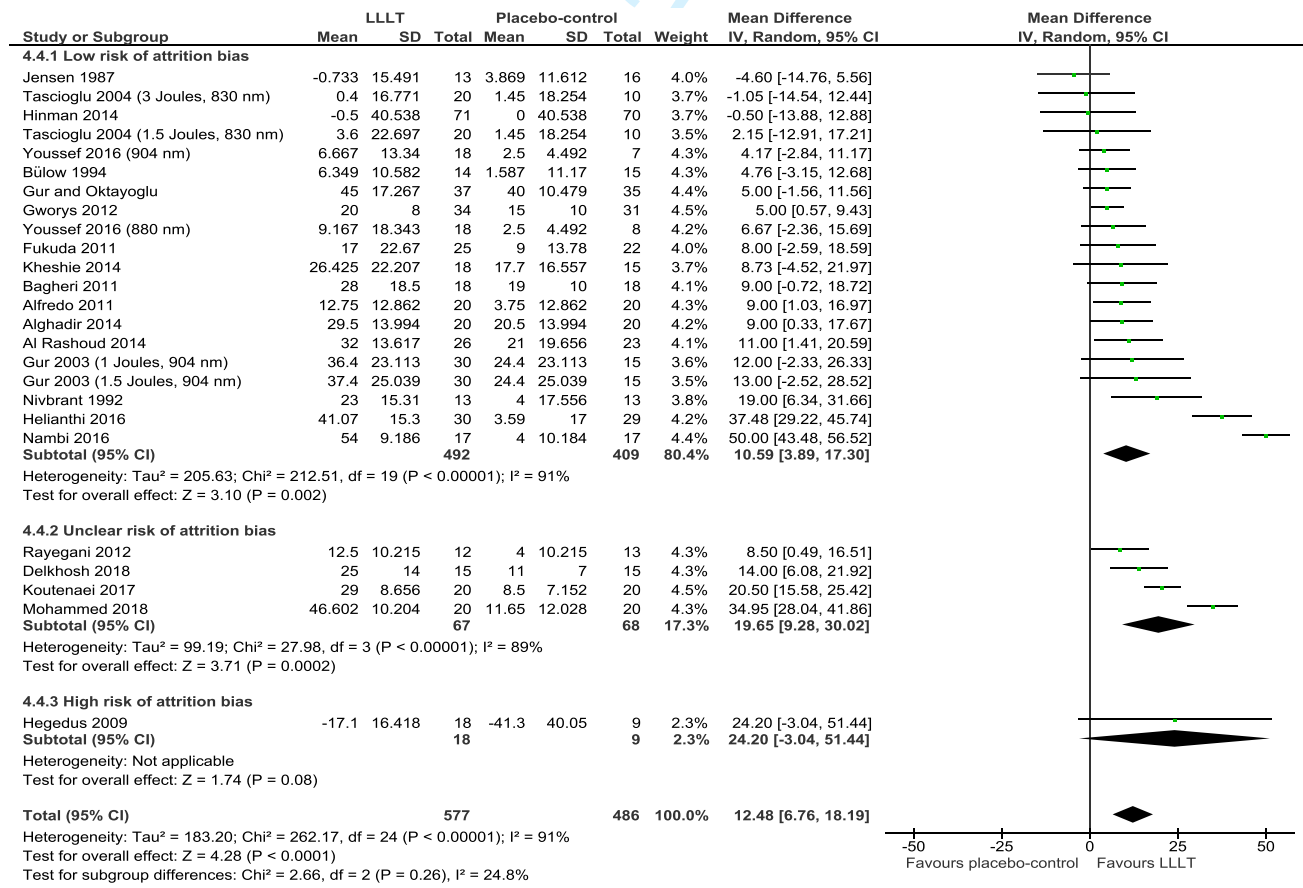

Figure 11 | Pain results - risk of attrition bias (incomplete outcome data)



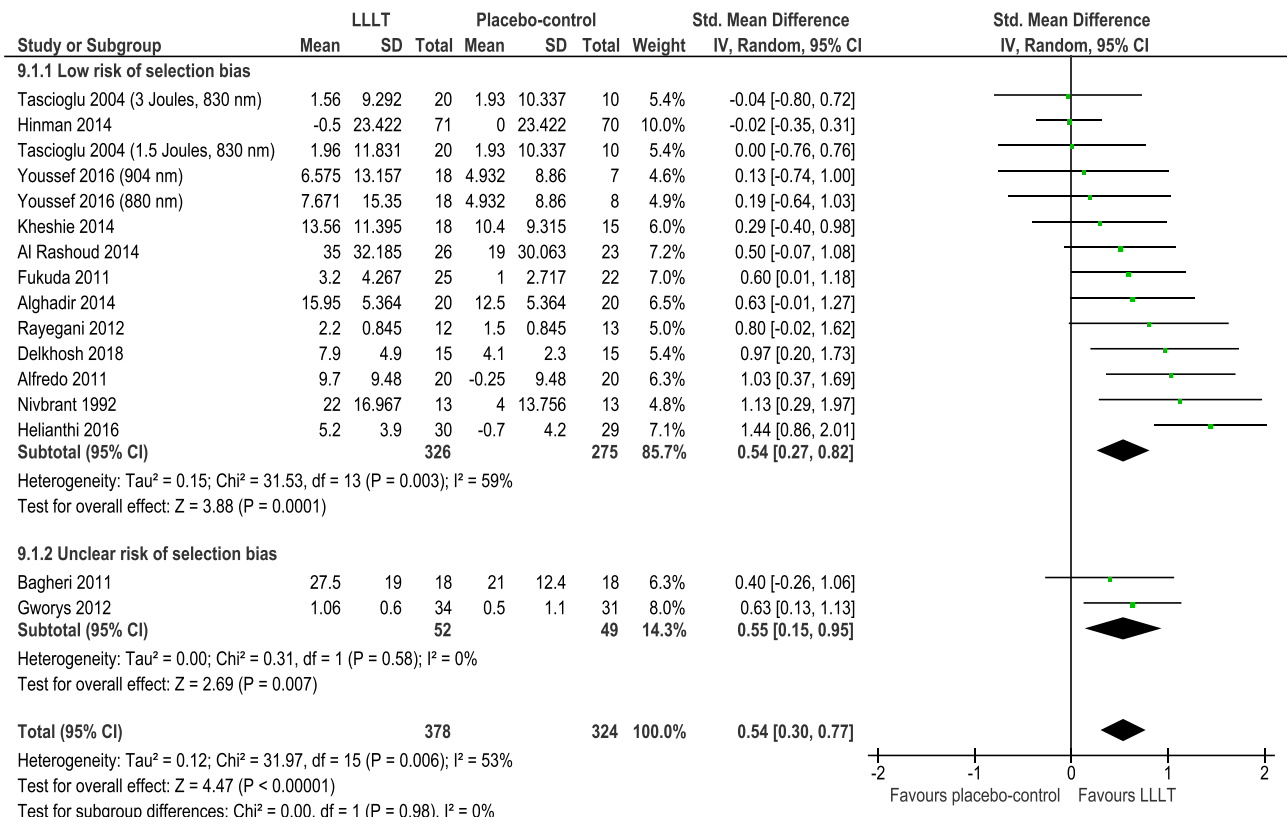

Figure 12 | Disability results - risk of selection bias (random sequence generation)

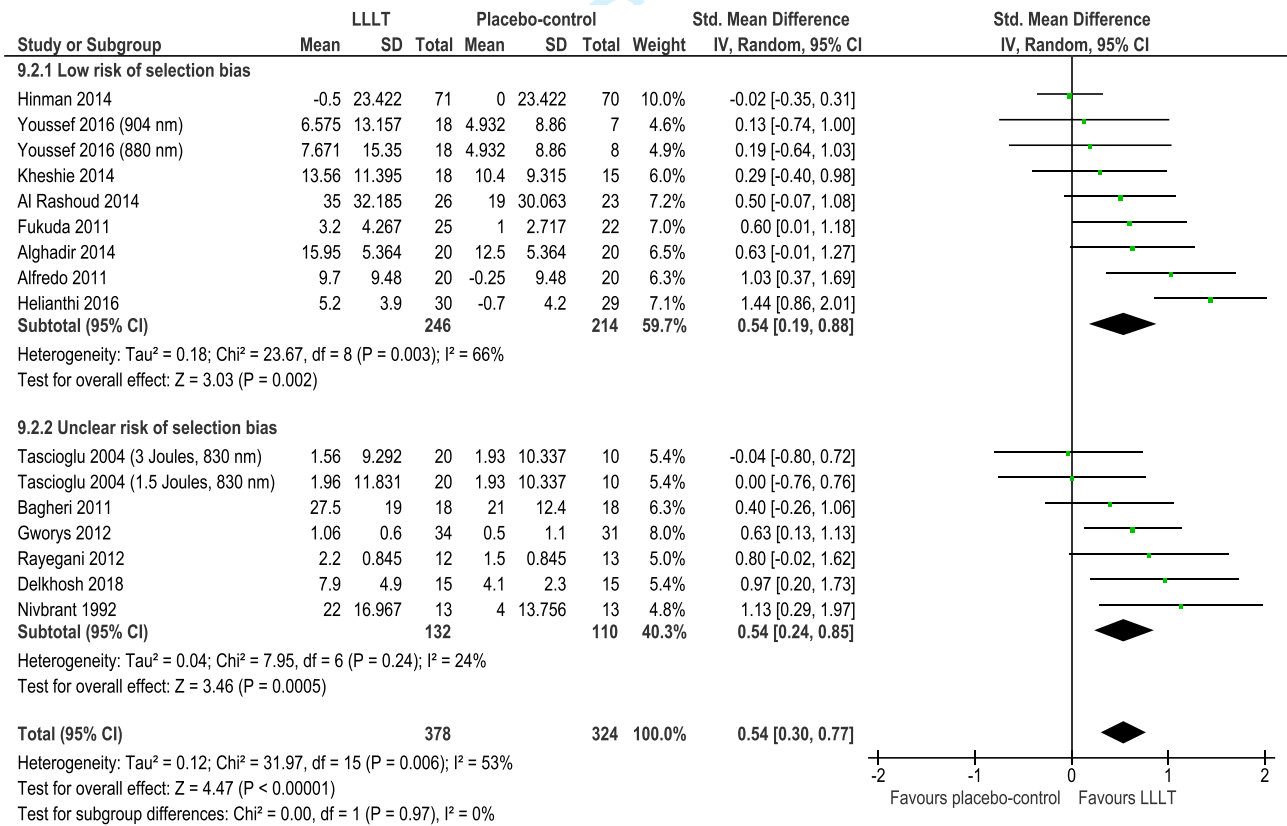

Figure 13 | Disability results - risk of selection bias (allocation concealment)



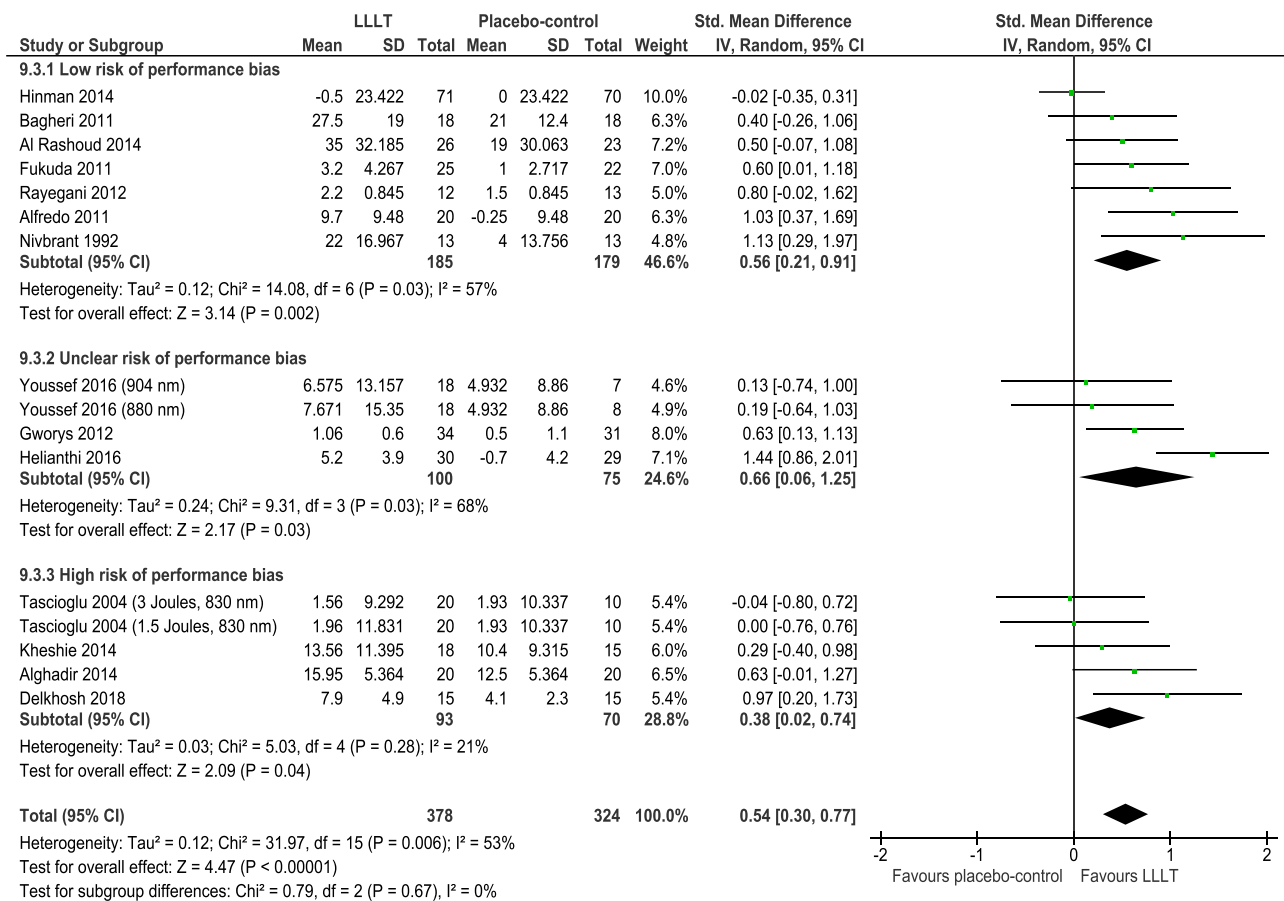

Figure 14 | Disability results - risk of performance bias (blinding of therapist)

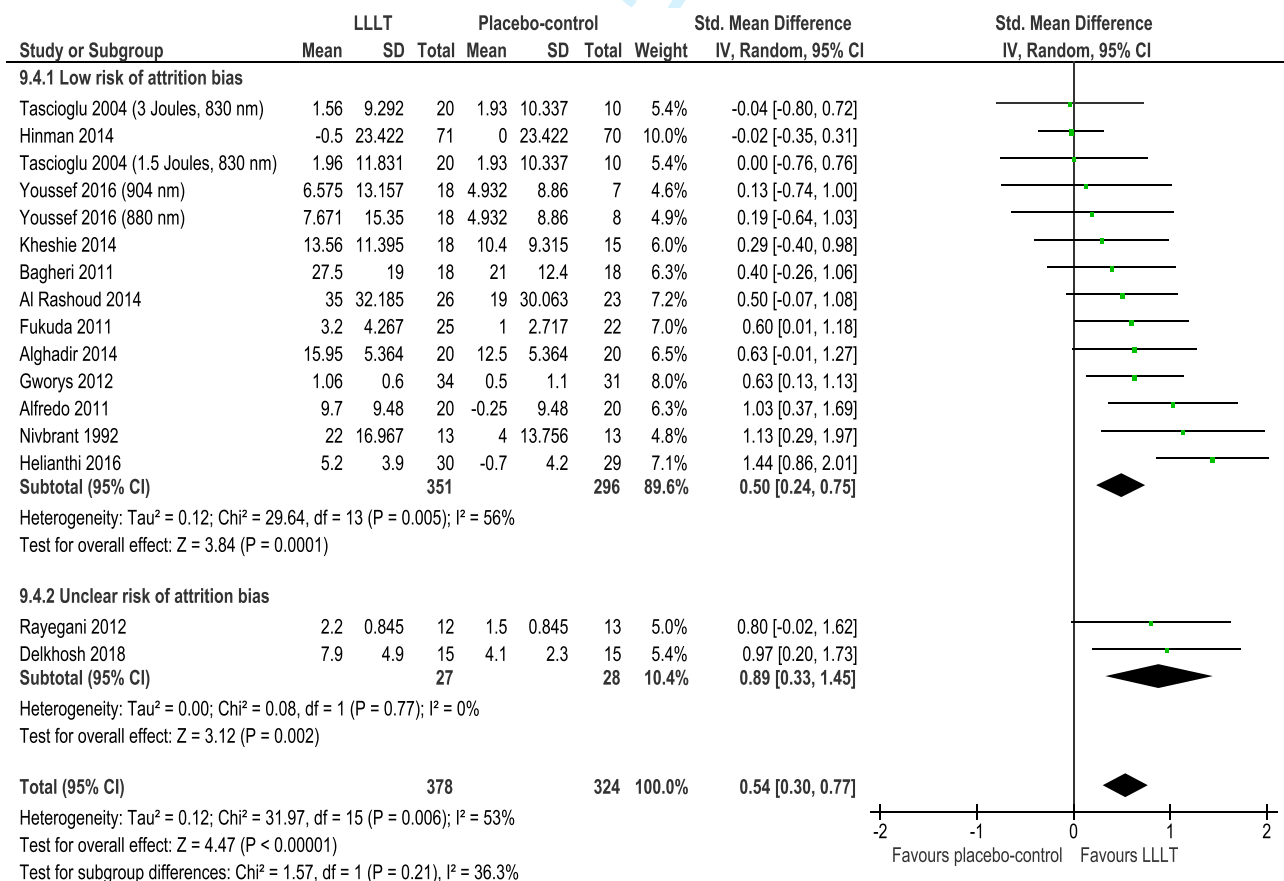

Figure 15 | Disability results - risk of attrition bias (incomplete outcome data)

## Support for risk of bias judgments and funding of the included trials

### Al Rashoud et al. 2014

| Type of bias                           | Judgment | Support for judgment                                                                                                                                                                                                                                                                                    |
|----------------------------------------|----------|---------------------------------------------------------------------------------------------------------------------------------------------------------------------------------------------------------------------------------------------------------------------------------------------------------|
| Random sequence generation             | Low risk | Quote: "... a randomization list was produced using software-generated randomised numbers to the randomisation depended on random blocks of 10."<br>Our comment: Probably done.                                                                                                                         |
| Allocation concealment                 | Low risk | Our comment: Investigators are unable to predict the allocation made by a computer-based randomization program.                                                                                                                                                                                         |
| Blinding of participants and personnel | Low risk | Quote: "Neither investigator nor the patient knew whether a placebo or active treatment was being administered to only the research assistant had the identifying code to determine which treatment was given."<br>Our comment: Probably true. The experimental group was treated with invisible laser. |
| Blinding of assessor                   | Low risk | Our comment: All outcomes of interest are self-reported (participant-assessed) and the participants were probably blinded.                                                                                                                                                                              |
| Incomplete data                        | Low risk | Quote: "Forty-nine patients with knee osteoarthritis were assigned at random into two groups: Active laser group (n = 26) and placebo laser group (n = 23)", "... 49 completed the study ...".<br>Our comment: Probably true.                                                                           |
| Selective reporting                    | Low risk | Our comment: Reported in adherence to a protocol (International Standard Randomised Controlled Trials Number: ISRCTN24010862).                                                                                                                                                                          |

**Funding - quote:** "The project was funded by general administration for medical services of Ministry of Interior, Security Forces Hospital; Riyadh, Saudi Arabia."

### Alfredo et al. 2011

| Type of bias                           | Judgment | Support for judgment                                                                                                                                                                                                                                                                                                                                                     |
|----------------------------------------|----------|--------------------------------------------------------------------------------------------------------------------------------------------------------------------------------------------------------------------------------------------------------------------------------------------------------------------------------------------------------------------------|
| Random sequence generation             | Low risk | Quote: "Randomization was performed by using sealed, randomly filled envelopes describing the treatment group. Patients and the physiotherapist responsible for the evaluation were unaware of randomization results".<br>Our comment: Probably done. It seems unlikely that the investigators could easily predict the group allocation due to the sequence generation. |
| Allocation concealment                 | Low risk | Quote: "Patients and the physiotherapist responsible for the randomization were unaware of the randomization results".<br>Our comment: Probably true.                                                                                                                                                                                                                    |
| Blinding of participants and personnel | Low risk | Quote: "All patients were treated by the same physiotherapist who had not taken part in the evaluations".<br>"The laser equipment had two identical pens, one for the active treatment and one for the placebo treatment (sealed)".<br>Our comment: Probably done. The experimental group was treated with invisible laser.                                              |
| Blinding of assessor                   | Low risk | Quote: "All participants were evaluated by the same blinded physiotherapist"<br>Our comment: All outcomes of interest are self-reported (participant-assessed) and the participants were probably blinded.                                                                                                                                                               |
| Incomplete data                        | Low risk | Our comment: 13% of the included participants were not evaluated. This number is unlikely to introduce a relevant bias.                                                                                                                                                                                                                                                  |
| Selective reporting                    | Low risk | Reported in adherence to a protocol (Clinical Trials number: CT01306435).                                                                                                                                                                                                                                                                                                |

**Funding - quote:** "This study was supported financially by: Fundação de Amparo à Pesquisa do Estado de São Paulo (FAPESP) – Foundation of Research Support of São Paulo State and Coordenação de Aperfeiçoamento de Pessoal de Nível Superior (CAPES) – Coordination for the Improvement of Higher Level – or Education – Personnel. Biostatistics Support Group, Department of Dentistic, School of Odontology, University of São Paulo, São Paulo, Brazil."

### Alghadir et al. 2013

| Type of bias                           | Judgment  | Support for judgment                                                                                                                                                                                                                                                                       |
|----------------------------------------|-----------|--------------------------------------------------------------------------------------------------------------------------------------------------------------------------------------------------------------------------------------------------------------------------------------------|
| Random sequence generation             | Low risk  | Quote: "Randomization was performed using sealed, randomly filled envelopes".<br>Our comment: Probably done.                                                                                                                                                                               |
| Allocation concealment                 | Low risk  | Our comment: It seems unlikely that the investigators could easily predict the group allocation due to the sequence generation.                                                                                                                                                            |
| Blinding of participants and personnel | High risk | Quote: "The treatment parameters were identical, but without switching on the machine".<br>Our comment: Probably done. The study is described as single-blinded. The experimental group was treated with invisible laser. The physiotherapists treating the participants were not blinded. |
| Blinding of assessor                   | Low risk  | Our comment: All outcomes of interest are self-reported (participant-assessed) and the participants were probably blinded.                                                                                                                                                                 |
| Incomplete data                        | Low risk  | Quote: "(...) all of them completed the study period."<br>Our comment: Probably true.                                                                                                                                                                                                      |
| Selective reporting                    | Low risk  | Our comment: Reported as stated in the protocol.                                                                                                                                                                                                                                           |

**Funding - quote:** "The authors extend their appreciation to the Deanship of Scientific Research at King Saud University for funding the work through the research group project NO RGP-VPP-209."

**Bagheri et al. 2010**

| Type of bias                           | Judgment     | Support for judgment                                                                                                                                                                                                                           |
|----------------------------------------|--------------|------------------------------------------------------------------------------------------------------------------------------------------------------------------------------------------------------------------------------------------------|
| Random sequence generation             | Unclear risk | Quote (translated from Farsi): <i>"The random distribution of people was done in such a way that the number of male and female patients is the same in both groups"</i> .<br>Our comment: Not enough information to make a qualified judgment. |
| Allocation concealment                 | Unclear risk | Our comment: Not enough information to make a qualified judgment.                                                                                                                                                                              |
| Blinding of participants and personnel | Low risk     | Quote (translated from Farsi): <i>"The presence of active or inactive lasers was not known"</i> .<br>Our comment: Probably true. The experimental group was treated with invisible laser.                                                      |
| Blinding of assessor                   | Low risk     | Our comment: All outcomes of interest are self-reported (participant-assessed) and the participants were probably blinded. The experimental group was treated with invisible laser.                                                            |
| Incomplete data                        | Low risk     | Our comment: 10% of the participants were not evaluated. This number is unlikely to introduce a relevant bias.                                                                                                                                 |
| Selective reporting                    | Low risk     | Our comment: No outcome of interest described in the method section is missing from the result section.                                                                                                                                        |

**Funding** - Sponsored by the Semnan University of Science.

**Bülow et al. 1994**

| Type of bias                           | Judgment     | Support for judgment                                                                                                                                                                                                                                                                         |
|----------------------------------------|--------------|----------------------------------------------------------------------------------------------------------------------------------------------------------------------------------------------------------------------------------------------------------------------------------------------|
| Random sequence generation             | Unclear risk | Our comment: The authors state that the study is randomized, but there is no description of the randomization method.                                                                                                                                                                        |
| Allocation concealment                 | Unclear risk | Our comment: Not enough information to make a qualified judgment.                                                                                                                                                                                                                            |
| Blinding of participants and personnel | Low risk     | Quote: <i>"The nurse in charge of the randomization key selected the laser or placebo-laser before each treatment"</i> and <i>"The blinded settings for patient and physician were maintained"</i> .<br>Our comment: Probably done. The experimental group was treated with invisible laser. |
| Blinding of assessor                   | Low risk     | Our comment: All outcomes of interest are self-reported (participant-assessed) and the participants were probably blinded.                                                                                                                                                                   |
| Incomplete data                        | Low risk     | Our comment: No dropouts.                                                                                                                                                                                                                                                                    |
| Selective reporting                    | Low risk     | Our comment: No outcomes of interest described in the method section is missing in the result section.                                                                                                                                                                                       |

**Funding - quote:** *"The study was sponsored by Henny and Helge Holgersen's Foundation and the Bodil Petersen Foundation."*

**Delkhosh et al. 2018**

| Type of bias                           | Judgment     | Support for judgment                                                                                                                                                                                                                                                                                                                                                                                                 |
|----------------------------------------|--------------|----------------------------------------------------------------------------------------------------------------------------------------------------------------------------------------------------------------------------------------------------------------------------------------------------------------------------------------------------------------------------------------------------------------------|
| Random sequence generation             | Low risk     | Quote: <i>"... volunteers are randomly allocated to three groups by lottery."</i> .<br>Our comment: Probably done.                                                                                                                                                                                                                                                                                                   |
| Allocation concealment                 | Unclear risk | Our comment: Not enough information to make a qualified judgment.                                                                                                                                                                                                                                                                                                                                                    |
| Blinding of participants and personnel | High risk    | Quotes: <i>"The patients were randomly assigned to three groups: 1-standard treatment with placebo laser..."</i> and <i>"Not blinded"</i> .<br>Our comment: The investigators claimed the trial was placebo-controlled which is probably true as the participants were treated with invisible laser. Therefore, it seems likely that the investigators statement regarding lack of blinding refers to the therapist. |
| Blinding of assessor                   | Low risk     | Our comment: All outcomes of interest are self-reported (participant-assessed) and the participants were probably blinded.                                                                                                                                                                                                                                                                                           |
| Incomplete data                        | Unclear risk | Our comment: Not enough information to make a qualified judgment.                                                                                                                                                                                                                                                                                                                                                    |
| Selective reporting                    | Low risk     | Our comment: Reported in adherence to a protocol (Iranian Registry of Clinical Trials number: IRCT201502224549N8).                                                                                                                                                                                                                                                                                                   |

**Funding - quote:** *"Vice chancellor for research, Semnan University of Medical Sciences."*

## Fukuda et al. 2011

| Type of bias                           | Judgment | Support for judgment                                                                                                                                                                                                                                                                                                             |
|----------------------------------------|----------|----------------------------------------------------------------------------------------------------------------------------------------------------------------------------------------------------------------------------------------------------------------------------------------------------------------------------------|
| Random sequence generation             | Low risk | Quote: "This distribution was made by a secretary who was not involved in the treatment or evaluation, through a draw of sealed opaque envelopes. The envelopes were taken directly to the therapist without the patient having access to the result."<br>Our comment: Probably done.                                            |
| Allocation concealment                 | Low risk | Our comment: It seems unlikely that the investigators could easily predict the group allocation due to the sequence generation.                                                                                                                                                                                                  |
| Blinding of participants and personnel | Low risk | Quote: "(...) two identical pens, of which one was active (laser) and the other was sealed (placebo). These were labelled A and B by the project secretary, and only this person knew the true identification of the pens."<br>Our comment to the quote: Probably done. The experimental group was treated with invisible laser. |
| Blinding of assessor                   | Low risk | Our comment: All outcomes of interest are self-reported (participant-assessed) and the participants were probably blinded.                                                                                                                                                                                                       |
| Incomplete data                        | Low risk | Our comment: No dropouts.                                                                                                                                                                                                                                                                                                        |
| Selective reporting                    | Low risk | Our comment: No outcome of interest described in the method section is missing from the result section.                                                                                                                                                                                                                          |

**Funding:** Physical Therapy Sector, Irmandade da Santa Casa de Misericórdia de São Paulo (ISCMSP), São Paulo, São Paulo, Brazil.

## Gur &amp; Oktayoglu

| Type of bias                           | Judgment     | Support for judgment                                                                                                                                                                                                                                                                                                                                                                                      |
|----------------------------------------|--------------|-----------------------------------------------------------------------------------------------------------------------------------------------------------------------------------------------------------------------------------------------------------------------------------------------------------------------------------------------------------------------------------------------------------|
| Random sequence generation             | Low risk     | Quote: "Patients were randomly assigned to three treatment groups by one of the non-treating authors by drawing 1 of 120 envelopes."<br>Our comment: Probably done.                                                                                                                                                                                                                                       |
| Allocation concealment                 | Unclear risk | Our comment: It is unclear whether envelopes were sequentially numbered, opaque, and sealed.                                                                                                                                                                                                                                                                                                              |
| Blinding of participants and personnel | High risk    | Quote: "The study was conducted in a double-blind fashion. Subjects and physician were unaware of the code for active or placebo laser until the data analysis was completed but therapist was aware of the code for active or placebo laser."<br>Our comment: Probably true. The experimental group was treated with invisible laser. The participants were probably blinded, but the therapist was not. |
| Blinding of assessor                   | Low risk     | Our comment: All outcomes of interest are self-reported (participant-assessed) and the participants were probably blinded.                                                                                                                                                                                                                                                                                |
| Incomplete data                        | Low risk     | Our comment: 7.5% of the participants allocated to the laser group were not evaluated. 12.5% of the participants allocated to the control group were not evaluated. These numbers are unlikely to introduce a relevant bias. Reasons for dropout across groups are similar.                                                                                                                               |
| Selective reporting                    | Low risk     | Our comment: No outcome of interest described in the method section is missing from the result section.                                                                                                                                                                                                                                                                                                   |

**Funding:** Not stated.

## Gur et al. 2003

| Type of bias                           | Judgment     | Support for judgment                                                                                                                                                                                                                                                                                                                                                                                      |
|----------------------------------------|--------------|-----------------------------------------------------------------------------------------------------------------------------------------------------------------------------------------------------------------------------------------------------------------------------------------------------------------------------------------------------------------------------------------------------------|
| Random sequence generation             | Low risk     | Quote: "Patients were randomly assigned to three treatment groups by one of the non-treating authors by drawing of 1 of 90 envelopes."<br>Our comment: Probably done.                                                                                                                                                                                                                                     |
| Allocation concealment                 | Unclear risk | Our comment: It is unclear whether envelopes were sequentially numbered, opaque, and sealed.                                                                                                                                                                                                                                                                                                              |
| Blinding of participants and personnel | High risk    | Quote: "The study was conducted in a double-blind fashion. Subjects and physician were unaware of the code for active or placebo laser until the data analysis was completed but therapist was aware of the code for active or placebo laser."<br>Our comment: Probably true. The experimental group was treated with invisible laser. The participants were probably blinded, but the therapist was not. |
| Blinding of assessor                   | Low risk     | Our comment: All outcomes of interest are self-reported (participant-assessed) and the participants were probably blinded.                                                                                                                                                                                                                                                                                |
| Incomplete data                        | Low risk     | Our comment: No dropouts.                                                                                                                                                                                                                                                                                                                                                                                 |
| Selective reporting                    | Low risk     | Our comment: No outcome of interest described in the method section is missing from the result section.                                                                                                                                                                                                                                                                                                   |

**Funding:** Not stated.

**Gworys et al. 2012**

| Type of bias                           | Judgment     | Support for judgment                                                                                                                                                                                                                                                                                                     |
|----------------------------------------|--------------|--------------------------------------------------------------------------------------------------------------------------------------------------------------------------------------------------------------------------------------------------------------------------------------------------------------------------|
| Random sequence generation             | Unclear risk | Our comment: The authors state that the study is randomized, but there is no description of the randomization method.                                                                                                                                                                                                    |
| Allocation concealment                 | Unclear risk | Our comment: Not enough information to make a qualified judgment.                                                                                                                                                                                                                                                        |
| Blinding of participants and personnel | Unclear risk | Quote: "(...) a placebo group where laser therapy procedures were simulated without actual irradiation.". Our comment: Probably done. The experimental group was treated with invisible laser. The participants were probably blinded, but there is too little information to judge whether the therapists were blinded. |
| Blinding of assessor                   | Low risk     | Our comment: All outcomes of interest are self-reported (participant-assessed) and the participants were probably blinded.                                                                                                                                                                                               |
| Incomplete data                        | Low risk     | Quote: "laser the therapy sessions were performed once a day, 5 days a week over 2 weeks. Each patient attended 10 sessions.". Our comment: All participants probably attended to all 10 sessions. The outcomes were assessed immediately after the 10 sessions. Thus, there were probably no dropouts.                  |
| Selective reporting                    | Low risk     | Our comment: No outcome of interest described in the method section is missing from the result section.                                                                                                                                                                                                                  |

**Funding:** Not stated.

**Hegedus et al. 2009**

| Type of bias                           | Judgment  | Support for judgment                                                                                                                                                                                                                       |
|----------------------------------------|-----------|--------------------------------------------------------------------------------------------------------------------------------------------------------------------------------------------------------------------------------------------|
| Random sequence generation             | Low risk  | Quote: "Randomization was ensured by having patients randomly choose sealed envelopes from a bowl". Our comment: Probably done.                                                                                                            |
| Allocation concealment                 | Low risk  | Our comment: It seems unlikely that the investigators could easily predict the group allocation due to the sequence generation.                                                                                                            |
| Blinding of participants and personnel | Low risk  | Quote: "Neither the patients nor the operator knew which was the active or placebo LLLT probe.". Our comment: Probably true. The experimental group was treated with invisible laser.                                                      |
| Blinding of assessor                   | Low risk  | Quote: "Neither the patients nor the operator knew which was the active or placebo LLLT probe.". Our comment: Probably true. All outcomes of interest are self-reported (participant-assessed) and the participants were probably blinded. |
| Incomplete data                        | High risk | Our comment: 50% of the participants in the control group were not evaluated while 100% of the participants in the laser group were evaluated. These numbers are likely to introduce a relevant bias.                                      |
| Selective reporting                    | Low risk  | Our comment: No outcome of interest described in the method section is missing from the result section.                                                                                                                                    |

**Funding - quote:** "The authors wish to thank Dr. Gábor Deák for the Doppler examinations and András Tóth for taking the numerous thermographic images."

**Helianti et al. 2016**

| Type of bias                           | Judgment     | Support for judgment                                                                                                                                                                                                                                                                                                                                                                                                                                                                                                                                                                              |
|----------------------------------------|--------------|---------------------------------------------------------------------------------------------------------------------------------------------------------------------------------------------------------------------------------------------------------------------------------------------------------------------------------------------------------------------------------------------------------------------------------------------------------------------------------------------------------------------------------------------------------------------------------------------------|
| Random sequence generation             | Low risk     | Quote: "a randomization list was created using a computer-generated table containing random numbers.". Our comment: Probably done.                                                                                                                                                                                                                                                                                                                                                                                                                                                                |
| Allocation concealment                 | Low risk     | Our comment: Investigators are unable to predict the allocation made by a computer-based randomization program.                                                                                                                                                                                                                                                                                                                                                                                                                                                                                   |
| Blinding of participants and personnel | Unclear risk | Quote: "Both investigator and participants did not know whether laser acupuncture active treatment or placebo treatment was being administered. Only the researcher and her assistant had the code to determine which treatment was given. Both groups used the same laser device and the same study site. Participant blinding was optimized by using eye mask and headset (...)". Our comment: The experimental group was treated with invisible laser. The investigator and participants were probably blinded, but it is unclear who administered the therapy and if this person was blinded. |
| Blinding of assessor                   | Low risk     | Our comment: All outcomes of interest are self-reported (participant-assessed) and the participants were probably blinded.                                                                                                                                                                                                                                                                                                                                                                                                                                                                        |
| Incomplete data                        | Low risk     | Our comment: 4.8% of the participants were not evaluated. This number is unlikely to introduce a relevant bias.                                                                                                                                                                                                                                                                                                                                                                                                                                                                                   |
| Selective reporting                    | Low risk     | Our comment: No outcome of interest described in the method section is missing from the result section.                                                                                                                                                                                                                                                                                                                                                                                                                                                                                           |

**Funding sources:** Not stated.



**Hinman et al. 2014**

| Type of bias                           | Judgment | Support for judgment                                                                                                                                                                                                                                       |
|----------------------------------------|----------|------------------------------------------------------------------------------------------------------------------------------------------------------------------------------------------------------------------------------------------------------------|
| Random sequence generation             | Low risk | Quote: "An investigator (K.N.) accessed the computerized randomization to reveal allocation."<br>Our comment: Probably done.                                                                                                                               |
| Allocation concealment                 | Low risk | Our comment: It seems unlikely that the investigators could predict the group allocation due to the sequence generation.                                                                                                                                   |
| Blinding of participants and personnel | Low risk | Quote: "Participant codes for randomized laser treatment groups were pre-programmed into the laser machines by an independent biomechanical engineer to permit blinding of acupuncturist and participants in these groups."<br>Our comment: Probably true. |
| Blinding of assessor                   | Low risk | Our comment: All outcomes of interest are self-reported (participant-assessed) and the participants were probably blinded.                                                                                                                                 |
| Incomplete data                        | Low risk | Our comment: 8.45% and 17.14% had dropped out from the experimental and placebo group at week 12, respectively. Intention to treat analysis was used and this analysis and the results did not differ from the per-protocol analysis.                      |
| Selective reporting                    | Low risk | Our comment: Reported in adherence to a protocol (Australian New Zealand Clinical Trials Registry Number: ACTRN12609001001280).                                                                                                                            |

**Funding - quote:** "Funding/Support: This trial was funded by the National Health and Medical Research Council (project 566783). Drs Hinman and Bennell are both funded in part by Australian Research Council Future Fellowships (FT130100175 and FT0991413, respectively). Dr McCrory is funded in part by a National Health and Medical Research Council Practitioner Fellowship (1026383). Dr Pirotta is funded in part by a National Health and Medical Research Council Career Development Fellowship (1050830). Dr Williamson was funded in part by a National Health and Medical Research Council grant (1004233). Role of the Funder/Sponsor: The study sponsor had no role in the design and conduct of the study; collection, management, analysis, and interpretation of the data; preparation, review, or approval of the manuscript; and decision to submit the manuscript for publication."

**Jensen et al. 1987**

| Type of bias                           | Judgment     | Support for judgment                                                                                                                                                                                                                                                                                                                                                                 |
|----------------------------------------|--------------|--------------------------------------------------------------------------------------------------------------------------------------------------------------------------------------------------------------------------------------------------------------------------------------------------------------------------------------------------------------------------------------|
| Random sequence generation             | Unclear risk | Our comment: The authors state that the study is randomized but there is no description of the randomization method.                                                                                                                                                                                                                                                                 |
| Allocation concealment                 | Unclear risk | Our comment: Not enough information to make a qualified judgment.                                                                                                                                                                                                                                                                                                                    |
| Blinding of participants and personnel | Unclear risk | Quote: (Translated from Danish) "Two coded laser devices of the same appearance was utilized in the trial. One of the devices was inactive and served as control. The other was active with infrared laser."<br>Our comment: The experimental group was treated with invisible laser. The participants were probably blinded, but it is unknown whether the therapists were blinded. |
| Blinding of assessor                   | Low risk     | Our comment: All outcomes of interest are assessed and reported by the participants. The experimental group was treated with invisible laser.                                                                                                                                                                                                                                        |
| Incomplete data                        | Low risk     | Our comment: 1 participant was not evaluated.                                                                                                                                                                                                                                                                                                                                        |
| Selective reporting                    | Low risk     | Our comment: No outcome of interest described in the method section is missing from the result section.                                                                                                                                                                                                                                                                              |

**Funding:** Not stated.

**Kheshie et al. 2014**

| Type of bias                           | Judgment  | Support for judgment                                                                                                                                                                                               |
|----------------------------------------|-----------|--------------------------------------------------------------------------------------------------------------------------------------------------------------------------------------------------------------------|
| Random sequence generation             | Low risk  | Quote: "Randomization was performed simply by assigning a specific identification number for each patient. These numbers were randomized into three groups using the SPSS program".<br>Our comment: Probably done. |
| Allocation concealment                 | Low risk  | Our comment: Investigators are unable to predict the allocation made by a computer-based randomization program.                                                                                                    |
| Blinding of participants and personnel | High risk | Our comment: The study is described as single-blinded and the participants were probably blinded. Thus, the therapist was not blinded.                                                                             |
| Blinding of assessor                   | Low risk  | Our comment: All outcomes of interest are self-reported (participant-assessed) and the participants were probably blinded.                                                                                         |
| Incomplete data                        | Low risk  | Our comment: 15% and 0% dropped out of the placebo and experimental group, respectively. These numbers are unlikely to introduce a relevant bias.                                                                  |
| Selective reporting                    | Low risk  | Our comment: No outcome of interest described in the method section is missing from the result section.                                                                                                            |

**Funding - quote:** "This research received a grant from the Institute of Scientific Research and Revival of Islamic Heritage at Umm Al-Qura University, Makkah, Saudi Arabia."



1  
2  
3  
4  
5  
6  
7  
8  
9  
10  
11  
12  
13  
14  
15  
16  
17  
18  
19  
20  
21  
22  
23  
24  
25  
26  
27  
28  
29  
30  
31  
32  
33  
34  
35  
36  
37  
38  
39  
40  
41  
42  
43  
44  
45  
46  
47  
48  
49  
50  
51  
52  
53  
54  
55  
56  
57  
58  
59  
60**Koutenaai et al. 2017**

| Type of bias                           | Judgment     | Support for judgment                                                                                                                                                                                                                                                                   |
|----------------------------------------|--------------|----------------------------------------------------------------------------------------------------------------------------------------------------------------------------------------------------------------------------------------------------------------------------------------|
| Random sequence generation             | Low risk     | Quote: "...were assigned randomly (using random blocks) ...".<br>Our comment: Probably done.                                                                                                                                                                                           |
| Allocation concealment                 | Low risk     | Our comment: The use of random blocks was probably sufficient.                                                                                                                                                                                                                         |
| Blinding of participants and personnel | Low risk     | Quote: "The placebo group also lasted for 70 seconds in these places, but the laser had no output".<br>Our comment: Both participants and therapists were probably blinded because they described the study as double-blinded and treated the intervention group with invisible laser. |
| Blinding of assessor                   | Low risk     | Our comment: All outcomes of interest are self-reported (participant-assessed) and the participants were probably blinded.                                                                                                                                                             |
| Incomplete data                        | Unclear risk | Our comment: Not enough information to make a qualified judgment.                                                                                                                                                                                                                      |
| Selective reporting                    | Low risk     | Our comment: No outcome of interest described in the method section is missing from the result section.                                                                                                                                                                                |

**Funding - quote:** "The study was supported by the Department of Physiotherapy at the University of Social Welfare and Rehabilitation Sciences."

**Mohammed et al. 2017**

| Type of bias                           | Judgment     | Support for judgment                                                                                                                                                                                                                                                                                                                                                                                 |
|----------------------------------------|--------------|------------------------------------------------------------------------------------------------------------------------------------------------------------------------------------------------------------------------------------------------------------------------------------------------------------------------------------------------------------------------------------------------------|
| Random sequence generation             | Unclear risk | Our comment: The authors state that the study is randomized but there is no description of the randomization method.                                                                                                                                                                                                                                                                                 |
| Allocation concealment                 | Unclear risk | Our comment: Not enough information to make a qualified judgment.                                                                                                                                                                                                                                                                                                                                    |
| Blinding of participants and personnel | High risk    | Quote: "(...) placebo laser (laser probe is directed to the same acupoints while the device is off)".<br>Our comment: Probably done. The experimental group was treated with invisible laser. The study is described as single-blinded and the participants were probably blinded. As there was no description of a blinding procedure of the therapist, we assume that this person was not blinded. |
| Blinding of assessor                   | Low risk     | Our comment: All outcomes of interest are self-reported (participant-assessed) and the participants were probably blinded.                                                                                                                                                                                                                                                                           |
| Incomplete data                        | Unclear risk | Our comment: Not enough information to make a qualified judgment.                                                                                                                                                                                                                                                                                                                                    |
| Selective reporting                    | Low risk     | Our comment: No outcome of interest described in the method section is missing from the result section.                                                                                                                                                                                                                                                                                              |

**Funding - quote:** Not stated. The authors state: "The funding organization(s) played no role in the study design; in the collection, analysis, and interpretation of data; in the writing of the report; or in the decision to submit the report for publication."

**Nambi et al. 2016**

| Type of bias                           | Judgment | Support for judgment                                                                                                                                                                                                                                                                                                                             |
|----------------------------------------|----------|--------------------------------------------------------------------------------------------------------------------------------------------------------------------------------------------------------------------------------------------------------------------------------------------------------------------------------------------------|
| Random sequence generation             | Low risk | Quote: "Thirty-four subjects were randomized into two groups (active and placebo) by an investigator who is not involved in assessment, diagnosis or treatment. Randomization was performed by using sealed randomly filled envelopes from a bowl containing an equal number of slips with either number 1 or 2".<br>Our comment: Probably done. |
| Allocation concealment                 | Low risk | Our comment: It seems unlikely that the investigators could predict the group allocation due to the sequence generation.                                                                                                                                                                                                                         |
| Blinding of participants and personnel | Low risk | Quote: "Subjects and the physiotherapist responsible for the evaluation were unaware of randomization results". "super pulsed laser with (...) or with a placebo probe (...) of the same appearance and display".<br>Our comment: Probably true. The experimental group was treated with invisible laser.                                        |
| Blinding of assessor                   | Low risk | Quote: "All subjects were evaluated by the same blinded physiotherapist".<br>Our comment: Probably done. All outcomes of interest are assessed and reported by the participants who were probably blinded.                                                                                                                                       |
| Incomplete data                        | Low risk | Quote: "The required sample for the study was 17 subjects per group". "All 34 subjects completed the study with the 8-week follow-up evaluation".<br>Our comment: Probably true.                                                                                                                                                                 |
| Selective reporting                    | Low risk | Our comment: No outcomes of interest described in the method section was missing in the result section.                                                                                                                                                                                                                                          |

**Funding - quote:** "Authors are grateful to the Deanship of scientific Research, Prince Sattam Bin Abdul Aziz University, Al-Kharj, Saudi Arabia for the financial support to carry out this project no 2015/01/4375. Research funding program: Specialized Research Grant program (Health)".

**Nivbrant et al. 1992**

| Type of bias                           | Judgment     | Support for judgment                                                                                                                                                                                                                                                                                                                                               |
|----------------------------------------|--------------|--------------------------------------------------------------------------------------------------------------------------------------------------------------------------------------------------------------------------------------------------------------------------------------------------------------------------------------------------------------------|
| Random sequence generation             | Low risk     | Our comment: Randomization was performed by drawing of randomly filled envelopes describing the treatment group.                                                                                                                                                                                                                                                   |
| Allocation concealment                 | Unclear risk | Our comment: It is unclear whether envelopes were sequentially numbered, opaque and sealed.                                                                                                                                                                                                                                                                        |
| Blinding of participants and personnel | Low risk     | Quote (translated from Swedish): <i>"The placebo emitter was visually identical to the active laser. A practitioner otherwise not involved in the trial treated the participants with laser. The practitioner was unaware of which was the active and inactive laser."</i><br>Our comment: Probably done. The experimental group was treated with invisible laser. |
| Blinding of assessor (detection bias)  | Low risk     | Our comment: All outcomes of interest are self-reported (participant-assessed) and the participants were probably blinded.                                                                                                                                                                                                                                         |
| Incomplete data                        | Low risk     | Our comment: 13% in each group were not evaluated. This number is unlikely to introduce a relevant bias.                                                                                                                                                                                                                                                           |
| Selective reporting                    | Low risk     | Our comment: No outcome of interest described in the method section is missing from the result section.                                                                                                                                                                                                                                                            |

**Funding:** Not stated.

**Rayegani et al. 2012**

| Type of bias                           | Judgment     | Support for judgment                                                                                                                                                                                                                                                                                   |
|----------------------------------------|--------------|--------------------------------------------------------------------------------------------------------------------------------------------------------------------------------------------------------------------------------------------------------------------------------------------------------|
| Random sequence generation             | Low risk     | Randomization was ensured by having patients randomly choose sealed envelopes from a bowl.                                                                                                                                                                                                             |
| Allocation concealment                 | Unclear risk | Our comment: It is unclear whether the envelopes were opaque.                                                                                                                                                                                                                                          |
| Blinding of participants and personnel | Low risk     | Quote: <i>"Neither the patients nor the operator knew which was the active or placebo LLLT probe."</i> <i>"The placebo group was treated with an ineffective probe (power 0 mW) and with the same method."</i><br>Our comment: Probably done. The experimental group was treated with invisible laser. |
| Blinding of assessor                   | Low risk     | Our comment: All outcomes of interest are self-reported (participant-assessed) and the participants were probably blinded.                                                                                                                                                                             |
| Incomplete data                        | Unclear risk | Our comment: Not enough information to make a qualified judgment.                                                                                                                                                                                                                                      |
| Selective reporting                    | Low risk     | Our comment: No outcome of interest described in the method section is missing from the result section.                                                                                                                                                                                                |

**Funding:** Not stated.

**Tascioglu et al. 2004**

| Type of bias                           | Judgment     | Support for judgment                                                                                                                                                                                    |
|----------------------------------------|--------------|---------------------------------------------------------------------------------------------------------------------------------------------------------------------------------------------------------|
| Random sequence generation             | Low risk     | Quote: <i>"Sixty patients, who fulfilled the entry criteria, were admitted to the study and they were randomly divided into three groups using numbered envelopes"</i> .<br>Our comment: Probably done. |
| Allocation concealment                 | Unclear risk | Our comment: It is unclear whether the envelopes were sealed and opaque.                                                                                                                                |
| Blinding of participants and personnel | High risk    | Our comment: The study is described as single-blinded and the participants were probably blinded. Thus, the therapist was probably not blinded.                                                         |
| Blinding of assessor                   | Low risk     | Our comment: All outcomes of interest are assessed and reported by the participants who were probably blinded.                                                                                          |
| Incomplete data                        | Low risk     | Our comment: No dropouts.                                                                                                                                                                               |
| Selective reporting                    | Low risk     | Our comment: No outcome of interest described in the method section is missing from the result section.                                                                                                 |

**Funding:** Not stated.

## Youssef et al. 2016

| Type of bias                           | Judgment     | Support for judgment                                                                                                                                                                                                                                                                                                                                                                                             |
|----------------------------------------|--------------|------------------------------------------------------------------------------------------------------------------------------------------------------------------------------------------------------------------------------------------------------------------------------------------------------------------------------------------------------------------------------------------------------------------|
| Random sequence generation             | Low risk     | Quote: "They were assigned randomly to three groups by a blinded and independent research assistant who opened sealed envelopes that contained a computer-generated randomization card according to the recruitment diagram."<br>Our comment: Probably done.                                                                                                                                                     |
| Allocation concealment                 | Low risk     | Our comment: Not enough information to make a qualified judgment.                                                                                                                                                                                                                                                                                                                                                |
| Blinding of participants and personnel | Unclear risk | Quote: "[...] in the placebo group, procedure was identical but without emission of energy. The laser equipment had two identical pens, one for the active treatment and one for the placebo treatment (sealed)."<br>Our comment: Probably done. The experimental group was treated with invisible laser. The participants were probably blinded, but there was no information regarding blinding of therapists. |
| Blinding of assessor                   | Low risk     | Our comment: All outcomes of interest are self-reported (participant-assessed) and the participants were probably blinded.                                                                                                                                                                                                                                                                                       |
| Incomplete data                        | Low risk     | 1 participant was not evaluated.                                                                                                                                                                                                                                                                                                                                                                                 |
| Selective reporting                    | Low risk     | Our comment: No outcome of interest described in the method section is missing from the result section.                                                                                                                                                                                                                                                                                                          |

Funding: Not stated.

## LLLT with and without exercise therapy

Subgroup analyses were performed to assess the impact of exercise therapy on the effect of LLLT in a treatment package (results are from immediately after the end of therapy, primarily). LLLT was significantly superior to the placebo-control both with and without exercise therapy (figure 16-17). The levels of statistical heterogeneity were unaltered in the pain analyses (figure 16), and slightly lowered in the disability analysis (figure 17).

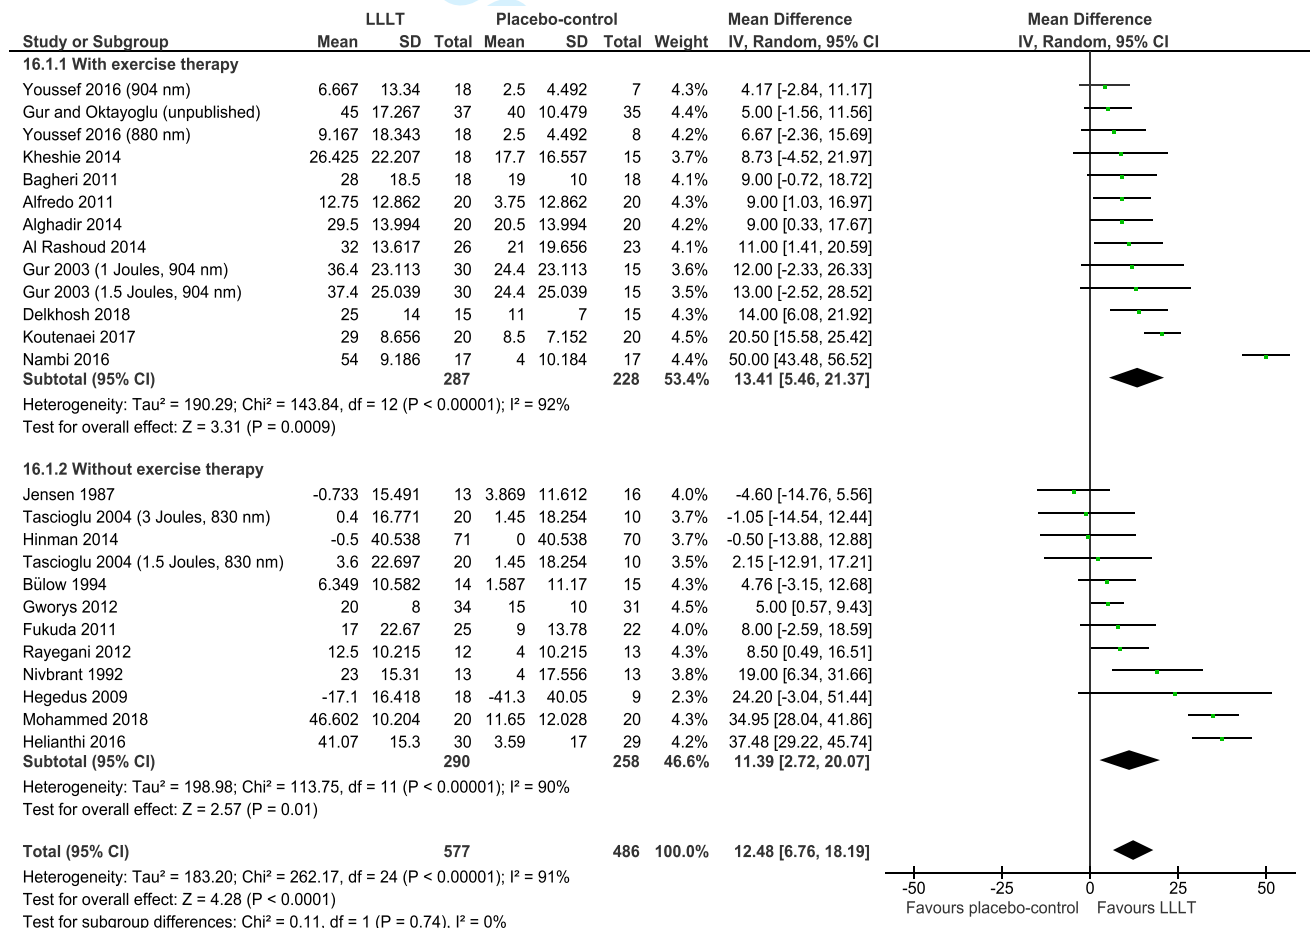

Figure 16 | LLLT with and without exercise therapy (pain)







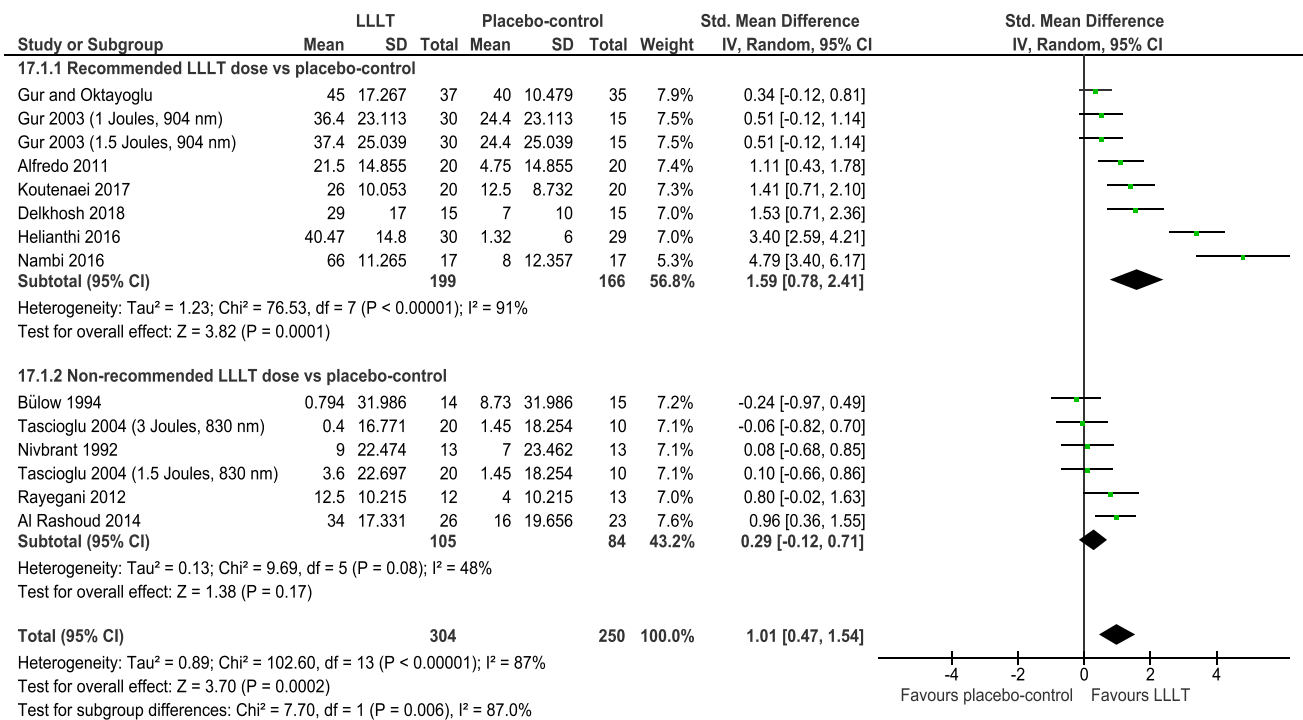

Figure 21 | Standardized Mean Difference (pain results from 2-12-weeks follow-ups)

References

- Alayat MSM, Aly THA, Elsayed AEM, Fadil ASM. Efficacy of pulsed Nd:YAG laser in the treatment of patients with knee osteoarthritis: A randomized controlled trial. *Lasers Med Sci* 2017; **32**: 503-11.
- Ciechanowska K, Lukowicz M, Weber-Zimmermann M, Buszko K. Ocena skuteczności terapii skojarzonej - Laseroterapii i terapii zinnem z kompresoterapia w leczeniu objawow gonartrozy. *Postepy Rehabilitacji* 2008.
- Coelho, Leal-Junior E, Biasotto-Gonzalez D, et al. Effectiveness of phototherapy incorporated into an exercise program for osteoarthritis of the knee: Study protocol for a randomized controlled trial. *BMC* 2014; **15**.
- de Matos Brunelli Braghin R, Cavalheiro Libardi E, Junqueira C, et al. The effect of low-level laser therapy and physical exercise on pain, stiffness, function, and spatiotemporal gait variables in subjects with bilateral knee osteoarthritis: A blind randomized clinical. *Disabil Rehabil: Epub ahead of print* 2018
- de Meneses SR, Hunter DJ, Young Docko E, Pasqual Marques A. Effect of low-level laser therapy (904 nm) and static stretching in patients with knee osteoarthritis: A protocol of randomised controlled trial. *BMC Musculoskelet Disord* 2015; **16**.
- de Paula Gomes CAF, Leal-Junior ECP, Dibai-Filho AV, et al. Incorporation of photobiomodulation therapy into a therapeutic exercise program for knee osteoarthritis: A placebo-controlled, randomized, clinical trial. *Lasers Surg Med* 2018; **8**: 819-28.
- Giavelli S, Fava G, Castronuovo G, Spinoglio L, Galanti A. Laserterapia con bassa potenza nelle malattie osteoarticolari nel paziente geriatrico. *La Radiologia medica* 1998; **95**: 303-9.
- Gotte S, Keyi W, Wirzbach E. Doppelblindstudie zur uberprufung der wirksamkeit und vertaraglichkeit einer niederenergetischen lasertherapie bei patienten mit aktivierter gonarthrose [German]. *Jatros Orthopadie* 1995; **12**: 30-4.
- Kujawa J, Talar J, Gworys K, Gworys P, Pieszynski I, Janiszewski M. The analgesic effectiveness of laser therapy in patients with gonarthrosis: An evaluation. *Ortop Traumatol Rehabil* 2004; **6**: 356-66.
- Leal-Junior ECP, Johnson DS, Saltmarche A, Demchak T. Adjunctive use of combination of super-pulsed laser and light-emitting diodes phototherapy on nonspecific knee pain: Double-blinded randomized placebo-controlled trial. *Lasers Med Sci* 2014; **29**: 1839-47.
- Lepilina A, Nikulicheva I, Speranskii V. Lazeroterapiia pri revmatoidnom artrite i deformiruiushchem osteoartroze. *Sov Med* 1990: 82-4.
- Marquina N, Dumoulin-White R, Mandel A, Lilge L. Laser therapy applications for osteoarthritis and chronic joint pain - A randomized placebo-controlled clinical trial. *Photonics Lasers Med* 2012; **1**: 299-307.
- Montes-Molina R, Madronero-Agreda MA, Romojaro-Rodriguez AB, et al. Efficacy of



- interferential low-level laser therapy using two independent sources in the treatment of knee pain. *Photomed Laser Surg* 2009; **27**: 467-71.
- 14 Nakamura T, Ebihara S, Ohkuni I, et al. Low level laser therapy for chronic knee joint pain patients. *Laser Ther* 2014; **23**: 273-7.
- 15 Paolillo FR, Paolillo AR, João JP, et al. Ultrasound plus low-level laser therapy for knee osteoarthritis rehabilitation: A randomized, placebo-controlled trial. *Rheumatol int* 2018; **38**: 785-93. doi: 10.1007/s00296-018-4000-x
- 16 Pinfildi CE, Sardim AC, Yi LC, Prado RP. Neuromuscular training with phototherapy associated in patients knee osteoarthritis. *Arch Phys Med Rehabil* 2013; **94**: e59-e60.
- 17 Ren XM, Wang M, Shen XY, Wang LZ, Zhao L. Clinical observation on acupoint irradiation with combined laser or red light on patients with knee osteoarthritis of yang deficiency and cold coagulation type. *Zhongguo Zhen Jiu* 2010; **30**: 977-81.
- 18 Shen X, Zhao L, Ding G, et al. Effect of combined laser acupuncture on knee osteoarthritis: a pilot study. *Lasers med sci* 2009; **24**: 129-36.
- 19 Soleimanpour H, Gahramani K, Taheri R, et al. The effect of low-level laser therapy on knee osteoarthritis: Prospective, descriptive study. *Lasers med sci* 2014; **29**: 1695-700.
- 20 Stelian J, Gil I, Habot B, et al. Improvement of pain and disability in elderly patients with degenerative osteoarthritis of the knee treated with narrow-band light therapy. *J Am Geriatr Soc* 1992; **40**: 23-6.
- 21 Trelles MA, Rigau J, Sala P, Calderhead G, Ohshiro T. Infrared diode laser in low reactive-level laser therapy (LLLT) for knee osteoarthrosis. *Laser Therapy* 1991; **3**: 149-53.
- 22 Wang L, Wu F, Zhao L, et al. Patterns of traditional chinese medicine diagnosis in thermal laser acupuncture treatment of knee osteoarthritis. *Evidence-Based Complementary and Alternative Medicine* 2013.
- 23 Yavuz M, Ataoglu S, Ozsahin M, Baki A, Icmel C. Primer Diz Osteoartritinde İzokinetik Egzersiz, Lazer ve Diklofenak İyontoforezi Uygulamalarının Etkilerinin ve Etkinliklerinin Karşılaştırılması. *Düzce Medical Journal* 2013; **15**: 15-21.
- 24 Yurtkuran M, Alp A, Konur S, Özçakir S, Bingol U. Laser acupuncture in knee osteoarthritis: A double-blind, randomized controlled study. *Photomed Laser Surg* 2007; **25**: 14-20.
- 25 Yuvarani G, Thonisha Xavier L, Mohan Kumar G, et al. To compare the effectiveness between LASER and neuromuscular electrical stimulation in knee osteoarthritis. *Biomedicine (India)* 2018; **38**: 142-46.
- 26 Zhao L, Shen X, Cheng K, et al. Validating a nonacupoint sham control for laser treatment of knee osteoarthritis. *Photomed Laser Surg* 2010; **28**: 351-6.
- 27 Zou YC, Deng HY, Mao Z, Zhao C, Huang J, Liu G. Decreased synovial fluid ghrelin levels are linked with disease severity in primary knee osteoarthritis patients and are increased following laser therapy. *Clin Chim Acta* 2017; **470**: 64-9.

## PRISMA checklist

| Section/topic                      | #  | Checklist item                                                                                                                                                                                                                                                                                              | Reported on page #                                    |
|------------------------------------|----|-------------------------------------------------------------------------------------------------------------------------------------------------------------------------------------------------------------------------------------------------------------------------------------------------------------|-------------------------------------------------------|
| <b>TITLE</b>                       |    |                                                                                                                                                                                                                                                                                                             |                                                       |
| Title                              | 1  | Identify the report as a systematic review, meta-analysis, or both.                                                                                                                                                                                                                                         | Page 1                                                |
| <b>ABSTRACT</b>                    |    |                                                                                                                                                                                                                                                                                                             |                                                       |
| Structured summary                 | 2  | Provide a structured summary including, as applicable: background; objectives; data sources; study eligibility criteria, participants, and interventions; study appraisal and synthesis methods; results; limitations; conclusions and implications of key findings; systematic review registration number. | Page 1                                                |
| <b>INTRODUCTION</b>                |    |                                                                                                                                                                                                                                                                                                             |                                                       |
| Rationale                          | 3  | Describe the rationale for the review in the context of what is already known.                                                                                                                                                                                                                              | Page 2-3                                              |
| Objectives                         | 4  | Provide an explicit statement of questions being addressed with reference to participants, interventions, comparisons, outcomes, and study design (PICOS).                                                                                                                                                  | Page 3 + PROSPERO protocol                            |
| <b>METHODS</b>                     |    |                                                                                                                                                                                                                                                                                                             |                                                       |
| Protocol and registration          | 5  | Indicate if a review protocol exists, if and where it can be accessed (e.g., Web address), and, if available, provide registration information including registration number.                                                                                                                               | Page 3                                                |
| Eligibility criteria               | 6  | Specify study characteristics (e.g., PICOS, length of follow-up) and report characteristics (e.g., years considered, language, publication status) used as criteria for eligibility, giving rationale.                                                                                                      | Page 3 + PROSPERO protocol                            |
| Information sources                | 7  | Describe all information sources (e.g., databases with dates of coverage, contact with study authors to identify additional studies) in the search and date last searched.                                                                                                                                  | Page 3 + PROSPERO protocol                            |
| Search                             | 8  | Present full electronic search strategy for at least one database, including any limits used, such that it could be repeated.                                                                                                                                                                               | Supplementary material                                |
| Study selection                    | 9  | State the process for selecting studies (i.e., screening, eligibility, included in systematic review, and, if applicable, included in the meta-analysis).                                                                                                                                                   | Page 3 + PROSPERO protocol                            |
| Data collection process            | 10 | Describe method of data extraction from reports (e.g., piloted forms, independently, in duplicate) and any processes for obtaining and confirming data from investigators.                                                                                                                                  | Page 4 + PROSPERO protocol                            |
| Data items                         | 11 | List and define all variables for which data were sought (e.g., PICOS, funding sources) and any assumptions and simplifications made.                                                                                                                                                                       | Page 5-8 (table 1-2) + PROSPERO protocol              |
| Risk of bias in individual studies | 12 | Describe methods used for assessing risk of bias of individual studies (including specification of whether this was done at the study or outcome level), and how this information is to be used in any data synthesis.                                                                                      | Page 3-4 + PROSPERO protocol + supplementary material |
| Summary measures                   | 13 | State the principal summary measures (e.g., risk ratio, difference in means).                                                                                                                                                                                                                               | Page 4 + PROSPERO protocol                            |
| Synthesis of results               | 14 | Describe the methods of handling data and combining results of studies, if done, including measures of consistency (e.g., $I^2$ ) for each meta-analysis.                                                                                                                                                   | Page 4 + supplementary material + PROSPERO protocol   |

## PRISMA checklist (continued)

| Section/topic                 | #  | Checklist item                                                                                                                                                                                           | Reported on page #                                             |
|-------------------------------|----|----------------------------------------------------------------------------------------------------------------------------------------------------------------------------------------------------------|----------------------------------------------------------------|
| Risk of bias across studies   | 15 | Specify any assessment of risk of bias that may affect the cumulative evidence (e.g., publication bias, selective reporting within studies).                                                             | Page 4 + 9 + supplementary material                            |
| Additional analyses           | 16 | Describe methods of additional analyses (e.g., sensitivity or subgroup analyses, meta-regression), if done, indicating which were pre-specified.                                                         | Page 9 + supplementary material                                |
| <b>RESULTS</b>                |    |                                                                                                                                                                                                          |                                                                |
| Study selection               | 17 | Give numbers of studies screened, assessed for eligibility, and included in the review, with reasons for exclusions at each stage, ideally with a flow diagram.                                          | Page 4-5 + supplementary material (table of excluded articles) |
| Study characteristics         | 18 | For each study, present characteristics for which data were extracted (e.g., study size, PICOS, follow-up period) and provide the citations.                                                             | Page 5-8 (table 1-2)                                           |
| Risk of bias within studies   | 19 | Present data on risk of bias of each study and, if available, any outcome level assessment (see item 12).                                                                                                | Page 9 (figure 6) + supplementary material                     |
| Results of individual studies | 20 | For all outcomes considered (benefits or harms), present, for each study: (a) simple summary data for each intervention group (b) effect estimates and confidence intervals, ideally with a forest plot. | figure 2-5                                                     |
| Synthesis of results          | 21 | Present results of each meta-analysis done, including confidence intervals and measures of consistency.                                                                                                  | Page 8-9 + figure 2-5 + supplementary material                 |
| Risk of bias across studies   | 22 | Present results of any assessment of risk of bias across studies (see Item 15).                                                                                                                          | Page 9 + supplementary material                                |
| Additional analysis           | 23 | Give results of additional analyses, if done (e.g., sensitivity or subgroup analyses, meta-regression [see Item 16]).                                                                                    | Page 9 + supplementary material                                |
| <b>DISCUSSION</b>             |    |                                                                                                                                                                                                          |                                                                |
| Summary of evidence           | 24 | Summarize the main findings including the strength of evidence for each main outcome; consider their relevance to key groups (e.g., healthcare providers, users, and policy makers).                     | Page 10                                                        |
| Limitations                   | 25 | Discuss limitations at study and outcome level (e.g., risk of bias), and at review-level (e.g., incomplete retrieval of identified research, reporting bias).                                            | Page 11                                                        |
| Conclusions                   | 26 | Provide a general interpretation of the results in the context of other evidence, and implications for future research.                                                                                  | Page 11                                                        |
| <b>FUNDING</b>                |    |                                                                                                                                                                                                          |                                                                |
| Funding                       | 27 | Describe sources of funding for the systematic review and other support (e.g., supply of data); role of funders for the systematic review.                                                               | Page 11 + PROSPERO protocol                                    |

# BMJ Open

## Efficacy of low-level laser therapy on pain and disability in knee osteoarthritis: A systematic review and meta-analysis of randomized placebo-controlled trials

|                                 |                                                                                                                                                                                                                                                                                                                                                                                                                                                                                                                                                                                                                                                                                                                                                                                       |
|---------------------------------|---------------------------------------------------------------------------------------------------------------------------------------------------------------------------------------------------------------------------------------------------------------------------------------------------------------------------------------------------------------------------------------------------------------------------------------------------------------------------------------------------------------------------------------------------------------------------------------------------------------------------------------------------------------------------------------------------------------------------------------------------------------------------------------|
| Journal:                        | <i>BMJ Open</i>                                                                                                                                                                                                                                                                                                                                                                                                                                                                                                                                                                                                                                                                                                                                                                       |
| Manuscript ID                   | bmjopen-2019-031142.R2                                                                                                                                                                                                                                                                                                                                                                                                                                                                                                                                                                                                                                                                                                                                                                |
| Article Type:                   | Research                                                                                                                                                                                                                                                                                                                                                                                                                                                                                                                                                                                                                                                                                                                                                                              |
| Date Submitted by the Author:   | 11-Sep-2019                                                                                                                                                                                                                                                                                                                                                                                                                                                                                                                                                                                                                                                                                                                                                                           |
| Complete List of Authors:       | <p>Stausholm, Martin; University of Bergen, Department of Global Public Health and Primary Care<br/> Naterstad, Ingvill; University of Bergen, Department of Global Public Health and Primary Care<br/> Joensen, Jon; University of Bergen, Department of Global Public Health and Primary Care<br/> Lopes-Martins, Rodrigo; Universidade do Vale do Paraíba, Instituto de Pesquisa &amp; Desenvolvimento<br/> Sæbø, Humaira; University of Bergen, Department of Global Public Health and Primary Care<br/> Lund, Hans; Hogskulen pa Vestlandet, Centre for Evidence-Based Practice<br/> Fersum, Kjartan; University of Bergen, Department of Global Public Health and Primary Care<br/> Bjordal, Jan; University of Bergen, Department of Global Public Health and Primary Care</p> |
| <b>Primary Subject Heading</b>: | Rehabilitation medicine                                                                                                                                                                                                                                                                                                                                                                                                                                                                                                                                                                                                                                                                                                                                                               |
| Secondary Subject Heading:      | Public health, Rheumatology                                                                                                                                                                                                                                                                                                                                                                                                                                                                                                                                                                                                                                                                                                                                                           |
| Keywords:                       | Photobiomodulation therapy, Laser therapy < DERMATOLOGY, Knee osteoarthritis, Systematic review, Meta-analysis                                                                                                                                                                                                                                                                                                                                                                                                                                                                                                                                                                                                                                                                        |
|                                 |                                                                                                                                                                                                                                                                                                                                                                                                                                                                                                                                                                                                                                                                                                                                                                                       |

SCHOLARONE™  
Manuscripts

# Efficacy of low-level laser therapy on pain and disability in knee osteoarthritis: A systematic review and meta-analysis of randomized placebo-controlled trials

Martin Bjørn Stausholm<sup>1</sup>, Ingvill Fjell Naterstad<sup>1</sup>, Jon Joensen<sup>1</sup>, Rodrigo Alvaro Brandão Lopes-Martins<sup>2</sup>, Humaira Sæbø<sup>1</sup>, Hans Lund<sup>3</sup>, Kjartan Vibe Fersum<sup>1</sup>, Jan Magnus Bjordal<sup>1</sup>

<sup>1</sup>Department of Global Public Health and Primary Care, University of Bergen, Bergen, Norway

<sup>2</sup>Instituto de Pesquisa & Desenvolvimento, Universidade do Vale do Paraíba, São José dos Campos, Brazil

<sup>3</sup>Centre for Evidence-Based Practice, Western Norway University of Applied Sciences, Bergen, Norway

**Correspondence to:** Martin Bjørn Stausholm [m.b.stausholm@gmail.com](mailto:m.b.stausholm@gmail.com)

## Abstract

**Objectives** Low-Level Laser Therapy (LLLT) is not recommended in major knee osteoarthritis (KOA) treatment guidelines. We investigated whether a LLLT dose-response relationship exists in KOA.

**Design** Systematic review and meta-analysis.

**Data sources** Eligible articles were identified through PubMed, Embase, CINAHL, PEDro and CENTRAL on the 18<sup>th</sup> February 2019, reference lists, a book, citations and experts in the field.

**Eligibility criteria for selecting studies** We solely included randomized placebo-controlled trials involving participants with KOA according to the American College of Rheumatology and/or Kellgren/Lawrence criteria, in which LLLT was applied to participants' knee(s). There were no language restrictions.

**Data extraction and synthesis** The included trials were synthesised with random effects meta-analyses and subgrouped by dose using the World Association for Laser Therapy treatment recommendations. Cochrane's risk of bias tool was used.

**Results** 22 trials (N = 1063) were meta-analysed. Risk of bias was insignificant. Overall, pain was significantly reduced by LLLT compared to placebo at the end of therapy (14.23 mm VAS [95% CI: 7.31 to 21.14]) and during follow-ups 2-12 weeks later (15.92 mm VAS [95% CI: 6.47 to 25.37]). The subgroup analysis revealed that pain was significantly reduced by the recommended LLLT doses compared to placebo at the end of therapy (18.71 mm [95% CI: 9.42 to 27.99]) and during follow-ups 2-12 weeks after the end of therapy (23.23 mm VAS [95% CI: 10.60 to 35.86]). The pain reduction from the recommended LLLT doses peaked during follow-ups 2-4 weeks after the end of therapy (31.87 mm VAS significantly beyond placebo [95% CI: 18.18 to 45.56]).

Disability was also statistically significantly reduced by LLLT. No adverse events were reported.

**Conclusion** LLLT reduces pain and disability in KOA at 4-8 Joules with 785-860 nm wavelength and at 1-3 Joules with 904 nm wavelength per treatment spot.

**PROSPERO registration number** CRD42016035587.

**Keywords** Phototherapy; Laser therapy; Knee osteoarthritis; Systematic review; Meta-analysis

### Strengths and limitations of this study

- ▶ The review was conducted in conformance with a detailed a priori published protocol, which included e.g. laser dose subgroup criteria.
- ▶ No language restrictions were applied; four (18%) of the included trials were reported in non-English language.
- ▶ A series of meta-analyses were conducted to estimate the effect of Low-Level Laser Therapy on pain over time.
- ▶ Three persons each independently extracted the outcome data from the included trial articles to ensure high reproducibility of the meta-analyses.
- ▶ The review lacks quality of life analyses, a detailed disability time-effect analysis and direct comparisons between Low-Level Laser Therapy and other interventions.

### Introduction

Approximately 13% of women and 10% of men in the population aged  $\geq 60$  years suffer from knee osteoarthritis (KOA) in the USA.<sup>1</sup> KOA is a degenerative inflammatory disease affecting the entire joint and is characterised by progressive loss of cartilage and associated with pain, disability and reduced quality of life (QoL).<sup>1</sup> Increased inflammatory activity is associated with higher pain intensity and more rapid KOA disease progression.<sup>1 2</sup>

Some of the conservative intervention options for KOA are exercise therapy, Non-Steroidal Anti-Inflammatory Drugs (NSAIDs) and anti-inflammatory Low-Level Laser Therapy (LLLT). There is evidence that exercise therapy reduces pain and disability and improves QoL in persons with KOA.<sup>3</sup> NSAIDs are recommended in most KOA clinical treatment guidelines and is probably the most frequently prescribed therapy category for osteoarthritis, despite intake of these drugs is associated with negative side effects<sup>5</sup>, which is problematic, especially since the disease requires long-term treatment. Furthermore, a recently published network meta-analysis indicates that the pain relieving effect of NSAIDs in KOA beyond placebo is small to moderate (depending on drug type).<sup>6</sup>

Likewise, in the first systematic review on this topic, the pain relieving effect of NSAIDs was estimated to be only 10.1 mm on the 0-100 mm Visual Analogue Scale (VAS) better than placebo.<sup>7</sup> LLLT is a non-invasive treatment modality<sup>8 9</sup>, which has been reported to induce anti-inflammatory effects.<sup>9-14</sup> LLLT was compared to NSAID in rats with KOA by Tomazoni et al. in a laboratory; NSAID (10 mg diclofenac/knee/session) and LLLT (830 nm wavelength, 6 Joules/knee/session) reduced similar levels of inflammatory cells and metalloproteinase (MP-3 and MP-13). In addition, LLLT reduced the expression of pro-inflammatory cytokines (interleukin-1 $\beta$  and -6 and tumour necrosis factor  $\alpha$ ), myeloperoxidase and prostaglandin E<sub>2</sub> significantly more than NSAID did.<sup>10 11</sup> LLLT has been applied to rabbits with KOA three times per week for eight weeks in a placebo-controlled experiment by Wang et al. At the end of treatment week six, they found that LLLT had significantly reduced pain and synovitis and the production of interleukin-1 $\beta$ , inducible nitric oxide synthase and MP-3 and slowed down loss of Metalloproteinase Inhibitor 1. Two weeks later, LLLT had significantly reduced MP-1 and MP-13 and slowed down loss of collagen II, aggrecan and transforming growth factor beta, and the previous changes were sustained.<sup>12</sup> These findings indicate that the effects of LLLT increase over time.

Pallotta et al. conducted a study on LLLT in rats with acute knee inflammation, which demonstrated that even though LLLT (810 nm) significantly enhanced cyclooxygenase (COX-1 and -2) expression it significantly reduced several other inflammatory makers, i.e., leukocyte infiltration, myeloperoxidase, interleukin-1 and -6 and especially prostaglandin E<sub>2</sub>. Pallotta et al. hypothesised that the increase in COX levels by LLLT was involved in a production of inflammatory mediators related to the resolution of the inflammatory process.<sup>14</sup>



1  
2  
3  
4 LLLT is not recommended in major osteoarthritis treatment guidelines. LLLT for KOA was  
5 mentioned in the European League Against Rheumatism (EULAR) osteoarthritis guidelines (2018)  
6 but not recommended<sup>15</sup>, and in the Osteoarthritis Research Society International (OARSI)  
7 guidelines (2018), it was stressed that LLLT should not be considered a core intervention in the  
8 management of KOA.<sup>16</sup>  
9

10 This may be partly due to conflicting results of two recently published systematic reviews on the  
11 current topic (Huang et al. 2015 and Rayegani et al. 2017).<sup>8 17</sup> The conflicting results may arise  
12 from omission of relevant trials<sup>8 17-23</sup> and unresolved LLLT dose-related issues. Only Huang et al.  
13 conducted a LLLT dose-response relationship investigation in KOA, i.e., by subgrouping the trials  
14 by laser dose, but they did not consider that World Association for Laser Therapy (WALT)  
15 recommends applying four times the laser dose with continuous irradiation compared to super-  
16 pulsed irradiation.<sup>17 22 24-26</sup> Thus, it was unknown whether LLLT is effective in KOA, and we saw a  
17 need for a new systematic review.  
18

19 The objectives of the current review were to estimate the effectiveness of LLLT in KOA regarding  
20 knee pain, disability and QoL, and we only considered randomized placebo-controlled clinical trials  
21 (RCTs) for inclusion to minimize risk of bias.  
22

## 23 **Methods**

24 This review was conducted in adherence to a PROSPERO protocol (number CRD42016035587)  
25 and is reported in accordance with the Preferred Reporting Items of Systematic reviews and Meta-  
26 Analysis statement 2009.<sup>27</sup>  
27  
28

## 29 **Literature search and selection of studies**

30 Any identified study was included if it was a placebo-controlled RCT involving participants with  
31 KOA according to the American College of Rheumatology tool and/or a radiographic inspection  
32 with the Kellgren/Lawrence (K/L) criteria, in which LLLT was applied to participants' knee(s) and  
33 self-reported pain, disability and/or QoL was reported. There were no language restrictions.  
34 We updated a search for eligible articles indexed in PubMed, Embase, CINAHL, PEDro and  
35 CENTRAL on the 18<sup>th</sup> February 2019. The database search strings contained synonyms for LLLT  
36 and KOA, and keywords were added when optional. The PubMed search string is available in the  
37 supplementary material. The search was continued by reading reference lists of all the eligible trial  
38 and relevant review articles<sup>8 17 28</sup>, citations<sup>29-33</sup> and a laser book<sup>34</sup> and involving experts in the field.  
39 Two reviewers (MBS and JMB) each independently selected the trial articles. Both reviewers  
40 scrutinised the titles/abstracts of all the publications identified in the search, and any accessible full-  
41 text article was retrieved if it was judged potential eligible by at least one reviewer. Both reviewers  
42 evaluated the full texts of all potentially eligible retrieved articles and made an independent decision  
43 to include or exclude each article, with close attention to the inclusion criteria. When selection  
44 disagreements could not be resolved by discussion, a third reviewer (IFN) made the final  
45 consensus-based decision. Any retrieved article not fulfilling the inclusion criteria was omitted and  
46 listed with reason for exclusion.  
47  
48  
49

## 50 **Risk of bias analysis**

51 Two reviewers (MBS and JJ) each independently evaluated all included trials for risk of bias at the  
52 outcome level, using the Cochrane Collaboration's risk of bias tool.<sup>35</sup> When risk of bias  
53 disagreements could not be resolved by discussion, a third reviewer (IFN) made the final  
54 consensus-based decision. Likelihood of publication bias was assessed with graphical funnel  
55 plots.<sup>35</sup>  
56  
57  
58  
59  
60

## Data-extraction and meta-analysis

Three reviewers (MBS, JMB and KVF) each independently extracted the data for meta-analysis. Two of the reviewers (MBS and KVF) each independently collected the other trial characteristics. The data-extraction forms were subsequently compared, and data disagreements were resolved by consensus-based discussions. Summary data were extracted, unless published individual participant data were available.<sup>21</sup> The results from the included trials for statistical analysis were selected from outcome scales in adherence to hierarchies published by Juhl et al.<sup>36</sup>

Pain intensity was the primary outcome. As pain reported with continuous, numeric and categorical/Likert scales highly correlates with pain measured using the VAS, the scores of all pain scales were transformed to 0-100%, corresponding to 0-100 mm VAS.<sup>37</sup> The pain results were combined with the Mean Difference (MD) method, primarily using change scores, i.e., when only final scores could be obtained from a trial, change and final scores were mixed in the analysis, since the MD method allows for this without introducing bias.<sup>35</sup>

Self-reported disability results were synthesized using the Standardized Mean Difference (SMD) method using change scores solely. The SMD was adjusted to Hedges' *g* and interpreted as follows: SMDs of 0.2, ~ 0.5, and > 0.8 represent a small, moderate and large effect, respectively.<sup>35</sup>

Lack of QoL data prohibited an analysis of this outcome.

Random effects meta-analyses were conducted, and impact from heterogeneity (inconsistency) on the analyses was examined using  $I^2$  statistics. An  $I^2$  value of 0% indicates no inconsistency, and an  $I^2$  value of 100% indicates maximal inconsistency<sup>35</sup>; the values were categorised as low (25%), moderate (50%) and high (75%).<sup>38</sup>

Standard deviations (SD) for analysis were extracted or estimated from other variance data in a pre-specified prioritised order: (1) SD, (2) standard error, (3) 95% confidence interval, (4) P-value, (5) interquartile range, (6) median of correlations, (7) visually from graph or (8) other methods.<sup>35</sup>

The trials were subgrouped by adherence and non-adherence to the WALT recommendations for laser dose per treatment spot, as pre-specified. WALT recommends irradiating the knee joint line/synovia with the following doses per treatment spot:  $\geq 4$  Joules using 5-500 mW mean power 780-860 nm wavelength laser and/or  $\geq 1$  Joules using 5-500 mW mean power (> 1000 mW peak power) 904 nm wavelength laser.<sup>24 25</sup>

The main meta-analyses were conducted using two pre-specified time points of assessment, i.e., immediately after the end of LLLT and last time point of assessment 1-12 weeks after the end of LLLT (follow-up).

MBS performed the meta-analyses, under supervision of JMB, using the software programs Excel 2016 (Microsoft) and Review Manager Version 5.3 (Copenhagen: The Nordic Cochrane Centre, The Cochrane Collaboration, 2014).

## Patient and public involvement

Patients or the public were not involved in the conceptualisation or carrying out of this research.

## Results

In total, 2735 publications were identified in the search, of which 22 trial articles were judged eligible and included in the review (N = 1089) (figure 1 and table 1-2) with data for meta-analysis (N = 1063). Four included trials were not reported in the English language<sup>19 21 23 39</sup> and one included trial was unpublished (Gur and Oktayoglu). Excluded articles initially judged potentially eligible were listed with reasons for omission (supplementary material).

Figure 1 | Flow chart illustrating the trial identification process  
LLLT = Low-Level Laser Therapy.

At the group level, the mean age of the participants was 60.25 (50.11-69) years (data from 19 trials), the mean percentage of women was 69.63 (0-100) (data from 17 trials), the mean BMI of the participants was 29.55 (25.8-38) (data from 14 trials), the mean of median K/L grades was 2.37 (data from 13 trials) and the mean baseline pain was 63.61 mm VAS (35.25-92) (data from 22 trials). LLLT was used as an adjunct to exercise therapy in eleven trials. The mean duration of the treatment periods was 3.53 weeks with the recommended LLLT doses and 3.89 weeks with the non-recommended LLLT doses (table 1-2). Non-recommended LLLT doses were applied in nine of the trials. That is, Al Rashoud et al.<sup>31</sup>, Bülow et al.<sup>20</sup>, Tascioglu et al.<sup>40</sup> and Bagheri et al.<sup>23</sup> applied too few (< 4) Joules per treatment spot with 830 nm wavelength, Jensen et al.<sup>21</sup>, Nivbrant et al.<sup>19</sup> and Hinman et al.<sup>41</sup> applied too few (< 1) Joules per treatment spot with 904 nm wavelength and Youssef et al.<sup>42</sup> (one group) and Rayegani et al.<sup>43</sup> used continuous laser with too long of a wavelength (880 nm) (table 2). No adverse event was reported by any of the trial authors. None of the authors stated receiving funding from the laser industry (supplementary material).

Table 1 | Characteristics of the included trials

| First author                        | Intervention group at baseline                                                        | Control group at baseline                                                             | Intervention vs control programme                                                                                                             | Outcome scales, week of reassessment                                                            |
|-------------------------------------|---------------------------------------------------------------------------------------|---------------------------------------------------------------------------------------|-----------------------------------------------------------------------------------------------------------------------------------------------|-------------------------------------------------------------------------------------------------|
| Al Rashoud 2014 <sup>31</sup>       | N: 26<br>Women: 62%<br>Age: 52 years<br>BMI: 38<br>VAS pain: 64 mm<br>K/L: -          | N: 23<br>Women: 65%<br>Age: 56 years<br>BMI: 37.1<br>VAS pain: 59 mm<br>K/L: -        | 3 weeks of exercise therapy, advice and LLLT vs 3 weeks of exercise therapy, advice and sham LLLT                                             | Pain: VAS (movement)<br>Disability: SKFS<br>QoL: -<br>Week of assessment: 2, 3, 9, 29           |
| Alfredo 2011/2018 <sup>29, 44</sup> | N: 24<br>Women: 75%<br>Age: 61.15 years<br>BMI: 30.16<br>VAS pain: 53.2 mm<br>K/L: 3  | N: 22<br>Women: 80%<br>Age: 62.25 years<br>BMI: 29.21<br>VAS pain: 35.4 mm<br>K/L: 2  | 3 weeks of LLLT followed by 8 weeks of exercise therapy vs 3 weeks of sham LLLT followed by 8 weeks of exercise therapy                       | Pain: WOMAC<br>Disability: WOMAC<br>QoL: -<br>Week of assessment: 3, 11, 24, 37                 |
| Alghadir 2014 <sup>32</sup>         | N: 20<br>Women: 50%<br>Age: 55.2 years<br>BMI: 32.34<br>VAS pain: 74.5 mm<br>K/L: 2   | N: 20<br>Women: 40%<br>Age: 57 years<br>BMI: 33.09<br>VAS pain: 75.5 mm<br>K/L: 2     | 4 weeks of exercise therapy, heat packs and LLLT vs 4 weeks of exercise therapy, heat packs and sham LLLT                                     | Pain: WOMAC<br>Disability: WOMAC<br>QoL: -<br>Week of assessment: 4                             |
| Bagheri 2011 <sup>23</sup>          | N: 18<br>Women: 83.13%<br>Age: 58.32 years<br>BMI: 28.87<br>VAS pain: 67 mm<br>K/L: - | N: 18<br>Women: 83.13%<br>Age: 56.14 years<br>BMI: 27.66<br>VAS pain: 59 mm<br>K/L: - | 5 weeks of exercise therapy, therapeutic ultrasound, TENS and LLLT vs 5 weeks of exercise therapy, therapeutic ultrasound, TENS and sham LLLT | Pain: WOMAC (VAS) 0-100<br>Disability: WOMAC<br>QoL: -<br>Week of assessment: 5                 |
| Bülow 1994 <sup>20</sup>            | N: 14<br>Women: -<br>Age: -<br>BMI: -<br>VAS pain: 65.08 mm<br>K/L: -                 | N: 15<br>Women: -<br>Age: -<br>BMI: -<br>VAS pain: 56.35 mm<br>K/L: -                 | 3 weeks of LLLT vs 3 weeks of sham LLLT                                                                                                       | Pain: 0-121 Likert scale (movement/rest)<br>Disability: -<br>QoL: -<br>Week of assessment: 3, 6 |
| Delkhosh 2018 <sup>39</sup>         | N: 15<br>Women: 100%<br>Age: 55.9 years<br>BMI: 26.5<br>VAS pain: 57 mm<br>K/L: -     | N: 15<br>Women: 100%<br>Age: 58.3 years<br>BMI: 27.8<br>VAS pain: 45 mm<br>K/L: -     | 2 weeks of exercise therapy, therapeutic ultrasound, TENS and LLLT vs 2 weeks of exercise therapy, therapeutic ultrasound, TENS and sham LLLT | Pain: VAS<br>Disability: WOMAC<br>QoL: -<br>Week of assessment: 2, 8                            |
| Fukuda 2011 <sup>30</sup>           | N: 25<br>Women: 80%<br>Age: 63 years<br>BMI: 30<br>VAS pain: 61 mm<br>K/L: 2          | N: 22<br>Women: 64%<br>Age: 63 years<br>BMI: 30<br>VAS pain: 62 mm<br>K/L: 2          | 3 weeks of LLLT vs 3 weeks of sham LLLT                                                                                                       | Pain: VNPS (movement)<br>Disability: Lequesne<br>QoL: -<br>Week of assessment: 3                |
| Gur 2003 <sup>33</sup> (1.5 Joules) | N: 30<br>Women: 83.3%<br>Age: 58.64 years<br>BMI: 31.17<br>VAS pain: 73.2 mm          | N: 30<br>Women: 80%<br>Age: 60.52 years<br>BMI: 30.27<br>VAS pain: 67.4 mm            | 14 weeks of exercise and 2 weeks of LLLT vs 14 weeks of exercise and 2 weeks of sham LLLT                                                     | Pain: VAS (movement)<br>Disability: -<br>QoL: -<br>Week of assessment: 6, 10, 14                |

|                                   |                                                                                        |                                                                                        |                                                                                               |                                                                                                 |
|-----------------------------------|----------------------------------------------------------------------------------------|----------------------------------------------------------------------------------------|-----------------------------------------------------------------------------------------------|-------------------------------------------------------------------------------------------------|
|                                   | K/L: 2                                                                                 | K/L: 2                                                                                 |                                                                                               |                                                                                                 |
| Gur 2003 <sup>33</sup> (1 Joules) | N: 30<br>Women: 76.7%<br>Age: 59.8 years<br>BMI: 28.49<br>VAS pain: 74.4 mm<br>K/L: 2  | N: 30<br>Women: 80%<br>Age: 60.52 years<br>BMI: 30.27<br>VAS pain: 67.4 mm<br>K/L: 2   | 14 weeks of exercise and 2 weeks of LLLT vs 14 weeks of exercise and 2 weeks of sham LLLT     | Pain: VAS (movement)<br>Disability: -<br>QoL: -<br>Week of assessment: 6, 10, 14                |
| Gur and Oktayoglu                 | N: 40<br>Women: 75%<br>Age: 58.2 years<br>BMI: 29.11<br>VAS pain: 88 mm<br>K/L: 3      | N: 40<br>Women: 72.5%<br>Age: 58.26 years<br>BMI: 30.11<br>VAS pain: 92 mm<br>K/L: 3   | 14 weeks of exercise and 2 weeks of LLLT vs 14 weeks of exercise and 2 weeks of sham LLLT     | Pain: VAS (movement)<br>Disability: -<br>QoL: -<br>Week of assessment: 6, 10, 14                |
| Gworys 2012 <sup>18</sup>         | N: 34<br>Women: -<br>Age: 57.6<br>BMI: -<br>VAS pain: 54 mm<br>K/L: -                  | N: 31<br>Women: -<br>Age: 67.7<br>BMI: -<br>VAS pain: -<br>K/L: -                      | 2 weeks of LLLT vs 2 weeks of sham LLLT                                                       | Pain: VAS<br>Disability: Lequesne<br>QoL: -<br>Week of assessment: 2                            |
| Hegedus 2009 <sup>45</sup>        | N: 18<br>Women: -<br>Age: -<br>BMI: -<br>VAS pain: 57.5 mm<br>K/L: 2                   | N: 17<br>Women: -<br>Age: -<br>BMI: -<br>VAS pain: 56.2 mm<br>K/L: 2                   | 4 weeks of LLLT vs 4 weeks of sham LLLT                                                       | Pain: VAS<br>Disability: -<br>QoL: -<br>Week of assessment: 4, 6, 12                            |
| Helianthi 2016 <sup>46</sup>      | N: 30<br>Women: 60%<br>Age: 69 years<br>BMI: 25.8<br>VAS pain: 60.2 mm<br>K/L: 3       | N: 29<br>Women: 82.8%<br>Age: 68 years<br>BMI: 26.3<br>VAS pain: 54.1 mm<br>K/L: 3     | 5 weeks of LLLT vs 5 weeks of sham LLLT                                                       | Pain: VAS (movement)<br>Disability: Lequesne<br>QoL: -<br>Week of assessment: 2, 5, 7           |
| Hinman 2014 <sup>41</sup>         | N: 71<br>Women: 39%<br>Age: 63.4 years<br>BMI: 30.7<br>VAS pain: 41.5 mm<br>K/L: -     | N: 70<br>Women: 56%<br>Age: 63.8 years<br>BMI: 28.8<br>VAS pain: 43 mm<br>K/L: -       | 12 weeks of LLLT vs 12 weeks of sham LLLT                                                     | Pain: WOMAC<br>Disability: WOMAC<br>QoL: AQoL-6D<br>Week of assessment: 12, 52                  |
| Jensen 1987 <sup>21</sup>         | N: 13<br>Women: -<br>Age: -<br>BMI: -<br>VAS pain: 67 mm<br>K/L: -                     | N: 16<br>Women: -<br>Age: -<br>BMI: -<br>VAS pain: 72.6 mm<br>K/L: -                   | 1 week of LLLT vs 1 week of sham LLLT                                                         | Pain: 0-21 (movement)<br>Disability: -<br>QoL: -<br>Week of assessment: 1                       |
| Kheshie 2014 <sup>47</sup>        | N: 18<br>Women: 0%<br>Age: 56.56 years<br>BMI: 28.62<br>VAS pain: 76.8 mm<br>K/L: 2.5  | N: 15<br>Women: 0%<br>Age: 55.6 years<br>BMI: 28.51<br>VAS pain: 78.7 mm<br>K/L: 2.5   | 6 weeks of exercise and LLLT vs 6 weeks of exercise and sham LLLT                             | Pain: WOMAC<br>Disability: WOMAC<br>QoL: -<br>Week of assessment: 6                             |
| Koutenaie 2017 <sup>48</sup>      | N: 20<br>Women: 85%<br>Age: 52.3 years<br>BMI: 28.4<br>VAS pain: 74 mm<br>K/L: 3       | N: 20<br>Women: 80%<br>Age: 53 years<br>BMI: 28.6<br>VAS pain: 65.5 mm<br>K/L: 3       | 2 weeks of exercise and LLLT vs 2 weeks of exercise and sham LLLT                             | Pain: VAS (movement)<br>Disability: -<br>QoL: -<br>Week of assessment: 2, 4                     |
| Mohammed 2018 <sup>49</sup>       | N: 20<br>Women: 85%<br>Age: 55.25 years<br>BMI: $\geq 25$<br>VAS pain: 70 mm<br>K/L: 2 | N: 20<br>Women: 85%<br>Age: 50.11 years<br>BMI: $\geq 25$<br>VAS pain: 80 mm<br>K/L: 2 | 4 weeks of LLLT vs 4 weeks of sham LLLT                                                       | Pain: VAS<br>Disability: -<br>QoL: -<br>Week of assessment: 4                                   |
| Nambi 2016 <sup>50</sup>          | N: 17<br>Women: -<br>Age: 58<br>BMI: 26.9<br>VAS pain: 78 mm<br>K/L: 3.1               | N: 17<br>Women: -<br>Age: 60<br>BMI: 28.3<br>VAS pain: 76 mm<br>K/L: 3.2               | 4 weeks of exercise, kinesio tape and LLLT vs 4 weeks of exercise, kinesio tape and sham LLLT | Pain: VAS<br>Disability: -<br>QoL: -<br>Week of assessment: 4, 8                                |
| Nivbrant 1992 <sup>19</sup>       | N: 15<br>Women: 69.2%<br>Age: 69 years<br>BMI: -<br>VAS pain: 67 mm                    | N: 15<br>Women: 84.6%<br>Age: 66 years<br>BMI: -<br>VAS pain: 58 mm                    | 2 weeks of LLLT vs 2 weeks of sham LLLT                                                       | Pain: VAS (movement)<br>Disability: Walking disability<br>QoL: -<br>Week of assessment: 2, 3, 6 |

|                                           |                                                                                             |                                                                                             |                                                                   |                                                                                |
|-------------------------------------------|---------------------------------------------------------------------------------------------|---------------------------------------------------------------------------------------------|-------------------------------------------------------------------|--------------------------------------------------------------------------------|
| Rayegani 2012 <sup>43</sup>               | K/L: -<br>N: 12<br>Women: 83.3%<br>Age: 61.7 years<br>BMI: -<br>VAS pain: 63 mm<br>K/L: < 4 | K/L: -<br>N: 13<br>Women: 92.3%<br>Age: 61.2 years<br>BMI: -<br>VAS pain: 52 mm<br>K/L: < 4 | 2 weeks of LLLT vs 2 weeks of sham LLLT                           | Pain: WOMAC<br>Disability: WOMAC<br>QoL: -<br>Week of assessment: <b>6, 14</b> |
| Tascioglu 2004 <sup>40</sup> (3 Joules)   | N: 20<br>Women: 70%<br>Age: 62.86 years<br>BMI: 27.56<br>VAS pain: 68 mm<br>K/L: 2          | N: 20<br>Women: 65%<br>Age: 64.27 years<br>BMI: 29.56<br>VAS pain: 63.88 mm<br>K/L: 2       | 10 days of LLLT vs 10 days of sham LLLT                           | Pain: WOMAC<br>Disability: WOMAC<br>QoL: -<br>Week of assessment: <b>3, 26</b> |
| Tascioglu 2004 <sup>40</sup> (1.5 Joules) | N: 20<br>Women: 75%<br>Age: 59.92 years<br>BMI: 28.63<br>VAS pain: 65.72 mm<br>K/L: 2.5     | N: 20<br>Women: 65%<br>Age: 64.27 years<br>BMI: 29.56<br>VAS pain: 63.88 mm<br>K/L: 2       | 10 days of LLLT vs 10 days of sham LLLT                           | Pain: WOMAC<br>Disability: WOMAC<br>QoL: -<br>Week of assessment: <b>3, 26</b> |
| Youssef 2016 <sup>42</sup> (904 nm)       | N: 18<br>Women: 66.7%<br>Age: 67.5<br>BMI: < 40<br>VAS pain: 51.67 mm<br>K/L: 2             | N: 15<br>Women: 66.7%<br>Age: 66.3 years<br>BMI: < 40<br>VAS pain: 50 mm<br>K/L: 2          | 8 weeks of exercise and LLLT vs 8 weeks of exercise and sham LLLT | Pain: WOMAC<br>Disability: WOMAC<br>QoL: -<br>Week of assessment: <b>8</b>     |
| Youssef 2016 <sup>42</sup> (880 nm)       | N: 18<br>Women: 61.1%<br>Age: 67.3<br>BMI: < 40<br>VAS pain: 52.50 mm<br>K/L: 2             | N: 15<br>Women: 66.7%<br>Age: 66.3 years<br>BMI: < 40<br>VAS pain: 50 mm<br>K/L: 2          | 8 weeks of exercise and LLLT vs 8 weeks of exercise and sham LLLT | Pain: WOMAC<br>Disability: WOMAC<br>QoL: -<br>Week of assessment: <b>8</b>     |

The values for age and BMI are means and the values for K/L grade are medians. Baseline VAS scores have been extracted or estimated as described in the method section. Week of assessment in bold denotes time point used for the main meta-analyses.

AQoL-6D = Assessment of Quality of Life 6 Dimensions; BMI = Body Mass Index; DIQ = Disability Index Questionnaire; K/L = Kellgren/Lawrence; LLLT = Low-Level Laser Therapy; NRS = Numeric Rating Scale; QoL = Quality of life; SKFS = Saudi Knee Function Scale; TENS = Transcutaneous Electrical Nerve Stimulation; VAS = Visual Analogue Scale; VNPS = Visual Numerical Pain Scale; WOMAC = Western Ontario and McMaster Universities Osteoarthritis Index.

**Table 2 | Laser therapy characteristics of the included trials**

| First author                         | Treated area                                                         | Wave-length (nm) | Joules per treatment spot | Mean output (mW) | Seconds per treated spot | Number of spots treated | Sessions/sessions per week |
|--------------------------------------|----------------------------------------------------------------------|------------------|---------------------------|------------------|--------------------------|-------------------------|----------------------------|
| Al Rashoud 2014 <sup>31*</sup>       | Knee joint line (medial and lateral) and acupoints (SP9, SP10, ST36) | 830              | 1.2                       | 30               | 40                       | 5                       | 9/3                        |
| Alfredo 2011, 2018 <sup>29, 44</sup> | Knee joint line (medial and lateral)                                 | 904              | 3                         | 60               | 50                       | 9                       | 9/3                        |
| Alghadir 2014 <sup>32</sup>          | Knee condyles, joint line (medial and lateral) and popliteal fossa   | 850              | 6                         | 100              | 60                       | 8                       | 8/2                        |
| Bagheri 2011 <sup>23*</sup>          | Knee joint line                                                      | 830              | 3                         | 30               | 100                      | 10                      | 10/5                       |
| Bülow 1994 <sup>20*</sup>            | Painful spots in 0-10 cm radius of the knee joint line               | 830              | 1.5-4.5                   | 25               | 60-180                   | 5-15                    | 9/3                        |
| Delkhosh 2018 <sup>39</sup>          | Knee joint                                                           | 830              | 5                         | 30               | 167                      | 5                       | 10/5                       |
| Fukuda 2011 <sup>30</sup>            | Front knee capsule                                                   | 904              | 3                         | 60               | 50                       | 9                       | 9/3                        |
| Gur 2003 <sup>33</sup> (1.5 Joules)  | Antero-lateral and antero-medial portal of the knee                  | 904              | 1.5                       | 10               | 150                      | 2                       | 10/2                       |
| Gur 2003 <sup>33</sup> (1 Joules)    | Antero-lateral and antero-medial portal of the knee                  | 904              | 1                         | 11.2             | 90                       | 2                       | 10/2                       |
| Gur and Oktayoglu                    | Antero-lateral and antero-medial portal of the knee                  | 904              | 1.5                       | 10               | 150                      | 2                       | 10/2                       |
| Gworys 2012 <sup>18</sup>            | Knee joint line, patellofemoral joint and popliteal fossa            | 810              | 8                         | 400              | 20                       | 12                      | 10/2                       |
| Hegedus 2009 <sup>45</sup>           | Knee joint line, popliteal fossa and condyles                        | 830              | 6                         | 50               | 120                      | 8                       | 8/2                        |
| Helianthi 2016 <sup>46</sup>         | Knee joint line (lateral) and acupoints (ST36, SP9, GB34, EX-LE-4)   | 785              | 4                         | 50               | 80                       | 5                       | 10/2                       |



|                                            |                                                                        |     |       |     |     |   |             |
|--------------------------------------------|------------------------------------------------------------------------|-----|-------|-----|-----|---|-------------|
| Hinman 2014 <sup>41*</sup>                 | Acupoints (locations not stated)                                       | 904 | 0.2   | 10  | 20  | 6 | 8-12/0.67-1 |
| Jensen 1987 <sup>21*</sup>                 | Knee joint line (medial and lateral), apex and basis of patellae       | 904 | 0.054 | 0.3 | 180 | 4 | 5/5         |
| Kheshie 2014 <sup>47#</sup>                | Front knee                                                             | 830 | -     | 160 | -   | - | 12/2        |
| Koutenaeci 2017 <sup>48</sup>              | Front knee, popliteal fossa and femur condyles in the popliteal cavity | 810 | 7     | 100 | 70  | 8 | 10/5        |
| Mohammed 2018 <sup>49</sup>                | Knee joint line (lateral) and acupoints (ST36, Sp10, GB, ashi)         | 808 | 5.4   | 90  | 60  | 7 | 12/3        |
| Nambi 2016 <sup>50</sup>                   | Knee joint line, condyles and popliteal fossa                          | 904 | 1.5   | 25  | 60  | 8 | 12/4        |
| Nivbrant 1992 <sup>19*</sup>               | Knee joint line (medial and lateral) and acupoints (ST34, SP10, X32)   | 904 | 0.72  | 4   | 180 | 7 | 6/3         |
| Rayegani 2012 <sup>43*</sup>               | Knee joint line and popliteal fossa                                    | 880 | 6     | 50  | 120 | 8 | 10/5        |
| Tascioglu 2004 <sup>40</sup> (3 Joules)*   | Painful spots on the knee                                              | 830 | 3     | 50  | 60  | 5 | 10/5        |
| Tascioglu 2004 <sup>40</sup> (1.5 Joules)* | Painful spots on the knee                                              | 830 | 1.5   | 50  | 30  | 5 | 10/5        |
| Youssef 2016 <sup>42</sup> (904 nm)        | Knee joint line (medial and lateral)                                   | 904 | 3     | 60  | 50  | 9 | 16/2        |
| Youssef 2016 <sup>42</sup> (880 nm)*       | Knee joint line (medial and lateral), epicondyles and popliteal fossa  | 880 | 6     | 50  | 120 | 8 | 16/2        |

\* Non-recommended Low-Level Laser Therapy dose; # 1250 Joules per session.

Overall, pain was significantly reduced by LLLT compared to the placebo-control at the end of therapy (14.23 mm VAS [95% CI: 7.31 to 21.14];  $I^2 = 93%$ ;  $N = 816$ ) (figure 2) and during follow-ups 2-12 weeks later (15.92 mm VAS [95% CI: 6.47 to 25.37];  $I^2 = 93%$ ;  $N = 581$ ) (figure 3). The dose subgroup analyses demonstrated that pain was significantly reduced by the recommended LLLT doses compared to placebo at the end of therapy (18.71 mm [95% CI: 9.42 to 27.99];  $I^2 = 95%$ ;  $N = 480$ ) (figure 2) and during follow-ups 2-12 weeks later (23.23 mm VAS [95% CI: 10.60 to 35.86];  $I^2 = 95%$ ;  $N = 392$ ) (figure 3). The dose subgroup analyses demonstrated that pain was significantly reduced by the non-recommended LLLT doses compared to placebo at the end of therapy (6.34 mm VAS [95% CI: 1.26 to 11.41];  $I^2 = 44%$ ;  $N = 336$ ) (figure 2), but the difference during follow-ups 2-12 weeks later was not significant (6.20 mm VAS [95% CI: -0.65 to 13.05];  $I^2 = 38%$ ;  $N = 189$ ) (figure 3). The between-subgroup differences (recommended versus non-recommended doses) in pain results were significantly in favour of the recommended LLLT doses regarding both time points ( $P = 0.02$  and  $0.02$ ) (figure 2-3).

Overall, disability was significantly reduced by LLLT compared to placebo at the end of therapy (SMD = 0.59 [95% CI: 0.33 to 0.86];  $I^2 = 57%$ ;  $N = 617$ ) (figure 4) and during follow-ups 2-12 weeks later (SMD = 0.66 [95% CI: 0.23 to 1.09];  $I^2 = 67%$ ;  $N = 289$ ) (figure 5). The dose subgroup analyses demonstrated that disability was significantly reduced by the recommended LLLT doses compared to placebo at the end of therapy (SMD = 0.75 [95% CI: 0.46 to 1.03];  $I^2 = 34%$ ;  $N = 339$ ) (figure 4) and during follow-ups 2-8 weeks later (SMD = 1.31 [95% CI: 0.92 to 1.69];  $I^2 = 0%$ ;  $N = 129$ ) (figure 5). The dose subgroup analyses demonstrated that disability was neither significantly reduced by the non-recommended LLLT doses compared to placebo at the end of therapy (SMD = 0.36 [95% CI: -0.02 to 0.73];  $I^2 = 49%$ ;  $N = 278$ ) (figure 4) nor during follow-ups 2-12 weeks later (SMD = 0.26 [95% CI: -0.06 to 0.58];  $I^2 = 0%$ ;  $N = 160$ ) (figure 5). The between-subgroup differences in disability results were in favour of the recommended LLLT doses over the non-recommended LLLT doses but only significantly regarding one of two time points ( $P = 0.11$  and  $< 0.0001$ ) (figure 4-5).

No QoL meta-analysis was performed because this outcome was only assessed in a single trial, i.e., by Hinman et al. who applied a non-recommended LLLT dose and reported insignificant results.<sup>41</sup> The funnel plots indicated that there was no publication bias (supplementary material). We additionally checked for small study bias by reducing the statistical weight of the smallest studies



through a change from random to fixed effects models and this led to similar mean effect estimates, indicating that there was no small study bias (supplementary material).<sup>35</sup>

Methodological quality of the included trials was judged adequate (low risk of bias), unclear (unclear risk of bias) and inadequate (high risk of bias) in 75%, 19% and 6% instances, respectively. Risk of detection bias and reporting bias appeared low in all the trials. There was a lack of information regarding random sequence generation in five trials, allocation concealment in twelve trials, blinding of therapist in four trials and incomplete outcome data in four trials. Therapist blinding was inadequate in seven trials and there was an inadequate handling of data in a single trial (figure 6). However, risk of bias subgroup-analyses conducted post hoc revealed that there was no statistically significant interaction between the effect estimates and risk of bias, and the analyses did not display a drop in statistical heterogeneity (supplementary material). Support for our risk of bias judgments is available (supplementary material).

Neither did the levels of statistical heterogeneity change when we switched from the MD to the SMD method post hoc (supplementary material).

Post hoc analyses demonstrated that LLLT was significantly superior to placebo both with exercise therapy ( $P = 0.0009$  for pain and  $P < 0.0001$  for disability) and without exercise therapy ( $P = 0.01$  for pain and  $P = 0.008$  for disability) as co-intervention (supplementary material).

Post hoc analyses were performed to more precisely estimate the pain time-effect profile for the recommended LLLT doses by imputing the results of the trials with these doses in subgroups with narrower time intervals. Pain was significantly reduced by the recommended LLLT doses compared to placebo immediately after therapy week 2-3 and 4-8 and at follow-ups 2-4, 6-8 and 12 weeks later; the peak point was 2-4 weeks after the end of therapy (31.87 mm VAS beyond placebo [95% CI: 18.18 to 45.56];  $I^2 = 93%$ ;  $N = 322$ ). The 21- and 34-weeks follow-up pain results were not statistically significant (figure 7 and supplementary material). The statistical heterogeneity in the main pain analyses of the recommended LLLT doses was high ( $I^2 = 95%$ ) (figure 2-3) but the mean statistical heterogeneity of the six subgroups covering the same time period was only moderate ( $I^2 = 58%$ ) (figure 7 and supplementary material).

Figure 2 | Pain results from immediately after the end of therapy

Figure 3 | Pain results from follow-ups 2-12 weeks after the end of therapy

Figure 4 | Disability results from immediately after the end of therapy

Figure 5 | Disability results from follow-ups 2-12 weeks after the end of therapy

Figure 6 | Risk of bias plot of the included trials

The trials are ranked by mean pain effect estimates, i.e., more laser positive results in the bottom of the figure; the plot is based on the results from the main pain analyses (immediately after the end of therapy, primarily). Support for our judgements and risk of bias statistical analyses are available (supplementary material).

Figure 7 | Pain time-effect profile (recommended LLLT doses versus placebo-control)

Values on the y-axis are mm VAS pain results. Positive VAS score indicates the recommended LLLT doses are superior to the placebo-control. The related forest plot is available (supplementary material).

LLLT = Low-Level Laser Therapy; VAS = Visual Analogue Scale.

\*\* The recommended LLLT doses are highly statistically significantly superior to placebo ( $P \leq 0.01$ ).

## Discussion

Our meta-analyses showed that pain and disability were significantly reduced by LLLT compared to placebo. We sub-grouped the included trials according to the WALT recommendations (2010)

1  
2  
3  
4 for laser dose per treatment spot, and this revealed a significant dose-response relationship. Our  
5 principal finding is that the recommended LLLT doses offers clinically relevant pain relief in KOA.  
6 The non-recommended LLLT doses provided no or little positive effect.

7  
8 The absolute Minimally Clinically Important Improvement (MCII) of pain in KOA has been  
9 estimated to be 19.9, 17 and 9 units on a 0-100 scale in 2005, 2012 and 2015, respectively.<sup>51-53</sup> It is  
10 important to note that the MCII of pain is a within-subject improvement and depends on baseline  
11 pain intensity.<sup>51-53</sup> The pain reduction from the recommended LLLT doses was significantly  
12 superior to placebo even at follow-ups 12 weeks after the end of therapy, and the difference was  
13 greater than 20 mm VAS from the final 4-8 weeks of therapy through follow-ups 6-8 weeks after  
14 the end of therapy. Interestingly, the pain reduction from the recommended LLLT doses peaked at  
15 follow-ups 2-4 weeks after the end of therapy (31.87 mm VAS highly significantly beyond  
16 placebo).

17  
18 Disability was also significantly reduced by the recommended LLLT doses compared to placebo,  
19 i.e., to a moderate extent at the end of therapy (SMD = 0.75) and to a large extent during follow-ups  
20 2-8 weeks later (SMD = 1.31). More trials with disability assessments are needed to precisely  
21 estimate the effect of LLLT on this outcome during follow-up.

22  
23 Furthermore, our analyses demonstrated that LLLT is effective in KOA both with and without  
24 exercise therapy as co-intervention. Strength training was seemingly only used as an adjunct to  
25 LLLT in two of the included trials<sup>47 50</sup>, and thus more trials with this combination of treatments are  
26 needed.

27  
28 Risk of bias of the included trials appeared insignificant and could not explain the statistical  
29 heterogeneity (supplementary material). We find it plausible that some of the statistical  
30 heterogeneity of the overall analyses is associated with the dose subgroup criteria (wavelength  
31 specific laser doses per treatment spot) since the mean levels of statistical heterogeneity of the  
32 subgroup analyses were consistently lower than the overall levels. It is unknown to us whether other  
33 differences in the LLLT protocols impacted the results.

34  
35 The statistical heterogeneity in the main pain analyses of the recommended LLLT doses was high,  
36 and some of it can be explained by the pooling of results from various time points of assessment  
37 given the pain reduction increased and subsequent decreased with time; the pain reduction time  
38 profile showed a drop in statistical heterogeneity to a moderate level.

39  
40 According to WALT, the osteoarthritic knee should be laser irradiated to reduce inflammation and  
41 promote tissue repair.<sup>24 25 54</sup> One of the discrepancies from our review and previously published  
42 reviews of the same topic is that we omitted the RCT by Yurtkuran et al.<sup>8 17 28 55</sup>, as they solely  
43 applied laser to an acupoint located distally from the knee joint (spleen 9).

44  
45 In line with our findings and the WALT dose recommendations, Joensen et al. (2012) observed that  
46 the percentage of laser penetrating rat skin at 810 and 904 nm wavelength was 20% and 38-58%,  
47 respectively. That is, to deliver the same dose beneath the skin, 2.4 times the energy on the skin  
48 surface is required with an 810 nm laser compared to a 904 nm laser device. This may be due to the  
49 different wavelengths and/or because 904 nm laser is super-pulsed (pulse peak power  $\geq 10000$  mW  
50 typically), whereas shorter wavelength laser is delivered continuously or with less intense  
51 pulsation.<sup>26</sup> The estimated median dose applied with the recommended LLLT was six and three  
52 Joules per treatment spot with 785-860 and 904 nm wavelength laser, respectively. Most of the trial  
53 authors reported LLLT parameters in detail but did not state whether the laser devices were  
54 calibrated. Therefore, in the LLLT trials with non-significant effect estimates, equipment failure  
55 cannot be ruled out.

56  
57 It is important to note that no adverse events were reported by any of the trial authors and the  
58 dropout rate was minor, indicating that LLLT is harmless.

Our clinical findings that the effect of LLLT progresses over time is in line with in vivo results of Wang et al.<sup>12</sup> The positive effect from LLLT seems to last longer than those of widely recommended painkiller drugs.<sup>56</sup> The effect of using the NSAID tiaprofenic acid, for example, is probably gone within a week, unless the treatment is continued.<sup>56</sup> Future trials should investigate whether booster sessions of LLLT can prolong the positive effect. Comparative cost-effectiveness analyses of LLLT and NSAIDs would also be of great interest.

### Strengths and limitations of this study

In contrast to previous reviews on the current topic, our review was conducted in conformance with an a priori published protocol<sup>8 17 28</sup>, which included a detailed plan for statistical analysis (e.g. laser dose subgroup criteria). Furthermore, this is the first review on this topic without language restrictions<sup>8 17 28</sup>, and this expansion proved important since four (18%) of the included trials were reported in non-English language.<sup>19 21 23 39</sup>

We conducted a series of meta-analyses illustrating the effect of LLLT on pain over time. To ensure high reproducibility of the meta-analyses, three persons each independently extracted the outcome data from the included trial articles.

This review is not without limitations. It lacks QoL analyses, a detailed disability time-effect analysis and direct comparisons between LLLT and other interventions.

### Conclusions

LLLT reduces pain and disability in KOA at 4-8 Joules with 785-860 nm wavelength and at 1-3 Joules with 904 nm wavelength per treatment spot.

**Contributors:** MBS, JMB and HL wrote the PROSPERO protocol. MBS and JMB selected the trials, with the involvement of IFN when necessary. MBS and JJ judged the risk of bias, with the involvement of IFN when necessary. MBS and IFN did the translations. MBS, JMB and KVF extracted the data. MBS performed the analyses, under supervision of JMB. All the authors participated in interpreting of the results. MBS drafted the first version of the manuscript, and subsequently revised it, based on comments by RABLM, HS and all the other authors. All the authors read and accepted the final version of the manuscript.

**Funding:** The University of Bergen funded this research. No specific grant from any funding agency in the public, commercial or not-for-profit sectors was received for this work. The corresponding author had full access to all data in the study and had the final responsibility for the decision to submit for publication.

**Competing interests:** JMB and RABLM are post-presidents and former board members of World Association for Laser Therapy, a non-for-profit research organization from which they have never received funding, grants or fees. The other authors declared that they had no conflict of interests related to this work.

**Ethical approval:** Not required.

**Data sharing:** The dataset for meta-analysis is available from the corresponding author upon reasonable request. The corresponding author affirms that the manuscript is an honest, accurate and transparent account of the study being reported; that no important aspects of the study have been omitted; and that any discrepancies from the study as planned (and, if relevant, registered) have been explained.

1. Heidari B. Knee osteoarthritis prevalence, risk factors, pathogenesis and features - Part 1. *Caspian J Intern Med* 2011;2:205-12.
2. Berenbaum F. Osteoarthritis as an inflammatory disease (osteoarthritis is not osteoarthrosis!). *Osteoarthritis cartilage / OARS, Osteoarthritis Research Society* 2013;21:16-21. doi: 10.1016/j.joca.2012.11.012
3. Bartels EM, Juhl CB, Christensen R, et al. Aquatic exercise for the treatment of knee and hip osteoarthritis. *Cochrane Database Syst Rev* 2016;3:CD005523. doi: 10.1002/14651858.CD005523.pub3
4. Juhl C, Christensen R, Roos EM, et al. Impact of exercise type and dose on pain and disability in knee osteoarthritis: A systematic review and meta-regression analysis of randomized controlled trials. *Arthritis Rheumatol* 2014;66:622-36. doi: 10.1002/art.38290

5. Rannou F, Pelletier JP, Martel-Pelletier J. Efficacy and safety of oral NSAIDs and analgesics in the management of osteoarthritis: Evidence from real-life setting trials and surveys. *Semin Arthritis Rheum* 2016;45:22-7. doi: 10.1016/j.semarthrit.2015.11.009 [published Online First: 2016/01/26]
6. Bannuru RR, Schmid CH, Kent DM, et al. Comparative effectiveness of pharmacologic interventions for knee osteoarthritis: A systematic review and network meta-analysis. *Ann Intern Med* 2015;162:46-54. doi: 10.7326/m14-1231 [published Online First: 2015/01/07]
7. Bjordal JM, Ljunggren AE, Klovning A, et al. Non-steroidal anti-inflammatory drugs, including cyclo-oxygenase-2 inhibitors, in osteoarthritic knee pain: meta-analysis of randomised placebo controlled trials. *Bmj* 2004;329(7478):1317. doi: 10.1136/bmj.38273.626655.63 [published Online First: 2004/11/25]
8. Rayegani SM, Raeissadat SA, Heidari S, et al. Safety and effectiveness of low-level laser therapy in patients with knee osteoarthritis: A systematic review and meta-analysis. *J Lasers Med Sci* 2017;8:12-19.
9. Hamblin MR. Can osteoarthritis be treated with light? *Arthritis Res Ther* 2013;15:120. doi: 10.1186/ar4354 [published Online First: 2013/11/30]
10. Tomazoni SS, Leal-Junior ECP, Pallotta RC, et al. Effects of photobiomodulation therapy, pharmacological therapy, and physical exercise as single and/or combined treatment on the inflammatory response induced by experimental osteoarthritis. *Lasers med sci* 2017;32:101-08. doi: <http://dx.doi.org/10.1007/s10103-016-2091-8>
11. Tomazoni SS, Leal-Junior EC, Frigo L, et al. Isolated and combined effects of photobiomodulation therapy, topical nonsteroidal anti-inflammatory drugs, and physical activity in the treatment of osteoarthritis induced by papain. *J Biomed Opt* 2016;21 doi: 10.1117/1.JBO.21.10.108001 [published Online First: 2016/10/19]
12. Wang P, Liu C, Yang X, et al. Effects of low-level laser therapy on joint pain, synovitis, anabolic, and catabolic factors in a progressive osteoarthritis rabbit model. *Lasers med sci* 2014;29:1875-85. doi: 10.1007/s10103-014-1600-x [published Online First: 2014/06/04]
13. Assis L, Almeida T, Milares LP, et al. Musculoskeletal Atrophy in an Experimental Model of Knee Osteoarthritis: The Effects of Exercise Training and Low-Level Laser Therapy. *Am J Phys Med Rehabil* 2015;94:609-16. doi: 10.1097/phm.0000000000000219 [published Online First: 2014/10/10]
14. Pallotta RC, Bjordal JM, Frigo L, et al. Infrared (810-nm) low-level laser therapy on rat experimental knee inflammation. *Lasers med sci* 2012;27:71-78. doi: <http://dx.doi.org/10.1007/s10103-011-0906-1>
15. Geenen R, Overman CL, Christensen R, et al. EULAR recommendations for the health professional's approach to pain management in inflammatory arthritis and osteoarthritis. *Ann Rheum Dis* 2018;77:797-807. doi: 10.1136/annrheumdis-2017-212662
16. Collins NJ, Hart HF, Mills KAG. OARSI year in review 2018: Rehabilitation and outcomes. *Osteoarthritis cartilage / OARS, Osteoarthritis Research Society* 2018: Published online 7. dec. 2018. doi:10.1016/j.joca.2018.11.010. doi: 10.1016/j.joca.2018.11.010 [published Online First: 2018/12/12]
17. Huang Z, Chen J, Ma J, et al. Effectiveness of low-level laser therapy in patients with knee osteoarthritis: A systematic review and metaanalysis. *Osteoarthritis Cartilage* 2015;23:1437-44.
18. Gworys K, Gasztych J, Puzder A, et al. Influence of various laser therapy methods on knee joint pain and function in patients with knee osteoarthritis. *Ortop Traumatol Rehabil* 2012;14:269-77. doi: 10.5604/15093492.1002257
19. Nivbrant B, Friberg S. Laser tycks ha effekt pa knaledsartros men vetenskapligt bevis saknas [Swedish]. *Lakartidningen [Journal of the Swedish Medical Association]* 1992;89:859-61.
20. Bülow PM, Jensen H, Danneskiold-Samsøe B. Low power Ga-Al-As laser treatment of painful osteoarthritis of the knee. A double-blind placebo-controlled study. *Scand J Rehabil Med* 1994;26:155-9.
21. Jensen H, Harreby M, Kjer J. Infrarød laser -- effekt ved smertende knæartrose? [Danish]. *Ugeskr Laeger* 1987;149:3104-06.
22. Stausholm MB, Bjordal JM, Lopes-Martins RAB, et al. Methodological flaws in meta-analysis of low-level laser therapy in knee osteoarthritis: A letter to the editor. *Osteoarthritis cartilage / OARS, Osteoarthritis Research Society* 2016;25:e9-e10. doi: 10.1016/j.joca.2016.09.022 [published Online First: 2016/11/07]
23. Bagheri SR, Fatemi E, Fazeli SH, et al. Efficacy of low level laser on knee osteoarthritis treatment [Persian]. *Koomesh* 2011;12:285-92.
24. WALT. Recommended treatment doses for Low Level Laser Therapy 780-860 nm wavelength: *World Association for Laser Therapy*; 2010 [Available from: [http://waltza.co.za/wp-content/uploads/2012/08/Dose\\_table\\_780-860nm\\_for\\_Low\\_Level\\_Laser\\_Therapy\\_WALT-2010.pdf](http://waltza.co.za/wp-content/uploads/2012/08/Dose_table_780-860nm_for_Low_Level_Laser_Therapy_WALT-2010.pdf)].
25. WALT. Recommended treatment doses for Low Level Laser Therapy 904 nm wavelength: *World Association for Laser Therapy*; 2010 [Available from: [http://waltza.co.za/wp-content/uploads/2012/08/Dose\\_table\\_904nm\\_for\\_Low\\_Level\\_Laser\\_Therapy\\_WALT-2010.pdf](http://waltza.co.za/wp-content/uploads/2012/08/Dose_table_904nm_for_Low_Level_Laser_Therapy_WALT-2010.pdf)].



1  
2  
3  
4  
5  
6  
7  
8  
9  
10  
11  
12  
13  
14  
15  
16  
17  
18  
19  
20  
21  
22  
23  
24  
25  
26  
27  
28  
29  
30  
31  
32  
33  
34  
35  
36  
37  
38  
39  
40  
41  
42  
43  
44  
45  
46  
47  
48  
49  
50  
51  
52  
53  
54  
55  
56  
57  
58  
59  
60

26. Joensen J, Ovsthus K, Reed RK, et al. Skin penetration time-profiles for continuous 810 nm and Superpulsed 904 nm lasers in a rat model. *Photomed laser surg* 2012;30:688-94. doi: 10.1089/pho.2012.3306 [published Online First: 2012/10/03]
27. Moher DLAT, J.; Altman, DG. Preferred Reporting Items for Systematic Reviews and Meta-Analyses: The PRISMA Statement: *PLoS Med* 2009.
28. Bjordal JM, Johnson MI, Lopes-Martins RA, et al. Short-term efficacy of physical interventions in osteoarthritic knee pain: A systematic review and meta-analysis of randomised placebo-controlled trials. *BMC musculoskeletal disord* 2007;8:51. doi: 10.1186/1471-2474-8-51 [published Online First: 2007/06/26]
29. Alfredo PP, Bjordal JM, Dreyer SH, et al. Efficacy of low level laser therapy associated with exercises in knee osteoarthritis: A randomized double-blind study. *Clin rehabil* 2011;26:523-33. doi: 10.1177/0269215511425962 [published Online First: 2011/12/16]
30. Fukuda VO, Fukuda TY, Guimaraes M, et al. Short-term efficacy of low-level laser therapy in patients with knee osteoarthritis: A randomized placebo-controlled, double-blind clinical trial. *Rev Bras Ortop* 2011;46:526-33. doi: 10.1016/s2255-4971(15)30407-9 [published Online First: 2011/09/01]
31. Al Rashoud AS, Abboud RJ, Wang W, et al. Efficacy of low-level laser therapy applied at acupuncture points in knee osteoarthritis: A randomised double-blind comparative trial. *Physiotherapy* 2014;100:242-48. doi: 10.1016/j.physio.2013.09.007
32. Alghadir A, Omar MT, Al-Askar AB, et al. Effect of low-level laser therapy in patients with chronic knee osteoarthritis: A single-blinded randomized clinical study. *Lasers med sci* 2014;29:749-55. doi: 10.1007/s10103-013-1393-3
33. Gur A, Cosut A, Sarac AJ, et al. Efficacy of different therapy regimes of low-power laser in painful osteoarthritis of the knee: A double-blind and randomized-controlled trial. *Lasers surg med* 2003;33:330-38.
34. Tunér J, Hode L. The new laser therapy handbook: A guide for research scientists, doctors, dentists, veterinarians and other interested parties within the medical field. *Grängesberg: Prima Books* 2010.
35. Higgins JPT, Green S. *Cochrane Handbook for Systematic Reviews of Interventions* 2011 [Available from: <http://handbook.cochrane.org/> accessed 3.12. 2015.
36. Juhl C, Lund H, Roos EM, et al. A hierarchy of patient-reported outcomes for meta-analysis of knee osteoarthritis trials: Empirical evidence from a survey of high impact journals. *Arthritis* 2012 doi: 10.1155/2012/136245
37. Bolognese JA, Schnitzer TJ, Ehrich EW. Response relationship of VAS and Likert scales in osteoarthritis efficacy measurement. *Osteoarthritis Cartilage* 2003;11:499-507. doi: 10.1016/s1063-4584(03)00082-7
38. Higgins JP, Thompson SG, Deeks JJ, et al. Measuring inconsistency in meta-analyses. *BMJ* 2003;327:557-60. doi: 10.1136/bmj.327.7414.557 [published Online First: 2003/09/06]
39. Delkhosh CT, Fatemy E, Ghorbani R, et al. Comparing the immediate and long-term effects of low and high power laser on the symptoms of knee osteoarthritis [Persian]. *Journal of mazandaran university of medical sciences* 2018;28(165):69-77.
40. Tascioglu F, Armagan O, Tabak Y, et al. Low power laser treatment in patients with knee osteoarthritis. *Swiss Med Wkly* 2004;134:254-8. doi: 2004/17/smw-10518 [published Online First: 2004/07/10]
41. Hinman RS, McCrory P, Pirota M, et al. Acupuncture for chronic knee pain: A randomized clinical trial. *The JAMA* 2014;312:1313-22. doi: 10.1001/jama.2014.12660
42. Youssef EF, Muaidi QI, Shanb AA. Effect of Laser Therapy on Chronic Osteoarthritis of the Knee in Older Subjects. *Lasers Med Sci* 2016;7:112-9. doi: 10.15171/jlms.2016.19 [published Online First: 2016/06/23]
43. Rayegani SM, Bahrami MH, Elyaspour D, et al. Therapeutic Effects of Low Level Laser Therapy (LLLT) in Knee Osteoarthritis, Compared to Therapeutic Ultrasound. *Lasers Med Sci* 2012;3:71-74.
44. Alfredo PP, Bjordal JM, Junior WS, et al. Long-term results of a randomized, controlled, double-blind study of low-level laser therapy before exercises in knee osteoarthritis: Laser and exercises in knee osteoarthritis. *Clin rehabil* 2018;32:173-78. doi: 10.1177/0269215517723162 [published Online First: 2017/08/05]
45. Hegedus B, Viharos L, Gervain M, et al. The effect of low-level laser in knee osteoarthritis: A double-blind, randomized, placebo-controlled trial. *Photomed laser surg* 2009;27:577-84.
46. Helianthi DR, Simadibrata C, Srilestari A, et al. Pain Reduction After Laser Acupuncture Treatment in Geriatric Patients with Knee Osteoarthritis: A Randomized Controlled Trial. *Acta Med Indones* 2016;48:114-21. [published Online First: 2016/08/24]
47. Kheshie AR, Alayat MS, Ali MM. High-intensity versus low-level laser therapy in the treatment of patients with knee osteoarthritis: A randomized controlled trial. *Lasers med sci* 2014;29:1371-6. doi: 10.1007/s10103-014-1529-0

- 1  
2  
3  
4 48. Koutenaei FR, Mosallanezhad Z, Naghikhani M, et al. The Effect of Low Level Laser Therapy on Pain and Range  
5 of Motion of Patients With Knee Osteoarthritis. *Physical Treatments - Specific Physical Therapy* 2017;7:13-18.  
6 doi: 10.29252/nrip.ptj.7.1.13  
7  
8 49. Mohammed N, Allam H, Elghoroury E, et al. Evaluation of serum beta-endorphin and substance P in knee  
9 osteoarthritis patients treated by laser acupuncture. *J Complement Integr Med* 2018;15 doi:  
10 <http://dx.doi.org/10.1515/jcim-2017-0010>  
11  
12 50. Nambi SG, Kamal W, George J, et al. Radiological and biochemical effects (CTX-II, MMP-3, 8, and 13) of low-  
13 level laser therapy (LLLT) in chronic osteoarthritis in Al-Kharj, Saudi Arabia. *Lasers Med Sci* 2016;32 doi:  
14 10.1007/s10103-016-2114-5 [published Online First: 2016/12/04]  
15  
16 51. Tubach F, Ravaud P, Baron G, et al. Evaluation of clinically relevant changes in patient reported outcomes in knee  
17 and hip osteoarthritis: The minimal clinically important improvement. *Ann Rheum Dis* 2005;64:29-33. doi:  
18 10.1136/ard.2004.022905  
19  
20 52. Bellamy N, Hochberg M, Tubach F, et al. Development of multinational definitions of minimal clinically important  
21 improvement and patient acceptable symptomatic state in osteoarthritis. *Arthritis care & research* 2015;67:972-80.  
22 doi: 10.1002/acr.22538 [published Online First: 2015/01/13]  
23  
24 53. Tubach F, Ravaud P, Martin-Mola E, et al. Minimum clinically important improvement and patient acceptable  
25 symptom state in pain and function in rheumatoid arthritis, ankylosing spondylitis, chronic back pain, hand  
26 osteoarthritis, and hip and knee osteoarthritis: Results from a prospective multinational study. *Arthritis care &*  
27 *research* 2012;64:1699-707. doi: 10.1002/acr.21747 [published Online First: 2012/06/08]  
28  
29 54. Lopes-Martins RAB, Marcos RL, Leal-Junior ECP, et al. Low-Level Laser Therapy and World Association for  
30 Laser Therapy Dosage Recommendations in Musculoskeletal Disorders and Injuries. *Photomed laser surg*  
31 2018;36:457-59. doi: 10.1089/pho.2018.4493 [published Online First: 2018/09/07]  
32  
33 55. Yurtkuran M, Alp A, Konur S, et al. Laser acupuncture in knee osteoarthritis: A double-blind, randomized  
34 controlled study. *Photomed laser surg* 2007;25:14-20. doi: 10.1089/pho.2006.1093  
35  
36 56. Scott DL, Berry H, Capell H, et al. The long-term effects of non-steroidal anti-inflammatory drugs in osteoarthritis  
37 of the knee: A randomized placebo-controlled trial. *Rheumatology (Oxford, England)* 2000;39:1095-101.  
38 [published Online First: 2000/10/18]  
39  
40  
41  
42  
43  
44  
45  
46  
47  
48  
49  
50  
51  
52  
53  
54  
55  
56  
57  
58  
59  
60



1  
2  
3  
4  
5  
6  
7  
8  
9  
10  
11  
12  
13  
14  
15  
16  
17  
18  
19  
20  
21  
22  
23  
24  
25  
26  
27  
28  
29  
30  
31  
32  
33  
34  
35  
36  
37  
38  
39  
40  
41



1  
2  
3  
4  
5  
6  
7  
8  
9  
10  
11  
12  
13  
14  
15  
16  
17  
18  
19  
20  
21  
22  
23  
24  
25  
26  
27  
28  
29  
30  
31  
32  
33  
34  
35  
36  
37  
38  
39  
40  
41  
42  
43  
44  
45  
46  
47  
48  
49  
50  
51  
52  
53  
54  
55  
56  
57  
58  
59  
60



1  
2  
3  
4  
5  
6  
7  
8  
9  
10  
11  
12  
13  
14  
15  
16  
17  
18  
19  
20  
21  
22  
23  
24  
25  
26  
27  
28  
29  
30  
31  
32  
33  
34  
35  
36  
37  
38  
39  
40  
41  
42  
43  
44  
45  
46  
47  
48  
49  
50  
51  
52  
53  
54  
55  
56  
57  
58  
59  
60

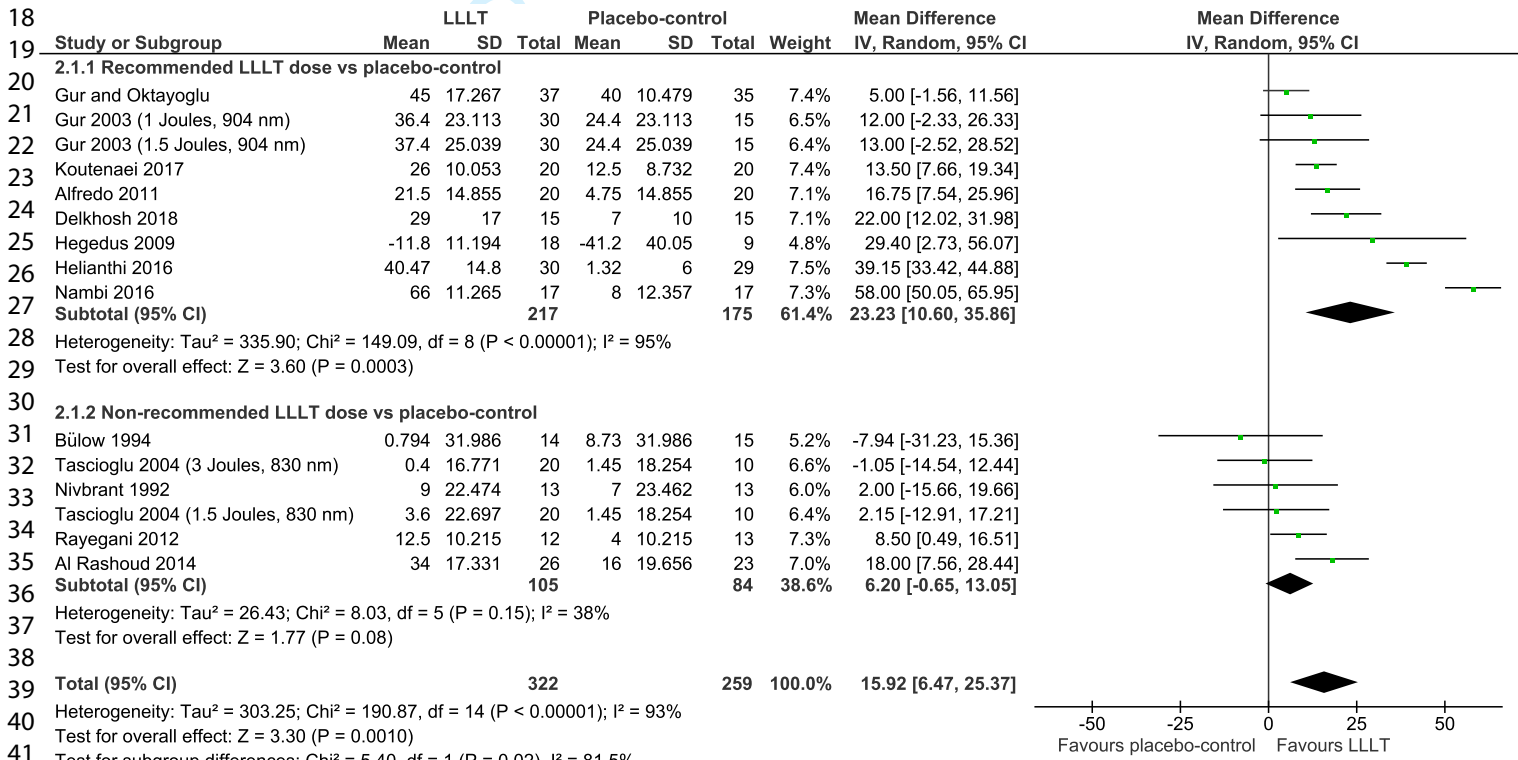

1  
2  
3  
4  
5  
6  
7  
8  
9  
10  
11  
12  
13  
14  
15  
16  
17  
18  
19  
20  
21  
22  
23  
24  
25  
26  
27  
28  
29  
30  
31  
32  
33  
34  
35  
36  
37  
38  
39  
40  
41  
42  
43  
44  
45  
46  
47  
48  
49  
50  
51  
52  
53  
54  
55  
56  
57  
58  
59  
60



1  
2  
3  
4  
5  
6  
7  
8  
9  
10  
11  
12  
13  
14  
15  
16  
17  
18  
19  
20  
21  
22  
23  
24  
25  
26  
27  
28  
29  
30  
31  
32  
33  
34  
35  
36  
37  
38  
39  
40  
41  
42  
43  
44  
45  
46  
47  
48  
49  
50  
51  
52  
53  
54  
55  
56  
57  
58  
59  
60

FOR



1111

1  
2  
3  
4  
5  
6  
7  
8  
9  
10  
11  
12  
13  
14  
15  
16  
17  
18  
19  
20  
21  
22  
23  
24  
25  
26  
27  
28  
29  
30  
31  
32  
33  
34  
35  
36  
37  
38  
39  
40  
41  
42  
43  
44  
45  
46  
47  
48  
49  
50  
51  
52  
53  
54  
55  
56  
57  
58  
59  
60

|                   | Random sequence generation (selection bias) | Allocation concealment (selection bias) | Blinding (performance bias and detection bias) | Blinding of outcome assessment (detection bias) | Incomplete outcome data (attrition bias) | Selective reporting (reporting bias) |
|-------------------|---------------------------------------------|-----------------------------------------|------------------------------------------------|-------------------------------------------------|------------------------------------------|--------------------------------------|
| Jensen 1987       | ?                                           | ?                                       | ?                                              | +                                               | +                                        | +                                    |
| Hinman 2014       | +                                           | +                                       | +                                              | +                                               | +                                        | +                                    |
| Tascioglu 2004    | +                                           | ?                                       | +                                              | +                                               | +                                        | +                                    |
| Bülow 1994        | ?                                           | ?                                       | +                                              | +                                               | +                                        | +                                    |
| Gworys 2012       | ?                                           | ?                                       | ?                                              | +                                               | +                                        | +                                    |
| Gur and Oktayoglu | +                                           | ?                                       | +                                              | +                                               | +                                        | +                                    |
| Youssef 2016      | +                                           | +                                       | ?                                              | +                                               | +                                        | +                                    |
| Fukuda 2011       | +                                           | +                                       | +                                              | +                                               | +                                        | +                                    |
| Rayegani 2012     | +                                           | ?                                       | +                                              | +                                               | ?                                        | +                                    |
| Kheshie 2014      | +                                           | +                                       | +                                              | +                                               | +                                        | +                                    |
| Bagheri 2011      | ?                                           | ?                                       | +                                              | +                                               | +                                        | +                                    |
| Alfredo 2011      | +                                           | +                                       | +                                              | +                                               | +                                        | +                                    |
| Alghadir 2014     | +                                           | +                                       | +                                              | +                                               | +                                        | +                                    |
| Al Rashoud 2014   | +                                           | +                                       | +                                              | +                                               | +                                        | +                                    |
| Gur 2003          | +                                           | ?                                       | +                                              | +                                               | +                                        | +                                    |
| Delkhosh 2018     | +                                           | ?                                       | +                                              | +                                               | ?                                        | +                                    |
| Nivbrant 1992     | +                                           | ?                                       | +                                              | +                                               | +                                        | +                                    |
| Koutenaei 2017    | +                                           | +                                       | +                                              | +                                               | ?                                        | +                                    |
| Hegedus 2009      | +                                           | ?                                       | +                                              | +                                               | +                                        | +                                    |
| Mohammed 2018     | ?                                           | ?                                       | +                                              | +                                               | ?                                        | +                                    |
| Helianthi 2016    | +                                           | +                                       | ?                                              | +                                               | +                                        | +                                    |
| Nambi 2016        | +                                           | +                                       | +                                              | +                                               | +                                        | +                                    |



1  
2  
3  
4  
5  
6  
7  
8  
9  
10  
11  
12  
13  
14  
15  
16  
17  
18  
19  
20  
21  
22  
23  
24  
25  
26  
27  
28  
29  
30  
31  
32  
33  
34  
35  
36  
37  
38  
39  
40  
41  
42  
43  
44  
45  
46  
47  
48  
49  
50  
51  
52  
53  
54  
55  
56  
57  
58  
59  
60



Or peer review only

**Supplementary material for the article by Stausholm et al. entitled  
*Efficacy of low-level laser therapy on pain and disability in knee osteoarthritis:  
 A systematic review and meta-analysis of randomized placebo-controlled trials***

**Table of content**

PubMed database search string ..... 1  
 Excluded articles ..... 1  
 Pain time-effect profile of Low-Level Laser Therapy ..... 2  
 Publication and small study bias assessment ..... 3  
 Risk of bias impact analysis ..... 5  
 Support for risk of bias judgments and funding of the included trials ..... 9  
 Low-Level Laser Therapy with and without exercise therapy ..... 16  
 Mean Difference vs Standardized Mean Difference ..... 17  
 References ..... 19

**PubMed database search string**

The PubMed database search string was: ("Osteoarthritis, Knee"[Mesh] OR "Knee Joint"[Mesh] OR "Knee"[Mesh] OR "Osteoarthritis"[Mesh] OR Knee[Title/Abstract] OR Knees[Title/Abstract] OR Osteoarthr\*[Title/Abstract]) AND ("Low-Level Light Therapy"[Mesh] OR LLLT[Title/Abstract] OR "low level"[Title/Abstract] OR "low power"[Title/Abstract] OR laser therap\*[Title/Abstract] OR "laser acupuncture"[Title/Abstract] OR "narrow band"[Title/Abstract] OR "HeNe"[Title/Abstract] OR "632 nm"[Title/Abstract] OR "Ga-Al-As"[Title/Abstract] OR "820 nm"[Title/Abstract] OR "830 nm"[Title/Abstract] OR "850 nm"[Title/Abstract] OR "GaAs"[Title/Abstract] OR "904 nm"[Title/Abstract])

**Excluded articles**

**Table 1 | Excluded articles initially judged potentially eligible**

| First author                     | Reason for exclusion                             |
|----------------------------------|--------------------------------------------------|
| Alayat 2017 <sup>1</sup>         | HILT, not LLLT                                   |
| Ciechanowska 2008 <sup>2</sup>   | No placebo-control                               |
| Coelho <sup>3</sup>              | Only study protocol                              |
| de Matos 2018 <sup>4</sup>       | No placebo-control                               |
| de Meneses <sup>5</sup>          | Full-text not available (emailed)                |
| de Paula 2018 <sup>6</sup>       | NBLT + LLLT vs sham LLLT alone                   |
| Giavelli 1998 <sup>7</sup>       | No placebo-control                               |
| Götte 1995 <sup>8</sup>          | No outcome data reported                         |
| Kujawa 2004 <sup>9</sup>         | No placebo-control                               |
| Leal-Junior 2014 <sup>10</sup>   | Non-specific knee pain                           |
| Lepilina 1990 <sup>11</sup>      | No placebo-control                               |
| Marquina 2012 <sup>12</sup>      | Non-specific knee pain                           |
| Montes-Molina 2009 <sup>13</sup> | No placebo-control                               |
| Nakamura 2014 <sup>14</sup>      | No placebo-control                               |
| Paolillo 2018 <sup>15</sup>      | No placebo-control                               |
| Pinfildi <sup>16</sup>           | Full-text not available (emailed)                |
| Ren 2010 <sup>17</sup>           | No placebo-control                               |
| Shen 2009 <sup>18</sup>          | LLLT + moxibustion vs sham LLLT alone            |
| Soleimanpour 2014 <sup>19</sup>  | No placebo-control                               |
| Stelian 1992 <sup>20</sup>       | NBLT, not laser                                  |
| Trelles 1991 <sup>21</sup>       | No placebo-control                               |
| Wang 2013 <sup>22</sup>          | No randomization                                 |
| Yavuz 2013 <sup>23</sup>         | No placebo-control                               |
| Yurtkuran 2006 <sup>24</sup>     | Irradiated acupoint spleen 9, not the knee joint |
| Yuvarani 2018 <sup>25</sup>      | No placebo-control                               |
| Zhao 2010 <sup>26</sup>          | No placebo-control                               |
| Zou 2017 <sup>27</sup>           | No placebo-control                               |

NBLT = narrow-band light therapy; LLLT = Low-Level Laser Therapy; HILT = High Intensity Laser Therapy.

## Pain time-effect profile of Low-Level Laser Therapy

Analyses were performed to estimate the pain time-effect profile of the recommended Low-Level Laser Therapy doses by imputing the results of the trials with these doses in subgroups with narrower time intervals (figure 1).

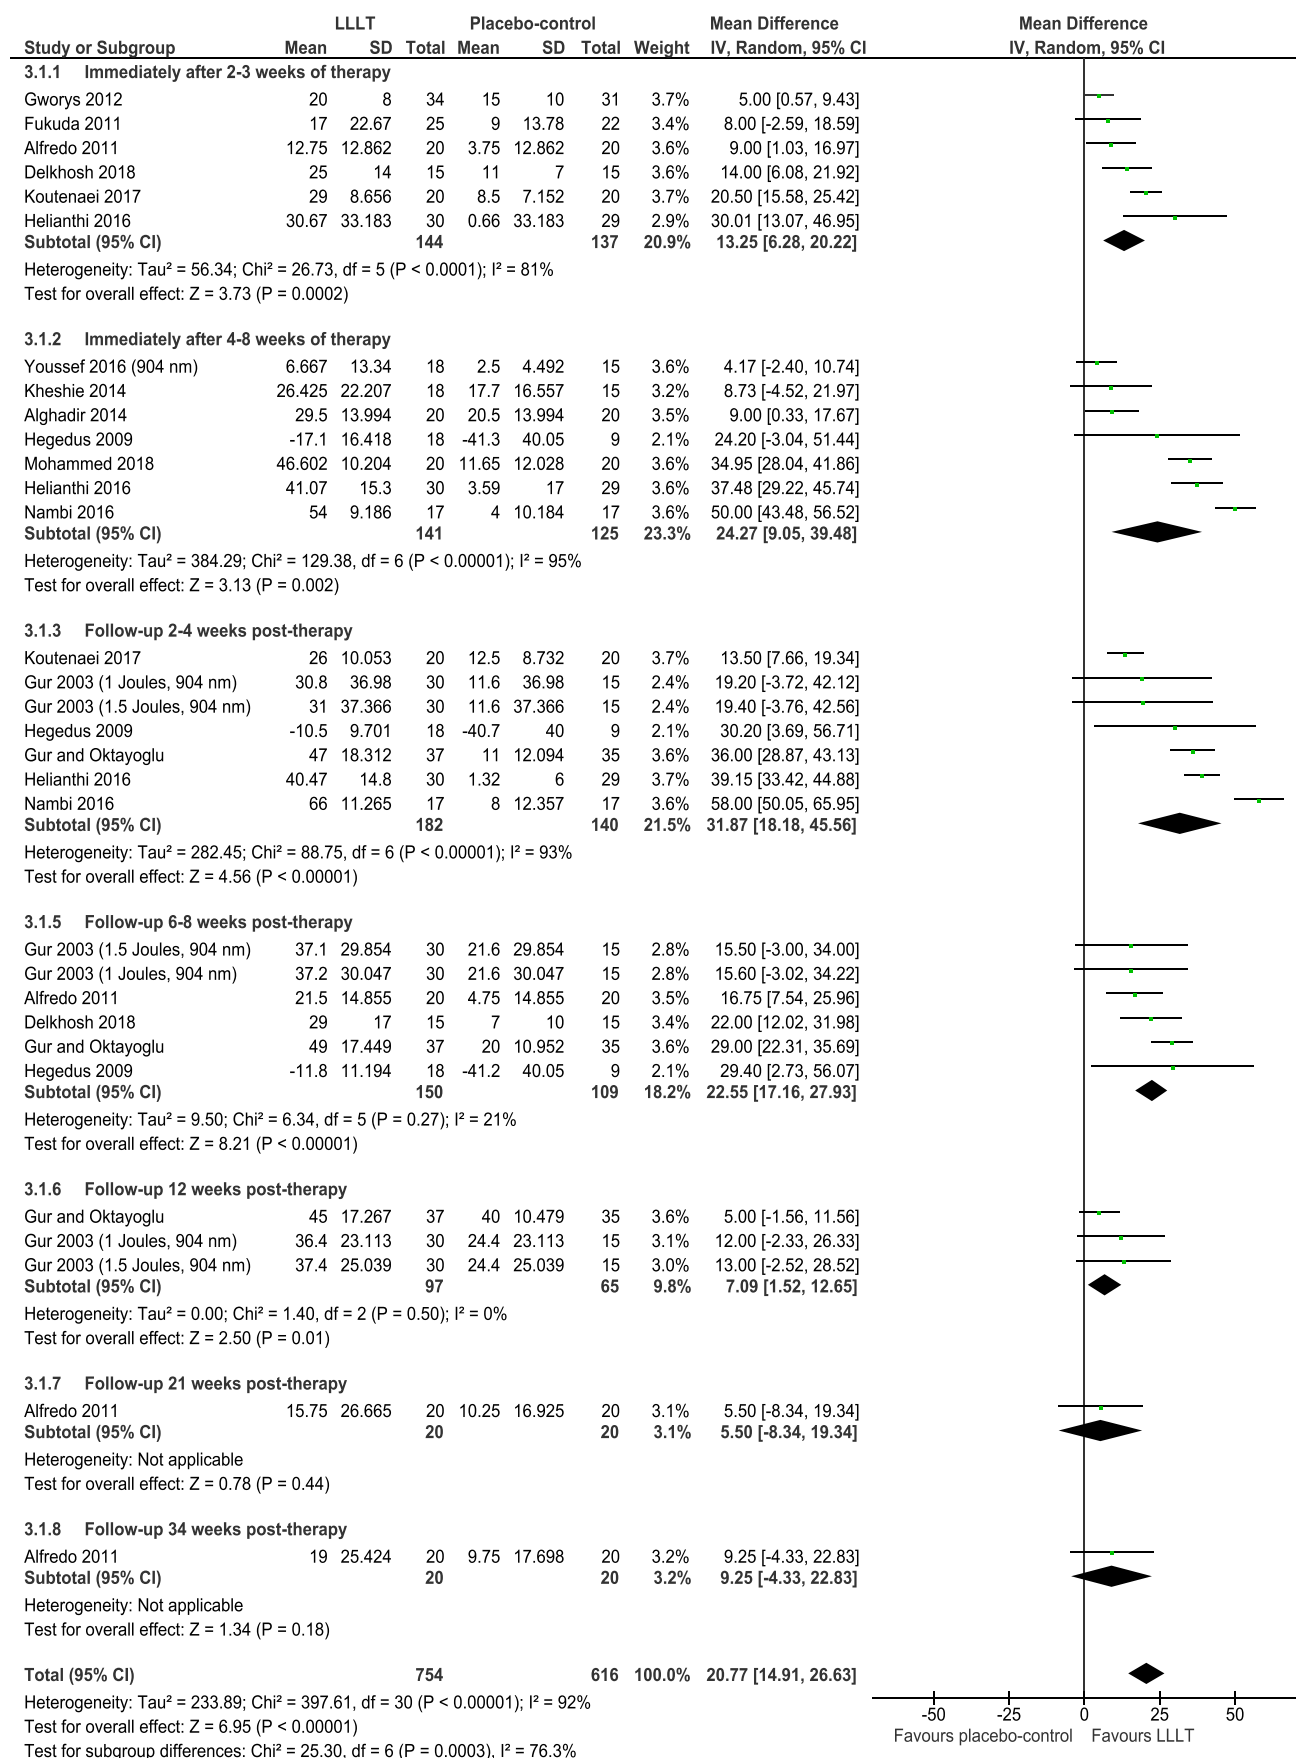

Figure 1 | Pain time-effect profile (recommended Low-Level Laser Therapy doses vs placebo-control)

**Publication and small study bias assessment**

Funnel plots were performed using the results from the main analyses (immediately after the end of therapy, primarily). There were no clear indications of publication bias (figure 2-3). Moreover, a subsequent change from random to fixed effects models only caused a slight change in point effect estimates: Pain results from 13.22 to 14.14 mm VAS (figure 4-5) and disability from 0.57 to 0.48 (SMD) (figure 6-7).

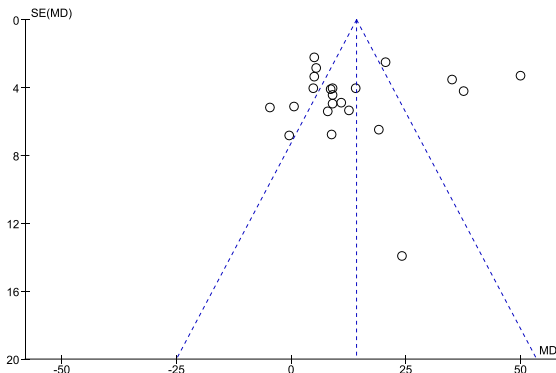

Figure 2 | Funnel plot (pain)

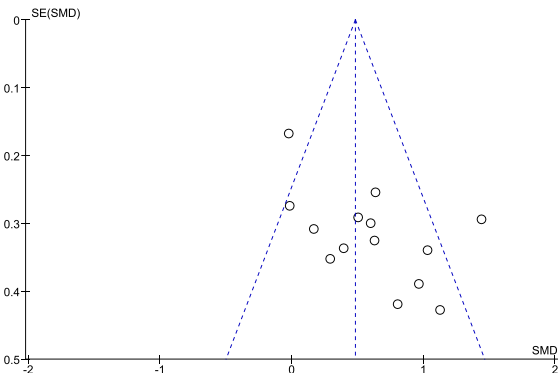

Figure 3 | Funnel plot (disability)

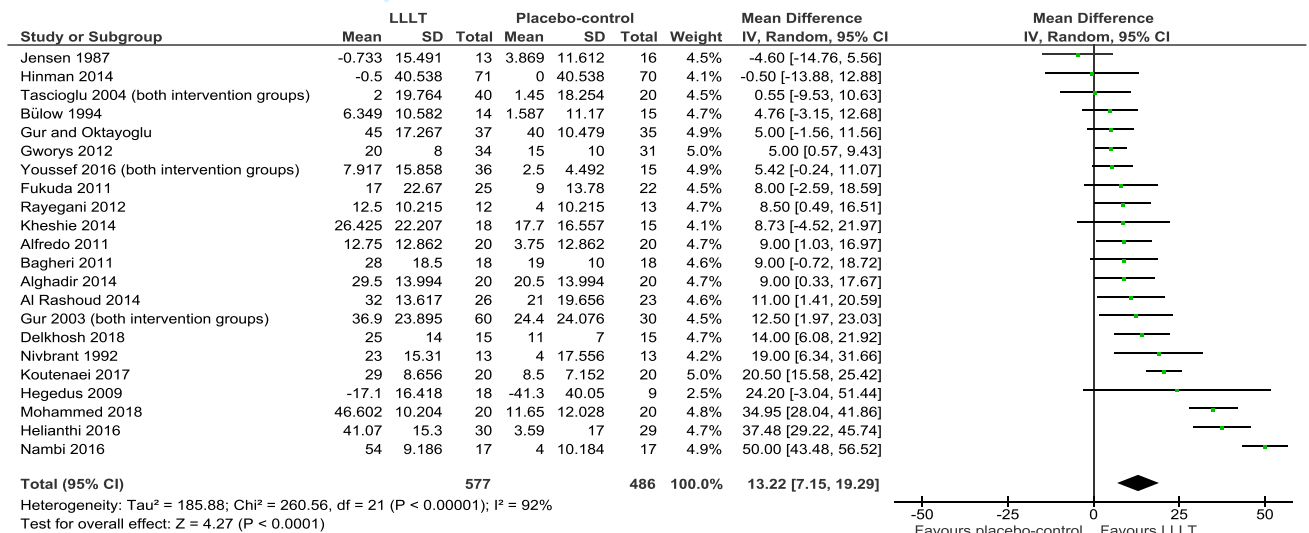

Figure 4 | Random effects model (pain)

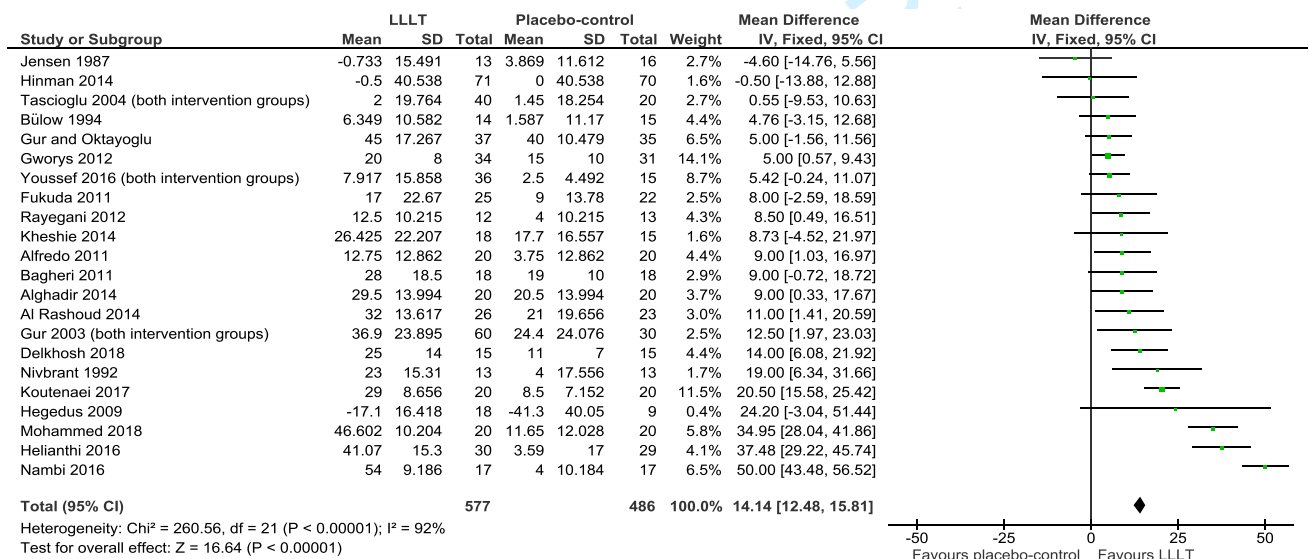

Figure 5 | Fixed effects model (pain)

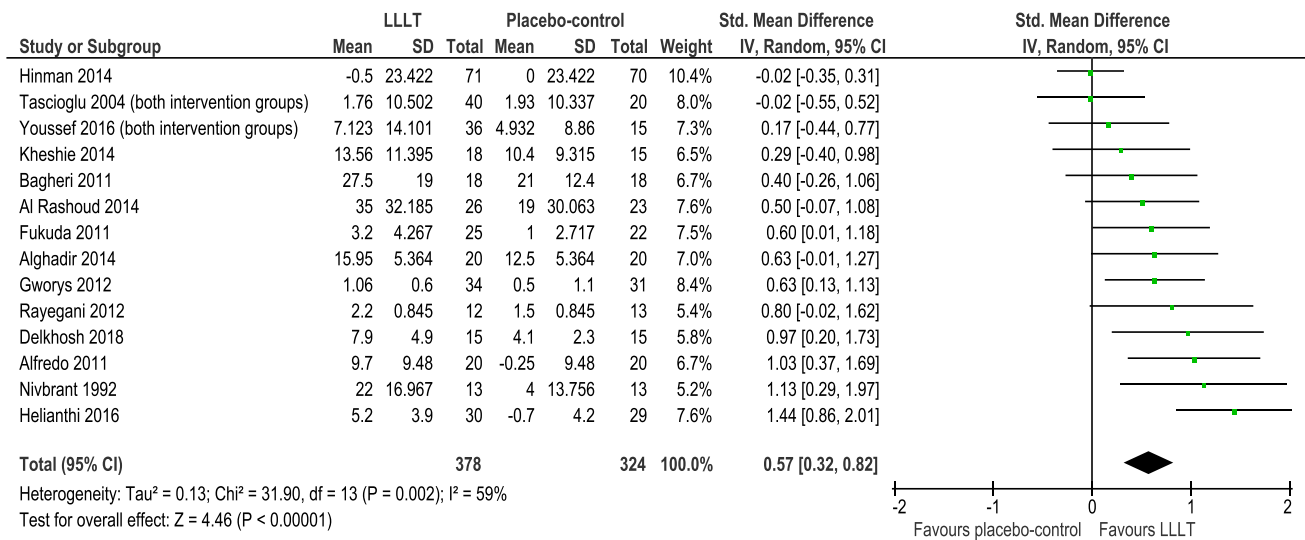

Figure 6 | Random effects model (disability)

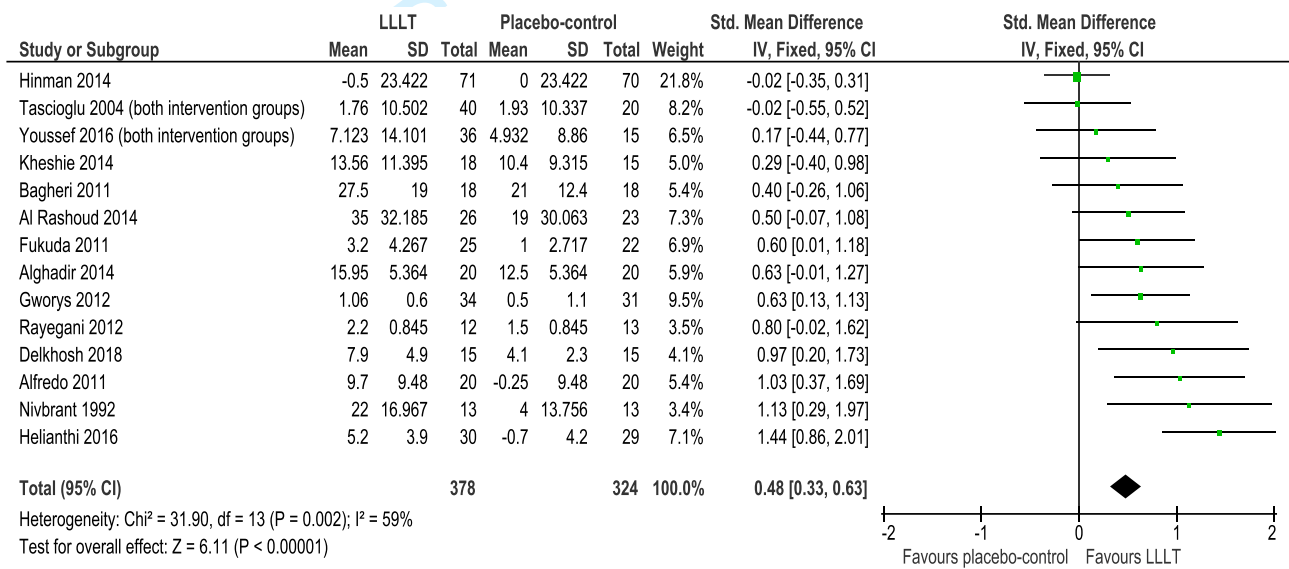

Figure 7 | Fixed effects model (disability)

**Risk of bias impact analysis**

Risk of bias impact analyses were performed using the results from the main analyses (immediately after the end of therapy, primarily). The mean statistical heterogeneity of the subgroup analyses were similar to the overall levels (figure 8-15).

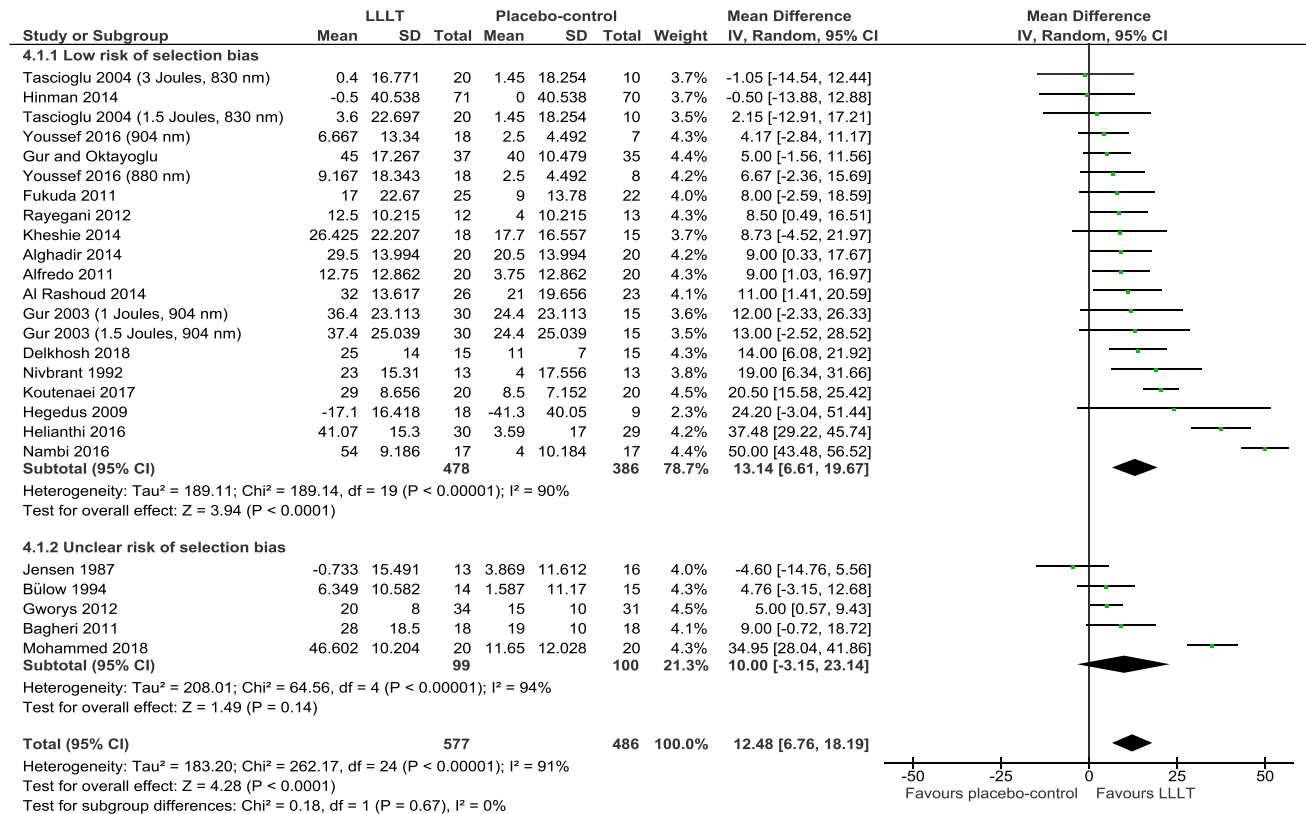

Figure 8 | Pain results - risk of selection bias (random sequence generation)

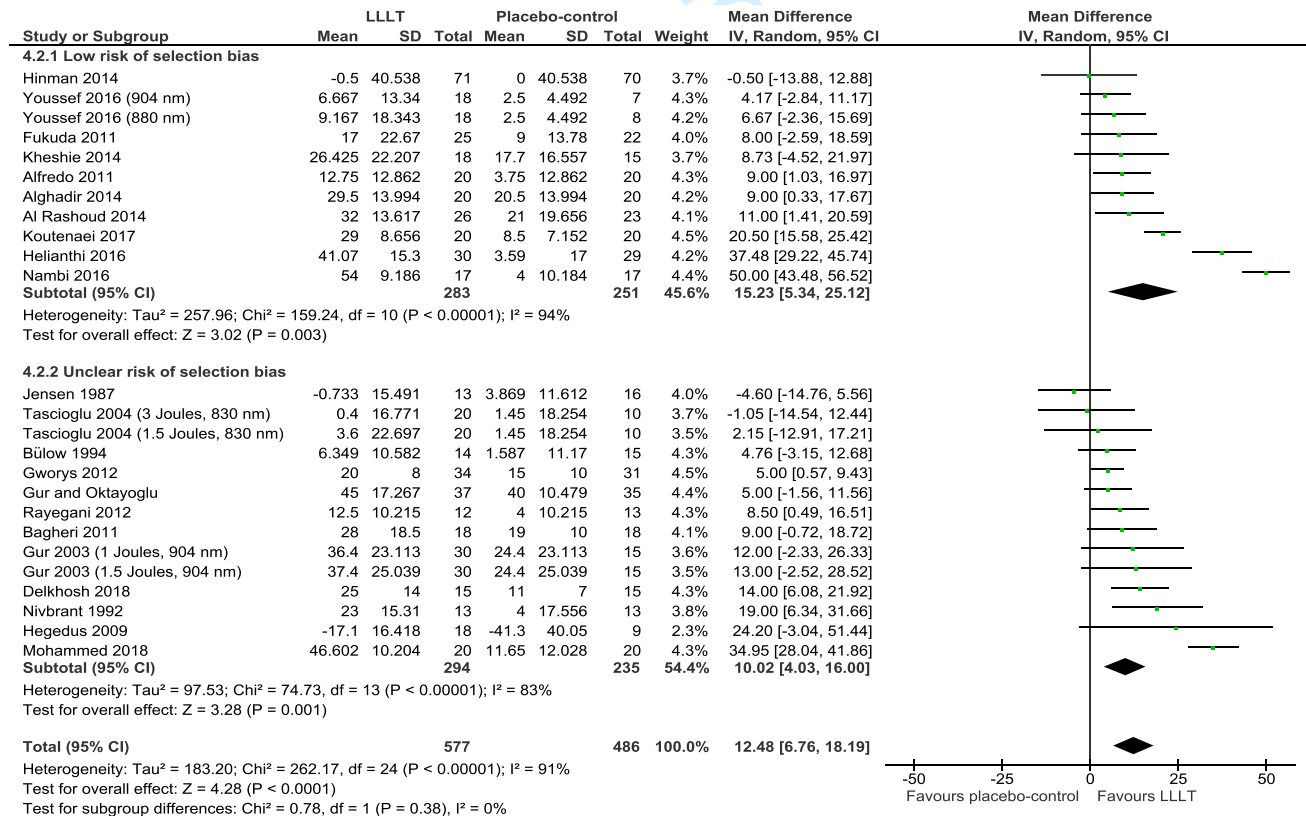

Figure 9 | Pain results - risk of selection bias (allocation concealment)



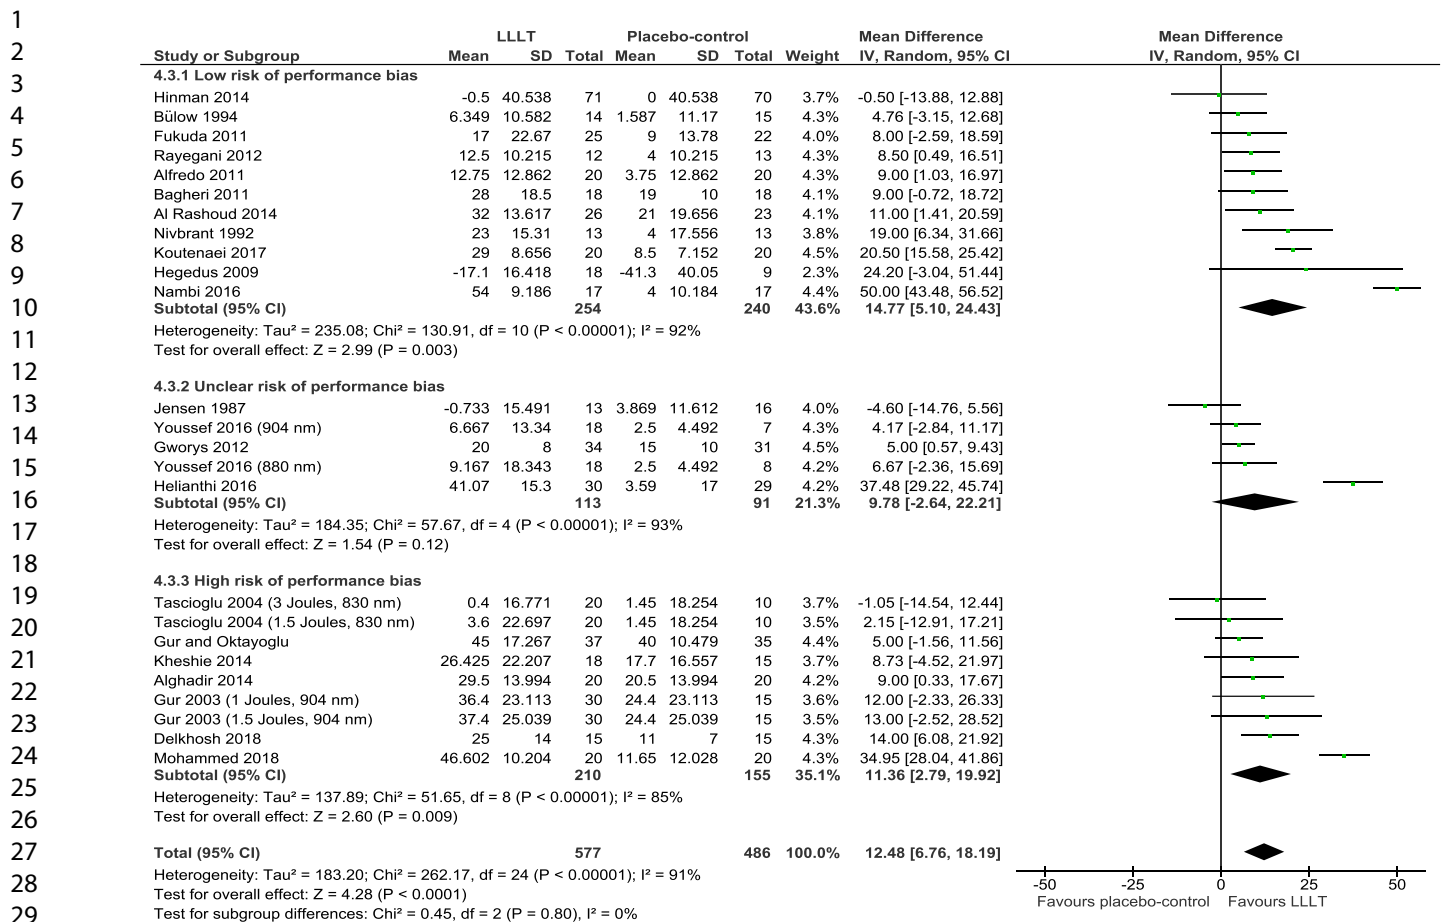

Figure 10 | Pain results - risk of performance bias (blinding of therapist)

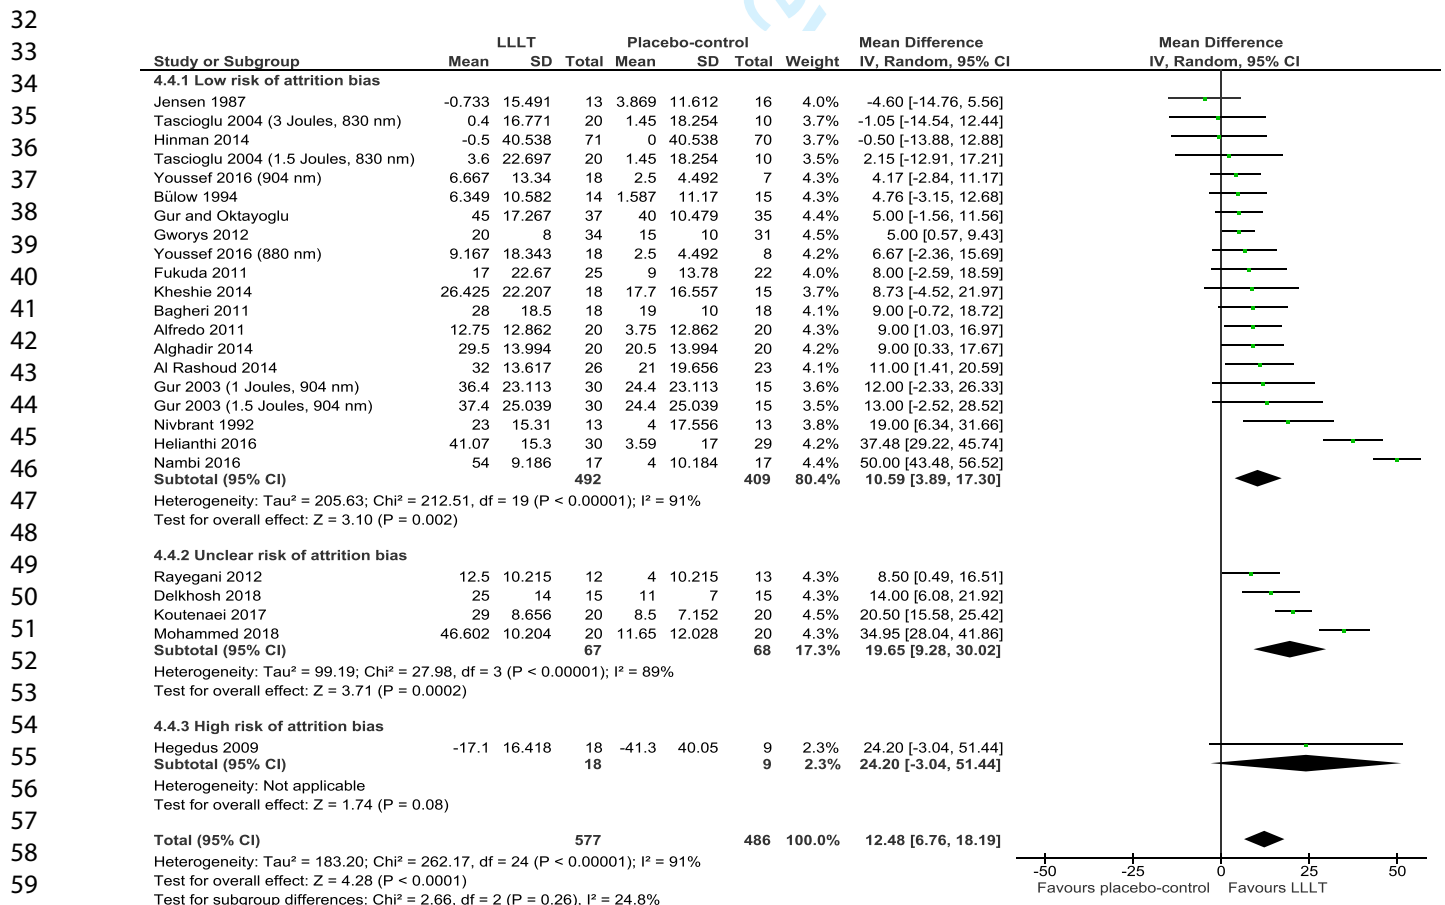

Figure 11 | Pain results - risk of attrition bias (incomplete outcome data)

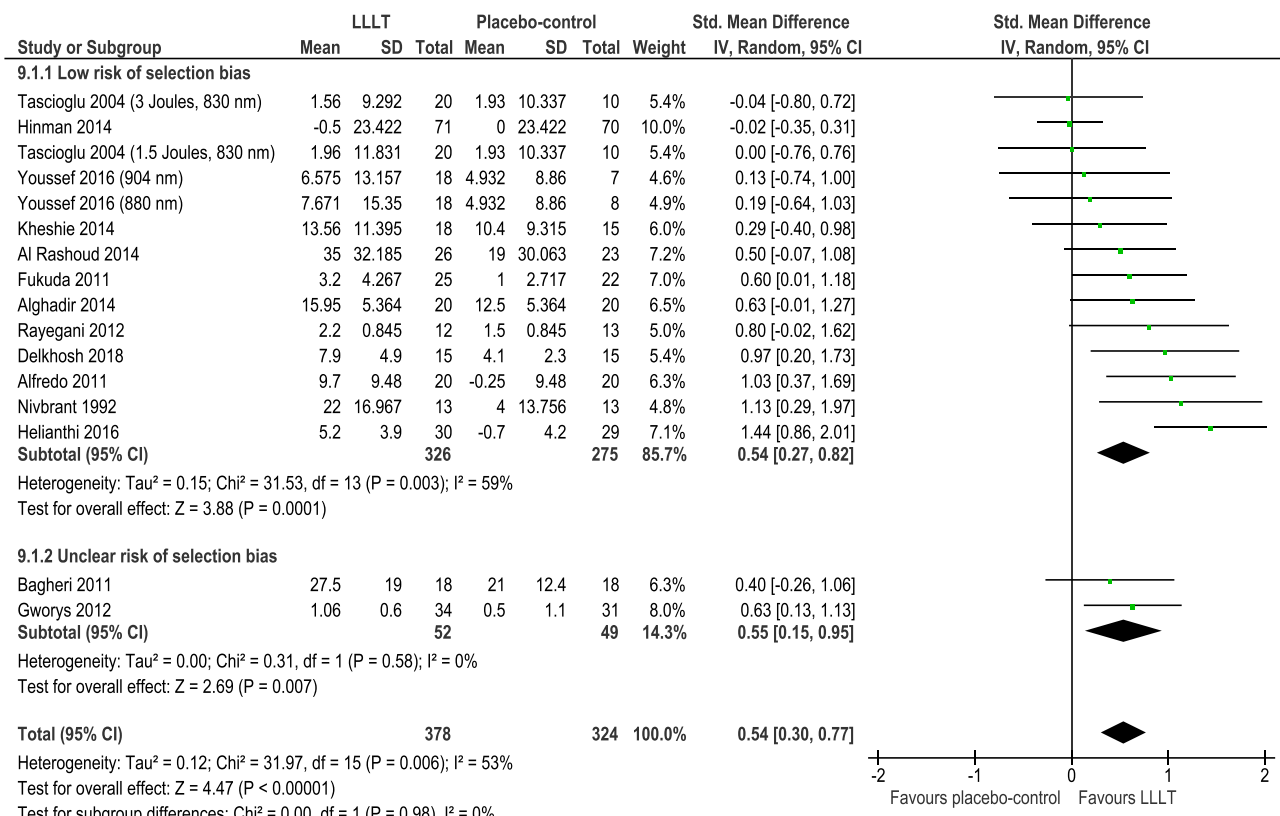

Figure 12 | Disability results - risk of selection bias (random sequence generation)

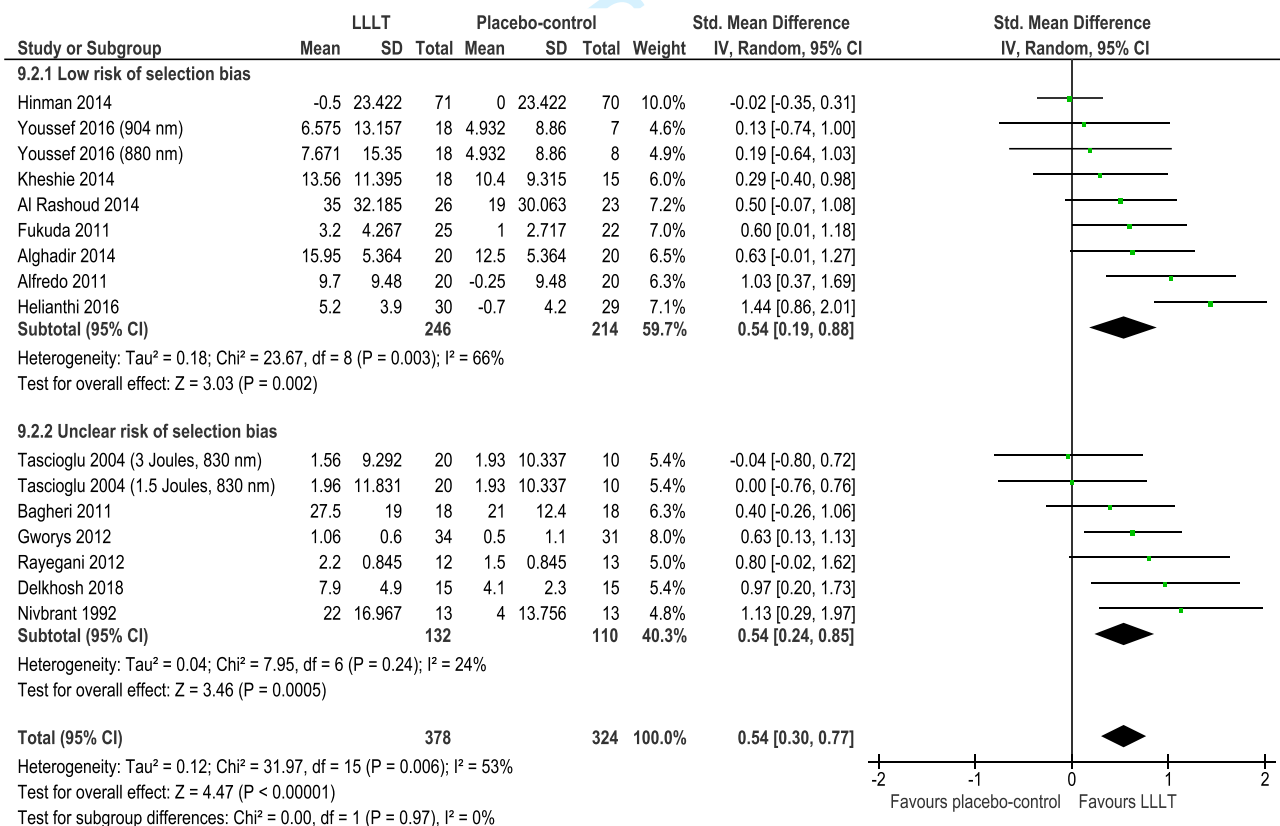

Figure 13 | Disability results - risk of selection bias (allocation concealment)

1  
2  
3  
4  
5  
6  
7  
8  
9  
10  
11  
12  
13  
14  
15  
16  
17  
18  
19  
20  
21  
22  
23  
24  
25  
26  
27  
28  
29  
30  
31  
32  
33  
34  
35  
36  
37  
38  
39  
40  
41  
42  
43  
44  
45  
46  
47  
48  
49  
50  
51  
52  
53  
54  
55  
56  
57  
58  
59  
60

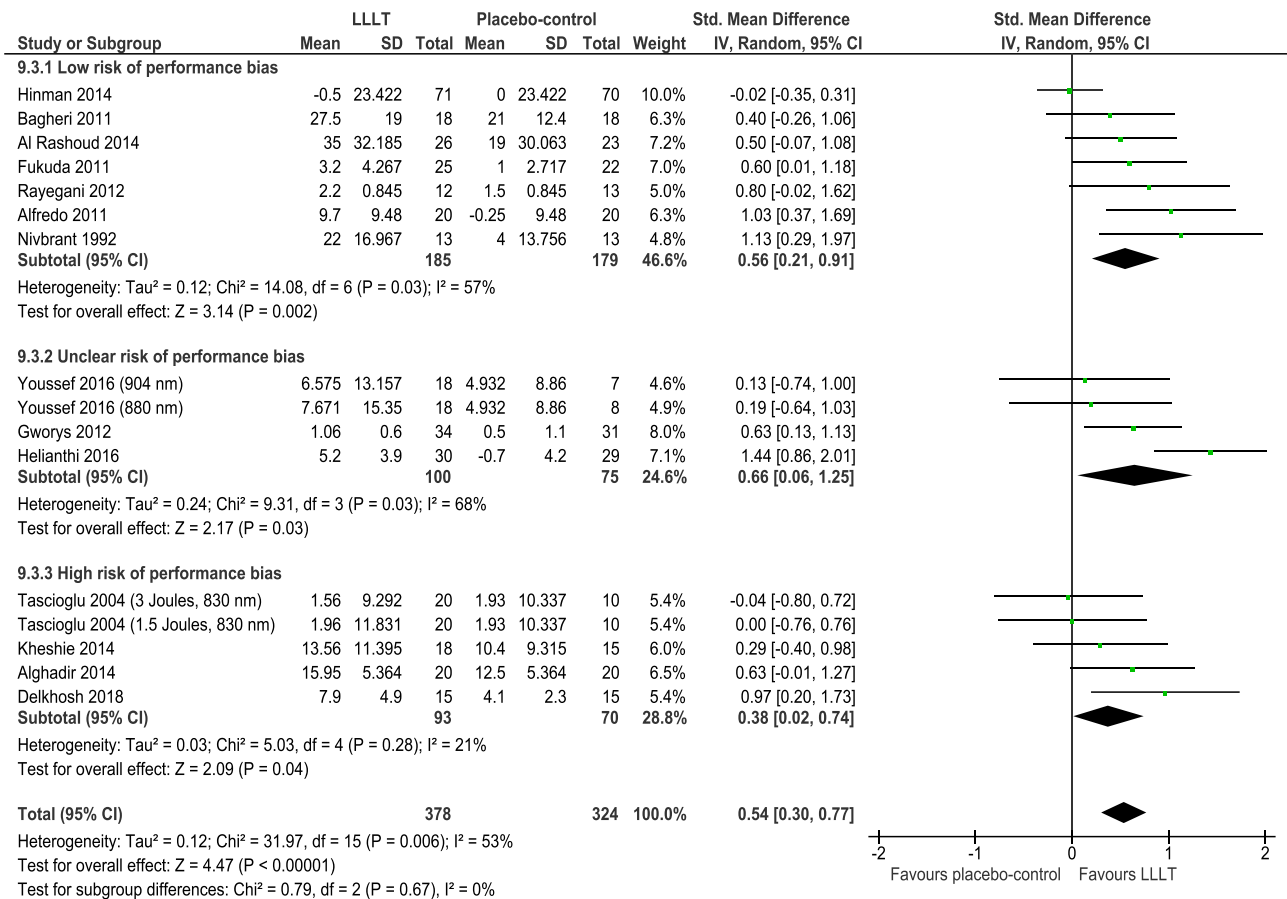

Figure 14 | Disability results - risk of performance bias (blinding of therapist)

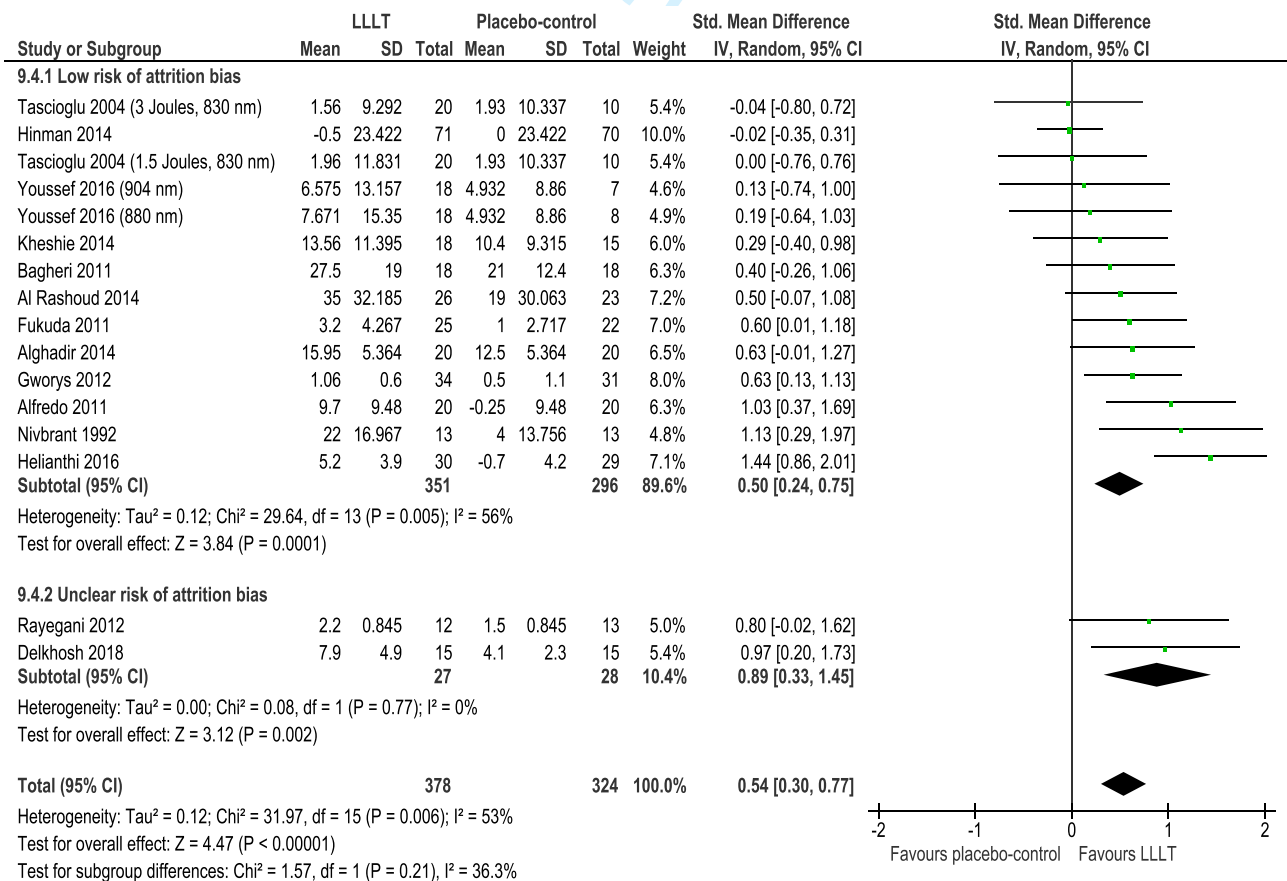

Figure 15 | Disability results - risk of attrition bias (incomplete outcome data)

## Support for risk of bias judgments and funding of the included trials

### Al Rashoud et al. 2014

| Type of bias                           | Judgment | Support for judgment                                                                                                                                                                                                                                                                                    |
|----------------------------------------|----------|---------------------------------------------------------------------------------------------------------------------------------------------------------------------------------------------------------------------------------------------------------------------------------------------------------|
| Random sequence generation             | Low risk | Quote: "... a randomization list was produced using software-generated randomised numbers to the randomisation depended on random blocks of 10."<br>Our comment: Probably done.                                                                                                                         |
| Allocation concealment                 | Low risk | Our comment: Investigators are unable to predict the allocation made by a computer-based randomization program.                                                                                                                                                                                         |
| Blinding of participants and personnel | Low risk | Quote: "Neither investigator nor the patient knew whether a placebo or active treatment was being administered to only the research assistant had the identifying code to determine which treatment was given."<br>Our comment: Probably true. The experimental group was treated with invisible laser. |
| Blinding of assessor                   | Low risk | Our comment: All outcomes of interest are self-reported (participant-assessed) and the participants were probably blinded.                                                                                                                                                                              |
| Incomplete data                        | Low risk | Quote: "Forty-nine patients with knee osteoarthritis were assigned at random into two groups: Active laser group (n = 26) and placebo laser group (n = 23)", "... 49 completed the study ...".<br>Our comment: Probably true.                                                                           |
| Selective reporting                    | Low risk | Our comment: Reported in adherence to a protocol (International Standard Randomised Controlled Trials Number: ISRCTN24010862).                                                                                                                                                                          |

**Funding – quote:** "The project was funded by general administration for medical services of Ministry of Interior, Security Forces Hospital; Riyadh, Saudi Arabia."

### Alfredo et al. 2011

| Type of bias                           | Judgment | Support for judgment                                                                                                                                                                                                                                                                                                                                                     |
|----------------------------------------|----------|--------------------------------------------------------------------------------------------------------------------------------------------------------------------------------------------------------------------------------------------------------------------------------------------------------------------------------------------------------------------------|
| Random sequence generation             | Low risk | Quote: "Randomization was performed by using sealed, randomly filled envelopes describing the treatment group. Patients and the physiotherapist responsible for the evaluation were unaware of randomization results".<br>Our comment: Probably done. It seems unlikely that the investigators could easily predict the group allocation due to the sequence generation. |
| Allocation concealment                 | Low risk | Quote: "Patients and the physiotherapist responsible for the randomization were unaware of the randomization results".<br>Our comment: Probably true.                                                                                                                                                                                                                    |
| Blinding of participants and personnel | Low risk | Quote: "All patients were treated by the same physiotherapist who had not taken part in the evaluations".<br>"The laser equipment had two identical pens, one for the active treatment and one for the placebo treatment (sealed)".<br>Our comment: Probably done. The experimental group was treated with invisible laser.                                              |
| Blinding of assessor                   | Low risk | Quote: "All participants were evaluated by the same blinded physiotherapist"<br>Our comment: All outcomes of interest are self-reported (participant-assessed) and the participants were probably blinded.                                                                                                                                                               |
| Incomplete data                        | Low risk | Our comment: 13% of the included participants were not evaluated. This number is unlikely to introduce a relevant bias.                                                                                                                                                                                                                                                  |
| Selective reporting                    | Low risk | Reported in adherence to a protocol (Clinical Trials number: CT01306435).                                                                                                                                                                                                                                                                                                |

**Funding – quote:** "This study was supported financially by: Fundação de Amparo à Pesquisa do Estado de São Paulo (FAPESP) – Foundation of Research Support of São Paulo State and Coordenação de Aperfeiçoamento de Pessoal de Nível Superior (CAPES) – Coordination for the Improvement of Higher Level – or Education – Personnel. Biostatistics Support Group, Department of Dentistic, School of Odontology, University of São Paulo, São Paulo, Brazil."

### Alghadir et al. 2013

| Type of bias                           | Judgment  | Support for judgment                                                                                                                                                                                                                                                                       |
|----------------------------------------|-----------|--------------------------------------------------------------------------------------------------------------------------------------------------------------------------------------------------------------------------------------------------------------------------------------------|
| Random sequence generation             | Low risk  | Quote: "Randomization was performed using sealed, randomly filled envelopes".<br>Our comment: Probably done.                                                                                                                                                                               |
| Allocation concealment                 | Low risk  | Our comment: It seems unlikely that the investigators could easily predict the group allocation due to the sequence generation.                                                                                                                                                            |
| Blinding of participants and personnel | High risk | Quote: "The treatment parameters were identical, but without switching on the machine".<br>Our comment: Probably done. The study is described as single-blinded. The experimental group was treated with invisible laser. The physiotherapists treating the participants were not blinded. |
| Blinding of assessor                   | Low risk  | Our comment: All outcomes of interest are self-reported (participant-assessed) and the participants were probably blinded.                                                                                                                                                                 |
| Incomplete data                        | Low risk  | Quote: "(...) all of them completed the study period."<br>Our comment: Probably true.                                                                                                                                                                                                      |
| Selective reporting                    | Low risk  | Our comment: Reported as stated in the protocol.                                                                                                                                                                                                                                           |

**Funding – quote:** "The authors extend their appreciation to the Deanship of Scientific Research at King Saud University for funding the work through the research group project NO RGP-VPP-209."

**Bagheri et al. 2010**

| Type of bias                           | Judgment     | Support for judgment                                                                                                                                                                                                                           |
|----------------------------------------|--------------|------------------------------------------------------------------------------------------------------------------------------------------------------------------------------------------------------------------------------------------------|
| Random sequence generation             | Unclear risk | Quote (translated from Farsi): <i>"The random distribution of people was done in such a way that the number of male and female patients is the same in both groups"</i> .<br>Our comment: Not enough information to make a qualified judgment. |
| Allocation concealment                 | Unclear risk | Our comment: Not enough information to make a qualified judgment.                                                                                                                                                                              |
| Blinding of participants and personnel | Low risk     | Quote (translated from Farsi): <i>"The presence of active or inactive lasers was not known"</i> .<br>Our comment: Probably true. The experimental group was treated with invisible laser.                                                      |
| Blinding of assessor                   | Low risk     | Our comment: All outcomes of interest are self-reported (participant-assessed) and the participants were probably blinded. The experimental group was treated with invisible laser.                                                            |
| Incomplete data                        | Low risk     | Our comment: 10% of the participants were not evaluated. This number is unlikely to introduce a relevant bias.                                                                                                                                 |
| Selective reporting                    | Low risk     | Our comment: No outcome of interest described in the method section is missing from the result section.                                                                                                                                        |

**Funding:** Sponsored by the Semnan University of Science.

**Bülow et al. 1994**

| Type of bias                           | Judgment     | Support for judgment                                                                                                                                                                                                                                                                         |
|----------------------------------------|--------------|----------------------------------------------------------------------------------------------------------------------------------------------------------------------------------------------------------------------------------------------------------------------------------------------|
| Random sequence generation             | Unclear risk | Our comment: The authors state that the study is randomized, but there is no description of the randomization method.                                                                                                                                                                        |
| Allocation concealment                 | Unclear risk | Our comment: Not enough information to make a qualified judgment.                                                                                                                                                                                                                            |
| Blinding of participants and personnel | Low risk     | Quote: <i>"The nurse in charge of the randomization key selected the laser or placebo-laser before each treatment"</i> and <i>"The blinded settings for patient and physician were maintained"</i> .<br>Our comment: Probably done. The experimental group was treated with invisible laser. |
| Blinding of assessor                   | Low risk     | Our comment: All outcomes of interest are self-reported (participant-assessed) and the participants were probably blinded.                                                                                                                                                                   |
| Incomplete data                        | Low risk     | Our comment: No dropouts.                                                                                                                                                                                                                                                                    |
| Selective reporting                    | Low risk     | Our comment: No outcomes of interest described in the method section is missing in the result section.                                                                                                                                                                                       |

**Funding – quote:** *"The study was sponsored by Henny and Helge Holgersen's Foundation and the Bodil Petersen Foundation."*

**Delkhosh et al. 2018**

| Type of bias                           | Judgment     | Support for judgment                                                                                                                                                                                                                                                                                                                                                                                                 |
|----------------------------------------|--------------|----------------------------------------------------------------------------------------------------------------------------------------------------------------------------------------------------------------------------------------------------------------------------------------------------------------------------------------------------------------------------------------------------------------------|
| Random sequence generation             | Low risk     | Quote: <i>"... volunteers are randomly allocated to three groups by lottery."</i><br>Our comment: Probably done.                                                                                                                                                                                                                                                                                                     |
| Allocation concealment                 | Unclear risk | Our comment: Not enough information to make a qualified judgment.                                                                                                                                                                                                                                                                                                                                                    |
| Blinding of participants and personnel | High risk    | Quotes: <i>"The patients were randomly assigned to three groups: 1-standard treatment with placebo laser..."</i> and <i>"Not blinded"</i> .<br>Our comment: The investigators claimed the trial was placebo-controlled which is probably true as the participants were treated with invisible laser. Therefore, it seems likely that the investigators statement regarding lack of blinding refers to the therapist. |
| Blinding of assessor                   | Low risk     | Our comment: All outcomes of interest are self-reported (participant-assessed) and the participants were probably blinded.                                                                                                                                                                                                                                                                                           |
| Incomplete data                        | Unclear risk | Our comment: Not enough information to make a qualified judgment.                                                                                                                                                                                                                                                                                                                                                    |
| Selective reporting                    | Low risk     | Our comment: Reported in adherence to a protocol (Iranian Registry of Clinical Trials number: IRCT201502224549N8).                                                                                                                                                                                                                                                                                                   |

**Funding – quote:** *"Vice chancellor for research, Semnan University of Medical Sciences."*



## Fukuda et al. 2011

| Type of bias                           | Judgment | Support for judgment                                                                                                                                                                                                                                                                                                             |
|----------------------------------------|----------|----------------------------------------------------------------------------------------------------------------------------------------------------------------------------------------------------------------------------------------------------------------------------------------------------------------------------------|
| Random sequence generation             | Low risk | Quote: "This distribution was made by a secretary who was not involved in the treatment or evaluation, through a draw of sealed opaque envelopes. The envelopes were taken directly to the therapist without the patient having access to the result."<br>Our comment: Probably done.                                            |
| Allocation concealment                 | Low risk | Our comment: It seems unlikely that the investigators could easily predict the group allocation due to the sequence generation.                                                                                                                                                                                                  |
| Blinding of participants and personnel | Low risk | Quote: "(...) two identical pens, of which one was active (laser) and the other was sealed (placebo). These were labelled A and B by the project secretary, and only this person knew the true identification of the pens."<br>Our comment to the quote: Probably done. The experimental group was treated with invisible laser. |
| Blinding of assessor                   | Low risk | Our comment: All outcomes of interest are self-reported (participant-assessed) and the participants were probably blinded.                                                                                                                                                                                                       |
| Incomplete data                        | Low risk | Our comment: No dropouts.                                                                                                                                                                                                                                                                                                        |
| Selective reporting                    | Low risk | Our comment: No outcome of interest described in the method section is missing from the result section.                                                                                                                                                                                                                          |

**Funding:** Physical Therapy Sector, Irmandade da Santa Casa de Misericórdia de São Paulo (ISCMSP), São Paulo, São Paulo, Brazil.

## Gur &amp; Oktayoglu

| Type of bias                           | Judgment     | Support for judgment                                                                                                                                                                                                                                                                                                                                                                                      |
|----------------------------------------|--------------|-----------------------------------------------------------------------------------------------------------------------------------------------------------------------------------------------------------------------------------------------------------------------------------------------------------------------------------------------------------------------------------------------------------|
| Random sequence generation             | Low risk     | Quote: "Patients were randomly assigned to three treatment groups by one of the non-treating authors by drawing 1 of 120 envelopes."<br>Our comment: Probably done.                                                                                                                                                                                                                                       |
| Allocation concealment                 | Unclear risk | Our comment: It is unclear whether envelopes were opaque and sealed.                                                                                                                                                                                                                                                                                                                                      |
| Blinding of participants and personnel | High risk    | Quote: "The study was conducted in a double-blind fashion. Subjects and physician were unaware of the code for active or placebo laser until the data analysis was completed but therapist was aware of the code for active or placebo laser."<br>Our comment: Probably true. The experimental group was treated with invisible laser. The participants were probably blinded, but the therapist was not. |
| Blinding of assessor                   | Low risk     | Our comment: All outcomes of interest are self-reported (participant-assessed) and the participants were probably blinded.                                                                                                                                                                                                                                                                                |
| Incomplete data                        | Low risk     | Our comment: 7.5% of the participants allocated to the laser group were not evaluated. 12.5% of the participants allocated to the control group were not evaluated. These numbers are unlikely to introduce a relevant bias. Reasons for dropout across groups are similar.                                                                                                                               |
| Selective reporting                    | Low risk     | Our comment: No outcome of interest described in the method section is missing from the result section.                                                                                                                                                                                                                                                                                                   |

**Funding:** Not stated.

## Gur et al. 2003

| Type of bias                           | Judgment     | Support for judgment                                                                                                                                                                                                                                                                                                                                                                                      |
|----------------------------------------|--------------|-----------------------------------------------------------------------------------------------------------------------------------------------------------------------------------------------------------------------------------------------------------------------------------------------------------------------------------------------------------------------------------------------------------|
| Random sequence generation             | Low risk     | Quote: "Patients were randomly assigned to three treatment groups by one of the non-treating authors by drawing of 1 of 90 envelopes."<br>Our comment: Probably done.                                                                                                                                                                                                                                     |
| Allocation concealment                 | Unclear risk | Our comment: It is unclear whether envelopes were opaque and sealed.                                                                                                                                                                                                                                                                                                                                      |
| Blinding of participants and personnel | High risk    | Quote: "The study was conducted in a double-blind fashion. Subjects and physician were unaware of the code for active or placebo laser until the data analysis was completed but therapist was aware of the code for active or placebo laser."<br>Our comment: Probably true. The experimental group was treated with invisible laser. The participants were probably blinded, but the therapist was not. |
| Blinding of assessor                   | Low risk     | Our comment: All outcomes of interest are self-reported (participant-assessed) and the participants were probably blinded.                                                                                                                                                                                                                                                                                |
| Incomplete data                        | Low risk     | Our comment: No dropouts.                                                                                                                                                                                                                                                                                                                                                                                 |
| Selective reporting                    | Low risk     | Our comment: No outcome of interest described in the method section is missing from the result section.                                                                                                                                                                                                                                                                                                   |

**Funding:** Not stated.



**Gworys et al. 2012**

| Type of bias                           | Judgment     | Support for judgment                                                                                                                                                                                                                                                                                                       |
|----------------------------------------|--------------|----------------------------------------------------------------------------------------------------------------------------------------------------------------------------------------------------------------------------------------------------------------------------------------------------------------------------|
| Random sequence generation             | Unclear risk | Our comment: The authors state that the study is randomized, but there is no description of the randomization method.                                                                                                                                                                                                      |
| Allocation concealment                 | Unclear risk | Our comment: Not enough information to make a qualified judgment.                                                                                                                                                                                                                                                          |
| Blinding of participants and personnel | Unclear risk | Quote: "(...) a placebo group where laser therapy procedures were simulated without actual irradiation."<br>Our comment: Probably done. The experimental group was treated with invisible laser. The participants were probably blinded, but there is too little information to judge whether the therapists were blinded. |
| Blinding of assessor                   | Low risk     | Our comment: All outcomes of interest are self-reported (participant-assessed) and the participants were probably blinded.                                                                                                                                                                                                 |
| Incomplete data                        | Low risk     | Quote: "laser the therapy sessions were performed once a day, 5 days a week over 2 weeks. Each patient attended 10 sessions."<br>Our comment: All participants probably attended to all 10 sessions. The outcomes were assessed immediately after the 10 sessions. Thus, there were probably no dropouts.                  |
| Selective reporting                    | Low risk     | Our comment: No outcome of interest described in the method section is missing from the result section.                                                                                                                                                                                                                    |

**Funding:** Not stated.

**Hegedus et al. 2009**

| Type of bias                           | Judgment     | Support for judgment                                                                                                                                                                                                                         |
|----------------------------------------|--------------|----------------------------------------------------------------------------------------------------------------------------------------------------------------------------------------------------------------------------------------------|
| Random sequence generation             | Low risk     | Quote: "Randomization was ensured by having patients randomly choose sealed envelopes from a bowl".<br>Our comment: Probably done.                                                                                                           |
| Allocation concealment                 | Unclear risk | Our comment: It is unclear whether envelopes were opaque.                                                                                                                                                                                    |
| Blinding of participants and personnel | Low risk     | Quote: "Neither the patients nor the operator knew which was the active or placebo LLLT probe."<br>Our comment: Probably true. The experimental group was treated with invisible laser.                                                      |
| Blinding of assessor                   | Low risk     | Quote: "Neither the patients nor the operator knew which was the active or placebo LLLT probe."<br>Our comment: Probably true. All outcomes of interest are self-reported (participant-assessed) and the participants were probably blinded. |
| Incomplete data                        | High risk    | Our comment: 50% of the participants in the control group were not evaluated while 100% of the participants in the laser group were evaluated. These numbers are likely to introduce a relevant bias.                                        |
| Selective reporting                    | Low risk     | Our comment: No outcome of interest described in the method section is missing from the result section.                                                                                                                                      |

**Funding - quote:** "The authors wish to thank Dr. Gábor Deák for the Doppler examinations and András Tóth for taking the numerous thermographic images."

**Helianti et al. 2016**

| Type of bias                           | Judgment     | Support for judgment                                                                                                                                                                                                                                                                                                                                                                                                                                                                                                                                                                                 |
|----------------------------------------|--------------|------------------------------------------------------------------------------------------------------------------------------------------------------------------------------------------------------------------------------------------------------------------------------------------------------------------------------------------------------------------------------------------------------------------------------------------------------------------------------------------------------------------------------------------------------------------------------------------------------|
| Random sequence generation             | Low risk     | Quote: "a randomization list was created using a computer-generated table containing random numbers."<br>Our comment: Probably done.                                                                                                                                                                                                                                                                                                                                                                                                                                                                 |
| Allocation concealment                 | Low risk     | Our comment: Investigators are unable to predict the allocation made by a computer-based randomization program.                                                                                                                                                                                                                                                                                                                                                                                                                                                                                      |
| Blinding of participants and personnel | Unclear risk | Quote: "Both investigator and participants did not know whether laser acupuncture active treatment or placebo treatment was being administered. Only the researcher and her assistant had the code to determine which treatment was given. Both groups used the same laser device and the same study site. Participant blinding was optimized by using eye mask and headset (...)".<br>Our comment: The experimental group was treated with invisible laser. The investigator and participants were probably blinded, but it is unclear who administered the therapy and if this person was blinded. |
| Blinding of assessor                   | Low risk     | Our comment: All outcomes of interest are self-reported (participant-assessed) and the participants were probably blinded.                                                                                                                                                                                                                                                                                                                                                                                                                                                                           |
| Incomplete data                        | Low risk     | Our comment: 4.8% of the participants were not evaluated. This number is unlikely to introduce a relevant bias.                                                                                                                                                                                                                                                                                                                                                                                                                                                                                      |
| Selective reporting                    | Low risk     | Our comment: No outcome of interest described in the method section is missing from the result section.                                                                                                                                                                                                                                                                                                                                                                                                                                                                                              |

**Funding sources:** Not stated.

**Hinman et al. 2014**

| Type of bias                           | Judgment | Support for judgment                                                                                                                                                                                                                                       |
|----------------------------------------|----------|------------------------------------------------------------------------------------------------------------------------------------------------------------------------------------------------------------------------------------------------------------|
| Random sequence generation             | Low risk | Quote: "An investigator (K.N.) accessed the computerized randomization to reveal allocation."<br>Our comment: Probably done.                                                                                                                               |
| Allocation concealment                 | Low risk | Our comment: It seems unlikely that the investigators could predict the group allocation due to the sequence generation.                                                                                                                                   |
| Blinding of participants and personnel | Low risk | Quote: "Participant codes for randomized laser treatment groups were pre-programmed into the laser machines by an independent biomechanical engineer to permit blinding of acupuncturist and participants in these groups."<br>Our comment: Probably true. |
| Blinding of assessor                   | Low risk | Our comment: All outcomes of interest are self-reported (participant-assessed) and the participants were probably blinded.                                                                                                                                 |
| Incomplete data                        | Low risk | Our comment: 8.45% and 17.14% had dropped out from the experimental and placebo group at week 12, respectively. Intention to treat analysis was used and this analysis and the results did not differ from the per-protocol analysis.                      |
| Selective reporting                    | Low risk | Our comment: Reported in adherence to a protocol (Australian New Zealand Clinical Trials Registry Number: ACTRN12609001001280).                                                                                                                            |

**Funding - quote:** "Funding/Support: This trial was funded by the National Health and Medical Research Council (project 566783). Drs Hinman and Bennell are both funded in part by Australian Research Council Future Fellowships (FT130100175 and FT0991413, respectively). Dr McCrory is funded in part by a National Health and Medical Research Council Practitioner Fellowship (1026383). Dr Pirotta is funded in part by a National Health and Medical Research Council Career Development Fellowship (1050830). Dr Williamson was funded in part by a National Health and Medical Research Council grant (1004233). Role of the Funder/Sponsor: The study sponsor had no role in the design and conduct of the study; collection, management, analysis, and interpretation of the data; reparation, review, or approval of the manuscript; and decision to submit the manuscript for publication."

**Jensen et al. 1987**

| Type of bias                           | Judgment     | Support for judgment                                                                                                                                                                                                                                                                                                                                                                 |
|----------------------------------------|--------------|--------------------------------------------------------------------------------------------------------------------------------------------------------------------------------------------------------------------------------------------------------------------------------------------------------------------------------------------------------------------------------------|
| Random sequence generation             | Unclear risk | Our comment: The authors state that the study is randomized but there is no description of the randomization method.                                                                                                                                                                                                                                                                 |
| Allocation concealment                 | Unclear risk | Our comment: Not enough information to make a qualified judgment.                                                                                                                                                                                                                                                                                                                    |
| Blinding of participants and personnel | Unclear risk | Quote: (Translated from Danish) "Two coded laser devices of the same appearance was utilized in the trial. One of the devices was inactive and served as control. The other was active with infrared laser."<br>Our comment: The experimental group was treated with invisible laser. The participants were probably blinded, but it is unknown whether the therapists were blinded. |
| Blinding of assessor                   | Low risk     | Our comment: All outcomes of interest are assessed and reported by the participants. The experimental group was treated with invisible laser.                                                                                                                                                                                                                                        |
| Incomplete data                        | Low risk     | Our comment: 1 participant was not evaluated.                                                                                                                                                                                                                                                                                                                                        |
| Selective reporting                    | Low risk     | Our comment: No outcome of interest described in the method section is missing from the result section.                                                                                                                                                                                                                                                                              |

**Funding:** Not stated.

**Kheshie et al. 2014**

| Type of bias                           | Judgment  | Support for judgment                                                                                                                                                                                               |
|----------------------------------------|-----------|--------------------------------------------------------------------------------------------------------------------------------------------------------------------------------------------------------------------|
| Random sequence generation             | Low risk  | Quote: "Randomization was performed simply by assigning a specific identification number for each patient. These numbers were randomized into three groups using the SPSS program".<br>Our comment: Probably done. |
| Allocation concealment                 | Low risk  | Our comment: Investigators are unable to predict the allocation made by a computer-based randomization program.                                                                                                    |
| Blinding of participants and personnel | High risk | Our comment: The study is described as single-blinded and the participants were probably blinded. Thus, the therapist was not blinded.                                                                             |
| Blinding of assessor                   | Low risk  | Our comment: All outcomes of interest are self-reported (participant-assessed) and the participants were probably blinded.                                                                                         |
| Incomplete data                        | Low risk  | Our comment: 15% and 0% dropped out of the placebo and experimental group, respectively. These numbers are unlikely to introduce a relevant bias.                                                                  |
| Selective reporting                    | Low risk  | Our comment: No outcome of interest described in the method section is missing from the result section.                                                                                                            |

**Funding - quote:** "This research received a grant from the Institute of Scientific Research and Revival of Islamic Heritage at Umm Al-Qura University, Makkah, Saudi Arabia."

**Koutenaai et al. 2017**

| Type of bias                           | Judgment     | Support for judgment                                                                                                                                                                                                                                                                   |
|----------------------------------------|--------------|----------------------------------------------------------------------------------------------------------------------------------------------------------------------------------------------------------------------------------------------------------------------------------------|
| Random sequence generation             | Low risk     | Quote: "...were assigned randomly (using random blocks) ...".<br>Our comment: Probably done.                                                                                                                                                                                           |
| Allocation concealment                 | Low risk     | Our comment: The use of random blocks was probably sufficient.                                                                                                                                                                                                                         |
| Blinding of participants and personnel | Low risk     | Quote: "The placebo group also lasted for 70 seconds in these places, but the laser had no output".<br>Our comment: Both participants and therapists were probably blinded because they described the study as double-blinded and treated the intervention group with invisible laser. |
| Blinding of assessor                   | Low risk     | Our comment: All outcomes of interest are self-reported (participant-assessed) and the participants were probably blinded.                                                                                                                                                             |
| Incomplete data                        | Unclear risk | Our comment: Not enough information to make a qualified judgment.                                                                                                                                                                                                                      |
| Selective reporting                    | Low risk     | Our comment: No outcome of interest described in the method section is missing from the result section.                                                                                                                                                                                |

**Funding - quote:** "The study was supported by the Department of Physiotherapy at the University of Social Welfare and Rehabilitation Sciences."

**Mohammed et al. 2017**

| Type of bias                           | Judgment     | Support for judgment                                                                                                                                                                                                                                                                                                                                                                                 |
|----------------------------------------|--------------|------------------------------------------------------------------------------------------------------------------------------------------------------------------------------------------------------------------------------------------------------------------------------------------------------------------------------------------------------------------------------------------------------|
| Random sequence generation             | Unclear risk | Our comment: The authors state that the study is randomized but there is no description of the randomization method.                                                                                                                                                                                                                                                                                 |
| Allocation concealment                 | Unclear risk | Our comment: Not enough information to make a qualified judgment.                                                                                                                                                                                                                                                                                                                                    |
| Blinding of participants and personnel | High risk    | Quote: "(...) placebo laser (laser probe is directed to the same acupoints while the device is off)".<br>Our comment: Probably done. The experimental group was treated with invisible laser. The study is described as single-blinded and the participants were probably blinded. As there was no description of a blinding procedure of the therapist, we assume that this person was not blinded. |
| Blinding of assessor                   | Low risk     | Our comment: All outcomes of interest are self-reported (participant-assessed) and the participants were probably blinded.                                                                                                                                                                                                                                                                           |
| Incomplete data                        | Unclear risk | Our comment: Not enough information to make a qualified judgment.                                                                                                                                                                                                                                                                                                                                    |
| Selective reporting                    | Low risk     | Our comment: No outcome of interest described in the method section is missing from the result section.                                                                                                                                                                                                                                                                                              |

**Funding - quote:** Not stated. The authors state: "The funding organization(s) played no role in the study design; in the collection, analysis, and interpretation of data; in the writing of the report; or in the decision to submit the report for publication."

**Nambi et al. 2016**

| Type of bias                           | Judgment | Support for judgment                                                                                                                                                                                                                                                                                                                             |
|----------------------------------------|----------|--------------------------------------------------------------------------------------------------------------------------------------------------------------------------------------------------------------------------------------------------------------------------------------------------------------------------------------------------|
| Random sequence generation             | Low risk | Quote: "Thirty-four subjects were randomized into two groups (active and placebo) by an investigator who is not involved in assessment, diagnosis or treatment. Randomization was performed by using sealed randomly filled envelopes from a bowl containing an equal number of slips with either number 1 or 2".<br>Our comment: Probably done. |
| Allocation concealment                 | Low risk | Our comment: It seems unlikely that the investigators could predict the group allocation due to the sequence generation.                                                                                                                                                                                                                         |
| Blinding of participants and personnel | Low risk | Quote: "Subjects and the physiotherapist responsible for the evaluation were unaware of randomization results.". "super pulsed laser with (...) or with a placebo probe (...) of the same appearance and display".<br>Our comment: Probably true. The experimental group was treated with invisible laser.                                       |
| Blinding of assessor                   | Low risk | Quote: "All subjects were evaluated by the same blinded physiotherapist".<br>Our comment: Probably done. All outcomes of interest are assessed and reported by the participants who were probably blinded.                                                                                                                                       |
| Incomplete data                        | Low risk | Quote: "The required sample for the study was 17 subjects per group". "All 34 subjects completed the study with the 8-week follow-up evaluation".<br>Our comment: Probably true.                                                                                                                                                                 |
| Selective reporting                    | Low risk | Our comment: No outcomes of interest described in the method section was missing in the result section.                                                                                                                                                                                                                                          |

**Funding - quote:** "Authors are grateful to the Deanship of scientific Research, Prince Sattam Bin Abdul Aziz University, Al-Kharj, Saudi Arabia for the financial support to carry out this project no 2015/01/4375. Research funding program: Specialized Research Grant program (Health)".

**Nivbrant et al. 1992**

| Type of bias                           | Judgment     | Support for judgment                                                                                                                                                                                                                                                                                                                                               |
|----------------------------------------|--------------|--------------------------------------------------------------------------------------------------------------------------------------------------------------------------------------------------------------------------------------------------------------------------------------------------------------------------------------------------------------------|
| Random sequence generation             | Low risk     | Our comment: Randomization was performed by drawing of randomly filled envelopes describing the treatment group.                                                                                                                                                                                                                                                   |
| Allocation concealment                 | Unclear risk | Our comment: It is unclear whether envelopes were sequentially numbered, opaque and sealed.                                                                                                                                                                                                                                                                        |
| Blinding of participants and personnel | Low risk     | Quote (translated from Swedish): <i>"The placebo emitter was visually identical to the active laser. A practitioner otherwise not involved in the trial treated the participants with laser. The practitioner was unaware of which was the active and inactive laser."</i><br>Our comment: Probably done. The experimental group was treated with invisible laser. |
| Blinding of assessor (detection bias)  | Low risk     | Our comment: All outcomes of interest are self-reported (participant-assessed) and the participants were probably blinded.                                                                                                                                                                                                                                         |
| Incomplete data                        | Low risk     | Our comment: 13% in each group were not evaluated. This number is unlikely to introduce a relevant bias.                                                                                                                                                                                                                                                           |
| Selective reporting                    | Low risk     | Our comment: No outcome of interest described in the method section is missing from the result section.                                                                                                                                                                                                                                                            |

**Funding:** Not stated.

**Rayegani et al. 2012**

| Type of bias                           | Judgment     | Support for judgment                                                                                                                                                                                                                                                                                   |
|----------------------------------------|--------------|--------------------------------------------------------------------------------------------------------------------------------------------------------------------------------------------------------------------------------------------------------------------------------------------------------|
| Random sequence generation             | Low risk     | Randomization was ensured by having patients randomly choose sealed envelopes from a bowl.                                                                                                                                                                                                             |
| Allocation concealment                 | Unclear risk | Our comment: It is unclear whether the envelopes were opaque.                                                                                                                                                                                                                                          |
| Blinding of participants and personnel | Low risk     | Quote: <i>"Neither the patients nor the operator knew which was the active or placebo LLLT probe."</i> <i>"The placebo group was treated with an ineffective probe (power 0 mW) and with the same method."</i><br>Our comment: Probably done. The experimental group was treated with invisible laser. |
| Blinding of assessor                   | Low risk     | Our comment: All outcomes of interest are self-reported (participant-assessed) and the participants were probably blinded.                                                                                                                                                                             |
| Incomplete data                        | Unclear risk | Our comment: Not enough information to make a qualified judgment.                                                                                                                                                                                                                                      |
| Selective reporting                    | Low risk     | Our comment: No outcome of interest described in the method section is missing from the result section.                                                                                                                                                                                                |

**Funding:** Not stated.

**Tascioglu et al. 2004**

| Type of bias                           | Judgment     | Support for judgment                                                                                                                                                                                    |
|----------------------------------------|--------------|---------------------------------------------------------------------------------------------------------------------------------------------------------------------------------------------------------|
| Random sequence generation             | Low risk     | Quote: <i>"Sixty patients, who fulfilled the entry criteria, were admitted to the study and they were randomly divided into three groups using numbered envelopes"</i> .<br>Our comment: Probably done. |
| Allocation concealment                 | Unclear risk | Our comment: It is unclear whether the envelopes were sealed and opaque.                                                                                                                                |
| Blinding of participants and personnel | High risk    | Our comment: The study is described as single-blinded and the participants were probably blinded. Thus, the therapist was probably not blinded.                                                         |
| Blinding of assessor                   | Low risk     | Our comment: All outcomes of interest are assessed and reported by the participants who were probably blinded.                                                                                          |
| Incomplete data                        | Low risk     | Our comment: No dropouts.                                                                                                                                                                               |
| Selective reporting                    | Low risk     | Our comment: No outcome of interest described in the method section is missing from the result section.                                                                                                 |

**Funding:** Not stated.

## Youssef et al. 2016

| Type of bias                           | Judgment     | Support for judgment                                                                                                                                                                                                                                                                                                                                                                                             |
|----------------------------------------|--------------|------------------------------------------------------------------------------------------------------------------------------------------------------------------------------------------------------------------------------------------------------------------------------------------------------------------------------------------------------------------------------------------------------------------|
| Random sequence generation             | Low risk     | Quote: "They were assigned randomly to three groups by a blinded and independent research assistant who opened sealed envelopes that contained a computer-generated randomization card according to the recruitment diagram."<br>Our comment: Probably done.                                                                                                                                                     |
| Allocation concealment                 | Low risk     | Our comment: Not enough information to make a qualified judgment.                                                                                                                                                                                                                                                                                                                                                |
| Blinding of participants and personnel | Unclear risk | Quote: "(...) in the placebo group, procedure was identical but without emission of energy. The laser equipment had two identical pens, one for the active treatment and one for the placebo treatment (sealed)."<br>Our comment: Probably done. The experimental group was treated with invisible laser. The participants were probably blinded, but there was no information regarding blinding of therapists. |
| Blinding of assessor                   | Low risk     | Our comment: All outcomes of interest are self-reported (participant-assessed) and the participants were probably blinded.                                                                                                                                                                                                                                                                                       |
| Incomplete data                        | Low risk     | 1 participant was not evaluated.                                                                                                                                                                                                                                                                                                                                                                                 |
| Selective reporting                    | Low risk     | Our comment: No outcome of interest described in the method section is missing from the result section.                                                                                                                                                                                                                                                                                                          |

**Funding:** Not stated.

### Low-Level Laser Therapy with and without exercise therapy

Subgroup analyses were performed to assess the impact of exercise therapy on the effect of Low-Level Laser Therapy in a treatment package (results are from immediately after the end of therapy, primarily). Low-Level Laser Therapy was significantly superior to the placebo-control both with and without exercise therapy (figure 16-17). The levels of statistical heterogeneity were unaltered in the pain analyses (figure 16), and slightly lowered in the disability analysis (figure 17).

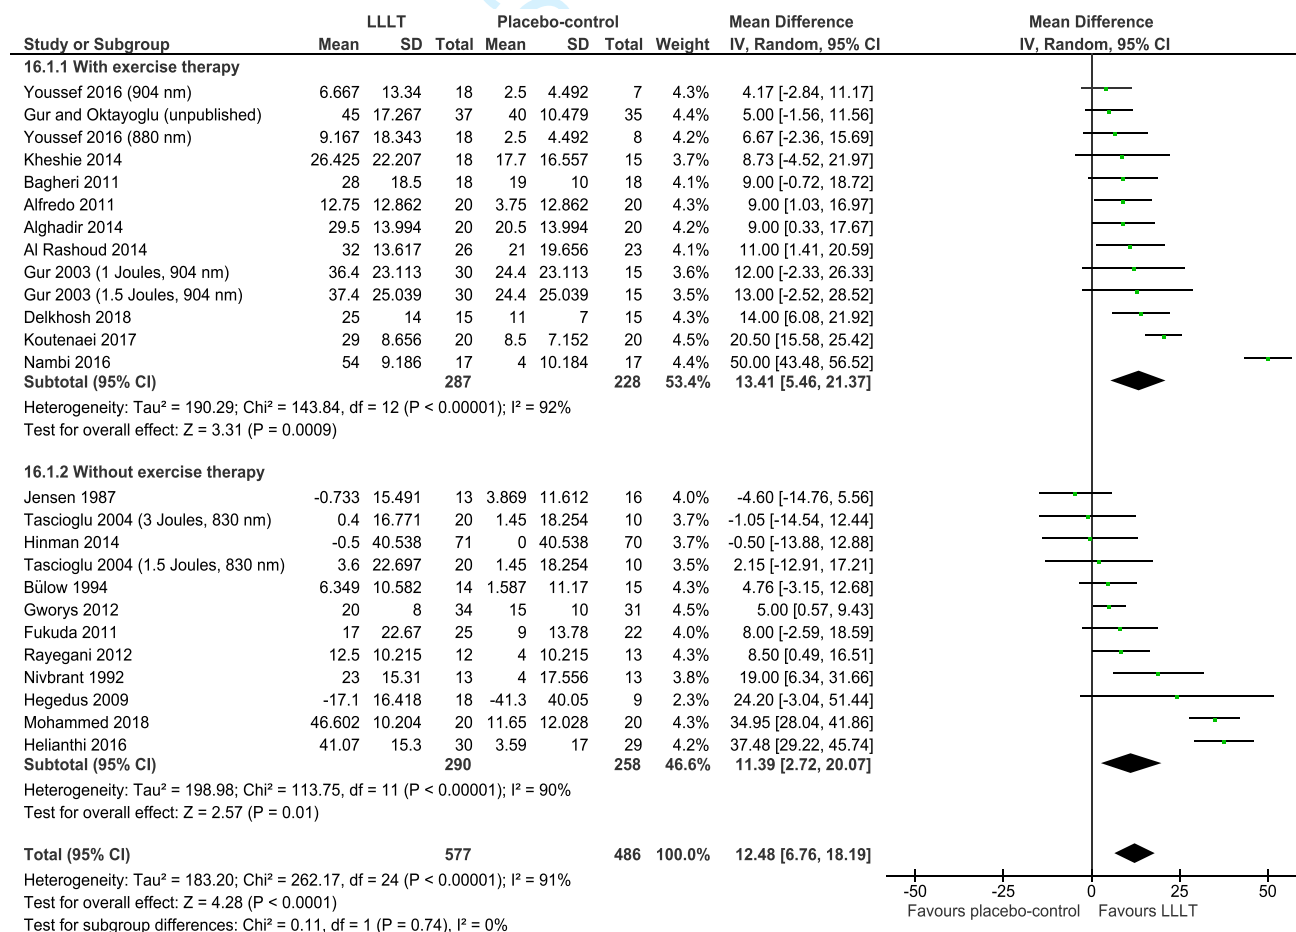

Figure 16 | Low-Level Laser Therapy with and without exercise therapy (pain)



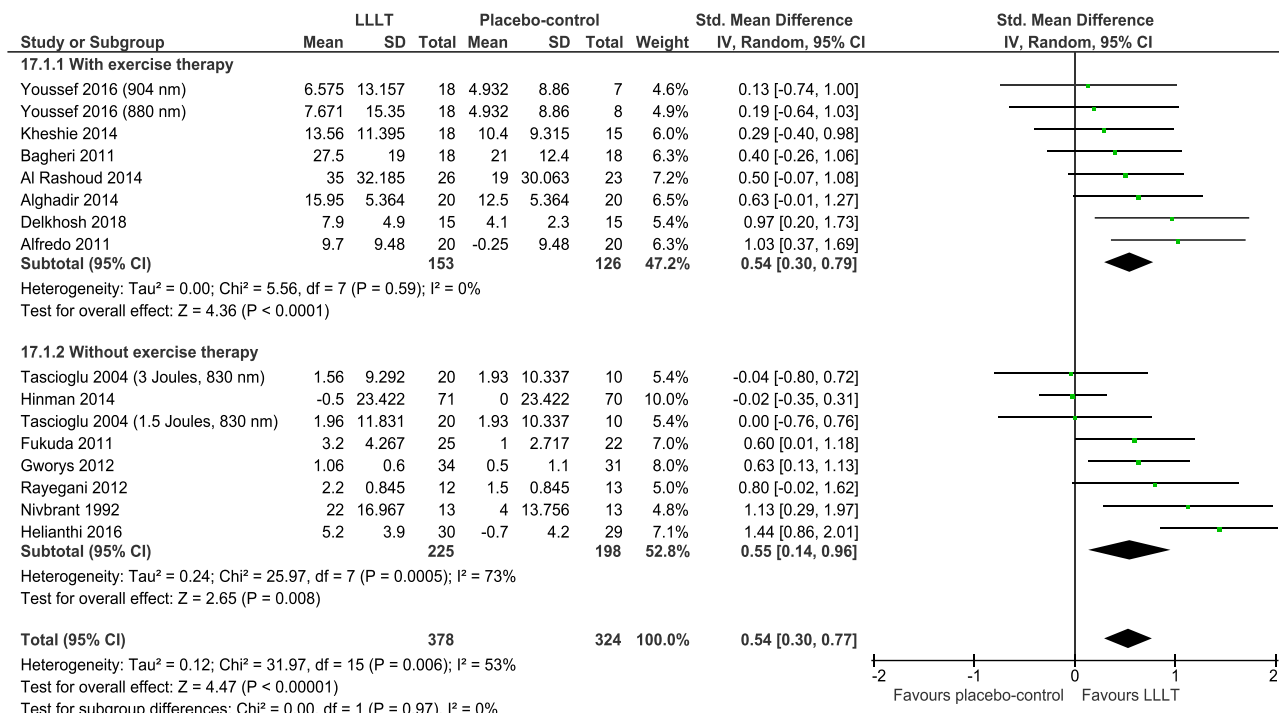

Figure 17 | Low-Level Laser Therapy with and without exercise therapy (disability)

**Mean Difference vs Standardized Mean Difference**

The levels of statistical heterogeneity changed only negligible when we switched from the Mean Difference (MD) method to the Standardized Mean Difference (SMD) method (figure 18-21). The trial by Hegedus et al. was omitted from these analyses as they solely reported final scores, and it is inappropriate to mix final scores with change scores in SMD analyses (figure 18-19).

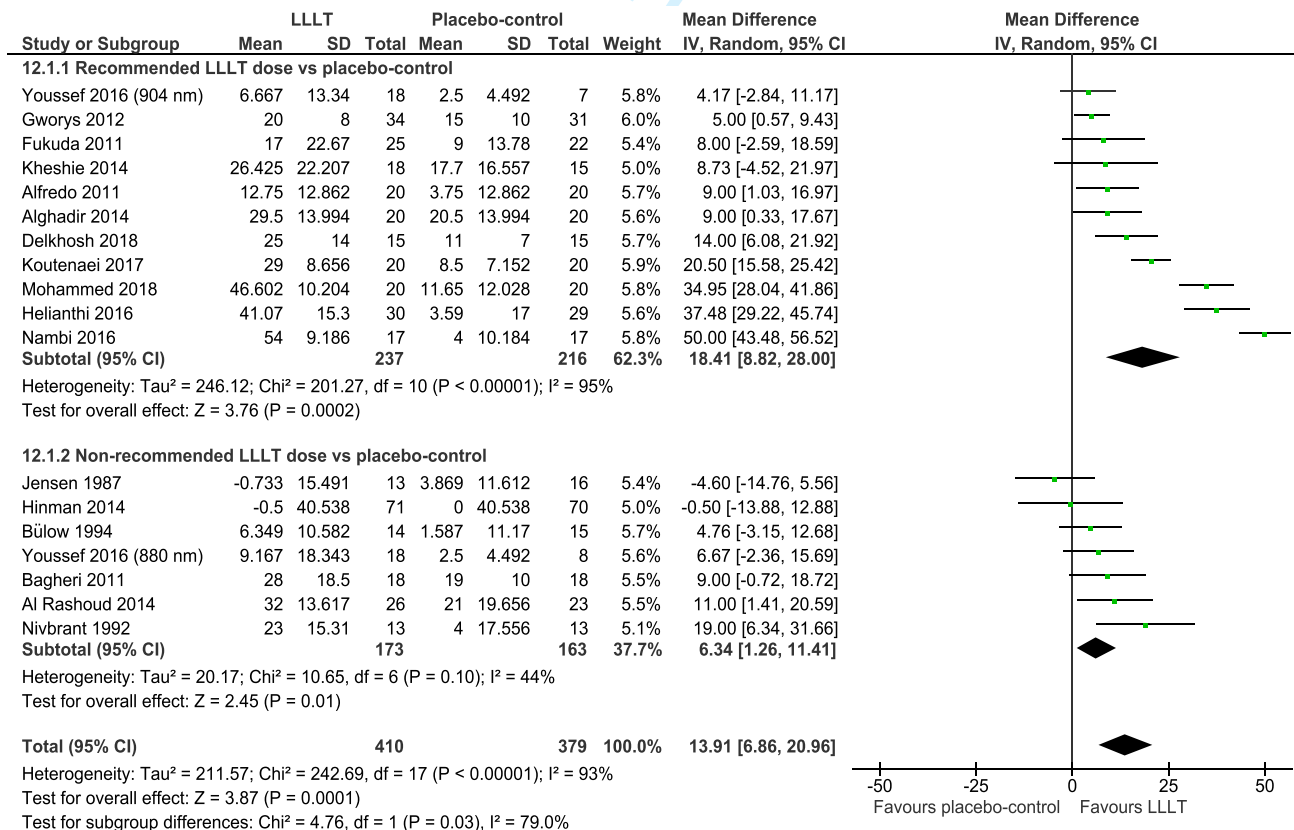

Figure 18 | Mean Difference (pain results from immediately after the end of therapy)



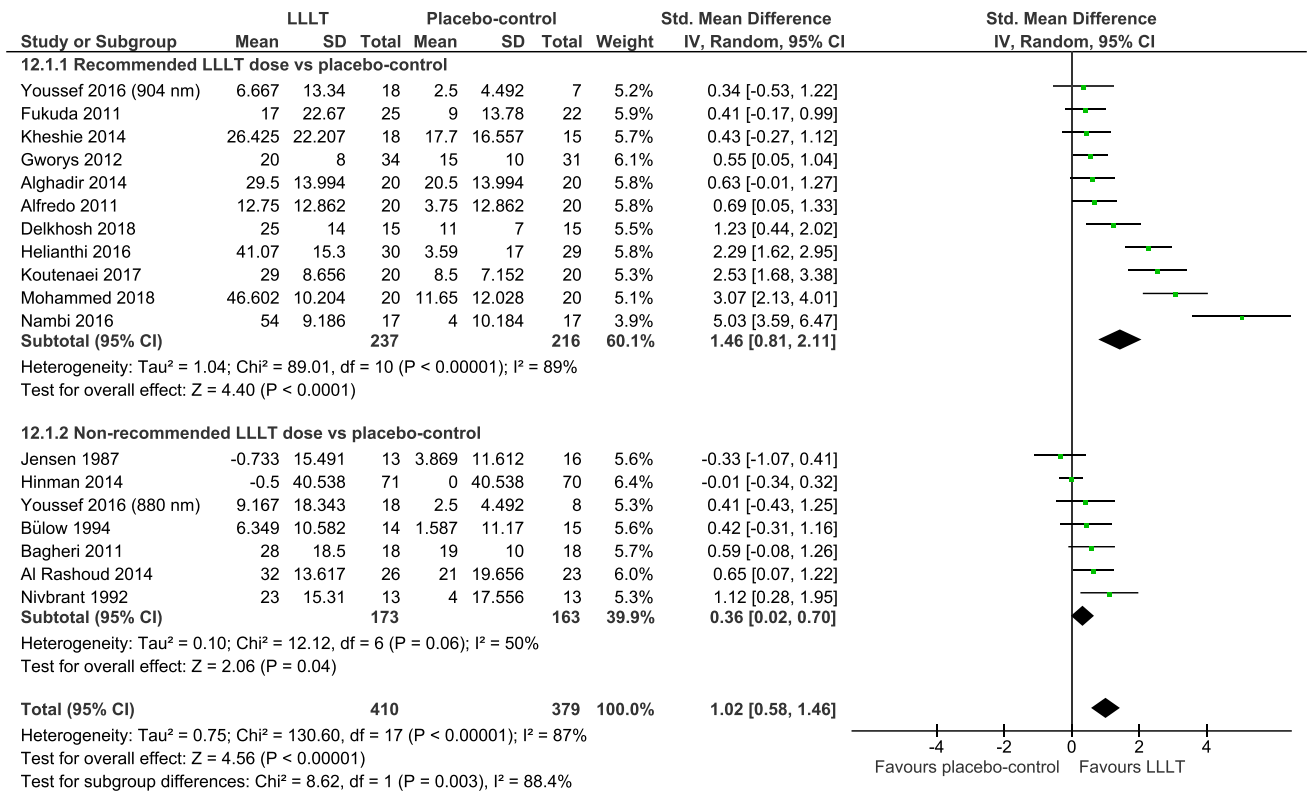

Figure 19 | Standardized Mean Difference (pain results from immediately after the end of therapy)

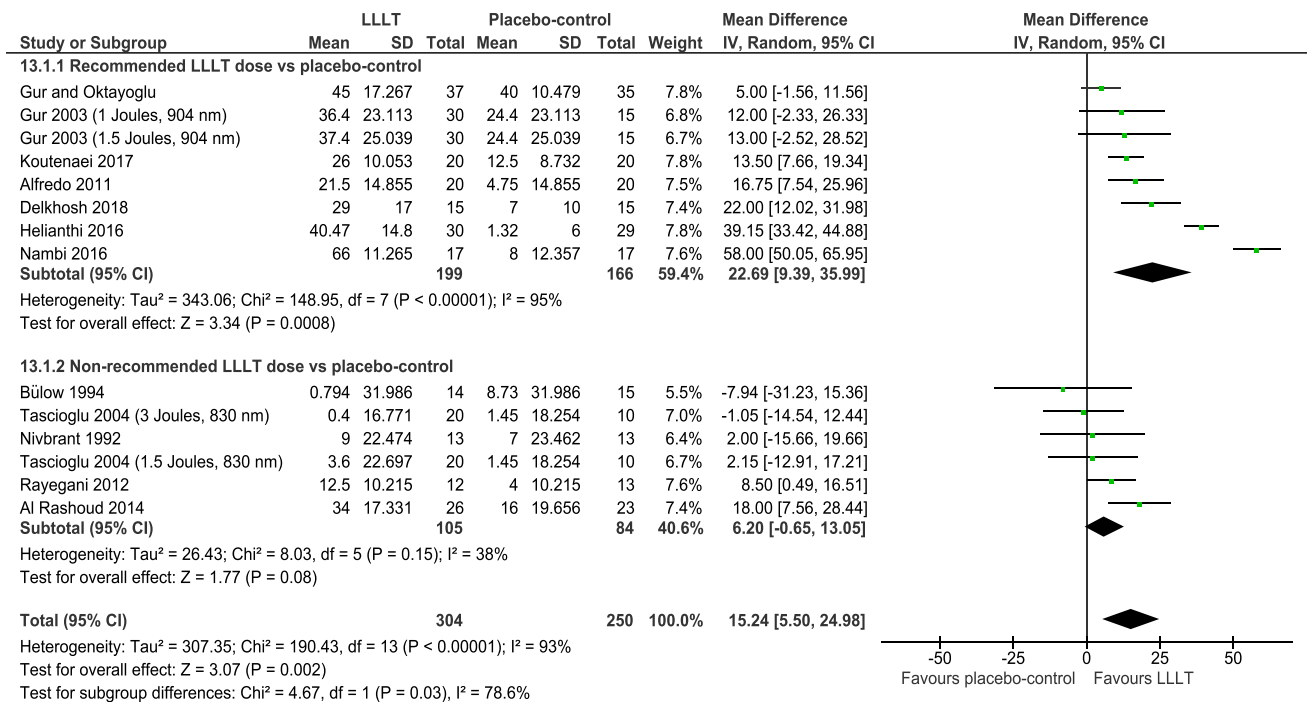

Figure 20 | Mean Difference (pain results from 2-12-weeks follow-ups)

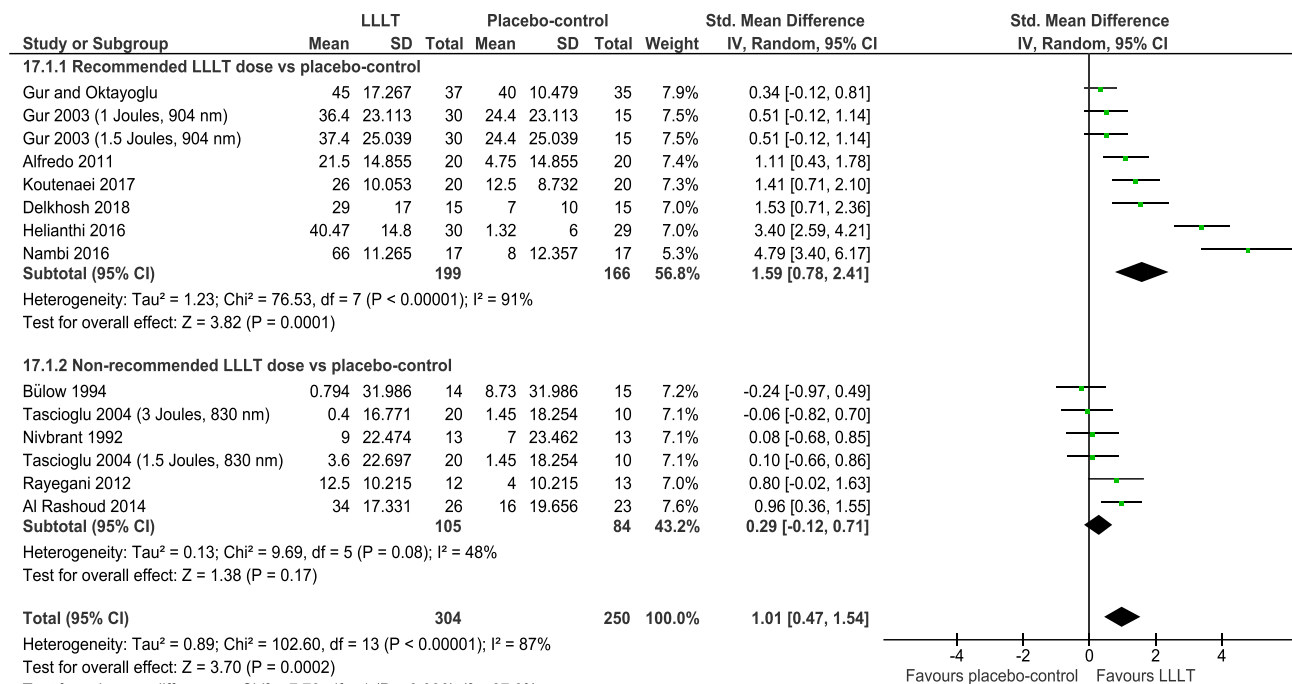

Figure 21 | Standardized Mean Difference (pain results from 2-12-weeks follow-ups)

References

- Alayat MSM, Aly THA, Elsayed AEM, Fadil ASM. Efficacy of pulsed Nd:YAG laser in the treatment of patients with knee osteoarthritis: A randomized controlled trial. *Lasers Med Sci* 2017; **32**: 503-11.
- Ciechanowska K, Lukowicz M, Weber-Zimmermann M, Buszko K. Ocena skuteczności terapii skojarzonej - Laseroterapii i terapii zinnem z kompresoterapią w leczeniu objawów gonartrozy. *Postępy Rehabilitacji* 2008.
- Coelho, Leal-Junior E, Biasotto-Gonzalez D, et al. Effectiveness of phototherapy incorporated into an exercise program for osteoarthritis of the knee: Study protocol for a randomized controlled trial. *BMC* 2014; **15**.
- de Matos Brunelli Braghin R, Cavaleiro Libardi E, Junqueira C, et al. The effect of low-level laser therapy and physical exercise on pain, stiffness, function, and spatiotemporal gait variables in subjects with bilateral knee osteoarthritis: A blind randomized clinical. *Disabil Rehabil: Epub ahead of print* 2018
- de Meneses SR, Hunter DJ, Young Docko E, Pasqual Marques A. Effect of low-level laser therapy (904 nm) and static stretching in patients with knee osteoarthritis: A protocol of randomised controlled trial. *BMC Musculoskelet Disord* 2015; **16**.
- de Paula Gomes CAF, Leal-Junior ECP, Dibai-Filho AV, et al. Incorporation of photobiomodulation therapy into a therapeutic exercise program for knee osteoarthritis: A placebo-controlled, randomized, clinical trial. *Lasers Surg Med* 2018; **8**: 819-28.
- Giavelli S, Fava G, Castronuovo G, Spinoglio L, Galanti A. Laserterapia con bassa potenza nelle malattie osteoarticolari nel paziente geriatrico. *La Radiologia medica* 1998; **95**: 303-9.
- Gotte S, Keyi W, Wirzbach E. Doppelblindstudie zur Überprüfung der Wirksamkeit und Verträglichkeit einer niederenergetischen Lasertherapie bei Patienten mit aktivierter Gonarthrose [German]. *Jatros Orthopadie* 1995; **12**: 30-4.
- Kujawa J, Talar J, Gworys K, Gworys P, Pieszynski I, Janiszewski M. The analgesic effectiveness of laser therapy in patients with gonarthrosis: An evaluation. *Ortop Traumatol Rehabil* 2004; **6**: 356-66.
- Leal-Junior ECP, Johnson DS, Saltmarche A, Demchak T. Adjunctive use of combination of super-pulsed laser and light-emitting diodes phototherapy on nonspecific knee pain: Double-blinded randomized placebo-controlled trial. *Lasers Med Sci* 2014; **29**: 1839-47.
- Lepilina A, Nikulicheva I, Speranskii V. Laseroterapiia pri revmatoidnom artrite i deformiruiushchem osteoartroze. *Sov Med* 1990: 82-4.
- Marquina N, Dumoulin-White R, Mandel A, Lilge L. Laser therapy applications for osteoarthritis and chronic joint pain – A randomized placebo-controlled clinical trial. *Photonics Lasers Med* 2012; **1**: 299-307.
- Montes-Molina R, Madronero-Agreda MA, Romojaro-Rodriguez AB, et al. Efficacy of interferential low-level laser therapy using two independent sources in the treatment of knee pain. *Photomed Laser Surg* 2009; **27**: 467-71.

- 1  
2  
3  
4  
5  
6  
7  
8  
9  
10  
11  
12  
13  
14  
15  
16  
17  
18  
19  
20  
21  
22  
23  
24  
25  
26  
27  
28  
29  
30  
31  
32  
33  
34  
35  
36  
37  
38  
39  
40  
41  
42  
43  
44  
45  
46  
47  
48  
49  
50  
51  
52  
53  
54  
55  
56  
57  
58  
59  
60
- 14 Nakamura T, Ebihara S, Ohkuni I, et al. Low level laser therapy for chronic knee joint pain patients. *Laser Ther* 2014; **23**: 273-7.
- 15 Paolillo FR, Paolillo AR, João JP, et al. Ultrasound plus low-level laser therapy for knee osteoarthritis rehabilitation: A randomized, placebo-controlled trial. *Rheumatol int* 2018; **38**: 785-93. doi: 10.1007/s00296-018-4000-x
- 16 Pinfildi CE, Sardim AC, Yi LC, Prado RP. Neuromuscular training with phototherapy associated in patients knee osteoarthritis. *Arch Phys Med Rehabil* 2013; **94**: e59-e60.
- 17 Ren XM, Wang M, Shen XY, Wang LZ, Zhao L. Clinical observation on acupoint irradiation with combined laser or red light on patients with knee osteoarthritis of yang deficiency and cold coagulation type. *Zhongguo Zhen Jiu* 2010; **30**: 977-81.
- 18 Shen X, Zhao L, Ding G, et al. Effect of combined laser acupuncture on knee osteoarthritis: a pilot study. *Lasers med sci* 2009; **24**: 129-36.
- 19 Soleimanpour H, Gahramani K, Taheri R, et al. The effect of low-level laser therapy on knee osteoarthritis: Prospective, descriptive study. *Lasers med sci* 2014; **29**: 1695-700.
- 20 Stelian J, Gil I, Habot B, et al. Improvement of pain and disability in elderly patients with degenerative osteoarthritis of the knee treated with narrow-band light therapy. *J Am Geriatr Soc* 1992; **40**: 23-6.
- 21 Trelles MA, Rigau J, Sala P, Calderhead G, Ohshiro T. Infrared diode laser in low reactive-level laser therapy (LLLT) for knee osteoarthritis. *Laser Therapy* 1991; **3**: 149-53.
- 22 Wang L, Wu F, Zhao L, et al. Patterns of traditional chinese medicine diagnosis in thermal laser acupuncture treatment of knee osteoarthritis. *Evidence-Based Complementary and Alternative Medicine* 2013.
- 23 Yavuz M, Ataoglu S, Ozsahin M, Baki A, Icmel C. Primer Diz Osteoartritinde İzokinetik Egzersiz, Lazer ve Diklofenak İyontoforezi Uygulamalarının Etkilerinin ve Etkinliklerinin Karşılaştırılması. *Düzce Medical Journal* 2013; **15**: 15-21.
- 24 Yurtkuran M, Alp A, Konur S, Özçakir S, Bingol U. Laser acupuncture in knee osteoarthritis: A double-blind, randomized controlled study. *Photomed Laser Surg* 2007; **25**: 14-20.
- 25 Yuvarani G, Thonisha Xavier L, Mohan Kumar G, et al. To compare the effectiveness between LASER and neuromuscular electrical stimulation in knee osteoarthritis. *Biomedicine (India)* 2018; **38**: 142-46.
- 26 Zhao L, Shen X, Cheng K, et al. Validating a nonacupoint sham control for laser treatment of knee osteoarthritis. *Photomed Laser Surg* 2010; **28**: 351-6.
- 27 Zou YC, Deng HY, Mao Z, Zhao C, Huang J, Liu G. Decreased synovial fluid ghrelin levels are linked with disease severity in primary knee osteoarthritis patients and are increased following laser therapy. *Clin Chim Acta* 2017; **470**: 64-9.

## PRISMA checklist

| Section/topic                      | #  | Checklist item                                                                                                                                                                                                                                                                                              | Reported on page #                                    |
|------------------------------------|----|-------------------------------------------------------------------------------------------------------------------------------------------------------------------------------------------------------------------------------------------------------------------------------------------------------------|-------------------------------------------------------|
| <b>TITLE</b>                       |    |                                                                                                                                                                                                                                                                                                             |                                                       |
| Title                              | 1  | Identify the report as a systematic review, meta-analysis, or both.                                                                                                                                                                                                                                         | Page 1                                                |
| <b>ABSTRACT</b>                    |    |                                                                                                                                                                                                                                                                                                             |                                                       |
| Structured summary                 | 2  | Provide a structured summary including, as applicable: background; objectives; data sources; study eligibility criteria, participants, and interventions; study appraisal and synthesis methods; results; limitations; conclusions and implications of key findings; systematic review registration number. | Page 1                                                |
| <b>INTRODUCTION</b>                |    |                                                                                                                                                                                                                                                                                                             |                                                       |
| Rationale                          | 3  | Describe the rationale for the review in the context of what is already known.                                                                                                                                                                                                                              | Page 2-3                                              |
| Objectives                         | 4  | Provide an explicit statement of questions being addressed with reference to participants, interventions, comparisons, outcomes, and study design (PICOS).                                                                                                                                                  | Page 3 + PROSPERO protocol                            |
| <b>METHODS</b>                     |    |                                                                                                                                                                                                                                                                                                             |                                                       |
| Protocol and registration          | 5  | Indicate if a review protocol exists, if and where it can be accessed (e.g., Web address), and, if available, provide registration information including registration number.                                                                                                                               | Page 3                                                |
| Eligibility criteria               | 6  | Specify study characteristics (e.g., PICOS, length of follow-up) and report characteristics (e.g., years considered, language, publication status) used as criteria for eligibility, giving rationale.                                                                                                      | Page 3 + PROSPERO protocol                            |
| Information sources                | 7  | Describe all information sources (e.g., databases with dates of coverage, contact with study authors to identify additional studies) in the search and date last searched.                                                                                                                                  | Page 3 + PROSPERO protocol                            |
| Search                             | 8  | Present full electronic search strategy for at least one database, including any limits used, such that it could be repeated.                                                                                                                                                                               | Supplementary material                                |
| Study selection                    | 9  | State the process for selecting studies (i.e., screening, eligibility, included in systematic review, and, if applicable, included in the meta-analysis).                                                                                                                                                   | Page 3 + PROSPERO protocol                            |
| Data collection process            | 10 | Describe method of data extraction from reports (e.g., piloted forms, independently, in duplicate) and any processes for obtaining and confirming data from investigators.                                                                                                                                  | Page 4 + PROSPERO protocol                            |
| Data items                         | 11 | List and define all variables for which data were sought (e.g., PICOS, funding sources) and any assumptions and simplifications made.                                                                                                                                                                       | Page 5-8 (table 1-2) + PROSPERO protocol              |
| Risk of bias in individual studies | 12 | Describe methods used for assessing risk of bias of individual studies (including specification of whether this was done at the study or outcome level), and how this information is to be used in any data synthesis.                                                                                      | Page 3-4 + PROSPERO protocol + supplementary material |
| Summary measures                   | 13 | State the principal summary measures (e.g., risk ratio, difference in means).                                                                                                                                                                                                                               | Page 4 + PROSPERO protocol                            |
| Synthesis of results               | 14 | Describe the methods of handling data and combining results of studies, if done, including measures of consistency (e.g., $I^2$ ) for each meta-analysis.                                                                                                                                                   | Page 4 + supplementary material + PROSPERO protocol   |

## PRISMA checklist (continued)

| Section/topic                 | #  | Checklist item                                                                                                                                                                                           | Reported on page #                             |
|-------------------------------|----|----------------------------------------------------------------------------------------------------------------------------------------------------------------------------------------------------------|------------------------------------------------|
| Risk of bias across studies   | 15 | Specify any assessment of risk of bias that may affect the cumulative evidence (e.g., publication bias, selective reporting within studies).                                                             | Page 3 + 9 + supplementary material            |
| Additional analyses           | 16 | Describe methods of additional analyses (e.g., sensitivity or subgroup analyses, meta-regression), if done, indicating which were pre-specified.                                                         | Page 9 + supplementary material                |
| <b>RESULTS</b>                |    |                                                                                                                                                                                                          |                                                |
| Study selection               | 17 | Give numbers of studies screened, assessed for eligibility, and included in the review, with reasons for exclusions at each stage, ideally with a flow diagram.                                          | Page 4 + figure 1 + supplementary material     |
| Study characteristics         | 18 | For each study, present characteristics for which data were extracted (e.g., study size, PICOS, follow-up period) and provide the citations.                                                             | Page 5-8 (table 1-2)                           |
| Risk of bias within studies   | 19 | Present data on risk of bias of each study and, if available, any outcome level assessment (see item 12).                                                                                                | Page 9 (figure 6) + supplementary material     |
| Results of individual studies | 20 | For all outcomes considered (benefits or harms), present, for each study: (a) simple summary data for each intervention group (b) effect estimates and confidence intervals, ideally with a forest plot. | figure 2-5                                     |
| Synthesis of results          | 21 | Present results of each meta-analysis done, including confidence intervals and measures of consistency.                                                                                                  | Page 8-9 + figure 2-5 + supplementary material |
| Risk of bias across studies   | 22 | Present results of any assessment of risk of bias across studies (see Item 15).                                                                                                                          | Page 9 + supplementary material                |
| Additional analysis           | 23 | Give results of additional analyses, if done (e.g., sensitivity or subgroup analyses, meta-regression [see Item 16]).                                                                                    | Page 9 + supplementary material                |
| <b>DISCUSSION</b>             |    |                                                                                                                                                                                                          |                                                |
| Summary of evidence           | 24 | Summarize the main findings including the strength of evidence for each main outcome; consider their relevance to key groups (e.g., healthcare providers, users, and policy makers).                     | Page 10-11                                     |
| Limitations                   | 25 | Discuss limitations at study and outcome level (e.g., risk of bias), and at review-level (e.g., incomplete retrieval of identified research, reporting bias).                                            | Page 11                                        |
| Conclusions                   | 26 | Provide a general interpretation of the results in the context of other evidence, and implications for future research.                                                                                  | Page 11                                        |
| <b>FUNDING</b>                |    |                                                                                                                                                                                                          |                                                |
| Funding                       | 27 | Describe sources of funding for the systematic review and other support (e.g., supply of data); role of funders for the systematic review.                                                               | Page 11 + PROSPERO protocol                    |
